# Supplementary material for: Adding country resolution to EXIOBASE: impacts on land use embodied in trade
Source: J Econ Struct. 2020 Feb 13;9(1):14. doi: 10.1186/s40008-020-0182-y (PMC7021151; doi:10.1186/s40008-020-0182-y)
Supplement: Supplementary file 3 — Additional file 3. Land use time series results (1995–2015). [file 40008_2020_182_MOESM3_ESM.xlsx]

## Sheet: Info
Sheet**	Description
LandUse_pc	Land use per capita in 1000 m²
LandUse_pc_growth	Growth in land use per capita (1995 as reference year*)
GDP_pc	GDP per capita measured in 1E3 Euros
BLEBT_ts	Balance of land embodied in trade: exports as share of production minues imports as share of consumption
land_exports	Total exported land in km²
land_exports_growth	Growth in total exported land (1995 as reference year*)
land_exports_of_global	Share of globally exported land
land_imports	Total imported land in km²
land_imports_growth	Growth in total imported land (1995 as reference year*)
land_imports_of_global	Share of globally imported land
land_production	Total produced land in km²
land_production_growth	Growth in total produced land (1995 as reference year*)
land_consumption	Total consumed land in km²
land_consumption_growth	Growth in total consumed land (1995 as reference year*)
Cropland_pc	Per capita cropland footprint in 1000 m²
Forest_pc	Per capita forest land footprint in 1000 m²
Grazing_land_pc	Per capita grazing land footprint in 1000 m²
Other_land_pc	Per capita Other land footprint in 1000 m²
Infrastructure_land_pc	Per capita infrastructure land use footprint in 1000 m²
Marginal_land_pc	Per capita maginal land use footprint in 1000 m²
Cropland_importshare	Import as share of total cropland footprint in 1000 m²
Forest_importshare	Import as share of total forest land footprint in 1000 m²
Grazing_land_importshare	Import as share of total grazing land footprint in 1000 m²
Other_land_importshare	Import as share of total other land footprint in 1000 m²
Infrastructure_land_importshare	Import as share of total infrastructure land use footprint in 1000 m²
Marginal_land_importshare	Import as share of total maginal land use footprint in 1000 m²
*	If 1995 data does not exist, 1996 is chosen. If neither 1995 nor 1996 data is available, N/A is displayed for all years
**	Cases where the IO tables are unbalanced or there is no data are set to zero. These cases are marked with light red cells

## Sheet: LandUse_pc
Country Name	1995	1996	1997	1998	1999	2000	2001	2002	2003	2004	2005	2006	2007	2008	2009	2010	2011	2012	2013	2014	2015
Afghanistan		19.4256	18.7643	18.0326	17.4997			16.2264	15.1547	15.3919	15.0087	14.5535	14.6864	14.9008	14.3877	14.1616	13.6768	13.5218	12.8079	12.5602	12.134
Albania	8.74058	8.89816	8.86242	9.11408	9.04796	8.98209	8.94643	11.0307	11.1251	11.7764	11.8921	11.9846	12.1761	11.5617	10.4222	11.0665	11.7509	10.6054	10.8367	10.5826	10.6404
Algeria	8.73549	8.77507	8.49362	8.24265	8.1406	7.44811	7.72426	9.23675	8.36387	8.57576	8.22133	7.48652	7.00187	7.70049	7.70177	6.69138	6.6488	6.62675	7.12953	7.36408	7.02218
Andorra	11.6657	11.2458	12.17	12.6394	12.4325	11.4541	10.3042	10.5852	10.7503	11.9626	11.5593	12.8497	16.5008	11.999	10.41	13.2991	12.489	11.354	9.94004	10.4217	10.3446
Angola	72.5185	60.5452	65.5517	64.2296	60.7646	63.5229	34.8283	36.5977	59.497	50.3608	53.4158	50.4648	50.5138	50.1445	51.2808	46.4386	44.5344	38.9669	43.5483	42.3539	34.8966
Anguilla	23.6007	32.0591	26.6626	31.7334	13.7403	26.539	16.8679	20.7147	15.1127		14.4451	24.7627	20.5486	24.909	16.6915	21.4919	12.1656	11.8819	13.7942	14.5477	13.3584
Antigua and Barbuda	14.7791	15.0314	12.3872	15.3659	7.45913	10.3071	8.32645	13.6876	14.5178	21.9251	10.6291	10.3353	11.2348	11.4362	19.0887	21.0422	12.8301	28.2175	9.43226	9.28512	10.3152
Argentina	64.6359	64.0761	63.2939	62.8425	61.8282	60.8111	59.0379	50.1453	51.1154	47.4648	47.3506	47.9139	47.9346	47.1534	47.2697	47.1097	46.2908	46.6162	45.6098	44.5796	44.159
Armenia	9.05416	9.42852	9.83197	9.83348	9.70145	9.92462	10.3779	11.8088	10.3244	10.6226	10.5872	12.2309	13.7359	13.0624	10.6751	13.3908	14.0992	12.0555	11.7417	11.5011	11.7359
Aruba	40.1357	49.2042	44.3065	23.8602	47.5374	33.6727	29.1001	19.5344	16.6239	20.5823	17.5652	16.2772	17.5138	56.0868	76.6269	102.05	41.3908	25.0888	19.8584	15.1115	14.4143
Australia	182.49	177.346	178.203	178.253	176.198	159.388	151.74	153.678	168.14	158.691	150.934	146.608	142.918	123.072	138.836	110.168	103.116	112.044	100.988	84.8569	75.5618
Austria	16.596	15.7435	15.223	16.7069	16.798	18.0451	15.805	16.1953	16.1892	16.603	15.3728	14.8591	14.1275	13.6357	13.7338	14.3676	13.9206	13.7105	14.7129	14.0426	13.8115
Azerbaijan	10.7908	11.1697	10.9863	11.3455	12.1227	11.0548	11.0039	12.1585	12.8383	13.9899	10.76	11.0322	11.1398	9.91305	9.57371	12.6838	13.8267	11.5227	13.0188	12.8711	13.8681
Bahamas	38.669	39.9362	41.6089	42.6467	38.8077	38.4297	37.7792	32.3023	32.9883	35.4364	34.2672	34.2118	32.2821	30.8726	33.0288	31.346	29.5242	32.4365	32.4261	31.7335	30.4363
Bahrain	30.8133	21.1689	20.5439	13.1797	16.4838	20.2523	24.0639	26.0895	15.8197	25.2985	19.1428	12.5311	11.5661	29.8912	30.4429	26.5701	20.0728	17.8762	10.2188	10.4187	9.03164
Bangladesh	1.32616	1.30542	1.27348	1.27485	1.20233	1.14443	1.11162	1.16112	1.294	1.13752	1.14389	1.28239	1.36955	1.13777	1.22908	1.19516	1.21287	1.10663	1.1615	1.16149	1.22471
Barbados	9.2254	13.8729	15.0659	11.2938	7.82582	10.0127	10.2524	11.1592	14.5471	14.5298	11.7361	11.057	10.6704	12.1963	21.0759	13.8422	13.04	16.0349	8.04315	7.44647	8.43623
Belarus	18.5162	18.4895	17.9521	20.0978	19.4883	20.2468	14.0949	16.7502	16.7132	17.8063	14.9109	16.6832	15.5571	15.6734	13.8258	16.8061	15.3928	14.7063	16.2392	16.7304	16.4378
Belgium	26.6701	22.1908	18.3488	23.0035	17.5876	15.3579	20.9142	17.8703	16.7105	17.1303	15.9184	15.1459	22.6426	22.5316	18.261	22.3094	22.1368	20.7641	20.7756	19.8977	20.1421
Belize	71.0611	64.8743	74.1253	64.8888	77.0418	69.2766	62.0789	59.8764	62.1131	50.6157	61.7089	56.2661	53.4887	53.9586	55.2387	40.7846	41.3617	38.0007	37.255	35.7667	35.3759
Benin	19.7734	18.7331	17.6739	17.5441	16.8939	16.3138	15.1124	14.6876	15.2085	14.1221	13.63	13.4213	12.5714	12.8271	12.019	11.0415	10.7881	9.93701	9.62142	9.87038	9.48506
Bermuda	7.70473	3.90956	4.49908	5.36964	4.15506	21.9947	63.1099	113.616	15.0231	7.34045		3.34973	2.76979	2.62719	2.57832	1.88501	1.9619	1.85627	2.24267	2.22869	2.12639
Bhutan	60.6612	61.5149	60.4535	59.3636	50.314	56.683	55.7673	54.9882	51.249	52.5357	47.484	31.6651	27.9994	28.5146	33.2672	39.3533	41.2106	40.0557	40.7872	44.5325	40.4951
Bolivia	100.004	98.9093	99.4831	103.863	97.5345	95.6769	92.7997	88.2865	83.2515	79.2937	75.877	68.7105	66.8241	65.2808	73.6074	64.6367	64.5877	60.0009	57.8383	59.1374	64.3072
Bosnia and Herzegovina	12.7249	12.7364	12.8917	13.7039	12.9896	12.6705	13.2036	14.3931	11.9236	13.0538	12.2284	10.4467	11.1123	11.875	10.9649	12.6729	13.2611	13.3298	13.3481	13.722	13.8307
Botswana	220.984	189.895	184.151	218.06	164.213	154.497	165.722	165.592	166.723	159.264	131.53	145.57	187.453	152.644	187.816	163.817	203.555	149.22	136.351	137.962	192.832
Brazil	40.1108	39.6521	39.1162	38.4275	37.6052	37.3972	35.7195	36.3913	35.5183	34.5336	34.4874	34.5286	34.0855	33.7378	33.5506	33.137	33.3404	32.367	29.8696	29.1191	28.1914
British Virgin Islands	17.8304	17.6253				63.7843	113.417	48.5913	32.9553	29.8099	19.0451	12.2205	13.9813	11.1025	9.89727	9.7795	8.71433	7.02932	6.33853	6.85665	6.73623
Brunei Darussalam	42.2962	46.224	43.2644	36.9266	46.7099	31.3118	45.3041	58.1207	38.6503	27.1288	21.3056	25.7525	23.758	21.0301	23.2095	18.1766	23.3298	28.3803	30.5894	24.3968	25.452
Bulgaria	10.5231	9.7198	9.96668	10.8151	11.1626	11.4834	10.3833	11.3738	11.162	11.1762	11.0165	11.5314	11.633	11.6317	11.8013	10.4866	10.4709	10.4076	10.5539	10.4559	10.4654
Burkina Faso	27.343	26.9173	26.1102	24.8067	24.1299	23.2551	20.8923	21.7477	21.1419	20.2294	20.0725	20.3592	18.7739	17.9314	17.375	16.4566	15.7071	15.4929	14.1858	13.6706	13.309
Burundi	4.21914	4.16245	4.00793	3.96722	3.94703	3.79342	4.11211	3.91159	4.07156	3.53714	3.61219	3.40682	3.53706	3.17616	3.63413	2.89443	3.52143	3.08505	2.8238	2.67887	2.56233
Cabo Verde	9.07635	9.31015	9.16138	8.44931	10.3742	7.755	7.59116	8.08338	8.56693	8.39025	8.7271	8.46035	7.83127	8.63799	7.36419	7.32874	7.14835	7.37957	8.07693	7.01149	6.78246
Cambodia	14.6287	14.6006	13.1828	13.5351	11.7866	11.5363	10.8644	10.4993	10.3225	9.6966	9.75361	9.36202	8.90508	8.92369	10.5946	10.3241	10.346	9.99317	8.8947	8.91891	8.73316
Cameroon	30.4023	28.6968	27.0288	28.779	20.7454	20.2642	19.303	19.3867	19.6242	19.91	17.616	17.1411	16.7982	16.554	16.5812	17.0791	17.277	16.6876	15.5571	15.4953	15.0297
Canada	91.7214	90.0755	88.5209	90.3765	85.7917	89.0212	82.9154	85.0893	89.2215	84.1316	83.7737	85.4432	82.7525	82.7845	85.2531	81.0906	80.4492	81.7384	79.2636	76.7818	75.2163
Cayman Islands	10.5325	8.42981	9.25741	8.66298	11.7441	17.6002	71.8666	110.189	76.2855	75.9738	32.2205		33.6449	12.8643	12.1674	7.35802	6.67975	7.37222	8.59972	8.30607	7.95152
Central African Republic	173.066	168.697	163.43	161.365	157.284	144.554	142.853	140.595	135.783	135.541	133.174	130.776	112.003	112.004	105.139	114.781	117.623	115.415	106.459	107.164	106.404
Chad										53.5202	53.083	52.0144	47.8652	46.6933	44.1863	43.4258	39.3837	41.7081	42.9767	40.091	37.3434
Chile	31.2872	31.2697	31.3609	32.0755	30.1493	29.9926	28.3759	28.5004	27.9179	27.8727	28.5731	28.4407	28.4182	29.4875	26.6806	28.4764	28.8958	29.3471	28.8425	27.6186	27.4397
China	5.47038	5.45656	5.34627	4.89308	5.49584	5.47945	6.40128	6.57967	6.21148	6.50297	6.4831	6.47724	6.78828	7.36114	6.15653	8.249	8.21167	8.23988	8.59631	8.94569	8.93733
Hong Kong	59.5711	65.887	76.8364	76.2993	72.3548	52.2076	54.7828	51.0755	50.6498	45.4736	42.1074	44.6229	41.9798	35.9313	34.8873	31.621	29.7354	28.7736	36.0593	43.834	41.9477
Macao	21.8574	17.5395	20.1603	18.9112	26.9692	22.3496	20.968	19.4949	18.8683	20.4419	19.9721	19.1249	22.0351	15.762	20.3961	22.0883	16.5272	21.6486	14.4477	20.3185	17.2413
Colombia	23.1025	23.0785	22.7243	22.1534	21.4486	21.1895	20.4954	20.463	20.1289	19.016	19.0491	18.6395	18.5213	17.778	18.7173	18.7594	18.6121	17.1599	17.2208	17.6516	17.4233
Comoros	3.83293	3.68704	3.54026	3.28802	3.81879	2.60334		3.11924	3.43218	3.41116	3.42273	3.72335	3.22781	3.46323	3.0567	8.11855	3.14841	3.08933
Congo Republic	83.1096	79.7537	76.0685	79.485	65.8056	63.8259	62.8432	63.3117	64.8945	61.8008	59.6286	58.3122	57.1236	57.1781	56.5255	54.6618	52.5814	51.3447	56.9624	57.1023	54.0245
Cook Islands	13.7938	13.3037	13.7289	13.2912	13.8028	32.5791	16.8102		14.8709									11.0893		11.3307	10.8261
Costa Rica	13.9118	10.7076	10.4704	13.5324	10.853	10.037	10.0688	10.4476	10.6393	9.69672	9.1751	9.56423	10.2501	9.77848	7.71571	8.82576	8.8055	9.7219	10.2029	9.86748	9.80526
Croatia	12.3354	12.7932	13.6274	12.9301	11.9618	12.8393	13.3016	14.3786	11.343	13.2371	13.8075	13.5085	12.3937	13.1362	11.1908	13.4852	14.3244	13.0148	13.5544	13.4707	12.7836
Cuba	10.6025	10.6845	10.2932	10.2128	10.4592	9.75216	9.31925	10.1223	9.64927	9.99878	10.3595	11.8053	10.2419	11.2551	10.4146	10.8097	10.3571	10.485	11.122	11.0541	10.8422
Curacao											3.95701	3.87576	3.46712	3.5121	3.58096	3.16126	14.2878	13.3737	19.944	25.2535	22.1921
Cyprus	14.5785	14.1431	13.369	14.5675	14.4022	13.7464	26.9024	23.3468	17.8008	15.0646	13.3433	11.9736	11.9204	11.9638	10.1563	10.2387	10.2283	9.67611	8.66088	8.4019	8.59943
Czech Republic	7.88261	8.11866	7.88892	8.19206	7.93804	7.72819	7.9834	8.41255	8.63132	8.90958	8.3359	8.6327	10.723	8.75185	8.67707	8.36697	8.50099	8.36842	8.23913	8.1904	8.34907
Cote d'Ivoire	19.421	18.3104	18.0116	17.6633	16.8551	17.2012	25.1034	21.3858	21.6945	20.1089	14.0124	15.5626	16.7238	14.7592	11.9468	15.1978	16.0921	15.9148	11.4289	11.3051	11.1345
North Korea	5.61806	5.54239	5.45252	5.47427	5.40905	5.41145	5.46598	5.29434		5.25657	5.1862	5.15495	5.04359	4.95533	5.0408	4.98549	4.98046	4.95243	4.90777	4.75648	4.7142
DR Congo	50.2445	47.1539	45.1261	46.9792	39.3873	40.7225	34.2063	33.9032	33.324	31.4851	31.3023	30.3544	27.8504	27.5683	28.2397	24.9457	24.5212	24.2339	23.9797	24.6803	23.9455
Denmark	19.494	17.4356	14.2928	14.4362	13.8374	13.0963	15.9552	18.3952	19.3693	20.1404	19.9093	24.2411	21.0589	20.3861	17.3261	16.1433	14.8783	14.9894	14.0911	13.2572	12.7154
Djibouti	3.59007	3.54627	3.39809	3.36458	3.73657	2.58292	44.2461	44.1796	22.5529	15.3732	11.3409	9.16702	7.24685	3.3321		2.16907	4.36567	5.13672	5.02728	6.00062	6.52861
Dominica	11.1352	11.4529	11.6844	11.0555		13.3801	6.72582	9.85	10.3671	9.50308	11.9182	9.30591	11.0575	11.3558	11.7889	11.2146	11.9621	11.0602	9.18302	11.0987	12.5604
Dominican Republic	7.0667	7.17353	7.20554	6.54405	7.46244	6.8908	5.91666	6.61642	6.58783	5.97044	6.72055	6.51831	7.37186	6.69374	7.00859	6.66944	6.65497	6.70624	7.00913	6.68946	7.17813
Ecuador	17.8281	15.912	16.4726	17.3563	13.3292	13.5676	13.6099	14.5025	14.0602	12.7623	12.6726	12.1501	11.3663	10.0088	13.5041	11.4627	10.2504	9.81859	9.55475	9.3025	8.97037
Egypt	2.10957	2.02106	2.11852	2.28021	2.70784	3.19886	3.47767	3.50328	1.73791	2.27685	2.57579	2.57587	2.9197	4.18981	2.33185	4.34306	3.75307	3.6555	2.5576	3.14364	3.3995
El Salvador	5.55464	5.33874	5.36052	5.08765	5.84956	5.59066	5.15747	5.21562	5.72691	5.12183	4.71478	4.91124	5.07889	4.97649	4.51277	4.32077	4.49207	4.24822	3.96753	3.94644	4.14556
Equatorial Guinea	40.2541	14.4673	11.2439	14.6745	10.6125	19.6075	12.697	9.92955	11.2415	12.3481	9.70875	9.74779	9.80436	10.2039	12.044	15.9393		17.4873	8.2212	11.638	6.09197
Eritrea	22.1158	21.3772	20.8982	21.4567	21.1295	20.8278	20.1535	19.6493	20.0265	19.5536	18.6012	17.6971	17.3929	16.4054	15.5286	15.9955	16.0791	14.9518	14.8823	14.6725	14.6382
Estonia	25.7986	26.4877	28.0005	29.8164	28.932	28.3066	37.3755	38.1074	47.0735	56.3973	50.0861	49.6132	41.2164	23.2327	18.6882	17.5051	15.9261	17.0874	17.3239	16.5984	16.1864
Ethiopia	17.8985	17.4354	16.7881	16.2918	15.9251	15.4064	14.2496	13.9355	13.6613	13.1971	12.9769	12.6486	12.3507	12.3494	12.0187	11.4448	10.9914	10.8117	10.5551	10.2861	10.1441
Fiji	26.2434	25.4278	25.163	26.0595	21.3222	19.2048	21.5994	18.6004	17.229	16.6612	14.2405	20.5517	19.5619	17.6805	12.8126	17.666	19.5175	17.5354	16.9919	16.8392	17.9525
Finland	59.0661	54.7727	53.827	105.179	65.6599	103.981	135.419	135.741	127.32	127.106	132.048	113.791	96.2408	130.937	46.5442	74.3735	75.405	70.1546	86.4634	84.0195	85.2067
Netherlands Antilles	44.0663	45.2449	35.026	28.4889	20.5393	19.0424	11.2512	12.1792	12.656	10.0033	9.48694	9.82841	11.4299	7.94127	9.75054	6.83907	1.98184	0.843013
France	16.6287	16.0417	15.5889	14.812	16.6968	15.8773	16.763	17.2048	16.4361	17.9534	20.3641	14.4443	18.9369	18.8721	16.0441	15.5955	13.8295	12.0912	12.8123	12.6894	12.5576
French Polynesia	17.5105	18.5294	15.7033	15.7997	16.1843	19.1564	16.0265	16.578	17.4944	16.4574	17.2605	24.1419	36.4832	29.4291	21.1192	15.3169	14.3867	24.1039	12.011	10.454	10.3732
Gabon	174.471	173.693	155.097	178.393	121.491	132.39	104.619	109.611	97.7965	105.431	97.0761	94.0061	89.2698	89.0868	77.7451	89.126	89.2258	86.2487	101.791	100.814	95.1629
Gambia									7.33182	7.17136	7.17415	7.07711			6.08866	5.73278	4.94477	4.96758	4.76258	4.85319	4.51022
Georgia	14.1107	14.4337	14.9088	15.6965	13.9055	15.0422	13.3193	13.5511	12.3829	15.8623	16.0306	17.5905	18.7785	16.8274	16.5435	17.8306	20.1352	16.9484	18.8097	17.9215	18.117
Germany	8.67325	8.75207	8.41685	8.09541	9.29071	9.13587	12.2605	11.4316	11.8491	11.8333	10.6169	11.3353	10.5876	10.8381	9.39005	9.73823	10.2673	9.49767	9.63738	9.58378	9.74068
Ghana	13.2539	12.9109	12.632	11.9724	12.0374	10.9453	9.89343	9.90482	10.2779	9.98787	11.7016	11.1377	8.89145	8.64861	8.19739	8.27833	7.65728	7.7051	7.47919	6.73674	6.60534
Greece	14.294	15.2896	14.9828	15.1687	16.5637	17.0768	19.038	19.4209	19.061	18.1941	18.0817	17.7158	18.7747	17.9105	15.6974	14.1219	15.1561	13.0747	12.4406	12.2616	12.3587
Greenland	553.149	559.986	567.589	566.509	577.019	574.161	577.391	581.961	592.998	594.344	601.084	612.445	619.419	633.747	640.051	633.879	634.459	632.236	636.061	637.254	639.362
Grenada	4.49755	5.099	5.30912	5.93646	4.04109	8.84189	6.6041	6.31751	9.11094	9.12071	10.6455	8.45257	10.112	9.15323	7.02477	7.66595	9.23716	7.38282	7.34749	6.0879	6.82612
Guatemala	9.32805	7.58108	7.53514	8.72186	7.25173	6.92101	6.37325	7.07954	7.02294	6.25692	6.7008	6.31344	6.53729	6.55339	6.50726	6.00615	5.91329	6.20158	6.26377	6.21264	6.26374
Guinea	30.2832	29.4527	28.6508	28.0205	27.094	26.9175	25.5156	25.9271	25.8675	25.295	24.2512	23.6556	23.4649	22.0953	22.1843	21.3988	21.2819	20.8601	20.5758	19.9097	19.4305
Guinea-Bissau	28.1422	27.3911	26.3733	26.178	25.2668	23.9624	23.4601	23.7468	23.0125	22.7036	22.1934	21.9477	20.9503	20.5101	20.0179	19.1036	17.952	18.2204	17.6219	16.6964	15.6389
Guyana	134.271	134.218	135.757	135.524	137.687	142.811	135.812	121.158	140.67	143.043	151.717	152.481	156.896	156.878	158.135	162.981	164.66	165.646	135.824	134.204	134.161
Haiti	3.44807	3.30201	3.2347	3.26177	3.16035	3.06191	3.1448	3.16935	2.95562	3.32984	3.25057	3.38556	2.72373
Honduras	15.157	11.8086	10.8606	13.7032	10.6696	11.494	10.5352	11.9962	10.0558	9.46495	8.44769	8.32484	8.46874	8.13691	9.47941	7.73054	8.09616	8.31524	7.37561	7.64833	7.64518
Hungary	8.4692	8.86169	9.02149	9.86021	9.80083	9.51889	9.18588	9.72231	10.2783	10.5678	9.87624	8.81628	8.09981	8.11474	7.25849	7.14737	7.59238	6.8296	6.98744	7.38994	7.49215
Iceland	138.288	128.778	127.072	138.294	129.081	132.83	133.23	99.2771	104.466	103.591	116.145	109.716	106.389	96.289	78.2692	86.5796	83.2514	82.4578	92.9114	95.7314	93.3704
India	3.19096	3.15829	3.09364	2.92299	3.01136	2.97761	2.95361	2.9212	2.88043	2.75196	2.75969	2.77766	2.79684	2.76957	2.74018	2.69789	2.70454	2.62183	2.58276	2.59868	2.5924
Indonesia	7.58914	7.3826	7.43038	6.72139	6.11985	6.48719	6.10388	6.68737	6.92725	6.62819	6.38846	6.89317	7.1415	7.5732	7.89413	8.05191	7.91975	7.76905	7.79285	8.43208	8.3551
Iran	8.93395	8.74009	8.78966	9.26109	8.84124	9.08976	8.30156	8.3941	7.40891	7.36859	7.47784	7.41987	6.79886	7.8014	9.27294	7.57667	7.20774	9.80097	8.47411	8.328	8.01655
Iraq	5.21152	5.18649	4.15007	4.96389	4.72909	4.91192	4.42345	3.85751	4.73086	4.62552	5.26427	5.66975	4.41173	4.76902	6.04875	5.95422	5.53473	4.79053	4.38407	4.26897	4.13608
Ireland	18.1446	18.2834	17.9259	18.0466	19.1214	18.6497	19.4128	16.7311	18.3263	17.3306	15.095	17.0071	16.5705	14.0185	13.4546	11.0242	10.684	11.8949	11.7328	12.481	13.6264
Israel	21.5104	26.3791	23.706	19.3413	24.1603	18.4938	18.47	19.2281	17.4926	20.9425	18.1072	19.8907	17.1275	17.4506	16.0693	21.0421	23.3649	20.0022	17.1384	15.0325	14.9954
Italy	10.8829	10.6004	10.6128	10.9757	12.2524	12.8332	16.0628	15.4141	15.7422	16.7516	15.616	18.1376	16.2812	13.1063	10.8475	10.6337	10.7151	9.28758	9.42552	9.34566	9.39467
Jamaica	5.20199	5.55657	5.42144	5.06122	5.05808	6.29421	6.00205	7.30113	7.40806	10.3177	6.93418	6.63004	6.60954	7.2384	6.14448	6.24953	5.73712	5.90179	6.35283	5.97864	6.76485
Japan	11.2583	11.1921	10.3624	13.3595	11.578	15.115	17.7251	14.3883	15.1666	17.4004	16.3067	14.0856	13.5918	14.1755	9.87917	11.4812	11.3411	10.8465	10.3997	9.84334	9.62372
Jordan	11.3399	10.8828	10.8542	9.10065	7.75837	9.31848	12.9755	11.0727	9.02603	9.75265	10.1372	8.17174	10.2512	7.85365	5.17092	8.03352	4.96998	4.16091	4.98528	5.21792	4.68186
Kazakhstan	108.327	113.358	116.045	119.248	119.765	107.807	108.752	109.923	105.35	108.629	111.089	108.778	108.541	101.771	113.077	107.085	102.958	105.519	109.434	104.364	115.027
Kenya	18.219	17.6726	17.3477	17.0469	16.478	16.2994	15.7593	15.794	15.0282	14.4412	14.3548	14.0665	14.4771	13.5849	13.6527	13.4684	13.4147	12.6389	12.2018	12.304	11.9698
Kiribati	9.43105	9.94682	8.80602	6.93718	7.48808	9.20631		5.72371	2.50869	5.71328		4.20013	7.26804	2.9244	4.65866	4.88411	6.40586	4.35387	3.282	1.67612	3.94321
Kosovo	8.03402	6.71389	6.69937	6.57704	6.83703	7.80138	8.08891	7.81392	8.25062	7.92086	7.48128	7.32101	7.29717	7.29031	7.04243	7.08957	7.10818	6.63629	6.73174	6.6905	6.77805
Kuwait	48.4979	33.2035	31.7211	24.0296	28.0664	26.9542	29.9079	34.5398	75.4614	27.0288	32.7157	30.1734	56.2984	33.1729	35.0107	35.4853	41.4694	27.5967	23.6874	29.3948	26.0114
Kyrgyz Republic	34.2924	34.9582	31.9946	32.9942	29.5812	29.6481	30.1463	31.5096	31.2688	29.3309	30.0862	30.5416	29.9	30.2075	26.4729	27.4456	28.899	28.2798	27.7091	29.6501	29.0028
Laos	42.4307	40.7263	39.2598	39.0155	36.6595	35.6421	34.0596	32.8675	33.4536	31.3468	29.3939	29.2177	27.0961	29.0362	33.0015	30.841	31.4099	30.8274	27.952	27.3223	26.8643
Latvia	22.4378	22.8495	23.9814	24.9847	26.3533	27.1712	21.2318	24.1266	24.4829	32.8348	32.825	34.5308	37.8432	26.5809	21.5088	17.6184	17.4621	21.5367	17.6497	22.0915	21.9073
Lebanon	10.1719	10.7246	11.1839	10.165	12.8363	9.57165	14.0473	13.1409	11.8345	15.1251	16.8852	15.8309	16.3846	15.5053	13.7327	19.109	16.9917	14.021	11.5448	14.338	14.7327
Lesotho	19.1468	18.7574	18.0049	17.6654	17.21	17.9368	18.8507	18.2047	14.3212	14.4642	14.1615	14.5315	15.0608	12.9546	12.8311	12.9362	12.6983	12.9021	12.4845	12.1095	11.4918
Liberia	36.8166	36.3487	34.2116	31.2414	20.8325	21.4646	19.8539	19.3736	15.3243	27.504	26.901	26.4512	24.8553	24.254	23.6435	22.493	19.7629	18.3479	17.988	16.9589	16.405
Libya	21.8616	24.967	23.5915	19.8467	13.9953	12.2534	11.5293	14.4808	11.7186	14.3627	13.0613	9.91217	14.6317	15.5681	19.3909	24.9715	14.8764	21.6243	17.6509	14.7994	15.3685
Liechtenstein				24.9958	27.9928				78.3919
Lithuania	16.7997	18.0891	19.1198	18.4337	19.1793	18.0334	18.8843	18.3989	17.5198	18.3331	17.9915	18.6782	19.2066	18.9543	18.4902	18.7979	19.1033	17.8091	18.8438	18.8048	19.7799
Luxembourg	40.035	33.8491	35.1235	34.8405	33.177		69.6188	56.5852	44.6859	52.1789	39.3142	44.638	64.7857	57.8459	40.5995	55.2326	54.8662	37.6385	42.7203	41.8194	47.1265
Madagascar	40.4843	39.9213	38.0602	38.7519	32.0355	29.5388	28.2871	28.7561	31.0018	28.2024	26.8676	24.2912	25.5604	23.2445	25.9001	23.9369	23.7509	22.8844	22.2174	21.3487	20.6276
Malawi	9.50782	9.78247	9.83038	8.71774	9.5759	9.0756	8.37722	9.75643	7.66782	8.04683	7.92586	7.27338	6.50738	6.76745	6.82529	6.57719	5.60561	5.62499	5.3287	5.24042	4.90942
Malaysia	18.1664	18.5131	17.5469	14.614	14.5153	18.2679	15.6704	15.4344	9.49624	10.3014	9.63514	11.3123	11.0576	10.6851	9.00886	10.2676	10.6879	11.3289	13.2471	13.2433	13.0907
Maldives							2.0078	1.93936	1.30452	1.63017	1.65669	2.25001	3.32024	4.00104	3.97645	3.43879	2.67935	3.81497	4.58285	4.03152	3.03097
Mali	51.1123	50.2948	47.7923	47.3698	45.6481	43.8346	28.1349	26.5655	26.4909	29.3224	31.7596	27.1631	24.9646	26.8715	33.6966	25.0586	24.3386	22.8978	29.0907	28.3416	27.6706
Malta	8.29781	6.93979	6.24455	7.1049	8.28893	6.4384	15.6985	14.8017	11.4467	7.82548	6.62915	6.44996	7.35342	8.27536	9.18066	7.26804	6.45939	9.81217	9.72679	7.99895	8.78972
Marshall Islands	4.93805	4.67116	4.52668		4.21369	3.85423	3.97832	3.9901	3.839	3.82204	4.59864	3.82053	3.66408	3.59594	3.6242	3.62169	3.61083	3.63303	3.55454	3.57236	3.54111
Mauritania	69.4465	65.7054	65.1815	58.984	61.0923	58.9006	56.1361	54.8388	59.2298	56.5666	54.188	54.4552	53.7246	54.1364	50.4313	46.6662	49.9843	45.2308	45.1066	41.0337	39.1334
Mauritius	27.1518	47.0751	38.476	40.7842	51.4046	77.174	93.5651	71.7731	25.3143	58.7872	93.3713	26.6242	20.5923	47.4444	22.2119	35.684	34.7175	45.9284	58.3772	56.0022	42.1509
Mexico	19.3952	19.1729	19.9083	21.0393	19.4318	20.7548	20.2461	19.8398	18.8806	19.1054	18.9787	18.4676	18.3557	18.2671	17.1527	16.6402	16.3116	15.8906	14.7134	14.063	13.5456
Micronesia, Fed. Sts.	9.85782		10.5568	10.4489	10.2255	9.63208	11.1691	10.4696	12.0127	10.9162	10.3918	40.4057	30.9764	15.4756	9.67905	10.455	9.3176	8.02982	8.19506	8.83141	9.08941
Monaco																				84.8357	74.1024
Mongolia	293.406	300.57	263.843	282.723	254.733	254.606	218.252	218.022	191.332	213.537	230.952	179.414	184.96	222.661	140.092	154.776	194.078	223.105	226.681	190.604	198.157
Montenegro	20.8707	18.7611	18.739	20.7133	19.7585	20.0577	18.5174	16.9087	18.322	16.1613	14.9815	17.9124	18.831	22.4196	21.4721	22.5331	23.3524	23.4829	22.9537	22.9891	23.4007
Montserrat	12.3165	11.7249		18.1842	15.7852	23.57	24.5776	29.5958	31.6951	33.5796	21.9299	23.2887	24.5353	28.2097	22.1542	20.3737	20.8172	22.0767	22.6893	22.1313	24.2769
Morocco	7.45813	7.46999	7.38887	7.33149	7.1299	7.34904	7.56379	8.32521	7.49587	8.07584	7.98821	7.71256	8.27584	7.92953	7.8052	7.6552	7.37624	7.10222	6.99815	7.02801	6.86989
Mozambique	46.798	44.2919	43.6277	42.9627	38.69	42.1651	36.4389	34.1587	33.2624	28.8103	33.4667	32.3533	26.87	28.6764	28.6583	24.1861	24.7589	24.8733	24.0754	22.6584	22.1278
Myanmar	14.3133	14.0183	13.7832	13.8147	12.7083	12.067	11.7887	11.6851	12.2528	11.05	10.7059	10.2756	9.81678	10.2412			11.5093	11.3981	10.2604	10.3783	10.245
Namibia	278.243	259.487	255.045	261.361	240.925	238.904	190.142	226.922	216.714	226.21	209.696	219.001	216.65	195.216	206.99	204.416	197.789	192.18	176.121	171.984	176.14
Nauru		28.1287	21.6433	13.3774	14.785		21.7681		19.992			7.67765	6.27718	8.38186	7.51551	17.2901	17.3452	9.78169	22.9395	30.4728	42.5045
Nepal	5.75088	5.75785	5.51127	5.47957	5.4649	5.35382	4.67768	4.67918	5.13582	4.78584	4.81745	4.84621	3.8193	4.53626	4.51958	4.74354	4.76393	4.71165	4.60865	4.65422	4.53841
Netherlands	14.3234	16.023	15.3268	15.7304	16.2485	16.4505	26.1963	21.2711	22.0333	22.7224	22.8226	21.3943	20.8678	22.0611	20.2139	19.2387	18.9844	17.8946	19.1506	19.2596	19.8113
New Caledonia			99.4193	92.7947	93.0855	93.3725	92.9377	91.0058	82.3882	89.4843	89.1508	87.7232	98.8381	96.6418	92.7639	96.7774	91.6371	85.7441	85.6536	79.1848	77.9463
New Zealand	53.3829	48.722	48.1201	48.4263	45.8172	45.3833	44.5662	43.7481	43.0797	39.9438	41.7979	38.4538	40.0555	37.1365	36.9389	39.8357	36.9498	37.8623	41.3664	41.1747	38.9225
Nicaragua	19.716	19.3276	20.5432	20.5466	19.0811	17.4558	16.164	16.5266	15.6735	13.5298	14.59	15.8413	15.6298	15.7969	16.2231	12.4709	12.5404	12.2147	11.081	10.4577	10.7136
Niger	27.263	26.3071	25.9252	26.6532	25.3695	23.3882	21.5858	20.788	19.9262	19.5122	18.9222	19.2196	19.1492	16.7518	16.2663	16.2763	15.4925	15.7612	14.0826	14.4179	14.338
Nigeria	8.04501	7.95522	7.53325	7.64312	7.10546	6.56234	6.56202	6.64332	6.88727	6.33123	6.2586	5.67906	6.22126	5.85181	6.02779	5.65027	6.14323	4.35436	5.11739	4.84517	4.61642
Norway	59.99	61.1017	61.4727	69.9178	61.0619	67.4602	66.6808	69.1124	62.2109	61.574	61.9833	59.663	55.9942	55.2524	50.8869	52.804	51.2626	51.4431	44.5063	42.3298	40.2449
Oman	18.5019	15.691	16.5329	17.031	16.1283	14.9968	14.5882	12.0831	14.3638	12.0686	13.1481	13.2284	21.2511	22.6248	12.0687	11.7248	10.4978	9.78608	9.00955	10.1836	8.83889
Pakistan	4.75939	4.59513	4.4884	4.42059	4.32315	4.14086	3.7294	3.43399	3.63764	3.85175	3.90452	3.93184	3.75847	3.98553	3.71809	3.55958	3.14861	3.33336	3.32699	3.4197	3.37587
Palau	70.7765			48.4638		39.2831	22.9514	21.4355	20.4642	21.6886	32.4748	28.5946	31.8359	33.7383	38.5725	26.984	26.2274	18.6757	17.6163	18.412	22.0555
Panama	22.5513	22.4868	21.3129	21.8532	21.5138	22.0727	15.1534	16.074	13.2513	15.4294	13.525	13.6476	13.5545	14.1433	13.9664	14.3769	14.4416	14.8093	16.5915	17.0041	17.0038
Papua New Guinea	78.3755	74.3154	71.3578	82.0627	64.4559	61.6941	57.7742	56.654	44.1787	46.5823	43.0662	41.0644	37.2581	36.6559	36.3512	48.2971	49.0446	50.1591	46.1462	43.5246	40.1526
Paraguay	58.4556	48.3807	48.6198	53.6586	46.5737	49.6507	43.9191	37.0936	38.492	37.4616	34.132	32.3339	30.4269	34.2759	33.1633	34.5294	35.495	35.6269	33.7574	37.0648	36.7161
Peru	35.4679	34.9911	34.4541	34.1534	32.7906	32.409	31.1564	31.057	31.6693	30.1168	29.1522	28.4727	29.1999	29.0441	29.4644	28.1624	27.875	28.6722	29.6885	29.3978	28.4431
Philippines	5.47284	5.99531	6.25981	5.66575	5.66766	5.62028	4.64644	4.78924	4.19816	3.88504	3.7499	4.29344	3.73413	3.73752	3.60727	3.58735	3.66422	3.73639	3.59264	3.66409	3.75435
Poland	7.8716	8.16036	8.30346	8.63559	8.54115	8.91723	9.16365	8.4415	8.30813	8.50507	8.92896	8.80988	8.95607	9.19817	8.2511	8.40839	8.37419	8.02441	7.60616	7.98236	8.15468
Portugal	16.8335	26.9583	39.4926	20.6603	58.8481	54.0036	80.7867	66.0969	40.135	50.4853	40.3627	50.8856	31.2898	33.229	25.4558	22.8851	20.4606	17.193	19.2607	17.5888	17.6426
Puerto Rico	26.3039	26.3845	25.1156	24.2947	26.6059	21.7427	30.6722	28.6043	28.056	34.5444	30.913	25.7249			29.4148			23.8389	19.4426	19.0055	27.933
Qatar	22.889	17.0179	18.7738	12.3857	10.4726	52.9873	84.1461	19.0788	53.85	15.5674	21.1611	51.2551	27.4627	22.5471	22.2312	28.1685	37.8712	41.8623	33.4084	31.9261	32.0431
South Korea	11.3969	12.6821	12.1007	14.3788	12.3154	21.5622	15.4537	16.1789	14.1853	15.6863	14.8786	17.1893	16.1541	15.8097	11.1984	14.7982	15.7924	14.3953	15.1233	14.4079	14.089
Moldova	5.86131	6.30644	6.64462	6.69332	5.97456	6.76681	6.11916	5.48157	7.35106	7.18278	6.36936	6.7477	7.05907	7.64654	6.37298	6.2237	6.6638	6.45276	6.24526	6.34132	6.48947
Romania	9.56866	9.79035	9.8196	10.0292	9.66319	9.06099	8.76097	9.02704	9.99303	9.85394	10.2303	10.2629	10.1652	10.2937	9.99125	10.5447	10.1927	10.0765	9.45949	9.31075	9.22574
Russia	67.4112	67.1488	67.6442	60.7881	64.6583	51.8593	52.0938	49.1189	55.4623	53.1629	52.3134	52.9816	50.9228	52.9821		56.8443	53.9369	59.3631	57.0304	55.0625	49.3287
Rwanda	5.00985	5.13665	5.27136	4.01923	3.71069	3.26199	3.03675	3.60447	3.04161	3.0743	3.33713	2.87363	2.91933	2.89648	3.18992	2.89247	3.06157	3.20541	2.93164	2.87132	2.82514
St. Kitts and Nevis	6.79685	7.26851	7.05314	7.58402	5.63482	9.17228	7.25945	7.38935	11.0458	11.9941	7.38994	10.5439	8.80641	9.67522	10.6729	7.5889		6.49422	8.20865	7.03357	7.95976
St. Lucia	7.70483	13.7438	13.986	7.61792	4.88978	9.60723	4.52957	4.06476	9.36375	7.24395	8.32872	6.60414	7.88652	5.61689	4.37276	5.99271	6.03222	5.39541	6.72804	5.05253	5.60652
Samoa	17.0791	17.0906	16.5174	16.7917	16.8443	15.5416	15.5335	18.7148	15.6198	15.1911	15.0888	15.5194			16.3651	16.2353	17.7482	15.3574	15.0299	14.6507	15.9206
San Marino									54.38	65.5278	45.3558	322.791	109.567	111.539	46.4213	43.8055	38.2137	47.7629	21.1673	17.5066	17.0132
Sao Tome and Principe	8.67698	8.66555	7.95531	7.26239	7.07183	7.57029	6.20425	7.25257	7.05629	8.99851	6.55432	7.24071	5.96861	6.67918		8.22881	5.87394	5.45765	5.88811	5.70398	5.68876
Saudi Arabia	7.86309	8.29357	8.13457	7.80626	17.9616	18.7522	13.1723	23.3443	21.0253	17.7165	19.1204	28.314	27.3671	20.4847	17.3985	18.8814	17.5052	11.0617	10.696	10.1735	9.38368
Senegal	21.2797	20.9472	20.5321	20.0252	19.8897	19.1227	21.6974	26.0979	20.6093	20.971	22.9637	21.2973	23.4785	22.5044	15.3303	19.3641	16.4418	17.0881	12.925	12.7939	12.3977
Serbia	12.5528	14.1378	14.3127	13.5107	12.6895	11.5668	10.6579	10.8373	10.6837	11.9951	10.7249	12.282	11.4832	13.1709	11.6118	11.4773	11.1942	11.0878	11.5925	10.2396	10.3638
Seychelles	29.1822	38.6841	37.9974	37.4848	33.9582	18.5454	33.0821	32.9361	33.3511	20.1732	20.3661	37.7683	16.3308	17.3094	21.4859	22.3044	21.8437	25.0588	36.041	40.5773	40.2016
Sierra Leone	15.5699	15.8805	15.9274	15.6324	15.4314	15.0332	14.5818	13.8947	12.9382	12.0197	11.8365	11.4649	11.0739	10.8904	10.4523	9.4736	9.24471	8.70581	7.79956	7.62561	7.44769
Singapore	30.1697	30.8931	29.61	28.5719	26.5634	29.0971	34.2077	31.9732	30.8703	31.0945	33.447	36.303	32.1976	30.458	24.233	28.8863	29.136	43.5918	28.6576	26.5969	27.8681
Sint Maarten											0.517397	0.60748	0.979328	0.53732	0.514723	0.874652	34.5608	44.9128	41.7829	37.9474	35.8965
Slovakia	8.15443	9.83188	10.0895	9.77778	9.75394	9.35913	9.76982	8.80568	10.9499	8.62887	8.35281	8.49444	9.38164	9.48155	7.49873	7.56901	7.77673	7.5246	7.20452	6.88169	6.93025
Slovenia	12.5525	12.5586	11.851	13.2353	14.0751	15.0302	13.4286	12.8195	17.2403	26.8898	26.1081	41.0588	31.1927	20.9932	23.2474	16.5749	14.0065	13.603	13.1921	11.6967	11.8233
Solomon Islands	64.2832	62.3848	60.8119	58.3921	55.7326	55.1124	53.2533	50.6783	25.8904	31.6159	48.4024	28.5406	38.0784	21.6208	20.4236	33.2851	34.8498	29.626	32.1633	31.8587	32.7825
Somalia	75.3895	73.6014	71.3859	68.9528	65.6083	62.6821	62.2676	60.2779	58.9015	56.5422	54.4086	53.2152	51.8207	50.2998	48.4251	46.677	45.4596	44.2118	42.3752	42.339	41.2083
South Africa	27.2522	27.0128	26.4416	26.0097	25.5573	26.4154	29.4364	28.7431	24.32	24.2935	23.0791	23.3049	22.9657	19.8857	20.206	19.8017	19.4593	19.3175	18.1662	17.5551	17.2169
South Sudan																	0.00692679
Spain	15.2658	15.6719	15.3655	16.0224	16.4045	16.6584	16.6506	21.1273	17.0781	16.8349	16.3287	15.1809	14.349	14.1067	12.9376	12.1303	12.2498	11.9882	11.3538	10.9466	11.1391
Sri Lanka	3.86115	3.63069	3.67533	4.12037	3.65768	3.77957	3.4988	3.26093	2.84706	2.90806	2.84146	2.85986	2.85439	3.01511	2.99991	3.12478	3.72642	3.58935	4.83963	3.63128	3.85098
St. Vincent and the Grenadines	4.43299	4.51824	4.89073	5.25543	4.43438	5.31943	4.37683	3.42181	4.40631	10.0021	8.59029	5.58433	9.79245	6.19818	6.95374	6.67882	5.2002	6.42342	6.24172	7.04312	7.35739
Palestine	3.00998	2.44126	2.50052	2.45458	3.50002	10.9887	25.8136	12.3103	18.5565	5.55144	4.1014	2.19199	1.05469	1.57197	0.961277	1.15505	1.29862	1.47295	1.41	1.48619	1.42163
Sudan	60.2582	58.2828	57.1006	56.3223	47.9818	45.5978	49.4625	43.4452	43.5385	40.2448	40.3669	39.65	37.8036	35.9065	39.3528	35.6686	35.2579
Suriname	83.0724	67.6817	61.843	65.3417	64.8706	78.1325	63.2193	67.1658	79.9846	76.6507	65.6659	56.9942	58.426	57.9354	55.1558	56.1993	57.0177	56.7322	64.6518	63.8471	64.3734
Swaziland		17.6289	17.0175	17.9281	15.9222	18.507	18.8043	21.1107	14.7841	14.7937	14.057	14.5529	15.6785	13.7263	12.9651	13.1963	13.8356	12.8896	11.9848	11.2385	11.5773
Sweden	43.8038	43.9444	42.4417	55.1437	41.4354	61.5151	36.4816	33.8925	46.2284	47.918	43.7104	40.8489	42.3002	43.3739	33.63	39.1787	40.9498	39.6359	43.4487	42.9072	43.3127
Switzerland	8.91095	9.36864	8.26929	7.83881	8.47556	7.163	12.986	13.5255	12.1421	11.2207	10.6247	11.1118	9.94173	10.7001	8.95384	8.8452	10.3826	9.62126	10.7143	8.78882	8.76397
Syria	4.52795	4.12006	3.90926	4.10244	4.69086	4.62863	4.91158	4.44074	5.46465	4.0149	4.67924	4.08133	3.81363	5.01023	4.81852	4.33912	4.1234	3.51168	3.81589	3.54961	3.54709
Macedonia	12.6422	12.5187	12.2455	12.0837	11.4997	12.0787	11.3947	12.2383	11.7107	12.551	11.5184	10.8956	10.743	11.3213	12.1485	11.8454	11.3413	11.2866	11.5373	11.5353	11.546
Tajikistan		13.4159	13.1859	14.1543	12.0285	12.5527	16.3338	15.0698	13.5355	14.9373	15.4205	13.4146	14.1083	13.0717	12.8989	12.7154	15.3638	13.1964		13.0249	12.3037
Thailand	8.02896	8.01055	7.55014	7.20775	8.08185	8.08529	7.94076	8.10855	7.83942	7.71952	9.65396	7.97315	7.94754	8.04079	7.3095	7.28293	7.34976	7.60534	7.59492	7.32794	7.0619
Timor-Leste	17.3882	17.676	17.7245	18.1429	17.9479	32.9908		17.2415	16.1085	12.9634	13.1046	11.7765	12.1912	12.6105	13.2518	11.9029	9.64112	9.4225	11.5817	9.39319	8.90008
Togo	12.5983	12.1401	11.8852	11.523	10.8666	10.4974	9.42128		9.811	9.65001	9.08678	8.78242	8.27295	8.08826	7.91403	7.45991	7.21335	6.5661	6.69514	6.37946	6.27117
Tonga	9.16793	10.0593	8.35789	8.15611	7.30311	6.42525	5.37271	4.09424	3.71312	3.07166	2.74086	2.82366	4.58596	3.9087	4.22502	3.90873	5.06436	3.80347	3.35673	3.36403	4.22462
Trinidad and Tobago	9.51695	12.5511	14.9808	12.4147	8.09814	8.25237	7.59345	10.82	9.49605	8.83141	8.91221	8.65814	11.0624	9.95267	8.37729	7.96393	8.60444	8.77518	10.5245	10.904	14.616
Tunisia	8.29255	7.95718	7.84361	7.49654	7.50578	7.82219	8.27939	11.0659	8.34277	9.18256	9.37069	8.96066	12.1953	10.2685	8.00223	8.73234	8.34898	7.84512	7.28291	7.31647	7.10254
Turkey	13.6827	14.0331	13.8834	14.4025	13.542	14.7013	12.9739	13.7084	13.6869	14.6548	14.271	14.3456	14.6641	14.9133	12.3009	13.7047	14.7883	14.0158	13.2301	12.525	12.407
Turkmenistan	19.4476	19.104	26.611	25.5543			23.9233	24.5146	24.9892	23.3518	20.3584	17.3811	24.5241	23.3264	17.4097	17.967	17.7232	17.1665	17.1321	19.2424	16.4763
Turks and Caicos Islands	25.3845			18.9747	20.5041	21.8086	36.3734	33.8329	25.0655	167.119	199.238	202.483	345.97	501.363	317.805	195.968	63.9953	121.914	66.6431	62.3635	45.1953
Tuvalu			3.18399	4.47202		7.61687			3.30533	3.65457	3.76574	2.24421	10.63	3.03652	4.12057		3.3533				3.25161
Tanzania	28.0203	27.6283	27.1241	26.7599	26.1305	25.0326	23.1641	22.6784	21.0743	21.1663	20.4659	20.0298	18.7157	18.5238	17.7313	16.8484	16.5256	16.16	15.8189	14.7303	14.057
Uganda	9.7332	9.41866	9.00169	8.89407	8.55189	8.31051	7.78753	7.69729	7.37049	7.02498	6.91388	6.78231	6.16508	6.04811	5.88875	5.59685	5.41231	4.9498	4.70535	4.68857	4.55625
Ukraine	8.67073	8.12964	8.66018	9.21314	7.28809	8.51794	7.90887	7.60525	9.30642	7.60095	7.25411	7.35603	7.70132	7.38219	6.75914	7.1051	7.57303	7.50119	7.52334	7.03036	6.4828
United Arab Emirates	44.4995	43.8272	45.8741	36.3953	37.4948	42.6926	35.1617	35.1313	32.9089	36.3135	33.9433	27.6112	29.9966	26.1142	21.7011	22.4705	21.5892	21.1526	22.0583	22.3839	22.6488
United Kingdom	10.9713	11.2862	11.6457	11.3021	12.1598	11.3038	12.5351	11.9028	11.5712	11.3834	12.964	12.8226	11.1403	10.3968	8.68747	9.1625	8.12552	7.84472	7.96703	7.94889	7.90303
United States	30.1959	30.1888	29.6256	29.1514	31.2006	30.1502	30.1938	30.41	28.8814	29.5358	29.2354	28.9202	27.4239	26.0364	25.4511	25.0176	23.6355	23.9051	24.3417	24.4464	24.441
Uruguay	45.2098	39.6665	38.7512	44.1966	39.0677	42.553	34.1316	34.4674	29.8415	30.1297	36.213	37.0075	31.7036	33.9796	29.6313	29.9783	33.0887	35.0017	40.7744	35.4803	34.1689
Uzbekistan	7.82777	8.33233	8.35962	8.2449	7.02744	8.20332	7.93245	7.10741	6.50936	6.59627	7.08017	7.02513	7.59855	7.57157	5.92206	6.27251	7.21601	6.67734	6.4248	6.71773	6.52905
Vanuatu	60.495	58.1598	55.3129	57.0278	57.201	56.4794	49.1888	51.0371	41.6998	50.7879	36.2602	23.0312	47.2115	36.854	40.9384	44.2439	31.7685	27.175	27.0289	28.5231	27.7282
Venezuela	28.0257	26.676	26.902	27.4982	26.5061	26.2854	27.5395	25.0031	24.7292	26.394	25.6095	26.5346	28.9751	30.6682	30.828	28.8639	25.7117	30.3712	31.7118	34.774	31.5806
Vietnam	3.83706	3.60944	3.49151	3.61449	3.32971	3.37582	3.618	3.73348	3.5858	3.56016	3.55693	3.66769	4.26713	4.15872	4.34264	4.13451	4.47422	4.19937	4.67534	5.87996	6.50625
Yemen	6.31199	6.01048	5.92363	5.92204	4.30079	4.43748	5.04542	5.04874	5.36876	5.45094	6.11773	6.49122	6.22235	5.93917	4.86727	4.92893	4.79705	4.81737	4.67481	4.70852	4.34295
Zambia	74.3614	73.3176	69.2182	72.9116	67.9171	64.826	57.0983	60.9469	58.9557	55.4256	55.298	54.4761	51.714	51.2292	49.1867	46.6595	42.3254	38.2433	40.4494	34.1357	34.2354
Zanzibar	2.92252	2.85976	2.70804	2.8567	2.67122	2.76143	2.81573	2.37983	2.67727	2.39903	2.44778	2.56511	2.33067	2.16843	2.21087	2.1553	2.0323	2.11434	2.23754	2.183	1.84544
Zimbabwe	30.2875	28.6357	29.0632	26.1701	27.685	24.4703	22.8286	25.9758	28.5611	27.4262	28.668	29.3144	28.0277	28.348	30.5847	27.1652	29.0731	26.464	28.4174	27.6257	25.8007
Taiwan	28.5729	30.4534	30.299	31.6905	18.3905	38.5265	15.4537	15.6046	16.923	20.1029	19.5864	18.999	38.2746	16.7949	13.8986	16.4273		16.1594	16.0626	13.4999	50.674
World	15.5568	15.4333	15.232	15.0358	14.8244	14.5705	14.4216	14.3225	14.1547	14.1213	13.9667	13.8136	13.6462	13.4954	11.7058	13.1063	12.9052	12.7078	12.5462	12.4153	12.2708

## Sheet: LandUse_pc_growth
Country Name	1995	1996	1997	1998	1999	2000	2001	2002	2003	2004	2005	2006	2007	2008	2009	2010	2011	2012	2013	2014	2015
Afghanistan	N/A	N/A	N/A	N/A	N/A	N/A	N/A	N/A	N/A	N/A	N/A	N/A	N/A	N/A	N/A	N/A	N/A	N/A	N/A	N/A	N/A
Albania	1	1.01803	1.01394	1.04273	1.03517	1.02763	1.02355	1.26202	1.27281	1.34733	1.36056	1.37115	1.39306	1.32276	1.19239	1.26611	1.34441	1.21336	1.23982	1.21074	1.21735
Algeria	1	1.00453	0.972312	0.943581	0.931899	0.852627	0.884239	1.05738	0.957458	0.981714	0.941141	0.857023	0.801543	0.881517	0.881664	0.765999	0.761124	0.7586	0.816157	0.843006	0.803867
Andorra	1	0.964005	1.04322	1.08346	1.06573	0.981856	0.883291	0.907374	0.921525	1.02545	0.990873	1.10149	1.41446	1.02856	0.892359	1.14001	1.07057	0.973279	0.852071	0.893361	0.88675
Angola	1	0.834894	0.90393	0.8857	0.837918	0.875954	0.480268	0.504667	0.820439	0.694455	0.736582	0.695888	0.696564	0.691471	0.70714	0.640369	0.61411	0.537337	0.600513	0.584043	0.48121
Anguilla	1	1.3584	1.12974	1.3446	0.582198	1.1245	0.714719	0.877716	0.640348	N/A	0.612061	1.04924	0.870676	1.05543	0.707247	0.910646	0.515476	0.503454	0.584485	0.616409	0.566016
Antigua and Barbuda	1	1.01707	0.838159	1.03971	0.504709	0.697414	0.563395	0.926151	0.98232	1.48352	0.719197	0.699318	0.76018	0.773809	1.2916	1.42378	0.868127	1.90929	0.638217	0.628262	0.697958
Argentina	1	0.991339	0.979238	0.972255	0.956562	0.940827	0.913392	0.775812	0.790822	0.734341	0.732574	0.74129	0.74161	0.729524	0.731323	0.728847	0.716179	0.721213	0.705643	0.689703	0.683196
Armenia	1	1.04135	1.08591	1.08607	1.07149	1.09614	1.1462	1.30424	1.14029	1.17323	1.16932	1.35086	1.51708	1.44269	1.17902	1.47896	1.55721	1.33148	1.29683	1.27026	1.29619
Aruba	1	1.22595	1.10392	0.594489	1.18442	0.838972	0.725043	0.486711	0.414193	0.512818	0.437645	0.405555	0.436366	1.39743	1.9092	2.54262	1.03127	0.625101	0.494782	0.37651	0.359139
Australia	1	0.971814	0.976506	0.976783	0.965519	0.873405	0.831496	0.842116	0.921363	0.86959	0.82708	0.803374	0.783156	0.674404	0.760784	0.603694	0.565053	0.613976	0.553391	0.464995	0.41406
Austria	1	0.948632	0.917267	1.00668	1.01217	1.08731	0.952336	0.975854	0.975488	1.00042	0.926293	0.895341	0.851258	0.821623	0.827536	0.865727	0.838787	0.826133	0.886529	0.846139	0.832219
Azerbaijan	1	1.03511	1.01811	1.0514	1.12343	1.02446	1.01974	1.12675	1.18974	1.29646	0.997142	1.02237	1.03234	0.918655	0.887208	1.17542	1.28134	1.06782	1.20647	1.19278	1.28518
Bahamas	1	1.03277	1.07603	1.10287	1.00359	0.993811	0.97699	0.835354	0.853094	0.916404	0.886167	0.884736	0.834832	0.798382	0.854143	0.810623	0.763512	0.838825	0.838556	0.820645	0.787098
Bahrain	1	0.687004	0.666723	0.427728	0.534955	0.657258	0.780959	0.846696	0.513403	0.821026	0.621251	0.406678	0.375359	0.970072	0.98798	0.862293	0.651431	0.580146	0.331635	0.338124	0.293108
Bangladesh	1	0.984361	0.960278	0.961307	0.906624	0.862966	0.838227	0.875547	0.975746	0.857752	0.862559	0.966993	1.03272	0.857943	0.926799	0.90122	0.914572	0.834461	0.875838	0.87583	0.923502
Barbados	1	1.50378	1.63309	1.22421	0.84829	1.08534	1.11132	1.20962	1.57686	1.57498	1.27215	1.19854	1.15664	1.32203	2.28455	1.50045	1.41349	1.73813	0.871848	0.80717	0.914457
Belarus	1	0.998556	0.969538	1.08542	1.0525	1.09347	0.761221	0.904626	0.902628	0.961659	0.805292	0.901007	0.840191	0.846469	0.746686	0.907643	0.831318	0.794242	0.877028	0.903553	0.88775
Belgium	1	0.832046	0.687992	0.862519	0.659448	0.575846	0.784178	0.670049	0.626563	0.642302	0.596863	0.567899	0.848989	0.844826	0.684699	0.836494	0.83002	0.778553	0.778984	0.746067	0.755229
Belize	1	0.912938	1.04312	0.913142	1.08416	0.974889	0.8736	0.842605	0.874081	0.712284	0.868392	0.791799	0.752714	0.759327	0.777341	0.573937	0.582059	0.534761	0.524267	0.503323	0.497824
Benin	1	0.947393	0.893825	0.887258	0.854377	0.825041	0.764281	0.742798	0.769142	0.714199	0.689314	0.678758	0.635776	0.648708	0.607839	0.558405	0.545586	0.502545	0.486585	0.499176	0.479689
Bermuda	1	0.507424	0.583938	0.696928	0.539287	2.8547	8.19106	14.7463	1.94986	0.95272	N/A	0.434763	0.359492	0.340984	0.334641	0.244657	0.254636	0.240926	0.291077	0.289262	0.275984
Bhutan	1	1.01407	0.996575	0.978609	0.829425	0.934419	0.919324	0.90648	0.84484	0.866051	0.782774	0.521998	0.461569	0.470064	0.54841	0.648739	0.679356	0.660317	0.672377	0.734118	0.667561
Bolivia	1	0.989053	0.994791	1.03859	0.975305	0.95673	0.927959	0.882829	0.832482	0.792904	0.758739	0.687077	0.668214	0.652781	0.736044	0.646341	0.64585	0.599984	0.578359	0.59135	0.643046
Bosnia and Herzegovina	1	1.0009	1.01311	1.07693	1.0208	0.995722	1.03761	1.13109	0.937029	1.02584	0.960978	0.820961	0.873267	0.933211	0.861687	0.995907	1.04214	1.04753	1.04897	1.07836	1.0869
Botswana	1	0.859316	0.83332	0.986768	0.743097	0.699132	0.749926	0.74934	0.754454	0.720701	0.595201	0.658735	0.848265	0.690746	0.849906	0.741307	0.921129	0.675251	0.617019	0.624305	0.872604
Brazil	1	0.988563	0.975204	0.958034	0.937533	0.932348	0.89052	0.907268	0.885505	0.860954	0.859803	0.86083	0.849783	0.841116	0.836447	0.826135	0.831206	0.806938	0.744676	0.725967	0.702839
British Virgin Islands	1	0.988496	N/A	N/A	N/A	3.57728	6.36085	2.7252	1.84827	1.67186	1.06812	0.685374	0.784128	0.622672	0.555079	0.548473	0.488734	0.394232	0.35549	0.384548	0.377795
Brunei Darussalam	1	1.09286	1.02289	0.873046	1.10435	0.740296	1.07111	1.37413	0.913799	0.641401	0.503722	0.608861	0.561706	0.497209	0.548737	0.429745	0.55158	0.670989	0.723217	0.576808	0.601754
Bulgaria	1	0.923666	0.947128	1.02775	1.06077	1.09126	0.986721	1.08085	1.06072	1.06207	1.04689	1.09582	1.10547	1.10536	1.12147	0.996534	0.995043	0.989027	1.00293	0.993615	0.994516
Burkina Faso	1	0.984433	0.954913	0.907242	0.882489	0.850497	0.764084	0.795366	0.773212	0.739838	0.734099	0.744586	0.686606	0.655796	0.635445	0.601856	0.574448	0.566613	0.51881	0.499968	0.486743
Burundi	1	0.986564	0.94994	0.940291	0.935506	0.899098	0.974632	0.927104	0.96502	0.838354	0.856143	0.807466	0.838335	0.752797	0.861344	0.686023	0.834633	0.731204	0.669283	0.634931	0.60731
Cabo Verde	1	1.02576	1.00937	0.930915	1.143	0.854418	0.836367	0.890599	0.943874	0.924408	0.961521	0.932132	0.862822	0.951704	0.811361	0.807455	0.78758	0.813055	0.889887	0.772501	0.747267
Cambodia	1	0.998078	0.90116	0.925244	0.805717	0.788605	0.742679	0.717718	0.705634	0.662847	0.666744	0.639975	0.60874	0.610012	0.724234	0.705743	0.707242	0.68312	0.60803	0.609685	0.596987
Cameroon	1	0.943903	0.889038	0.946607	0.682364	0.666537	0.634919	0.637672	0.645484	0.654884	0.579431	0.563811	0.552531	0.544498	0.545394	0.561769	0.56828	0.548894	0.511708	0.509676	0.494361
Canada	1	0.982055	0.965106	0.985337	0.935351	0.97056	0.903991	0.927692	0.972745	0.917252	0.913349	0.931551	0.902216	0.902564	0.929479	0.884097	0.877103	0.891159	0.864178	0.83712	0.820052
Cayman Islands	1	0.800359	0.878934	0.822496	1.11503	1.67103	6.82329	10.4617	7.24284	7.21325	3.05914	N/A	3.19438	1.22139	1.15522	0.698599	0.634201	0.699947	0.816491	0.78861	0.754948
Central African Republic	1	0.974753	0.944321	0.93239	0.908805	0.835254	0.82542	0.812375	0.784573	0.78317	0.769495	0.755642	0.647168	0.647173	0.607506	0.663219	0.679641	0.666882	0.615132	0.619204	0.614816
Chad	N/A	N/A	N/A	N/A	N/A	N/A	N/A	N/A	N/A	N/A	N/A	N/A	N/A	N/A	N/A	N/A	N/A	N/A	N/A	N/A	N/A
Chile	1	0.999441	1.00236	1.0252	0.96363	0.958622	0.906948	0.910927	0.892311	0.890866	0.913253	0.90902	0.908301	0.942479	0.852765	0.910162	0.923566	0.93799	0.921861	0.882744	0.877027
China	1	0.997475	0.977312	0.894469	1.00465	1.00166	1.17017	1.20278	1.13548	1.18876	1.18513	1.18406	1.24092	1.34564	1.12543	1.50794	1.50112	1.50627	1.57143	1.6353	1.63377
Hong Kong	1	1.10602	1.28983	1.28081	1.2146	0.876392	0.91962	0.857387	0.850242	0.76335	0.706843	0.74907	0.7047	0.603166	0.585642	0.530812	0.499158	0.483013	0.605316	0.735827	0.704163
Macao	1	0.802449	0.922354	0.865205	1.23387	1.02252	0.959307	0.891912	0.863245	0.935239	0.913742	0.874982	1.00813	0.721127	0.933144	1.01056	0.756134	0.990443	0.660995	0.929593	0.788806
Colombia	1	0.998961	0.983628	0.958917	0.928407	0.917193	0.887149	0.885745	0.871286	0.823114	0.824546	0.806817	0.801699	0.769525	0.810182	0.812008	0.805631	0.74277	0.745407	0.764055	0.754174
Comoros	1	0.961938	0.923645	0.857834	0.996312	0.679205	N/A	0.813802	0.895447	0.889962	0.892982	0.971412	0.842126	0.903546	0.797485	2.11811	0.821411	0.805997	N/A	N/A	N/A
Congo Republic	1	0.959621	0.91528	0.956388	0.791793	0.767972	0.756149	0.761785	0.780831	0.743606	0.71747	0.70163	0.687329	0.687984	0.680132	0.657707	0.632675	0.617795	0.685389	0.687072	0.650039
Cook Islands	1	0.96447	0.995297	0.963566	1.00065	2.36187	1.21868	N/A	1.07809	N/A	N/A	N/A	N/A	N/A	N/A	N/A	N/A	0.803931	N/A	0.821435	0.784855
Costa Rica	1	0.769673	0.752623	0.972723	0.780127	0.721472	0.723758	0.750982	0.764767	0.697011	0.659517	0.687488	0.736792	0.702889	0.554615	0.634406	0.63295	0.698822	0.733398	0.709286	0.704813
Croatia	1	1.03711	1.10474	1.04822	0.969714	1.04085	1.07833	1.16564	0.919549	1.0731	1.11935	1.0951	1.00473	1.06492	0.907217	1.09321	1.16125	1.05508	1.09882	1.09204	1.03634
Cuba	1	1.00773	0.970832	0.963248	0.986486	0.919798	0.878967	0.954712	0.910094	0.943059	0.977082	1.11345	0.96599	1.06155	0.982279	1.01954	0.97685	0.988917	1.049	1.0426	1.02261
Curacao	N/A	N/A	N/A	N/A	N/A	N/A	N/A	N/A	N/A	N/A	N/A	N/A	N/A	N/A	N/A	N/A	N/A	N/A	N/A	N/A	N/A
Cyprus	1	0.970134	0.917038	0.999246	0.987904	0.942922	1.84535	1.60145	1.22103	1.03334	0.915271	0.821315	0.817671	0.820643	0.696661	0.702313	0.701599	0.663724	0.594085	0.576321	0.58987
Czech Republic	1	1.02995	1.0008	1.03926	1.00703	0.980411	1.01279	1.06723	1.09498	1.13028	1.05751	1.09516	1.36033	1.11027	1.10079	1.06145	1.07845	1.06163	1.04523	1.03905	1.05918
Cote d'Ivoire	1	0.942816	0.92743	0.909494	0.867882	0.885702	1.29259	1.10117	1.11706	1.03542	0.72151	0.801329	0.861122	0.759963	0.615151	0.782545	0.828594	0.819467	0.588485	0.582109	0.573325
North Korea	1	0.986531	0.970534	0.974405	0.962797	0.963224	0.97293	0.942378	N/A	0.935655	0.923131	0.917567	0.897746	0.882036	0.89725	0.887405	0.88651	0.881519	0.87357	0.846641	0.839115
DR Congo	1	0.938488	0.898129	0.935012	0.783913	0.810486	0.680797	0.674764	0.663237	0.626637	0.622999	0.604134	0.554297	0.548683	0.562046	0.496485	0.488038	0.482319	0.47726	0.491203	0.476579
Denmark	1	0.894405	0.733191	0.740545	0.709826	0.671812	0.818467	0.943635	0.9936	1.03316	1.0213	1.24351	1.08027	1.04576	0.888788	0.828114	0.763224	0.768924	0.722844	0.680065	0.652273
Djibouti	1	0.987801	0.946525	0.93719	1.04081	0.719464	12.3246	12.3061	6.28202	4.28216	3.15896	2.55344	2.01858	0.928144	N/A	0.604188	1.21604	1.43081	1.40033	1.67145	1.81852
Dominica	1	1.02854	1.04932	0.992844	N/A	1.2016	0.604016	0.884584	0.93102	0.853429	1.07032	0.835722	0.993027	1.01981	1.05871	1.00713	1.07426	0.993266	0.824686	0.996721	1.12799
Dominican Republic	1	1.01512	1.01965	0.926041	1.056	0.975108	0.83726	0.936281	0.932235	0.844869	0.951016	0.922398	1.04318	0.947223	0.991776	0.943784	0.941736	0.948992	0.991854	0.946617	1.01577
Ecuador	1	0.892522	0.923968	0.973536	0.747648	0.761022	0.763398	0.813465	0.788653	0.715854	0.710819	0.681511	0.637548	0.561406	0.757463	0.642958	0.574956	0.550737	0.535938	0.521789	0.503159
Egypt	1	0.958041	1.00424	1.08089	1.2836	1.51635	1.64852	1.66066	0.823824	1.0793	1.221	1.22104	1.38403	1.9861	1.10537	2.05874	1.77907	1.73282	1.21238	1.49018	1.61147
El Salvador	1	0.961132	0.965052	0.915928	1.0531	1.00648	0.928498	0.938967	1.03101	0.922082	0.8488	0.884169	0.914351	0.895916	0.812433	0.777866	0.808706	0.764806	0.714273	0.710477	0.746323
Equatorial Guinea	1	0.359399	0.279324	0.364546	0.263638	0.487093	0.315421	0.246672	0.279264	0.306754	0.241187	0.242156	0.243562	0.253488	0.2992	0.395967	N/A	0.434424	0.204233	0.289113	0.151338
Eritrea	1	0.966603	0.944946	0.970198	0.955406	0.941764	0.911272	0.888476	0.90553	0.884149	0.841084	0.800204	0.786447	0.741795	0.702151	0.723263	0.727044	0.67607	0.672929	0.663441	0.66189
Estonia	1	1.02671	1.08535	1.15574	1.12146	1.09722	1.44874	1.47711	1.82465	2.18606	1.94143	1.9231	1.59762	0.900543	0.724388	0.67853	0.617326	0.66234	0.671507	0.643384	0.627413
Ethiopia	1	0.974131	0.937962	0.910235	0.889745	0.860768	0.796137	0.778586	0.763267	0.737333	0.72503	0.706686	0.690044	0.689969	0.671493	0.639427	0.614096	0.604055	0.58972	0.574693	0.566761
Fiji	1	0.968922	0.958832	0.992994	0.812478	0.731798	0.823043	0.708766	0.656507	0.634873	0.542631	0.78312	0.745402	0.673713	0.488222	0.673159	0.74371	0.668183	0.647472	0.641654	0.684078
Finland	1	0.927311	0.9113	1.78071	1.11163	1.76042	2.29267	2.29812	2.15555	2.15193	2.2356	1.92651	1.62937	2.21679	0.788001	1.25916	1.27662	1.18773	1.46384	1.42246	1.44256
Netherlands Antilles	1	1.02675	0.794849	0.646501	0.466101	0.43213	0.255325	0.276384	0.287204	0.227005	0.215288	0.223037	0.259379	0.180212	0.22127	0.1552	0.0449741	0.0191306	N/A	N/A	N/A
France	1	0.964699	0.937467	0.890748	1.0041	0.95481	1.00807	1.03464	0.988418	1.07966	1.22463	0.868636	1.1388	1.13491	0.964841	0.937865	0.831665	0.72713	0.77049	0.763102	0.755176
French Polynesia	1	1.05818	0.896794	0.902299	0.924262	1.09399	0.915248	0.946745	0.99908	0.939855	0.985721	1.37871	2.0835	1.68065	1.20609	0.874728	0.821604	1.37654	0.685928	0.597009	0.592397
Gabon	1	0.995543	0.888957	1.02248	0.696339	0.758807	0.599637	0.628251	0.560532	0.604289	0.556403	0.538807	0.511661	0.510612	0.445605	0.510837	0.511409	0.494345	0.583429	0.577828	0.545438
Gambia	N/A	N/A	N/A	N/A	N/A	N/A	N/A	N/A	N/A	N/A	N/A	N/A	N/A	N/A	N/A	N/A	N/A	N/A	N/A	N/A	N/A
Georgia	1	1.02289	1.05656	1.11239	0.985462	1.06601	0.943918	0.960346	0.877554	1.12413	1.13606	1.24661	1.3308	1.19253	1.17241	1.26362	1.42695	1.20111	1.33302	1.27007	1.28392
Germany	1	1.00909	0.970438	0.933377	1.07119	1.05334	1.4136	1.31803	1.36617	1.36434	1.2241	1.30693	1.22072	1.24961	1.08265	1.12279	1.18379	1.09505	1.11116	1.10498	1.12307
Ghana	1	0.974121	0.953077	0.903308	0.908217	0.825816	0.746455	0.747314	0.775461	0.75358	0.88288	0.840338	0.670855	0.652533	0.618489	0.624596	0.577738	0.581346	0.564302	0.508284	0.49837
Greece	1	1.06966	1.04819	1.0612	1.15879	1.19469	1.33189	1.35868	1.3335	1.27285	1.26499	1.23939	1.31347	1.25301	1.09818	0.987966	1.06031	0.914704	0.870341	0.857821	0.864614
Greenland	1	1.01236	1.02611	1.02415	1.04315	1.03799	1.04383	1.05209	1.07204	1.07447	1.08666	1.1072	1.11981	1.14571	1.15711	1.14595	1.147	1.14298	1.14989	1.15205	1.15586
Grenada	1	1.13373	1.18045	1.31993	0.898509	1.96593	1.46838	1.40466	2.02576	2.02793	2.36696	1.87937	2.24833	2.03516	1.56191	1.70447	2.05382	1.64152	1.63367	1.3536	1.51774
Guatemala	1	0.812719	0.807794	0.935015	0.777411	0.741957	0.683235	0.758952	0.752884	0.670764	0.71835	0.676823	0.70082	0.702547	0.697602	0.643881	0.633926	0.664832	0.671499	0.666017	0.671495
Guinea	1	0.972574	0.946096	0.925282	0.894686	0.888859	0.842567	0.856155	0.854186	0.835281	0.800813	0.781145	0.77485	0.729621	0.732559	0.706624	0.702761	0.688835	0.679446	0.657451	0.641627
Guinea-Bissau	1	0.973311	0.937144	0.930206	0.897825	0.851476	0.833628	0.843815	0.817723	0.806744	0.788617	0.779885	0.744444	0.728802	0.711312	0.678824	0.637904	0.647439	0.626174	0.593285	0.555711
Guyana	1	0.9996	1.01107	1.00933	1.02544	1.0636	1.01147	0.902339	1.04766	1.06533	1.12993	1.13562	1.1685	1.16836	1.17773	1.21382	1.22632	1.23367	1.01157	0.999502	0.999183
Haiti	1	0.95764	0.93812	0.945971	0.916558	0.888009	0.912047	0.919168	0.857183	0.965713	0.942722	0.981871	0.789931	N/A	N/A	N/A	N/A	N/A	N/A	N/A	N/A
Honduras	1	0.779088	0.716543	0.904086	0.703938	0.758334	0.695074	0.791467	0.663441	0.624462	0.557347	0.549243	0.558736	0.536844	0.625416	0.510032	0.534155	0.548609	0.486615	0.504609	0.504401
Hungary	1	1.04634	1.06521	1.16424	1.15723	1.12394	1.08462	1.14796	1.21362	1.2478	1.16614	1.04098	0.956385	0.958147	0.857045	0.843926	0.89647	0.806405	0.825042	0.872567	0.884636
Iceland	1	0.931224	0.918892	1.00004	0.933419	0.96053	0.963423	0.717899	0.755418	0.749095	0.839878	0.793388	0.769328	0.69629	0.565985	0.62608	0.602013	0.596274	0.671866	0.692259	0.675185
India	1	0.989763	0.969503	0.916023	0.943716	0.93314	0.925618	0.91546	0.902686	0.862424	0.864848	0.870477	0.876488	0.867942	0.858731	0.845479	0.847565	0.821645	0.8094	0.814388	0.812421
Indonesia	1	0.972786	0.979081	0.885659	0.806397	0.8548	0.804292	0.881176	0.912785	0.873378	0.84179	0.908294	0.941016	0.997901	1.04019	1.06098	1.04356	1.02371	1.02684	1.11107	1.10093
Iran	1	0.978301	0.98385	1.03662	0.989623	1.01744	0.929216	0.939574	0.829299	0.824785	0.837014	0.830526	0.761014	0.873231	1.03794	0.848077	0.806781	1.09705	0.948529	0.932175	0.897313
Iraq	1	0.995198	0.796327	0.952484	0.907431	0.942511	0.848783	0.740189	0.90777	0.887557	1.01012	1.08793	0.846533	0.915091	1.16065	1.14251	1.06202	0.91922	0.841228	0.819142	0.793642
Ireland	1	1.00765	0.987946	0.994598	1.05383	1.02784	1.06989	0.922095	1.01001	0.955137	0.831929	0.937308	0.913245	0.772598	0.741521	0.607575	0.588822	0.655562	0.646628	0.687859	0.75099
Israel	1	1.22634	1.10207	0.899162	1.12319	0.859763	0.858657	0.893898	0.813215	0.973599	0.841788	0.924704	0.796244	0.811262	0.747049	0.97823	1.08621	0.929887	0.796751	0.698847	0.697125
Italy	1	0.974046	0.97518	1.00853	1.12584	1.17921	1.47597	1.41637	1.44651	1.53926	1.43492	1.66662	1.49604	1.2043	0.996748	0.977101	0.984584	0.853413	0.866088	0.858749	0.863253
Jamaica	1	1.06816	1.04218	0.972939	0.972335	1.20996	1.1538	1.40353	1.42408	1.98341	1.33299	1.27452	1.27058	1.39147	1.18118	1.20137	1.10287	1.13453	1.22123	1.1493	1.30043
Japan	1	0.994117	0.920418	1.18663	1.02839	1.34256	1.5744	1.27801	1.34714	1.54555	1.44841	1.25112	1.20726	1.25911	0.877497	1.0198	1.00735	0.963416	0.923734	0.874315	0.854807
Jordan	1	0.959689	0.957163	0.80253	0.684163	0.821739	1.14423	0.976434	0.79595	0.860026	0.893936	0.720615	0.903993	0.692565	0.455992	0.708427	0.438272	0.366925	0.439621	0.460136	0.412864
Kazakhstan	1	1.04644	1.07124	1.10082	1.10559	0.995197	1.00392	1.01473	0.972521	1.00279	1.0255	1.00416	1.00198	0.93948	1.04384	0.988536	0.950441	0.974081	1.01021	0.963414	1.06185
Kenya	1	0.97001	0.95218	0.935667	0.904442	0.894639	0.864993	0.866899	0.824865	0.792646	0.787906	0.77208	0.794616	0.745644	0.74937	0.739251	0.736306	0.693721	0.669732	0.67534	0.656997
Kiribati	1	1.05469	0.933727	0.735569	0.793982	0.97617	N/A	0.606901	0.266004	0.605795	N/A	0.445352	0.77065	0.310082	0.493971	0.517876	0.679231	0.461653	0.348	0.177724	0.41811
Kosovo	1	0.835683	0.833875	0.818649	0.85101	0.971044	1.00683	0.972603	1.02696	0.985914	0.9312	0.91125	0.908284	0.90743	0.876576	0.882444	0.88476	0.826023	0.837905	0.832771	0.843668
Kuwait	1	0.684638	0.654072	0.495478	0.578714	0.555781	0.616686	0.712191	1.55597	0.557319	0.674579	0.62216	1.16084	0.684008	0.721902	0.731688	0.855077	0.56903	0.488421	0.606104	0.536341
Kyrgyz Republic	1	1.01941	0.932994	0.962144	0.862616	0.864568	0.879096	0.918852	0.911828	0.855318	0.877343	0.890622	0.871913	0.880881	0.771977	0.800342	0.842722	0.824667	0.808024	0.864627	0.84575
Laos	1	0.959831	0.92527	0.919513	0.863986	0.840008	0.802711	0.774617	0.78843	0.738776	0.69275	0.688598	0.638596	0.68432	0.777774	0.726857	0.740264	0.726535	0.658769	0.643928	0.633134
Latvia	1	1.01835	1.06879	1.11351	1.17451	1.21096	0.946254	1.07527	1.09115	1.46337	1.46294	1.53896	1.68659	1.18465	0.958598	0.785213	0.778244	0.959843	0.786605	0.984567	0.976358
Lebanon	1	1.05434	1.09949	0.999319	1.26194	0.940991	1.38099	1.29189	1.16345	1.48695	1.65999	1.55634	1.61078	1.52433	1.35006	1.87861	1.67045	1.3784	1.13497	1.40957	1.44837
Lesotho	1	0.979658	0.940357	0.92263	0.898841	0.936804	0.984535	0.950793	0.747969	0.755435	0.739626	0.758948	0.786592	0.676593	0.670143	0.675629	0.663208	0.673848	0.652039	0.632454	0.600194
Liberia	1	0.987289	0.929243	0.848567	0.565843	0.583012	0.539263	0.526219	0.416234	0.747053	0.730675	0.718457	0.67511	0.658779	0.642195	0.610945	0.536793	0.498359	0.488584	0.460632	0.445588
Libya	1	1.14205	1.07913	0.907838	0.64018	0.560499	0.527377	0.662389	0.536035	0.656983	0.597456	0.453407	0.669288	0.712123	0.886987	1.14226	0.680483	0.98915	0.807395	0.676959	0.70299
Liechtenstein	N/A	N/A	N/A	N/A	N/A	N/A	N/A	N/A	N/A	N/A	N/A	N/A	N/A	N/A	N/A	N/A	N/A	N/A	N/A	N/A	N/A
Lithuania	1	1.07675	1.1381	1.09726	1.14164	1.07344	1.12409	1.09519	1.04286	1.09127	1.07094	1.11182	1.14327	1.12825	1.10063	1.11894	1.13712	1.06009	1.12167	1.11935	1.17739
Luxembourg	1	0.845487	0.877321	0.870252	0.828701	N/A	1.73895	1.41339	1.11617	1.30333	0.981997	1.11497	1.61823	1.44488	1.0141	1.37961	1.37046	0.940141	1.06707	1.04457	1.17713
Madagascar	1	0.986092	0.940123	0.957206	0.791306	0.729635	0.698718	0.710301	0.765773	0.696625	0.663653	0.600015	0.631365	0.574161	0.639756	0.591264	0.586668	0.565267	0.54879	0.527333	0.509519
Malawi	1	1.02889	1.03393	0.916902	1.00716	0.95454	0.881087	1.02615	0.806475	0.846338	0.833615	0.76499	0.684424	0.711777	0.71786	0.691766	0.589579	0.591617	0.560455	0.55117	0.516356
Malaysia	1	1.01908	0.9659	0.804449	0.799017	1.00559	0.862601	0.849612	0.522736	0.56706	0.530382	0.622704	0.608681	0.588176	0.495907	0.565198	0.588331	0.623618	0.729206	0.728998	0.720601
Maldives	N/A	N/A	N/A	N/A	N/A	N/A	N/A	N/A	N/A	N/A	N/A	N/A	N/A	N/A	N/A	N/A	N/A	N/A	N/A	N/A	N/A
Mali	1	0.984007	0.935045	0.926779	0.893096	0.857613	0.550452	0.519749	0.518289	0.573687	0.62137	0.53144	0.488427	0.525735	0.659267	0.490265	0.47618	0.447991	0.569153	0.554498	0.541369
Malta	1	0.83634	0.752554	0.856237	0.99893	0.775915	1.89188	1.7838	1.37948	0.943077	0.798904	0.777308	0.886187	0.997294	1.1064	0.875899	0.778445	1.1825	1.17221	0.963983	1.05928
Marshall Islands	1	0.945951	0.916693	N/A	0.85331	0.780515	0.805646	0.808031	0.777431	0.773997	0.931265	0.773692	0.742009	0.728209	0.733933	0.733424	0.731226	0.735721	0.719826	0.723435	0.717106
Mauritania	1	0.94613	0.938586	0.849345	0.879703	0.848144	0.808337	0.789656	0.852884	0.814536	0.780284	0.784132	0.773611	0.779541	0.726189	0.671973	0.719753	0.651304	0.649516	0.590868	0.563505
Mauritius	1	1.73377	1.41707	1.50208	1.89323	2.84231	3.446	2.6434	0.932324	2.16513	3.43886	0.980569	0.758412	1.74738	0.818062	1.31424	1.27864	1.69154	2.15003	2.06256	1.55241
Mexico	1	0.988539	1.02646	1.08477	1.00189	1.0701	1.04387	1.02292	0.973468	0.985057	0.978524	0.952173	0.946404	0.941838	0.884381	0.857955	0.841015	0.819306	0.758609	0.725075	0.698399
Micronesia, Fed. Sts.	1	N/A	1.07091	1.05996	1.0373	0.9771	1.13302	1.06206	1.21859	1.10736	1.05417	4.09885	3.14232	1.56988	0.981865	1.06058	0.945199	0.814563	0.831325	0.895879	0.92205
Monaco	N/A	N/A	N/A	N/A	N/A	N/A	N/A	N/A	N/A	N/A	N/A	N/A	N/A	N/A	N/A	N/A	N/A	N/A	N/A	N/A	N/A
Mongolia	1	1.02442	0.89924	0.963587	0.868193	0.867761	0.743858	0.743071	0.652106	0.727787	0.78714	0.611486	0.630388	0.758883	0.477469	0.527513	0.661465	0.760396	0.772583	0.649626	0.675368
Montenegro	1	0.89892	0.897863	0.992461	0.946709	0.961045	0.887243	0.810167	0.877881	0.774354	0.717826	0.858255	0.902271	1.07421	1.02882	1.07965	1.11891	1.12516	1.0998	1.1015	1.12122
Montserrat	1	0.951969	N/A	1.47641	1.28163	1.91369	1.99551	2.40294	2.57339	2.72639	1.78053	1.89086	1.99207	2.29041	1.79875	1.65418	1.69019	1.79245	1.84219	1.79689	1.97109
Morocco	1	1.00159	0.990714	0.98302	0.955991	0.985373	1.01417	1.11626	1.00506	1.08282	1.07107	1.03412	1.10964	1.06321	1.04654	1.02642	0.98902	0.95228	0.938326	0.942329	0.921127
Mozambique	1	0.94645	0.932256	0.918047	0.826745	0.901003	0.778643	0.729918	0.710765	0.615632	0.715132	0.691341	0.57417	0.612771	0.612382	0.51682	0.529058	0.531504	0.514455	0.484175	0.472837
Myanmar	1	0.97939	0.962962	0.965163	0.887865	0.843057	0.823618	0.816378	0.856042	0.772009	0.747971	0.717902	0.685849	0.715503	N/A	N/A	0.804095	0.796326	0.716845	0.725081	0.715767
Namibia	1	0.932592	0.916627	0.939327	0.865879	0.858617	0.683367	0.815553	0.778868	0.812995	0.753644	0.787087	0.778638	0.701605	0.74392	0.734669	0.710851	0.690694	0.632975	0.618109	0.633044
Nauru	N/A	N/A	N/A	N/A	N/A	N/A	N/A	N/A	N/A	N/A	N/A	N/A	N/A	N/A	N/A	N/A	N/A	N/A	N/A	N/A	N/A
Nepal	1	1.00121	0.958336	0.952822	0.950272	0.930956	0.813386	0.813645	0.89305	0.832193	0.837689	0.84269	0.664125	0.788794	0.785894	0.824838	0.828382	0.819293	0.801381	0.809306	0.789167
Netherlands	1	1.11866	1.07005	1.09823	1.1344	1.1485	1.82891	1.48505	1.53827	1.58638	1.59338	1.49365	1.4569	1.54021	1.41125	1.34316	1.32541	1.24932	1.33701	1.34462	1.38314
New Caledonia	N/A	N/A	N/A	N/A	N/A	N/A	N/A	N/A	N/A	N/A	N/A	N/A	N/A	N/A	N/A	N/A	N/A	N/A	N/A	N/A	N/A
New Zealand	1	0.91269	0.901414	0.907151	0.858276	0.850148	0.834841	0.819515	0.806995	0.74825	0.782983	0.72034	0.750344	0.695664	0.691961	0.746227	0.692166	0.709259	0.7749	0.771308	0.72912
Nicaragua	1	0.980297	1.04195	1.04213	0.967798	0.885363	0.81984	0.83823	0.794962	0.686231	0.740004	0.803473	0.792746	0.801223	0.822835	0.632528	0.636049	0.619533	0.562028	0.530414	0.543394
Niger	1	0.964941	0.950932	0.977636	0.930547	0.857874	0.791763	0.762502	0.730888	0.715704	0.694062	0.70497	0.702389	0.614454	0.596644	0.597013	0.568262	0.578118	0.516548	0.528845	0.525915
Nigeria	1	0.988839	0.936388	0.950045	0.883213	0.815703	0.815663	0.825769	0.856092	0.786976	0.777948	0.705911	0.773307	0.727384	0.749258	0.702332	0.763608	0.541249	0.636094	0.602258	0.573824
Norway	1	1.01853	1.02472	1.16549	1.01787	1.12452	1.11153	1.15207	1.03702	1.0264	1.03323	0.99455	0.933393	0.921028	0.848256	0.880213	0.854519	0.857529	0.741896	0.705615	0.670861
Oman	1	0.848078	0.893581	0.920498	0.871711	0.810557	0.788473	0.653076	0.77634	0.652292	0.710633	0.714973	1.14859	1.22284	0.652296	0.633709	0.56739	0.528923	0.486953	0.550407	0.477729
Pakistan	1	0.965488	0.943062	0.928816	0.908341	0.870041	0.783589	0.72152	0.764309	0.809295	0.820384	0.826123	0.789696	0.837404	0.781212	0.747907	0.661558	0.700377	0.699038	0.718518	0.709308
Palau	1	N/A	N/A	0.684744	N/A	0.55503	0.32428	0.302861	0.289138	0.306438	0.458836	0.404012	0.449809	0.476687	0.54499	0.381256	0.370567	0.263869	0.2489	0.260143	0.311622
Panama	1	0.997137	0.945081	0.969042	0.953992	0.978775	0.671951	0.712774	0.587605	0.684192	0.599744	0.605178	0.60105	0.627162	0.619314	0.637521	0.640386	0.656692	0.735723	0.754016	0.754006
Papua New Guinea	1	0.948197	0.91046	1.04704	0.822398	0.78716	0.737147	0.722853	0.56368	0.594348	0.549485	0.523945	0.47538	0.467695	0.463808	0.616227	0.625765	0.639984	0.588784	0.555334	0.512311
Paraguay	1	0.827649	0.831738	0.917938	0.796737	0.849375	0.751325	0.63456	0.658483	0.640855	0.583896	0.553136	0.520513	0.586358	0.567324	0.590695	0.607213	0.609469	0.577488	0.634068	0.628102
Peru	1	0.986557	0.971417	0.962938	0.924515	0.913755	0.87844	0.875636	0.892901	0.849128	0.821932	0.802774	0.823277	0.818884	0.830734	0.794024	0.785922	0.808399	0.837053	0.828855	0.801939
Philippines	1	1.09547	1.1438	1.03525	1.0356	1.02694	0.849	0.875093	0.767091	0.709876	0.685184	0.784499	0.682302	0.682922	0.659122	0.655482	0.669528	0.682715	0.656448	0.669505	0.685996
Poland	1	1.03668	1.05486	1.09706	1.08506	1.13283	1.16414	1.0724	1.05546	1.08047	1.13433	1.1192	1.13777	1.16853	1.04821	1.06819	1.06385	1.01941	0.966278	1.01407	1.03596
Portugal	1	1.60147	2.34607	1.22733	3.49589	3.20811	4.79917	3.92651	2.38424	2.9991	2.39776	3.02288	1.85878	1.97398	1.51221	1.3595	1.21547	1.02136	1.14419	1.04487	1.04807
Puerto Rico	1	1.00306	0.954824	0.923615	1.01148	0.826595	1.16607	1.08745	1.06661	1.31328	1.17522	0.977986	N/A	N/A	1.11826	N/A	N/A	0.906287	0.73915	0.722533	1.06193
Qatar	1	0.743498	0.820214	0.541122	0.457541	2.31497	3.67628	0.833537	2.35266	0.680126	0.924512	2.23929	1.19982	0.985066	0.971264	1.23066	1.65456	1.82893	1.45959	1.39483	1.39994
South Korea	1	1.11276	1.06175	1.26164	1.08059	1.89193	1.35596	1.41959	1.24466	1.37636	1.30549	1.50824	1.41741	1.38719	0.982579	1.29844	1.38567	1.26309	1.32696	1.26419	1.23621
Moldova	1	1.07594	1.13364	1.14195	1.01932	1.15449	1.04399	0.935212	1.25417	1.22546	1.08668	1.15123	1.20435	1.30458	1.08729	1.06183	1.13691	1.10091	1.06551	1.08189	1.10717
Romania	1	1.02317	1.02623	1.04813	1.00988	0.946944	0.91559	0.943397	1.04435	1.02981	1.06915	1.07256	1.06235	1.07577	1.04416	1.10201	1.06522	1.05307	0.988591	0.973047	0.964163
Russia	1	0.996107	1.00346	0.90175	0.959162	0.769298	0.772777	0.728646	0.822746	0.788635	0.776034	0.785946	0.755406	0.785954	N/A	0.843247	0.800118	0.880612	0.846007	0.816815	0.731758
Rwanda	1	1.02531	1.0522	0.802265	0.740678	0.651114	0.606156	0.719476	0.607126	0.61365	0.666113	0.573596	0.582718	0.578157	0.636729	0.577356	0.611109	0.639821	0.585174	0.573135	0.563916
St. Kitts and Nevis	1	1.06939	1.03771	1.11581	0.829034	1.34949	1.06806	1.08717	1.62514	1.76466	1.08726	1.5513	1.29566	1.42348	1.57026	1.11653	N/A	0.955474	1.20771	1.03483	1.17109
St. Lucia	1	1.78379	1.81523	0.98872	0.634639	1.24691	0.587886	0.52756	1.21531	0.940183	1.08097	0.857143	1.02358	0.729009	0.567535	0.777787	0.782913	0.700264	0.873224	0.655762	0.727663
Samoa	1	1.00067	0.967111	0.983172	0.986256	0.909979	0.909504	1.09577	0.91456	0.889456	0.88347	0.908679	N/A	N/A	0.958194	0.950596	1.03918	0.899195	0.88002	0.857818	0.93217
San Marino	N/A	N/A	N/A	N/A	N/A	N/A	N/A	N/A	N/A	N/A	N/A	N/A	N/A	N/A	N/A	N/A	N/A	N/A	N/A	N/A	N/A
Sao Tome and Principe	1	0.998682	0.916829	0.836972	0.81501	0.872457	0.715024	0.83584	0.813219	1.03706	0.755369	0.834474	0.687867	0.769758	N/A	0.948349	0.676956	0.62898	0.67859	0.657369	0.655615
Saudi Arabia	1	1.05475	1.03453	0.992773	2.28429	2.38484	1.67521	2.96884	2.67393	2.25313	2.43166	3.60088	3.48045	2.60517	2.21267	2.40127	2.22624	1.40678	1.36028	1.29383	1.19338
Senegal	1	0.984374	0.964867	0.941047	0.934678	0.898636	1.01963	1.22642	0.968496	0.985493	1.07913	1.00083	1.10333	1.05755	0.720417	0.90998	0.772653	0.803024	0.607389	0.601228	0.582608
Serbia	1	1.12627	1.1402	1.07631	1.01089	0.921448	0.849043	0.863333	0.851098	0.955572	0.854381	0.978422	0.914792	1.04924	0.925038	0.914323	0.891764	0.883289	0.923496	0.815721	0.825616
Seychelles	1	1.32561	1.30208	1.28451	1.16366	0.635506	1.13364	1.12864	1.14286	0.691287	0.697897	1.29423	0.559615	0.593149	0.736269	0.764316	0.748531	0.858703	1.23504	1.39048	1.37761
Sierra Leone	1	1.01995	1.02296	1.00401	0.9911	0.965527	0.936534	0.892404	0.830974	0.77198	0.760212	0.736346	0.711234	0.699452	0.671312	0.608454	0.593754	0.559142	0.500937	0.489765	0.478338
Singapore	1	1.02398	0.981446	0.947039	0.880465	0.964448	1.13384	1.05978	1.02322	1.03065	1.10863	1.20329	1.06722	1.00956	0.803223	0.957461	0.965736	1.44489	0.949879	0.881577	0.92371
Sint Maarten	N/A	N/A	N/A	N/A	N/A	N/A	N/A	N/A	N/A	N/A	N/A	N/A	N/A	N/A	N/A	N/A	N/A	N/A	N/A	N/A	N/A
Slovakia	1	1.20571	1.2373	1.19908	1.19615	1.14774	1.1981	1.07986	1.34281	1.05818	1.02433	1.0417	1.1505	1.16275	0.91959	0.928209	0.953682	0.922763	0.883511	0.843921	0.849876
Slovenia	1	1.00049	0.944116	1.0544	1.1213	1.19739	1.0698	1.02127	1.37346	2.14219	2.07991	3.27097	2.48499	1.67243	1.85201	1.32044	1.11584	1.08369	1.05096	0.931822	0.941907
Solomon Islands	1	0.970468	0.946	0.908357	0.866985	0.857337	0.828417	0.78836	0.402756	0.491822	0.752956	0.443982	0.592353	0.336337	0.317713	0.517788	0.542129	0.460867	0.500338	0.495598	0.50997
Somalia	1	0.976281	0.946893	0.91462	0.870257	0.831443	0.825945	0.799553	0.781296	0.750001	0.721699	0.705869	0.687373	0.667199	0.642332	0.619144	0.602996	0.586445	0.562084	0.561603	0.546605
South Africa	1	0.991216	0.970254	0.954406	0.937808	0.969295	1.08015	1.05471	0.892405	0.891434	0.846872	0.855159	0.842709	0.729692	0.741444	0.72661	0.714045	0.708843	0.666596	0.644172	0.631762
South Sudan	N/A	N/A	N/A	N/A	N/A	N/A	N/A	N/A	N/A	N/A	N/A	N/A	N/A	N/A	N/A	N/A	N/A	N/A	N/A	N/A	N/A
Spain	1	1.0266	1.00653	1.04956	1.07459	1.09122	1.09071	1.38397	1.11872	1.10279	1.06963	0.99444	0.939941	0.924074	0.847491	0.794605	0.802433	0.785296	0.743739	0.717068	0.729678
Sri Lanka	1	0.940313	0.951876	1.06714	0.947304	0.978871	0.906155	0.844549	0.737362	0.753161	0.735911	0.740677	0.739259	0.780884	0.776947	0.809287	0.965108	0.929608	1.25342	0.940466	0.997367
St. Vincent and the Grenadines	1	1.01923	1.10326	1.18553	1.00031	1.19996	0.987331	0.771897	0.993981	2.25628	1.93781	1.25972	2.20899	1.39819	1.56863	1.50662	1.17307	1.449	1.40802	1.5888	1.65969
Palestine	1	0.811057	0.830742	0.815481	1.1628	3.65075	8.57601	4.08984	6.16501	1.84435	1.3626	0.728241	0.350399	0.522252	0.319363	0.383739	0.431438	0.489357	0.468443	0.493755	0.472305
Sudan	1	0.967218	0.947598	0.934683	0.796269	0.756707	0.820842	0.720984	0.722532	0.667872	0.669899	0.658001	0.627361	0.595878	0.653069	0.591929	0.585114	N/A	N/A	N/A	N/A
Suriname	1	0.814732	0.744446	0.786563	0.780892	0.940535	0.761014	0.808521	0.96283	0.922697	0.790466	0.686078	0.703315	0.697408	0.663948	0.676509	0.686361	0.682925	0.778258	0.768572	0.774907
Swaziland	N/A	N/A	N/A	N/A	N/A	N/A	N/A	N/A	N/A	N/A	N/A	N/A	N/A	N/A	N/A	N/A	N/A	N/A	N/A	N/A	N/A
Sweden	1	1.00321	0.968905	1.25888	0.945932	1.40433	0.832841	0.773734	1.05535	1.09392	0.997867	0.932543	0.965675	0.990186	0.767741	0.894412	0.934845	0.904851	0.991893	0.979531	0.988787
Switzerland	1	1.05136	0.927991	0.879683	0.95114	0.803842	1.45731	1.51785	1.3626	1.2592	1.19231	1.24698	1.11568	1.20078	1.00481	0.992621	1.16516	1.07971	1.20238	0.986295	0.983506
Syria	1	0.909916	0.863361	0.906025	1.03598	1.02223	1.08472	0.980739	1.20687	0.886692	1.03341	0.901363	0.842242	1.10651	1.06417	0.958296	0.910654	0.775556	0.84274	0.783932	0.783375
Macedonia	1	0.990236	0.968626	0.955824	0.909634	0.95543	0.901326	0.968057	0.926317	0.992785	0.911109	0.861842	0.849774	0.895522	0.960949	0.936978	0.897099	0.892777	0.912605	0.912444	0.913296
Tajikistan	N/A	N/A	N/A	N/A	N/A	N/A	N/A	N/A	N/A	N/A	N/A	N/A	N/A	N/A	N/A	N/A	N/A	N/A	N/A	N/A	N/A
Thailand	1	0.997707	0.940364	0.89772	1.00659	1.00702	0.989014	1.00991	0.976393	0.96146	1.20239	0.993049	0.989859	1.00147	0.910392	0.907083	0.915407	0.947238	0.945941	0.912689	0.879554
Timor-Leste	1	1.01655	1.01934	1.0434	1.03219	1.89731	N/A	0.991564	0.926405	0.745529	0.75365	0.677272	0.701118	0.725234	0.762113	0.684542	0.554463	0.541891	0.666069	0.540205	0.511846
Togo	1	0.963626	0.943393	0.914643	0.86254	0.833238	0.747819	N/A	0.778753	0.765975	0.721268	0.697109	0.656669	0.64201	0.62818	0.592134	0.572563	0.521188	0.53143	0.506373	0.497777
Tonga	1	1.09722	0.911645	0.889635	0.796594	0.70084	0.586033	0.446583	0.405012	0.335044	0.298961	0.307994	0.500217	0.426345	0.460848	0.426348	0.5524	0.414867	0.366138	0.366934	0.460804
Trinidad and Tobago	1	1.31882	1.57412	1.30449	0.850917	0.867123	0.797887	1.13692	0.997803	0.927967	0.936456	0.90976	1.16239	1.04578	0.880249	0.836816	0.904118	0.922058	1.10587	1.14574	1.53578
Tunisia	1	0.959558	0.945862	0.904009	0.905123	0.943279	0.998413	1.33444	1.00606	1.10733	1.13001	1.08057	1.47063	1.23828	0.96499	1.05303	1.0068	0.946045	0.878247	0.882294	0.856496
Turkey	1	1.02561	1.01467	1.05261	0.989721	1.07444	0.948199	1.00188	1.00031	1.07105	1.043	1.04845	1.07173	1.08994	0.899015	1.00161	1.0808	1.02435	0.966926	0.915392	0.906765
Turkmenistan	1	0.982328	1.36834	1.314	N/A	N/A	1.23014	1.26055	1.28495	1.20075	1.04683	0.893737	1.26103	1.19945	0.895207	0.923864	0.911328	0.882705	0.880934	0.989447	0.847211
Turks and Caicos Islands	1	N/A	N/A	0.747493	0.807739	0.859131	1.4329	1.33282	0.987432	6.5835	7.84879	7.97663	13.6292	19.7508	12.5197	7.72001	2.52104	4.80271	2.62535	2.45676	1.78043
Tuvalu	N/A	N/A	N/A	N/A	N/A	N/A	N/A	N/A	N/A	N/A	N/A	N/A	N/A	N/A	N/A	N/A	N/A	N/A	N/A	N/A	N/A
Tanzania	1	0.98601	0.968018	0.955019	0.932556	0.893374	0.826692	0.809358	0.752109	0.755394	0.730395	0.714833	0.667935	0.661084	0.632802	0.601293	0.589773	0.576727	0.564553	0.525702	0.501673
Uganda	1	0.967684	0.924844	0.913787	0.878631	0.853831	0.8001	0.790828	0.757253	0.721755	0.71034	0.696822	0.633407	0.62139	0.605017	0.575027	0.556067	0.508549	0.483433	0.481709	0.468115
Ukraine	1	0.937595	0.998783	1.06256	0.840539	0.982378	0.912134	0.877117	1.07331	0.876621	0.83662	0.848375	0.888197	0.851392	0.779534	0.819435	0.873402	0.865116	0.867671	0.810815	0.747665
United Arab Emirates	1	0.984892	1.03089	0.81788	0.842588	0.959395	0.790159	0.789476	0.739533	0.816041	0.762779	0.620483	0.674088	0.586842	0.487671	0.504961	0.485155	0.475345	0.495698	0.503015	0.508968
United Kingdom	1	1.0287	1.06147	1.03015	1.10833	1.03031	1.14253	1.0849	1.05468	1.03756	1.18163	1.16874	1.0154	0.947641	0.791836	0.835134	0.740617	0.715022	0.72617	0.724517	0.720337
United States	1	0.999764	0.981112	0.965409	1.03327	0.998487	0.999931	1.00709	0.956467	0.978139	0.96819	0.957751	0.9082	0.862251	0.842867	0.828511	0.78274	0.791666	0.806125	0.809592	0.809414
Uruguay	1	0.877387	0.857141	0.977589	0.864141	0.941233	0.75496	0.762387	0.660066	0.666441	0.800998	0.818572	0.701255	0.751597	0.655418	0.663094	0.731891	0.774205	0.901893	0.784792	0.755784
Uzbekistan	1	1.06446	1.06794	1.05329	0.897757	1.04798	1.01337	0.907973	0.831573	0.842676	0.904494	0.897462	0.970717	0.967271	0.756545	0.801315	0.921848	0.853032	0.82077	0.858191	0.834088
Vanuatu	1	0.961397	0.914338	0.942685	0.945548	0.933621	0.813104	0.843658	0.689309	0.839539	0.59939	0.380712	0.78042	0.609206	0.676724	0.731365	0.525141	0.449211	0.446795	0.471495	0.458355
Venezuela	1	0.951838	0.959903	0.981178	0.945779	0.937902	0.982651	0.892146	0.882374	0.941776	0.913785	0.946793	1.03387	1.09429	1.09999	1.02991	0.917432	1.08369	1.13152	1.24079	1.12684
Vietnam	1	0.940677	0.909943	0.941994	0.867776	0.879793	0.942909	0.973005	0.934515	0.927835	0.926993	0.955859	1.11208	1.08383	1.13176	1.07752	1.16605	1.09442	1.21847	1.53241	1.69563
Yemen	1	0.952232	0.938472	0.938221	0.681368	0.703023	0.799339	0.799864	0.850564	0.863585	0.969223	1.02839	0.985798	0.940934	0.771114	0.780882	0.75999	0.763209	0.740623	0.745964	0.688047
Zambia	1	0.985962	0.930835	0.980503	0.913338	0.871769	0.767849	0.819604	0.792827	0.745355	0.743639	0.732585	0.695441	0.688922	0.661455	0.627469	0.569185	0.51429	0.543956	0.459051	0.460392
Zanzibar	1	0.978526	0.926612	0.977479	0.914012	0.944879	0.963459	0.814308	0.916084	0.820876	0.837559	0.877704	0.797487	0.741972	0.756493	0.737481	0.695391	0.723463	0.76562	0.746958	0.631456
Zimbabwe	1	0.945463	0.959578	0.864057	0.914073	0.807932	0.75373	0.85764	0.943	0.905529	0.946531	0.96787	0.925389	0.935964	1.00981	0.896912	0.959905	0.873761	0.938256	0.912116	0.851859
Taiwan	1	1.06581	1.06041	1.10911	0.643635	1.34836	0.540851	0.546133	0.592273	0.703565	0.685487	0.664929	1.33954	0.587791	0.486424	0.574926	N/A	0.565548	0.562162	0.472473	1.7735
World	1	0.992064	0.979122	0.96651	0.952922	0.9366	0.927034	0.920663	0.909872	0.907728	0.897793	0.88795	0.877185	0.867497	0.752455	0.842483	0.829558	0.816869	0.806477	0.798065	0.788774

## Sheet: GDP_pc
Country Name	1995	1996	1997	1998	1999	2000	2001	2002	2003	2004	2005	2006	2007	2008	2009	2010	2011	2012	2013	2014	2015
Afghanistan	0.144402	0.137885	0.144532	0.137539	0.131525	0.190306	0.19281	0.206176	0.189167	0.186225	0.212165	0.230987	0.284407	0.268123	0.321712	0.42087	0.463354	0.544224	0.516617	0.48932	0.482093
Albania	0.588627	0.816515	0.645189	0.767554	1.0255	1.26558	1.47171	1.52785	1.64339	1.92535	2.15897	2.37295	2.60681	2.97017	2.94813	3.08706	3.18637	3.33404	3.38499	3.52385	3.62739
Algeria	1.1079	1.25257	1.41663	1.41213	1.48006	1.89805	1.94587	1.87805	1.85143	2.08953	2.49025	2.75769	2.86984	3.33355	2.77235	3.36531	3.90094	4.3592	4.15024	4.14347	4.21658
Andorra	17.4161	18.4965	19.9887	20.8161	22.3455	23.2091	24.6058	25.9301	28.6753	30.7565	33.0828	34.7555	35.3758	32.4259	30.9659	29.8766	29.3862	29.8983	30.5154	31.4036	31.8903
Angola	0.355164	0.467459	0.596974	0.495242	0.483974	0.803906	0.785558	0.919895	0.865047	1.00363	1.51887	2.0578	2.26679	2.76523	2.32483	2.68982	3.28803	3.91516	4.16578	4.13551	4.11595
Anguilla	8.07459	8.56635	10.4872	11.7107	12.8052	14.6668	15.2112	14.2406	12.4854	13.1073	14.5626	17.5356	19.7031	18.0236	14.9235	14.6784	15.2234	15.8237	15.1762	16.3149	16.1451
Antigua and Barbuda	5.9828	6.59105	7.71151	8.1216	8.78512	10.1534	10.1574	9.83819	8.50667	8.18311	8.97633	10.0057	10.289	9.90117	9.23794	9.04463	8.47691	9.75135	9.19132	9.58151	9.68486
Argentina	6.73568	7.23665	8.62087	8.80186	8.69307	9.94432	9.58857	3.40917	3.57965	3.80486	4.57418	5.32677	6.05506	6.87198	6.68215	8.50035	9.69697	11.343	11.1287	9.59763	9.6154
Armenia	0.305116	0.396472	0.460675	0.542322	0.560547	0.674247	0.77535	0.828322	0.822295	0.958255	1.32039	1.71769	2.28906	2.72516	2.14534	2.4266	2.53275	2.7067	2.73747	2.84384	2.91852
Aruba	12.5446	13.0453	15.7897	17.0013	18.1612	22.3261	23.0801	21.6099	18.4181	18.1429	18.7186	19.1394	18.8413	18.4073	17.6501	17.728	17.9414	19.3434	19.0156	19.4786	19.3767
Australia	16.5908	18.7365	20.8084	18.5758	21.1352	23.1149	22.4151	23.4167	24.8279	27.0913	30.0362	31.4973	34.5452	33.7652	33.4007	44.2157	49.3579	53.8955	49.7319	47.1234	47.5897
Austria	23.1306	23.4261	23.4977	24.3412	25.4418	26.5453	27.3443	27.8686	28.3784	29.5	30.738	32.1989	33.9907	34.939	34.1635	35.1943	36.729	37.6123	38.0678	38.5008	38.426
Azerbaijan	0.30588	0.321855	0.445255	0.500658	0.538461	0.709278	0.785691	0.807013	0.781201	0.840121	1.26786	1.96838	2.80869	3.78835	3.54738	4.40564	5.16306	5.87187	5.97548	5.98562	5.97981
Bahamas	10.9171	12.6117	15.0855	16.9264	19.2401	22.9981	24.0033	23.8013	19.4565	17.6837	18.801	18.8795	17.7223	16.0731	15.7923	16.5275	15.456	17.3381	16.9591	16.9026	16.7789
Bahrain	9.18622	9.5951	10.8305	10.1597	11.1765	14.7641	14.3681	13.8006	12.5725	12.7395	14.4261	15.3681	15.2981	15.6764	13.8707	15.624	16.3164	18.5299	18.9761	19.2254	19.319
Bangladesh	0.243379	0.258119	0.292778	0.300713	0.325467	0.374143	0.378269	0.365372	0.328698	0.318313	0.322741	0.383129	0.395647	0.418546	0.486408	0.567447	0.576244	0.648398	0.739177	0.824046	0.867035
Barbados	6.55032	7.17376	8.45904	9.61221	10.5685	12.5244	12.856	12.3471	10.6334	10.3456	11.4252	12.4535	12.0058	11.2608	11.8402	11.9924	11.155	12.0518	11.74	11.6584	11.6787
Belarus	1.03704	1.12259	1.22736	1.34699	1.13587	1.13024	1.38942	1.5645	1.60849	1.91202	2.51109	3.06302	3.45347	4.33317	3.70916	4.38703	4.52814	5.26526	5.85922	6.09965	5.85279
Belgium	21.8397	21.8172	22.0701	22.7822	23.8726	25.1271	25.8166	26.4948	27.1771	28.6126	29.7133	30.9417	32.3981	32.9252	32.1751	33.4768	34.2692	34.8157	35.1068	35.6953	35.9756
Belize	2.16245	2.3607	2.60099	2.66543	2.87474	3.64267	3.81782	3.76119	3.25311	3.08029	3.15954	3.33297	3.15402	3.0379	3.05178	3.27539	3.24378	3.66164	3.58079	3.66705	3.64238
Benin	0.302941	0.329337	0.343728	0.365368	0.378704	0.405141	0.422887	0.442792	0.459057	0.469012	0.483407	0.49813	0.5149	0.55737	0.568579	0.571288	0.593118	0.65355	0.690977	0.706525	0.722991
Bermuda	32.6505	35.5025	42.6984	45.7676	50.9036	60.9389	65.747	66.1822	58.444	56.5641	60.954	66.2213	66.2805	64.3292	64.8386	67.7907	62.5122	67.5092	65.8324	65.2653	65.1542
Bhutan	0.428448	0.462949	0.593551	0.592236	0.676173	0.829174	0.902182	0.936586	0.88196	0.88235	1.00173	1.06297	1.26976	1.21999	1.26851	1.64285	1.76514	1.89728	1.76681	1.92094	2.03951
Bolivia	0.677106	0.753898	0.88694	0.943306	0.95	1.09028	1.06993	0.966137	0.810971	0.786488	0.840572	0.981889	1.01342	1.1804	1.27328	1.49377	1.70744	2.07213	2.23677	2.37118	2.44733
Bosnia and Herzegovina	0.403774	0.587943	0.910732	1.03036	1.19935	1.63676	1.76065	1.93192	2.03843	2.21371	2.38442	2.70976	3.04859	3.44913	3.3664	3.47686	3.62646	3.69478	3.82113	3.93577	4.08035
Botswana	2.30026	2.37714	2.70014	2.55644	3.02712	3.62604	3.49273	3.23142	3.68021	3.93654	4.29858	4.27795	4.16711	3.8216	3.71599	4.78486	5.49005	5.54606	5.33973	5.53483	5.41464
Brazil	3.66515	4.0576	4.63963	4.47543	3.22643	4.02951	3.52242	3.00574	2.70764	2.91395	3.83629	4.66783	5.33215	5.97046	6.1233	8.46861	9.45573	9.36498	8.89854	8.64927	8.24591
British Virgin Islands	16.4378	18.7525	23.8597	27.1517	31.2785	39.3854	42.8937	38.6093	28.61	26.6063	30.1643	31.3988	29.8126	26.3299	23.7353	24.7596	23.5757	24.9864	23.9096	23.1487	22.7452
Brunei Darussalam	13.4664	14.6321	16.2536	12.5254	14.6552	21.6049	20.3741	19.7402	18.176	19.5049	23.2325	27.3226	26.4008	28.5786	22.2055	26.5909	33.7623	37.3274	33.8391	31.5334	31.0278
Bulgaria	1.31274	0.952136	1.18777	1.58062	1.54324	1.74242	1.97063	2.20766	2.3961	2.71846	3.12966	3.59448	4.32885	4.96059	4.98712	5.0936	5.56772	5.70759	5.76524	5.90995	6.12431
Burkina Faso	0.181781	0.198151	0.204212	0.230182	0.25053	0.245559	0.264933	0.275766	0.293799	0.298519	0.326932	0.334767	0.346487	0.387203	0.396089	0.433875	0.478863	0.527838	0.538912	0.550536	0.555976
Burundi	0.128	0.113117	0.140167	0.128689	0.120737	0.119925	0.112785	0.0985088	0.0756942	0.0760842	0.120858	0.132053	0.124571	0.133384	0.149876	0.174769	0.177537	0.195625	0.199203	0.220132	0.204723
Cabo Verde	1.09399	1.13252	1.21071	1.27639	1.49395	1.52607	1.61126	1.65192	1.7784	1.80704	1.87104	2.08587	2.26972	2.47295	2.46832	2.4978	2.63577	2.67003	2.68124	2.67421	2.68895
Cambodia	0.237004	0.251201	0.268505	0.240467	0.277348	0.326676	0.35937	0.359025	0.320845	0.328498	0.380931	0.429715	0.460665	0.506828	0.529005	0.592395	0.633722	0.744198	0.780318	0.833924	0.877464
Cameroon	0.505169	0.543666	0.567258	0.602917	0.631443	0.65833	0.686319	0.715313	0.7292	0.747819	0.764868	0.798339	0.810009	0.838288	0.862192	0.89186	0.930416	0.98361	1.03597	1.09385	1.12793
Canada	15.6792	16.6417	19.1438	18.6208	20.7442	26.0197	26.3224	25.3751	24.7763	25.5885	28.9602	32.0523	32.3448	31.5466	29.2258	35.804	37.4173	41.0486	39.3902	37.819	37.9461
Cayman Islands	31.2282	32.9882	37.9019	47.4491	51.3587	59.1482	60.2228	57.5974	48.5307	45.2408	50.2523	51.0217	49.8058	45.5536	44.056	44.3783	42.5054	46.5317	45.2638	44.6366	44.0477
Central African Republic	0.265573	0.241393	0.245697	0.250678	0.26688	0.275892	0.28407	0.280724	0.264765	0.263456	0.274926	0.291256	0.299319	0.317971	0.330195	0.344711	0.363526	0.390198	0.268512	0.308964	0.3201
Chad	0.179092	0.199573	0.206268	0.229583	0.202882	0.204505	0.250652	0.265563	0.292703	0.415762	0.533064	0.56924	0.568319	0.632829	0.582316	0.62103	0.652617	0.70057	0.687184	0.71546	0.705257
Chile	3.9577	4.2303	5.10799	4.88842	4.6747	5.48936	5.10111	4.68544	4.26024	4.99927	6.12172	7.54372	7.6538	7.3264	7.3218	9.65198	10.5008	12.003	12.0213	11.1205	11.2554
China	0.465975	0.559097	0.689576	0.738908	0.818318	1.03665	1.17369	1.21318	1.13947	1.21118	1.41276	1.67178	1.96127	2.34281	2.73106	3.38638	3.97748	4.88162	5.27997	5.75502	6.12094
Hong Kong	17.9278	19.5211	24.0723	22.9955	23.5426	27.887	28.1713	26.0849	21.1962	20.0404	21.4069	22.4651	22.3113	21.4174	21.9973	24.5418	25.2358	28.7727	29.1433	30.5402	30.9963
Macao	13.7586	14.127	15.5563	14.3215	14.0994	16.274	16.6032	16.51	15.2278	17.4927	19.6301	23.5062	26.1339	27.391	29.0736	39.821	47.8809	59.8678	67.6135	71.549	55.8363
Colombia	2.24749	2.39449	2.89878	2.66745	2.42459	2.67637	2.67534	2.49201	1.98483	2.2031	2.71991	2.95228	3.4088	3.69269	3.68928	4.71287	5.1903	6.17669	6.09122	5.99918	6.12807
Comoros	0.372176	0.371038	0.372139	0.372374	0.394892	0.404233	0.442082	0.458196	0.478835	0.498569	0.50663	0.516018	0.525628	0.540931	0.557893	0.57994	0.595853	0.61776	0.633053	0.647386	0.638903
Congo Republic	0.576744	0.694083	0.690588	0.562605	0.704191	1.08075	0.940936	0.937357	0.88234	1.03654	1.31499	1.60156	1.36374	1.68039	1.57325	2.11085	2.35472	2.30883	2.23913	2.19351	2.19257
Cook Islands	4.26313	4.465	4.65763	4.17036	4.74667	5.47458	5.86473	6.2878	7.05315	7.3498	7.44004	7.59146	8.51956	8.25737	8.15382	10.3733	11.261	13.3798	12.6078	13.4179	13.5248
Costa Rica	2.54602	2.59023	3.06834	3.33459	3.85091	4.39835	4.58256	4.38413	3.75327	3.5704	3.7754	4.16129	4.39321	4.57781	4.69116	6.02123	6.4369	7.62468	7.93785	7.90558	8.1104
Croatia	3.66588	4.14968	4.59475	5.04	4.81839	5.3266	5.85685	6.402	6.90056	7.52929	8.21819	9.0471	9.88259	10.8018	10.1391	10.1876	10.4449	10.302	10.2212	10.1473	10.3996
Cuba	2.12873	1.79522	2.02842	2.07258	2.39548	2.96785	3.1623	3.16662	2.82237	2.72593	3.0356	3.71638	3.78092	3.65377	3.93024	4.27969	4.39613	5.03361	5.12944	5.49205	5.48167
Curacao											13.6816	13.8498	13.1311	13.1998	14.0022	14.9643	14.4673	16.1271	15.5295	15.3805	15.1789
Cyprus	8.77136	8.91471	9.44472	10.1219	10.6973	11.603	12.2039	12.4611	12.8699	13.7613	14.7436	15.6808	16.4441	17.3319	16.7638	17.1663	17.3545	17.1531	15.7879	15.0746	15.1995
Czech Republic	4.40742	5.09845	5.27363	5.75102	5.90476	6.4899	7.36353	8.47284	8.61126	9.3799	10.7047	12.0732	13.3776	15.3994	14.1228	14.9084	15.5581	15.2871	14.919	14.68	15.2687
Cote d'Ivoire	0.582686	0.636748	0.668448	0.709049	0.723047	0.69307	0.733396	0.751864	0.765374	0.739461	0.748453	0.757709	0.777331	0.84434	0.872618	0.919664	0.887887	0.990676	1.08204	1.15392	1.22193
North Korea	0.169236	0.376605	0.407077	0.406154	0.424308	0.500903	0.532019	0.494402	0.415034	0.378361	0.4379	0.455338	0.433128	0.372446	0.352541	0.42756	0.455725	0.501369	0.503037	0.525705	0.523049
DR Congo	0.164103	0.168371	0.189283	0.195784	0.179057	0.190402	0.191251	0.185212	0.153747	0.156097	0.175535	0.201254	0.204286	0.21619	0.209692	0.253245	0.278139	0.332812	0.347606	0.369708	0.385409
Denmark	27.0272	28.0782	28.956	29.7636	31.3761	33.2865	34.3363	35.1403	35.7664	37.3727	39.2386	41.4473	42.686	43.6372	41.5084	43.4849	44.0402	45.2408	45.4497	46.1655	46.3723
Djibouti	0.616817	0.606674	0.654522	0.651609	0.718447	0.838751	0.880031	0.844891	0.731295	0.694892	0.726745	0.768403	0.76398	0.80616	0.867627	0.945162	0.95804	1.11574	1.17847	1.32224	1.38503
Dominica	2.77652	3.09543	3.61532	3.89753	4.25859	4.99369	5.25795	4.90115	4.25348	4.28088	4.2129	4.47163	4.40651	4.48496	5.01937	5.20266	5.09123	5.62788	5.482	5.55371	5.28612
Dominican Republic	1.60042	1.77399	2.21409	2.33591	2.54578	3.19073	3.35696	3.18202	2.10781	2.03424	3.10108	3.24177	3.35204	3.35146	3.51325	4.04055	4.15564	4.66242	4.51642	4.66601	4.93451
Ecuador	1.51522	1.61081	1.96401	1.91638	1.43842	1.57053	2.12564	2.30961	2.15742	2.1775	2.42745	2.66709	2.61863	2.90521	3.04948	3.51151	3.75093	4.46673	4.59164	4.81656	4.74549
Egypt	0.787445	0.895922	1.08612	1.1524	1.25654	1.48195	1.4222	1.2605	0.885148	0.844517	0.988228	1.09722	1.21182	1.38382	1.63344	1.92405	1.93201	2.32072	2.1561	2.33331	2.38021
El Salvador	1.29183	1.43052	1.71225	1.85152	2.00769	2.42355	2.61138	2.54698	2.22749	2.11652	2.27751	2.43799	2.41014	2.38355	2.41237	2.61962	2.68327	2.99848	2.95586	3.04078	3.09833
Equatorial Guinea	0.251418	0.410943	0.850645	0.693431	1.17376	2.07514	2.95824	3.31111	3.5044	5.29558	7.64277	8.57783	9.52108	12.8138	8.76727	10.6163	12.9942	14.4912	11.9609	11.244	9.4868
Eritrea	0.15795	0.188907	0.217895	0.223647	0.225512	0.225416	0.240217	0.213377	0.205795	0.231068	0.222306	0.237059	0.231421	0.221602	0.308672	0.36353	0.418504	0.531049	0.561863	0.616963	0.632962
Estonia	2.35362	2.63896	3.19217	3.61202	3.86969	4.40998	5.02361	5.6138	6.34225	7.11507	8.30832	10.0366	12.0999	12.2881	10.5627	11.0502	12.5394	13.6138	14.4232	15.1658	15.3177
Ethiopia	0.101004	0.109506	0.123093	0.109634	0.106374	0.130669	0.12982	0.115374	0.10302	0.107037	0.127343	0.151249	0.170991	0.209212	0.23653	0.226198	0.243068	0.357681	0.372853	0.418138	0.449225
Fiji	2.04774	2.21345	2.46315	1.95325	2.39229	2.38014	2.40901	2.52754	2.65036	2.8326	3.04195	3.08941	3.07902	2.9388	2.49928	2.85019	3.12602	3.56674	3.61916	3.88306	4.02124
Finland	20.0862	20.3027	21.7597	23.1819	24.5619	26.2595	27.8171	28.3791	29.0089	30.2579	31.3224	32.7481	35.2324	36.309	33.7714	34.8513	36.4876	36.905	37.2659	37.518	37.5558
Netherlands Antilles	8.70136	9.22548	10.5254	9.51176	10.0815	12.1174	12.7875	12.0843	10.1613	9.30143	8.91914	9.12047	8.70178	8.70286	9.28488	10.1383	9.70594	10.8545
France	20.67	21.2781	21.481	22.3906	23.2676	24.324	25.1531	25.673	26.2465	27.2339	28.0354	29.1037	30.3528	30.8776	29.8456	30.7033	31.4728	31.7855	32.0612	32.1054	32.3281
French Polynesia	15.6731	15.2818	16.0375	16.557	16.9185	17.1449	17.0905	16.969	17.5118	17.7313	17.9723	18.13	18.5329	18.3544	17.6951	17.1187	16.4883	16.354	15.966	15.4931	15.37
Gabon	3.87701	4.47469	4.58905	3.81476	4.03383	4.99242	4.58352	4.41451	4.36456	4.62259	5.48386	5.68439	6.09152	6.85978	5.27939	5.92166	7.1848	7.12017	7.1092	7.04609	7.12206
Gambia	0.562448	0.60836	0.627422	0.644896	0.639462	0.688126	0.604122	0.466317	0.31794	0.332699	0.347168	0.349699	0.378526	0.413154	0.393634	0.424379	0.371832	0.396675	0.368817	0.33678	0.340895
Georgia	0.435701	0.521995	0.682338	0.717493	0.590042	0.749358	0.819517	0.824226	0.820379	0.970735	1.22905	1.49055	1.81746	2.15767	1.93951	2.2351	2.675	3.24539	3.24331	3.36646	3.46849
Germany	24.2566	24.0727	23.8496	24.3873	25.1409	25.6807	26.4483	26.6564	26.8377	27.468	27.8882	29.0268	30.5091	31.0721	29.9184	31.5196	33.6281	34.2551	34.9685	35.9556	36.1625
Ghana	0.47164	0.508533	0.552416	0.592318	0.628067	0.456512	0.489672	0.524492	0.528848	0.545225	0.641311	0.734658	0.795371	0.83212	0.778758	0.989661	1.13096	1.27668	1.37679	1.04655	1.0587
Greece	9.9083	10.8284	11.8405	12.017	13.0041	13.2346	13.9996	14.9228	16.3338	17.651	18.1265	19.7514	21.0331	21.7558	21.3	20.3046	18.618	17.3122	16.4466	16.2795	16.3493
Greenland	16.2525	16.5668	16.5799	17.9552	18.6069	20.2298	21.1603	21.4738	21.8411	22.8713	23.2771	25.3931	26.3054	27.7711	29.4499	30.3064	31.6041	32.487	32.4959	32.9147	33.0209
Grenada	2.13056	2.34259	2.81528	3.12335	3.53564	5.57509	5.73664	5.6388	5.14998	4.71651	5.46584	5.43312	5.37821	5.44266	5.34083	5.59311	5.36133	6.01026	6.07821	6.30879	6.56907
Guatemala	0.957744	1.03948	1.28267	1.38368	1.34551	1.59799	1.75119	1.79967	1.54998	1.50555	1.66906	1.79613	1.81586	1.89888	1.88873	2.13036	2.28921	2.58473	2.61986	2.80407	2.85722
Guinea	0.354208	0.369827	0.394411	0.357121	0.357876	0.364558	0.352346	0.328002	0.31437	0.295895	0.234234	0.236146	0.298607	0.297283	0.312925	0.33036	0.335442	0.398406	0.426376	0.422973	0.413567
Guinea-Bissau	0.536644	0.363624	0.307929	0.278967	0.311903	0.315867	0.334834	0.333766	0.318753	0.316197	0.341356	0.333465	0.350833	0.396567	0.389964	0.410691	0.496528	0.51252	0.522472	0.531951	0.543368
Guyana	0.993571	1.16158	1.3836	1.34509	1.37637	1.63346	1.68566	1.62868	1.39325	1.34371	1.4071	1.54864	1.69707	1.75069	1.94649	2.28175	2.46999	2.96569	2.99266	3.06815	3.1399
Haiti	0.263002	0.293365	0.352097	0.40539	0.456461	0.464087	0.450617	0.384791	0.278376	0.322702	0.360238	0.41269	0.455663	0.448695	0.472904	0.505771	0.529015	0.595385	0.610036	0.617335	0.615441
Honduras	0.631391	0.652529	0.821922	0.90337	0.955068	1.19274	1.27666	1.21114	1.03483	0.98994	1.06294	1.15229	1.16954	1.1983	1.30095	1.45733	1.52281	1.70643	1.62227	1.67991	1.71152
Hungary	3.4205	3.55058	4.03883	4.22379	4.49384	5.00166	5.88075	7.02796	7.41791	8.24362	8.96709	9.07301	10.0918	10.6403	9.28311	9.81299	10.081	9.97798	10.2292	10.5547	10.8908
Iceland	20.4866	21.9427	24.6771	27.5326	30.2003	34.3623	31.8399	33.6979	34.4941	37.7214	45.3413	44.6511	49.8421	37.5333	28.9228	31.3806	33.012	34.67	36.0358	39.4968	40.6341
India	0.288111	0.306937	0.366239	0.366007	0.403075	0.471481	0.493366	0.480326	0.462477	0.500676	0.576775	0.636894	0.731293	0.720476	0.774565	1.02259	1.09001	1.15185	1.14018	1.1955	1.26831
Indonesia	0.917845	1.04786	1.09731	0.484129	0.736603	0.89929	0.889232	1.01288	1.00195	0.983127	1.07913	1.34507	1.4412	1.56403	1.72094	2.34856	2.61083	2.87045	2.72009	2.62151	2.71493
Iran	1.44047	1.5743	1.60005	1.53764	1.6418	1.79423	1.99342	2.30533	1.97255	2.12132	2.5077	2.89033	3.41675	3.70545	3.87992	4.73	5.63172	6.01659	5.01317	4.11717	4.06921
Iraq	0.131264	0.230068	0.272942	0.341354	0.608372	0.776392	0.814088	0.739392	0.570413	0.800157	1.07867	1.56758	1.92428	2.40097	2.62837	2.87099	3.56379	4.44337	4.59479	4.88769	4.85104
Ireland	14.664	16.4226	19.8774	21.6406	24.6601	28.4066	31.501	34.4113	36.3935	38.3015	40.8443	43.2327	44.7358	41.6046	37.2076	36.4017	37.9538	38.12	39.0143	40.8892	43.8048
Israel	13.7554	15.1697	17.2878	17.2855	17.9552	22.793	22.6734	19.4914	16.7494	15.9888	16.5564	17.4355	18.2382	20.1547	19.9179	23.1747	24.2053	25.7084	27.5289	28.2401	28.4012
Italy	15.7527	18.1377	19.2137	19.8567	20.59	21.7185	22.7879	23.4844	24.2203	25.0743	25.6998	26.6203	27.5188	27.6456	26.522	27.0617	27.5627	27.1206	26.6703	26.5132	26.7404
Jamaica	1.96779	2.26198	2.86466	2.9828	3.14466	3.66968	3.83505	3.81316	3.07336	2.99758	3.2907	3.44021	3.3632	3.33917	3.09704	3.53766	3.66179	4.07699	3.79465	3.69344	3.721
Japan	32.5092	29.4738	30.2506	27.6244	32.843	40.3851	36.5302	33.0326	29.7834	29.2963	28.7607	27.1392	24.833	25.7449	28.1923	32.3869	33.2071	36.3296	29.0653	27.2194	27.3772
Jordan	1.12322	1.15541	1.32075	1.43059	1.52476	1.79506	1.92975	1.91656	1.67003	1.65725	1.76968	2.01959	2.01485	2.30091	2.50238	2.77403	2.73406	3.03214	3.02961	3.08688	3.04315
Kazakhstan	0.991978	1.06212	1.27325	1.3086	1.06035	1.33064	1.66471	1.75342	1.82826	2.31073	3.02937	4.21188	4.93824	5.78572	5.13453	6.83908	8.15621	9.49441	10.3279	9.48428	9.45452
Kenya	0.374645	0.383968	0.455045	0.481434	0.450368	0.497961	0.514732	0.480539	0.443028	0.42337	0.479214	0.554805	0.611963	0.623143	0.659331	0.729355	0.709091	0.904736	0.929781	1.00495	1.03392
Kiribati	0.549492	0.666551	0.738477	0.71715	0.782113	0.958193	0.848392	0.892689	0.936789	0.908868	0.975641	0.916605	0.990012	0.96899	0.937555	1.14253	1.23142	1.38038	1.26199	1.23876	1.26826
Kosovo	1.99438	1.30435	1.331	1.26245	1.00176	1.07983	1.65339	1.75727	1.70263	1.68023	1.73283	1.78552	1.96368	2.212	2.29989	2.47553	2.68358	2.81755	2.942	3.07377	3.17521
Kuwait	12.5788	15.1804	15.5851	12.5886	14.4418	19.9134	18.4684	18.812	19.5109	21.6415	28.5084	34.0042	33.3948	37.7621	26.9374	29.0257	34.665	40.1525	36.7251	32.8369	31.8419
Kyrgyz Republic	0.249599	0.310435	0.331463	0.306471	0.242222	0.302831	0.344831	0.340248	0.336817	0.348398	0.382801	0.432293	0.526369	0.656748	0.624305	0.66353	0.807067	0.922763	0.973058	0.963087	0.976188
Laos	0.268597	0.285681	0.292307	0.213622	0.250151	0.338325	0.347467	0.33825	0.319105	0.337216	0.379269	0.481909	0.51651	0.593461	0.650539	0.814014	0.913932	1.14749	1.25704	1.35603	1.43202
Latvia	1.66245	1.91233	2.36439	2.65472	2.95551	3.62882	3.98768	4.36612	4.5339	5.10099	6.06861	7.68703	10.23	11.0979	8.75303	8.53854	9.90042	10.724	11.3054	11.8115	12.2344
Lebanon	2.89404	3.49168	4.44154	4.83849	5.05567	5.58144	5.67121	5.61735	4.72922	4.40032	4.3298	4.32539	4.43898	4.83159	6.07734	6.67901	6.27207	7.02663	6.7908	6.72298	6.50219
Lesotho	0.372186	0.35904	0.418264	0.38993	0.406404	0.446859	0.418213	0.3651	0.44667	0.513116	0.5638	0.57858	0.587706	0.554109	0.607374	0.808242	0.87785	0.893583	0.765065	0.735939	0.744094
Liberia	0.0628577	0.0725114	0.127948	0.146062	0.172984	0.198125	0.194858	0.194045	0.122834	0.13338	0.149756	0.165517	0.169606	0.170685	0.192516	0.205103	0.271722	0.324836	0.344479	0.366826	0.358021
Libya	4.36194	4.88633	5.71344	5.12709	5.98445	7.7771	6.99036	4.19237	4.12985	4.69172	6.30278	7.45377	7.65488	10.7025	8.05881	9.89262	4.70589	12.7855	8.0609	5.05505	4.70908
Liechtenstein	60.0946	62.8752	63.585	68.286	76.1109	80.7943	82.6303	83.5823	79.0958	80.2718	84.3183	90.7228	95.0035	97.1641	90.2468	106.435	113.659	116.952	117.844	119.707	118.823
Lithuania	1.41195	1.83366	2.49628	2.82486	2.92137	3.57017	3.94172	4.38465	4.86705	5.39112	6.32419	7.3577	8.97182	10.182	8.4865	9.04279	10.3216	11.1617	11.8152	12.4221	12.7394
Luxembourg	40.794	41.2661	41.051	42.8638	48.6981	53.0449	53.238	55.2488	57.1671	60.2735	63.8954	70.6242	76.4948	76.7308	72.5665	77.8918	81.3553	82.0728	85.6311	87.7779	89.6065
Madagascar	0.178908	0.226019	0.21766	0.224925	0.228468	0.26628	0.311024	0.277377	0.280057	0.197063	0.220724	0.232513	0.275556	0.319905	0.297932	0.31129	0.326712	0.347734	0.350377	0.343428	0.344437
Malawi	0.190462	0.228954	0.263568	0.267546	0.27261	0.29983	0.296094	0.307708	0.229962	0.220474	0.225211	0.236965	0.23357	0.253383	0.301501	0.345975	0.367792	0.278401	0.238787	0.254362	0.254344
Malaysia	3.57286	4.07663	4.42027	3.14196	3.54137	4.55689	4.54829	4.58541	4.10559	4.145	4.49338	4.95327	5.30127	5.7857	5.25022	6.6389	7.25566	8.18933	7.99855	8.20922	8.47689
Maldives	1.68656	1.92302	2.38447	2.51637	2.83543	3.39382	3.42237	3.25428	3.05215	3.11356	2.82123	3.58553	3.78872	4.17096	4.37899	4.82462	4.71046	5.14092	5.16501	5.63762	5.60595
Mali	0.207978	0.221875	0.234881	0.250656	0.258558	0.262139	0.298352	0.289763	0.31086	0.323228	0.344332	0.36844	0.38104	0.419997	0.439789	0.47015	0.491995	0.506067	0.503882	0.536001	0.552384
Malta	7.48955	7.89064	8.6994	9.20422	9.91018	11.2504	11.5525	11.9306	12.0116	12.1088	12.7249	13.3284	14.227	14.9099	14.8224	15.906	16.5364	17.1779	17.7894	18.5573	19.5269
Marshall Islands	1.80562	1.70347	1.80197	1.84569	1.88044	2.23737	2.37137	2.43134	2.10582	2.04518	2.15024	2.22145	2.18382	2.16061	2.26384	2.56163	2.56857	2.97975	2.98151	2.99621	3.03726
Mauritania	0.551076	0.557896	0.588865	0.503591	0.501703	0.516966	0.51834	0.487474	0.467275	0.499116	0.560481	0.75149	0.738983	0.803937	0.748465	0.9061	0.98958	0.990917	0.972501	0.951069	0.941772
Mauritius	2.78144	3.10471	3.25131	3.24079	3.46776	4.25403	4.30617	4.25016	4.23775	4.33163	4.2436	4.34201	4.58408	5.26633	5.07506	5.86	6.45193	7.13691	7.19062	7.59444	7.84029
Mexico	2.59773	3.05453	4.05772	4.24343	5.02026	6.90325	7.5229	7.33999	5.96919	5.78552	6.40836	6.98303	6.80573	6.5876	5.54521	6.75064	7.05397	7.63013	7.73488	7.84528	7.93842
Micronesia, Fed. Sts.	1.57377	1.58787	1.67821	1.80753	1.9195	2.35007	2.4996	2.38698	2.02699	1.80583	1.88906	1.90508	1.77393	1.70004	1.91144	2.13654	2.14514	2.46663	2.30166	2.24753	2.23484
Monaco	76.3269	78.2056	78.5212	81.4448	84.424	88.0812	90.9611	92.7489	94.6137	97.7684	99.9043	106.009	121.881	122.763	106.942	108.996	116.452	119.07	130.96	140.529	139.887
Mongolia	0.556984	0.543569	0.539698	0.499294	0.48668	0.595326	0.678415	0.700779	0.662216	0.743699	0.930298	1.23177	1.38177	1.68598	1.42736	1.99831	2.70697	3.42173	3.32744	3.13251	3.14737
Montenegro	1.51531	1.12499	1.223	1.25937	1.29528	1.75726	2.13045	2.22018	2.46084	2.71754	2.95165	3.48898	4.34418	4.97864	4.79945	5.03799	5.25596	5.15972	5.45304	5.60007	5.82495
Montserrat	5.13317	4.60748	4.71772	5.0476	6.00369	7.85331	8.90604	9.62638	8.16595	7.63231	8.21665	8.47635	8.06526	7.94831	8.64667	8.46554	9.15957	9.8468	9.01719	9.39201	9.34435
Morocco	1.09134	1.23216	1.24183	1.32985	1.37378	1.45992	1.51669	1.52181	1.55072	1.594	1.6461	1.77842	1.84599	1.98965	2.08093	2.16861	2.21539	2.30926	2.4055	2.43308	2.50631
Mozambique	0.124512	0.170585	0.222939	0.253375	0.282923	0.300611	0.286332	0.278009	0.250965	0.270387	0.296533	0.307047	0.30786	0.341919	0.332389	0.316087	0.378106	0.465717	0.459796	0.476429	0.49201
Myanmar	0.136992	0.15113	0.179495	0.117416	0.135471	0.170884	0.182802	0.23262	0.184227	0.171475	0.197675	0.225716	0.270414	0.35524	0.473904	0.623029	0.822306	0.937404	0.91645	0.971762	1.03057
Namibia	1.84872	1.84264	2.08424	1.91504	1.95751	2.22816	2.04812	1.81158	2.19445	2.64353	2.8702	3.08925	3.0648	2.73026	2.97611	3.91125	4.0226	4.50511	4.2359	4.29908	4.39143
Nauru	2.66735	2.64571	2.70867	2.12676	2.2959	2.34141	2.11437	2.00137	2.11032	2.19586	2.08803	2.00085	1.67286	2.81017	3.87612	4.70018	6.13206	9.19076	10.7202	11.636	11.0558
Nepal	0.161693	0.169264	0.204219	0.190829	0.216626	0.261334	0.27223	0.253967	0.229049	0.231417	0.258738	0.275853	0.304865	0.300114	0.341391	0.454257	0.485289	0.507896	0.49419	0.522282	0.533572
Netherlands	22.0824	22.6019	23.2836	24.56	26.2253	28.0653	29.6828	30.4766	31.1561	32.1219	33.4186	35.4028	37.3869	38.7075	37.2076	37.9711	38.4631	38.5077	38.7208	39.2463	39.8249
New Caledonia	14.2837	14.3605	15.494	15.4358	16.3533	17.3226	16.9282	17.7735	19.269	20.7487	21.6854	23.6179	26.9902	25.3612	25.357	28.2146	28.6921	28.4497	28.4405	28.9841	28.5579
New Zealand	13.1167	14.6464	16.1429	13.3543	14.66	15.2801	15.5691	16.7449	18.4193	20.1492	22.2921	21.2299	23.7093	21.2625	20.2089	25.403	27.5944	31.3859	32.3677	33.4348	33.9236
Nicaragua	0.683507	0.720857	0.807807	0.848127	0.920514	1.10054	1.1715	1.06816	0.897742	0.877097	0.943939	0.991084	0.984953	1.03148	1.05981	1.14867	1.20623	1.39424	1.3847	1.48998	1.53961
Niger	0.143811	0.153189	0.152375	0.169834	0.169655	0.164705	0.178382	0.185812	0.184433	0.17742	0.198718	0.205395	0.212968	0.24113	0.244563	0.262499	0.269708	0.306693	0.316371	0.323801	0.324081
Nigeria	0.346337	0.369283	0.422123	0.432881	0.453553	0.660062	0.631655	0.781342	0.728763	0.838768	1.04356	1.30522	1.33319	1.51234	1.26485	1.75475	1.81533	2.15836	2.27396	2.44532	2.44478
Norway	26.6632	29.3939	32.3003	31.0309	34.126	41.302	43.0435	45.5386	44.2994	46.2818	53.6737	59.027	62.1154	65.8693	57.3683	66.1136	72.2521	79.0502	77.487	73.3381	73.7252
Oman	4.72472	5.31323	6.13188	5.5115	6.46289	9.28512	9.46464	9.12555	8.01785	8.1433	9.94213	11.4682	11.5263	15.002	12.0274	14.5372	15.0703	17.2606	15.9833	15.6744	15.3903
Pakistan	0.479951	0.480912	0.528086	0.524723	0.538957	0.600788	0.577742	0.587444	0.544588	0.556385	0.614336	0.690701	0.691939	0.62744	0.692941	0.771431	0.872656	0.945072	0.924001	1.02782	1.04969
Palau	5.12525	5.85453	6.69599	6.86726	6.86366	8.23629	8.72924	8.66195	7.27072	6.64227	7.26059	7.70722	7.06491	6.5891	6.85164	6.82342	6.55044	7.71625	7.93215	8.40196	9.10665
Panama	2.51803	2.62214	3.1122	3.34464	3.61774	4.15189	4.26707	4.12111	3.56266	3.48648	3.72992	4.02144	4.42531	4.73939	5.32396	5.98452	6.65737	8.29552	8.86681	9.55893	9.9449
Papua New Guinea	0.75458	0.806716	0.841232	0.633714	0.593331	0.679943	0.599267	0.549824	0.546513	0.544953	0.619013	0.68	0.697665	0.801045	0.835999	1.0296	1.2757	1.62571	1.52807	1.62223	1.73116
Paraguay	1.2926	1.41357	1.56906	1.38581	1.31811	1.44873	1.33115	1.21429	1.03853	1.13236	1.21065	1.44047	1.68623	2.07945	1.86327	2.43409	2.86382	3.02022	3.39103	3.58912	3.6491
Peru	1.64396	1.73551	2.02464	1.93664	1.82638	2.15065	2.21408	2.17841	1.92779	1.9685	2.21342	2.52482	2.63438	2.86176	2.97705	3.77508	4.13242	5.00794	4.98072	4.94545	5.04089
Philippines	0.897196	1.01054	1.09983	0.86133	1.02012	1.12483	1.06886	1.05761	0.893347	0.867472	0.959669	1.10779	1.21985	1.30445	1.30801	1.6056	1.68936	2.02366	2.09617	2.15783	2.24688
Poland	2.81561	3.26139	3.63046	4.0232	4.11894	4.86439	5.56186	5.49587	5.03307	5.33796	6.41115	7.16777	8.20675	9.4547	8.2022	9.5025	9.97911	10.2287	10.373	10.7916	11.1915
Portugal	9.00791	9.59725	10.2108	10.8851	11.7043	12.4539	13.0963	13.624	13.9428	14.5079	15.0989	15.7856	16.6209	16.8728	16.5347	17.0013	16.6639	16.016	16.2779	16.6536	16.9689
Puerto Rico	8.95868	9.70956	11.4484	12.9242	14.482	17.7777	20.5199	20.0877	17.5318	16.8737	17.6393	18.256	17.2582	16.9205	18.4654	19.9319	19.5891	21.8904	21.6505	22.2615	22.3646
Qatar	12.0926	13.6429	18.6138	16.6008	20.4199	32.4663	31.7445	31.7161	30.2131	33.6192	41.3594	47.9617	48.8656	56.3836	44.0545	53.0095	62.4665	70.6605	68.5217	67.7106	66.907
South Korea	9.42884	10.3472	10.6983	7.21197	9.76671	12.9359	12.5646	13.5179	12.5613	12.7886	14.9823	16.6362	16.8265	13.8908	13.1144	16.6606	17.2987	18.9592	19.494	20.9203	21.3495
Moldova	0.36683	0.363171	0.464859	0.414306	0.301447	0.383256	0.455319	0.485156	0.484619	0.57952	0.667684	0.756679	0.897323	1.15256	1.09317	1.23015	1.41508	1.60314	1.70265	1.69547	1.6779
Romania	1.26915	1.29419	1.40126	1.66362	1.51074	1.80618	2.0542	2.24709	2.4531	2.85632	3.75885	4.64223	5.99369	6.89192	5.89335	6.25895	6.60938	6.66127	7.21724	7.5256	7.84367
Russia	2.05833	2.08427	2.41416	1.63665	1.24861	1.9182	2.34532	2.51445	2.63007	3.29756	4.27897	5.51147	6.64082	7.91086	6.13911	8.05234	9.57174	10.958	10.9083	9.68228	9.30166
Rwanda	0.158322	0.171242	0.241851	0.242982	0.224603	0.234017	0.224531	0.207711	0.188092	0.190398	0.230615	0.268905	0.29144	0.335768	0.381294	0.419309	0.437494	0.524199	0.515798	0.528746	0.551644
St. Kitts and Nevis	5.33125	5.78036	7.16918	7.3305	8.15506	10.014	11.1682	10.8913	8.65136	8.39864	8.97563	10.2883	10.0222	9.91946	9.98272	10.1487	10.053	10.902	11.2352	12.0367	12.702
St. Lucia	3.20386	3.46868	3.90349	4.27512	4.67947	5.39581	5.20089	4.91055	4.42543	4.38625	4.58991	5.0992	4.98488	4.70422	4.93	5.43616	5.32711	5.83659	5.76943	6.04816	6.11651
Samoa	0.878359	1.0125	1.22789	1.1588	1.23935	1.43235	1.52228	1.58151	1.59999	1.73032	1.9387	1.9803	2.55482	2.43152	2.25395	2.75408	3.01287	3.3133	3.20089	3.2514	3.28099
San Marino	30.066	35.2327	36.8076	39.5156	43.5581	45.0479	48.3292	48.7792	51.356	54.0836	55.6968	58.2003	60.5166	61.6157	55.1083	51.8484	46.8171	44.1962	43.8061	42.8789	42.8964
Sao Tome and Principe	0.585825	0.772891	0.578222	0.452005	0.499775	0.557322	0.560684	0.582477	0.57403	0.557371	0.651342	0.671624	0.652034	0.771933	0.807809	0.841985	0.963849	1.13758	1.23982	1.33899	1.36202
Saudi Arabia	5.82952	6.51444	7.4843	6.57745	7.4766	9.88179	9.65098	9.15328	8.45782	8.95485	11.0369	12.2058	12.0128	13.6175	11.5329	14.483	17.0259	19.7668	18.8606	18.5573	18.7052
Senegal	0.425095	0.444011	0.447509	0.475877	0.500363	0.512607	0.537386	0.542542	0.568271	0.589329	0.621687	0.644567	0.693103	0.745431	0.729528	0.754531	0.776064	0.813328	0.803428	0.817043	0.844998
Serbia	2.18356	2.35011	2.79991	2.1527	2.2907	0.942101	1.82544	2.2736	2.50397	2.67808	2.83406	3.28712	3.98048	4.55444	4.17146	4.08044	4.61261	4.43326	4.82101	4.66938	4.72732
Seychelles	6.22096	6.21131	7.74859	8.30672	8.76991	9.9668	10.2617	10.584	9.03853	8.1814	8.91038	9.56293	8.8649	7.55907	6.95606	8.14681	8.75297	10.0619	12.0257	12.5514	12.8107
Sierra Leone	0.210401	0.23417	0.235484	0.18629	0.191602	0.204203	0.256977	0.267431	0.235646	0.214107	0.234334	0.256569	0.261703	0.276186	0.27867	0.30097	0.318479	0.438487	0.54031	0.524653	0.403007
Singapore	19.0263	20.6568	23.2411	19.445	20.4506	25.7609	24.0918	23.2837	20.8397	22.0316	23.9936	26.7275	28.6046	26.9945	27.6437	35.1122	38.1474	42.7532	42.4751	42.7223	43.0662
Sint Maarten											15.325	15.6963	14.8524	14.2899	15.6558	18.965	20.0974	22.2901	21.2015	21.3221	20.6966
Slovakia	2.84582	3.16209	3.58426	3.77258	3.61536	4.15515	4.43737	4.87327	5.5805	6.44303	7.30145	8.43665	10.415	12.1787	11.8004	12.4869	13.0315	13.393	13.6356	13.926	14.4129
Slovenia	8.17381	8.50609	9.2138	9.95827	10.7355	11.0746	11.7012	12.4933	13.155	13.8766	14.6034	15.7096	17.3952	18.6992	17.6601	17.6793	17.9492	17.495	17.4265	18.0669	18.5731
Solomon Islands	0.774517	0.858398	0.946758	0.817485	0.88818	0.887412	0.881433	0.665304	0.621817	0.637623	0.734194	0.779016	0.869878	0.858204	0.886645	1.02802	1.15811	1.38605	1.3583	1.45427	1.47092
Somalia	0.11113	0.125595	0.160412	0.20375	0.20491	0.246548	0.156546	0.134807	0.136313	0.157704	0.178678	0.177486	0.164042	0.155414	0.123126	0.0670076	0.0617862	0.0801452	0.0808185	0.0772116	0.0750187
South Africa	2.82393	2.70995	3.08213	2.76959	2.84511	3.22866	2.92508	2.59697	3.25148	3.80889	4.24401	4.38249	4.37934	3.86762	4.16262	5.48869	5.72633	5.83604	5.12628	4.82803	4.82349
South Sudan																	1.22518
Spain	11.7967	12.6567	12.9602	13.6835	14.7099	15.8907	17.1097	17.9995	19.0018	20.0335	21.3086	22.6833	23.8655	24.191	23.18	23.1847	22.8694	22.2975	22.1148	22.37	23.1066
Sri Lanka	0.558738	0.617806	0.744468	0.778421	0.809872	0.963663	0.947311	0.948943	0.868665	0.857427	1.00412	1.14435	1.19088	1.38719	1.50156	1.85022	2.09195	2.27781	2.4772	2.73852	2.85367
St. Vincent and the Grenadines	2.20302	2.39641	2.83526	3.09799	3.3931	3.97631	4.44648	4.51666	3.93103	3.86547	4.06815	4.46394	4.35662	4.32909	4.42644	4.69862	4.44054	4.96493	5.00171	5.06194	5.14004
Palestine	0.956826	0.978219	1.15342	1.20818	1.28484	1.44907	1.35108	1.11285	1.01947	0.993247	1.08531	1.06801	1.0702	1.17727	1.31589	1.65246	1.79839	2.05722	2.14428	2.13546	2.078
Sudan	0.406674	0.265842	0.354987	0.374309	0.377824	0.520169	0.627957	0.66879	0.641341	0.709645	0.914254	1.13988	1.34279	1.31899	1.28967	1.52753	1.33654
Suriname	1.45162	1.84096	2.17989	2.61173	2.24511	2.65104	2.38634	2.93173	2.82028	2.94076	3.53069	4.14539	4.20141	4.66075	5.33435	6.2605	5.97387	7.26339	7.17578	7.21766	7.15878
Swaziland	1.53396	1.52105	1.76399	1.6346	1.6706	1.8431	1.6826	1.42701	1.81125	2.10054	2.32437	2.30602	2.18898	1.92322	2.17516	2.85097	2.91533	3.12593	2.76242	2.62691	2.62213
Sweden	22.8704	25.6655	26.3649	26.8877	28.6892	31.7051	30.1129	31.2729	32.6745	34.1203	34.6318	36.8399	38.9089	37.9024	33.128	39.2821	42.8113	44.4692	45.3906	44.3349	45.6645
Switzerland	37.1115	36.7092	35.6522	37.0059	38.0733	40.9401	43.0307	43.7146	42.3995	42.8139	44.0468	45.6729	46.133	49.0347	49.9493	56.0283	63.2173	64.7639	63.7522	64.4417	64.2571
Syria	0.72049	0.807572	0.93914	0.997564	1.04314	1.29744	1.39901	1.34804	1.05875	1.10819	1.24685	1.39325	1.49593	1.75729	1.86199	2.16898	1.89897	1.53662	1.21294	1.35116	1.38492
Macedonia	1.81083	1.8353	1.72362	1.66757	1.7907	2.0075	2.02759	2.07404	2.12942	2.22094	2.44015	2.64705	2.94346	3.25746	3.25608	3.42525	3.63652	3.68071	3.95426	4.13542	4.28324
Tajikistan	0.161206	0.138827	0.135303	0.193149	0.164883	0.149893	0.190726	0.200278	0.209052	0.248632	0.270987	0.321779	0.379244	0.479832	0.477489	0.5567	0.599288	0.74787	0.789223	0.838786	0.845161
Thailand	2.16737	2.38955	2.16959	1.64136	1.90416	2.16939	2.10951	2.21665	2.08534	2.13833	2.32439	2.68155	2.89683	2.9757	3.01684	3.82463	3.94099	4.58933	4.67847	4.49114	4.6016
Timor-Leste	0.39504	0.473071	0.495248	0.575701	0.420369	0.562443	0.59305	0.555965	0.465637	0.891879	1.44755	2.03675	1.98953	2.79381	2.17738	2.76476	3.673	4.60963	3.5848	3.11024	3.16887
Togo	0.258167	0.282687	0.312652	0.290083	0.296729	0.281904	0.290992	0.29651	0.274402	0.281339	0.298258	0.302504	0.307716	0.349371	0.358045	0.367849	0.396539	0.445026	0.450273	0.480444	0.493092
Tonga	1.61403	1.79838	1.93862	1.73673	1.87805	2.08941	1.88942	1.93475	1.83709	1.90549	2.07931	2.28305	2.17293	2.25633	2.25601	2.70695	3.07803	3.47563	3.16424	3.12264	3.18645
Trinidad and Tobago	3.23986	3.60016	4.00884	4.26511	5.05118	6.96286	7.7441	7.45523	7.78336	8.27289	9.89892	11.2198	12.055	14.399	10.3968	11.9433	13.1322	14.3526	15.3397	15.7288	15.3887
Tunisia	1.65715	1.82741	1.94729	2.045	2.24151	2.39705	2.51775	2.48098	2.44171	2.50257	2.56604	2.68361	2.75547	2.92898	2.95953	3.1216	3.05695	3.24192	3.17937	3.23004	3.21841
Turkey	2.97524	3.23306	3.72822	3.91616	3.76227	4.56371	3.40942	3.77489	4.05328	4.70487	5.71726	6.1492	6.78464	7.04925	6.17634	7.62532	7.58201	8.23384	8.17914	7.80195	7.97311
Turkmenistan	0.397119	0.436555	0.542232	0.577743	0.810278	1.18248	1.65222	1.99577	2.13923	2.07761	2.39602	2.68421	2.76945	2.97795	2.89247	3.28259	4.05729	5.22906	5.79898	6.65564	6.96211
Turks and Caicos Islands	9.48007	10.5434	12.5403	13.8041	15.4726	18.3258	19.8445	17.8367	15.4733	15.5981	17.5745	20.7871	19.6958	19.8863	16.6601	16.7072	16.4933	17.2876	16.876	17.9244	17.6112
Tuvalu	0.97231	1.06165	1.27202	1.24289	1.38377	1.40944	1.50707	1.60679	1.65942	1.75677	1.7542	1.79827	1.9245	1.99082	1.86001	2.27851	2.65631	2.91235	2.68751	2.61306	2.65942
Tanzania	0.1929	0.239034	0.308368	0.331717	0.349277	0.412345	0.421905	0.404454	0.354555	0.34449	0.368353	0.35874	0.37403	0.430153	0.458439	0.508754	0.506628	0.619373	0.66431	0.697926	0.676616
Uganda	0.261262	0.264552	0.309354	0.291439	0.28234	0.300548	0.311628	0.300063	0.256074	0.269131	0.309112	0.324477	0.353374	0.384554	0.413725	0.437671	0.443723	0.526712	0.51513	0.536811	0.545434
Ukraine	0.74618	0.710904	0.904194	0.770707	0.617764	0.712802	0.901552	0.964371	0.961625	1.13881	1.52177	1.9034	2.33218	2.76356	1.89134	2.32106	2.66047	3.13714	3.17748	2.20982	1.99691
United Arab Emirates	20.4836	22.5079	25.718	23.7568	26.5153	35.8064	34.6821	33.1128	29.3764	29.0711	31.681	33.7265	31.1201	31.0971	23.6993	26.077	28.7702	32.7681	32.62	33.4247	34.4216
United Kingdom	16.3084	17.6923	21.871	23.4413	25.0308	28.5832	29.0106	29.9283	28.7982	30.7961	32.1904	33.8765	35.3381	30.7302	26.6455	28.8859	29.4667	32.1408	31.8462	34.8199	35.3208
United States	22.0047	23.6814	27.8418	29.39	32.4835	39.465	41.6186	40.3617	35.0753	33.7019	35.6144	36.984	35.0686	32.9082	33.6977	36.4893	35.7692	40.0452	39.6787	40.9915	41.6807
Uruguay	5.04236	5.48678	6.45444	6.87051	6.79997	7.44024	7.01353	4.32401	3.20197	3.31005	4.19385	4.67856	5.11201	6.15863	6.74677	9.00119	10.1731	11.8499	12.8073	12.7566	12.8999
Uzbekistan	0.451197	0.472566	0.577812	0.555213	0.659191	0.604348	0.417536	0.413309	0.351256	0.375685	0.441927	0.522208	0.606869	0.738102	0.873502	1.04339	1.12962	1.37142	1.43399	1.55541	1.6508
Vanuatu	1.23643	1.29726	1.4359	1.30005	1.37111	1.55023	1.50392	1.44064	1.39716	1.43739	1.51532	1.6294	1.74543	1.8335	1.89425	2.23616	2.35187	2.47426	2.40324	2.38172	2.3113
Venezuela	2.57511	2.37029	3.27154	3.4528	3.82561	5.17941	5.50084	3.86615	2.85449	3.43383	4.36405	5.36143	6.06671	7.62136	8.25739	10.2288	7.71361	9.99161	9.29342	12.5926	11.716
Vietnam	0.210391	0.253948	0.305265	0.309021	0.33899	0.420384	0.449779	0.452453	0.422552	0.47637	0.549116	0.620829	0.657315	0.77695	0.867563	0.987991	1.08827	1.34946	1.41988	1.52718	1.61131
Yemen	0.295599	0.360604	0.418518	0.382367	0.469374	0.658086	0.682466	0.684581	0.615726	0.627201	0.743105	0.858098	0.859433	0.924011	0.887648	0.987134	0.920244	1.00866	1.02984	1.07378	0.752864
Zambia	0.317895	0.301187	0.392109	0.316786	0.311934	0.370178	0.422362	0.398827	0.379386	0.42631	0.555317	0.819968	0.805546	0.930412	0.816268	1.10323	1.1947	1.32901	1.34299	1.31015	1.31734
Zanzibar	0.180226	0.233594	0.295343	0.293284	0.299082	0.359108	0.384226	0.356846	0.302211	0.30566	0.327994	0.36712	0.377557	0.410954	0.419812	0.4485	0.474643	0.594155	0.65211	0.705311	0.683776
Zimbabwe	0.643138	0.796012	0.90203	0.629396	0.62102	0.668686	0.676778	0.601615	0.469193	0.403905	0.386294	0.370041	0.329524	0.275423	0.423242	0.504327	0.546881	0.659909	0.679913	0.724921	0.718702
Taiwan	9.99533	10.7083	12.3188	11.4045	12.9181	16.1097	14.9727	14.5203	12.4697	12.3545	13.2672	13.4987	12.9022	12.1938	12.0073	14.2762	14.7105	16.1728	16.0449	16.5174	16.5405
World	4.12878	4.28087	4.70922	4.66298	5.02493	5.8887	5.96479	5.80402	5.38442	5.44625	5.82575	6.17759	6.30311	6.35556	6.27611	7.14079	7.45424	8.13502	7.98079	8.07664	8.18336

## Sheet: BLEBT_ts
Country	1995	1996	1997	1998	1999	2000	2001	2002	2003	2004	2005	2006	2007	2008	2009	2010	2011	2012	2013	2014	2015
Afghanistan		0.107242	0.110367	0.122686	0.12726			0.072433	0.0928635	0.0469429	0.0372378	0.0367416	0.00501975	-0.0289894	-0.0193543	-0.0313277	-0.0262086	-0.047086	-0.0267519	-0.0389922	-0.0343469
Albania	-0.000711953	-0.0118562	-0.00194715	-0.0226636	-0.00949103	0.00339589	0.0146903	-0.155843	-0.162636	-0.20142	-0.203781	-0.19498	-0.197017	-0.15712	-0.0731079	-0.116295	-0.160653	-0.0832111	-0.0989259	-0.0779978	-0.0794662
Algeria	-0.0893762	-0.109604	-0.0953229	-0.0846934	-0.0926962	-0.0300878	-0.0721523	-0.201104	-0.157324	-0.177671	-0.153758	-0.0951478	-0.0506538	-0.130383	-0.150373	-0.0455864	-0.0492961	-0.0611661	-0.139283	-0.180126	-0.158161
Andorra	-0.445253	-0.449966	-0.495682	-0.549428	-0.548123	-0.518854	-0.440609	-0.469036	-0.516886	-0.558362	-0.571222	-0.606952	-0.644084	-0.568886	-0.57683	-0.639535	-0.627773	-0.582729	-0.530193	-0.544706	-0.534751
Angola	0.114953	0.241615	0.159082	0.156032	0.180001	0.119181	0.471848	0.431245	0.0923142	0.202101	0.127257	0.149026	0.119573	0.0964571	0.0481204	0.104216	0.105019	0.183236	0.0624126	0.0546089	0.187656
Anguilla	-0.633367	-0.731144	-0.68759	-0.73885	-0.44069	-0.709046	-0.561747	-0.649308	-0.538873		-0.541418	-0.733839	-0.688126	-0.745128	-0.628886	-0.712356	-0.508715	-0.511279	-0.584408	-0.610488	-0.580416
Antigua and Barbuda	-0.548298	-0.520474	-0.45983	-0.611444	-0.254704	-0.428692	-0.271472	-0.502152	-0.528593	-0.701607	-0.487871	-0.502173	-0.546365	-0.560461	-0.679329	-0.736744	-0.591852	-0.792793	-0.494555	-0.439416	-0.551515
Argentina	0.0766759	0.0744669	0.0759534	0.0740764	0.080037	0.0862821	0.103106	0.229588	0.206311	0.253271	0.249039	0.233492	0.222807	0.229583	0.210707	0.218569	0.213879	0.211225	0.217824	0.227563	0.227023
Armenia	-0.043881	-0.066141	-0.0937571	-0.0861851	-0.0695635	-0.0840252	-0.115785	-0.201256	-0.0985493	-0.118955	-0.107964	-0.214831	-0.29541	-0.253241	-0.107709	-0.262864	-0.297132	-0.187196	-0.166949	-0.151474	-0.166984
Aruba	-0.973833	-0.975341	-0.976703	-0.954462	-0.972495	-0.972727	-0.968231	-0.954789	-0.949032	-0.959156	-0.951823	-0.949721	-0.953225	-0.985258	-0.988932	-0.99012	-0.979128	-0.967834	-0.959894	-0.948504	-0.946331
Australia	0.310121	0.319984	0.309952	0.303278	0.302026	0.360253	0.379214	0.363429	0.300243	0.329511	0.351209	0.360862	0.370952	0.441522	0.365118	0.479328	0.493661	0.458355	0.499507	0.564118	0.597539
Austria	-0.341382	-0.319395	-0.295573	-0.304594	-0.332621	-0.327783	-0.225187	-0.23158	-0.235096	-0.252297	-0.215906	-0.200026	-0.166042	-0.154774	-0.174866	-0.168403	-0.152209	-0.154931	-0.181391	-0.169898	-0.167888
Azerbaijan	-0.024673	-0.0652846	-0.0571462	-0.0931623	-0.152967	-0.0805258	-0.0722032	-0.162658	-0.209626	-0.254619	-0.0799954	-0.104269	-0.117816	-0.0522168	-0.0829442	-0.244806	-0.300043	-0.20566	-0.291504	-0.29896	-0.343852
Bahamas	-0.136426	-0.179045	-0.219095	-0.232975	-0.181097	-0.185866	-0.169605	-0.0658134	-0.105297	-0.187796	-0.183113	-0.193279	-0.162935	-0.142561	-0.21223	-0.187951	-0.147842	-0.237581	-0.245676	-0.243839	-0.221322
Bahrain	-0.887521	-0.907616	-0.910321	-0.874533	-0.882198	-0.891415	-0.880325	-0.783049	-0.707547	-0.809001	-0.773583	-0.801609	-0.766723	-0.806464	-0.763173	-0.801998	-0.818186	-0.80699	-0.781031	-0.800129	-0.834763
Bangladesh	-0.118484	-0.122423	-0.118638	-0.13895	-0.104168	-0.0796582	-0.0654189	-0.112225	-0.206236	-0.124615	-0.138397	-0.225993	-0.280575	-0.166251	-0.229488	-0.214781	-0.225289	-0.167963	-0.207735	-0.216349	-0.253686
Barbados	-0.682319	-0.78032	-0.801148	-0.790048	-0.699707	-0.771811	-0.709034	-0.693404	-0.735084	-0.764336	-0.800668	-0.784102	-0.802279	-0.823625	-0.850388	-0.834423	-0.829075	-0.855491	-0.771311	-0.761142	-0.798184
Belarus	0.061877	0.066979	0.0882809	0.00721466	0.0296263	0.00512626	0.250162	0.136669	0.139215	0.0957637	0.211178	0.149154	0.189776	0.19424	0.219441	0.167524	0.218381	0.247356	0.194343	0.171043	0.18162
Belgium	-0.626802	-0.607622	-0.575818	-0.655304	-0.562008	-0.479402	-0.302702	-0.298571	-0.368558	-0.324643	-0.298877	-0.289184	-0.321063	-0.295953	-0.328221	-0.319288	-0.288019	-0.31671	-0.305332	-0.29606	-0.289068
Belize	0.29932	0.337797	0.22224	0.286548	0.129692	0.18823	0.245107	0.239274	0.193184	0.326547	0.173283	0.218737	0.234953	0.192744	0.16324	0.356353	0.299759	0.382181	0.375162	0.385461	0.373721
Benin	-0.0171888	0.00322416	0.0288156	0.00903694	0.0155868	0.0215002	0.0637414	0.0608186	0.00187432	0.0429764	0.048717	0.0363287	0.0683509	0.023797	0.0585497	0.10745	0.0941469	0.151007	0.149406	0.0989043	0.109262
Bermuda	-0.704206	-0.941271	-0.945981	-0.711036	-0.943372	-0.972227	-0.965367	-0.997279	-0.944734	-0.965207		-0.979107	-0.973336	-0.965988	-0.968031	-0.975562	-0.976316	-0.97076	-0.978415	-0.97779	-0.976581
Bhutan	0.163363	0.1438	0.143134	0.138612	0.246063	0.127596	0.121243	0.108256	0.14451	0.10073	0.164556	0.415187	0.466331	0.452089	0.352332	0.229512	0.179551	0.189398	0.164849	0.0753444	0.14583
Bolivia	0.160276	0.153932	0.133202	0.0788519	0.117699	0.119133	0.13086	0.158638	0.193225	0.218949	0.240679	0.299209	0.292985	0.314509	0.219415	0.299303	0.286375	0.331388	0.342408	0.316135	0.249295
Bosnia and Herzegovina	0.0409458	0.0536064	0.0486758	-0.00534191	0.0395536	0.057338	0.0203453	-0.0508463	0.0939788	0.0261286	0.0680746	0.180686	0.14708	0.0990784	0.158934	0.0612454	0.0353684	0.0396831	0.0480616	0.0344019	0.0357714
Botswana	0.199442	0.295029	0.302021	0.166235	0.355893	0.380465	0.308899	0.304191	0.315638	0.335366	0.444108	0.381521	0.185929	0.335893	0.178284	0.267445	0.0675584	0.305074	0.352267	0.33478	0.0577819
Brazil	0.0013975	0.000173428	0.00129709	0.00688319	0.0167437	0.011588	0.0461098	0.0199741	0.0354025	0.0544894	0.049208	0.0417528	0.0486363	0.0530051	0.049517	0.0570562	0.0386517	0.0628257	0.124789	0.138065	0.158629
British Virgin Islands	-0.365445	-0.358106				-0.666484	-0.633674	-0.557321	-0.509637	-0.515702	-0.554921	-0.420099	-0.495896	-0.414004	-0.376208	-0.378781	-0.353675	-0.221118	-0.168962	-0.231636	-0.224986
Brunei Darussalam	-0.415038	-0.478057	-0.472546	-0.41955	-0.514111	-0.360583	-0.516211	-0.587371	-0.505046	-0.337612	-0.183975	-0.32725	-0.274147	-0.198644	-0.273204	-0.101009	-0.266102	-0.370646	-0.436797	-0.29252	-0.338832
Bulgaria	0.177879	0.240258	0.22938	0.171572	0.152874	0.134517	0.20062	0.159156	0.178948	0.169556	0.195919	0.16931	0.163693	0.160972	0.168105	0.248389	0.245284	0.255667	0.237766	0.253929	0.253278
Burkina Faso	-0.00630946	-0.0178515	-0.0153297	0.00690136	0.00633073	0.0145969	0.0872932	0.0225962	0.0229664	0.0368946	0.0162027	-0.0258464	0.0225143	0.0376872	0.0386853	0.0608315	0.0733629	0.058353	0.112527	0.116696	0.115845
Burundi	-0.00765019	-0.00751996	0.0175921	0.0160149	0.00652775	-0.0178552	-0.0714867	-0.049824	-0.11421	-0.0165104	-0.0672197	-0.043317	-0.108201	-0.040958	-0.185309	-0.0156364	-0.205768	-0.125402	-0.0750468	-0.0549455	-0.0423417
Cabo Verde	-0.180957	-0.219731	-0.221992	-0.177708	-0.333926	-0.142688	-0.132035	-0.197323	-0.255711	-0.256854	-0.297181	-0.283573	-0.232842	-0.307967	-0.203373	-0.206347	-0.194314	-0.226063	-0.29217	-0.201813	-0.184534
Cambodia	0.141003	0.116741	0.179198	0.134029	0.225643	0.22398	0.253003	0.262918	0.264361	0.294035	0.281762	0.2976	0.320355	0.310237	0.174915	0.18348	0.151052	0.183366	0.258041	0.243468	0.24571
Cameroon	0.118107	0.145835	0.174772	0.0995783	0.329688	0.329062	0.339806	0.318303	0.291538	0.250328	0.33381	0.329662	0.325541	0.315906	0.300559	0.261992	0.212329	0.237371	0.269031	0.250338	0.251967
Canada	0.166884	0.17282	0.177199	0.155417	0.187352	0.1532	0.19176	0.173444	0.132998	0.174759	0.172398	0.152865	0.169695	0.163118	0.136043	0.166573	0.162146	0.147342	0.163067	0.178343	0.187476
Cayman Islands	-0.250982	-0.0952606	-0.215078	-0.198075	-0.416225	-0.584081	-0.741303	-0.803454	-0.76228	-0.89151	-0.802136		-0.796972	-0.611055	-0.534735	-0.387736	-0.345274	-0.414717	-0.501874	-0.489287	-0.475588
Central African Republic	0.0256127	0.0289841	0.0393746	0.0327214	0.0393225	0.101708	0.0965952	0.0958763	0.112777	0.100647	0.102965	0.105412	0.222349	0.189908	0.252354	0.161247	0.126686	0.163432	0.226722	0.218139	0.218234
Chad										0.172526	0.150598	0.137993	0.177974	0.1738	0.191799	0.180184	0.230138	0.160557	0.107086	0.140308	0.173231
Chile	0.0159323	0.00528576	-0.00827774	-0.0392481	0.00459818	0.000106714	0.035153	0.0235744	0.0320448	0.0263115	0.000154291	-0.00304921	-0.0118715	-0.0426129	0.0270139	-0.0317255	-0.0525456	-0.0676894	-0.0607691	-0.0324513	-0.0341054
China	0.0347805	0.0279721	0.0377429	0.104908	-0.00140882	-0.00387466	-0.136549	-0.160588	-0.117017	-0.152811	-0.149785	-0.147757	-0.17634	-0.233747	-0.128156	-0.313485	-0.315844	-0.316403	-0.342305	-0.361515	-0.36161
Hong Kong	-0.880497	-0.972279	-0.975303	-0.883894	-0.938829	-0.951536	-0.955411	-0.934747	-0.873575	-0.916588	-0.897366	-0.876507	-0.855021	-0.924838	-0.883683	-0.905474	-0.899486	-0.885151	-0.905583	-0.919428	-0.917327
Macao	-0.644501	-0.777108	-0.773031	-0.628703	-0.757562	-0.748747	-0.691248	-0.671678	-0.720309	-0.659231	-0.963331	-0.978893	-0.997035	-0.980401	-0.707726	-0.70499	-0.978295	-0.976857	-0.981442	-0.970265	-0.948399
Colombia	0.00964344	-0.00249048	-0.000615071	0.0111742	0.0296564	0.0298476	0.0488683	0.0399599	0.045306	0.0858143	0.0752631	0.085436	0.0784767	0.107232	0.0581122	0.0454897	0.0388052	0.10425	0.0927588	0.0643773	0.0681076
Comoros	-0.0722611	-0.0630284	-0.0516363	-0.0121937	-0.155898	-0.0814758		-0.0495515	-0.139321	-0.155118	-0.182971	-0.25155	-0.174716	-0.240737	-0.171423	-0.613115	-0.225121	-0.230813
Congo Republic	0.118176	0.143641	0.172441	0.126807	0.262155	0.282518	0.283319	0.267725	0.243104	0.269822	0.284645	0.288076	0.288571	0.270274	0.268602	0.265793	0.191716	0.275849	0.1824	0.158193	0.184052
Cook Islands	-0.124372	-0.0946228	-0.103687	-0.0760298	-0.0851766	-0.37966	-0.161522		-0.150539									0.0552561		0.0589215	0.0920165
Costa Rica	0.0267402	0.171306	0.160768	-0.00563509	0.105529	0.149329	0.13569	0.104022	0.0849604	0.118072	0.134088	0.10036	0.053007	0.0732325	0.177286	0.12065	0.121854	0.0568042	0.0272199	0.0402	0.0372598
Croatia	-0.0440017	-0.0419476	-0.114279	-0.0529468	0.0053574	-0.0321621	-0.0629975	-0.123019	0.0546297	-0.0530023	-0.0838897	-0.0673562	-0.00205547	-0.0459052	0.0729831	-0.0683199	-0.0926355	-0.0124009	-0.0448866	-0.0352804	0.0160735
Cuba	-0.0735037	-0.0837624	-0.0567108	-0.0531026	-0.0772364	-0.0208273	0.0167687	-0.0549705	-0.0177765	-0.0510644	-0.0816869	-0.188472	-0.0825272	-0.154022	-0.090135	-0.120478	-0.0897747	-0.0999991	-0.147584	-0.142261	-0.130666
Curacao											-0.279442	-0.27971	-0.227219	-0.244138	-0.247151	-0.192978	-0.596933	-0.560211	-0.778742	-0.833355	-0.821287
Cyprus	-0.266993	-0.259557	-0.233252	-0.302444	-0.306689	-0.292365	-0.470239	-0.462694	-0.358956	-0.292085	-0.246945	-0.217379	-0.226098	-0.240375	-0.157823	-0.148925	-0.150671	-0.125612	-0.058537	-0.0429635	-0.0603529
Czech Republic	-0.0260284	-0.0511832	-0.0261982	-0.0564456	-0.028751	-0.00471949	-0.0239629	-0.0583769	-0.0726627	-0.0886398	-0.0449935	-0.0657432	-0.167595	-0.0793938	-0.0801206	-0.0560572	-0.0656684	-0.0556104	-0.0478677	-0.0449436	-0.0536078
Cote d'Ivoire	0.108311	0.128457	0.117196	0.112273	0.123896	0.0927713	-0.186547	-0.0999997	-0.125164	-0.0846718	0.186138	0.0753822	0.0040945	0.0811896	0.23828	0.0249988	-0.0328415	-0.0412681	0.203854	0.190761	0.18144
North Korea	0.0147603	0.0168829	0.0230547	0.0103224	0.0137104	0.00478361	-0.0138134	0.00892509		-0.000438032	0.00563849	0.00506153	0.0198824	0.0325208	0.0108326	0.0165196	0.0110877	0.0126441	0.0163236	0.0414594	0.045121
DR Congo	0.0921611	0.123834	0.139929	0.0853332	0.214523	0.16675	0.278163	0.263072	0.251994	0.270411	0.248005	0.250698	0.282474	0.266201	0.226621	0.283916	0.260374	0.264577	0.249263	0.204838	0.203032
Denmark	-0.480405	-0.438086	-0.365921	-0.37828	-0.355328	-0.322484	-0.241991	-0.282991	-0.298918	-0.318558	-0.301668	-0.35218	-0.327348	-0.304461	-0.301188	-0.242018	-0.212252	-0.216747	-0.198923	-0.183107	-0.17607
Djibouti	0.0778264	0.0757981	0.0879947	0.0746803	-0.0148867	0.253374	-0.639869	-0.656393	-0.694189	-0.643548	-0.546781	-0.295849	-0.117854	-0.000127823		0.115761	-0.0506201	-0.160837	-0.0895603	-0.414919	-0.455583
Dominica	-0.0307945	-0.0454205	-0.0549664	-0.0125147		-0.159695	0.220197	0.0759986	0.03328	0.0895575	-0.0587272	0.108098	-0.0209404	-0.151191	-0.0744676	-0.180186	-0.0935541	-0.0368302	0.120783	-0.0460342	-0.152522
Dominican Republic	-0.109554	-0.133242	-0.14729	-0.0901698	-0.193798	-0.149979	-0.0464907	-0.128301	-0.140904	-0.08809	-0.184157	-0.173666	-0.258511	-0.229964	-0.265748	-0.262857	-0.237567	-0.265745	-0.29399	-0.274954	-0.307202
Ecuador	0.0592063	0.134619	0.0913161	0.0331415	0.225467	0.207066	0.186916	0.125168	0.13961	0.192119	0.188199	0.203417	0.236485	0.300743	0.0976385	0.202165	0.253163	0.272965	0.278406	0.283847	0.294717
Egypt	-0.513044	-0.505425	-0.529414	-0.584015	-0.627896	-0.685753	-0.651015	-0.657971	-0.453881	-0.509248	-0.535622	-0.545142	-0.572612	-0.63642	-0.560348	-0.691188	-0.679336	-0.693429	-0.618365	-0.683229	-0.692293
El Salvador	-0.283792	-0.273347	-0.266976	-0.259183	-0.316221	-0.297516	-0.246551	-0.258382	-0.316183	-0.256183	-0.221216	-0.249381	-0.270592	-0.255786	-0.216657	-0.178023	-0.17315	-0.162878	-0.121114	-0.12879	-0.151854
Equatorial Guinea	0.242603	0.712278	0.760912	0.681839	0.748919	0.497843	0.516694	0.669232	0.566042	0.462837	0.599559	0.602806	0.465497	0.436916	0.362403	0.346994		0.243013	0.476392	0.386756	0.456941
Eritrea	0.0441338	0.066795	0.0742167	0.031795	0.0245994	0.0183341	0.0225777	0.0155924	-0.0341187	-0.0325956	-0.0118995	0.0129561	0.00887436	0.0469429	0.0816222	0.0390262	0.0153947	0.0665335	0.0532444	0.0495701	0.0319412
Estonia	0.108051	0.101171	0.0706907	0.0273227	0.048951	0.0557218	-0.065024	-0.0686242	-0.125555	-0.176827	-0.140701	-0.145379	-0.081138	0.129253	0.269063	0.242369	0.24032	0.241981	0.204917	0.228958	0.233356
Ethiopia	0.0231308	0.0179457	0.0253131	0.0262687	0.0212407	0.026354	0.0725609	0.0672201	0.0589765	0.0655663	0.0552291	0.0536426	0.0507503	0.0252342	0.0254809	0.0471653	0.0580675	0.0515339	0.0494553	0.0495433	0.0384931
Fiji	-0.126675	-0.101724	-0.107507	-0.105304	-0.0213191	0.051987	-0.0340743	0.062675	0.0989189	0.108989	0.194958	-0.00993115	-0.0211668	0.0707481	0.238451	0.0644805	-0.0976678	0.065779	0.0834778	0.0876413	0.0344346
Finland	-0.0411046	0.00842013	0.018507	-0.397986	-0.112287	-0.414077	-0.346498	-0.348321	-0.340869	-0.345056	-0.37978	-0.348875	-0.282651	-0.40445	0.0923253	-0.191228	-0.201411	-0.166627	-0.255335	-0.246824	-0.252328
Netherlands Antilles	-0.775242	-0.712241	-0.680649	-0.746355	-0.734833	-0.636656	-0.641869	-0.676088	-0.700112	-0.661851	-0.653212	-0.660477	-0.721186	-0.617525	-0.683452	-0.917271	-0.692289	-0.620832
France	-0.362633	-0.343155	-0.321324	-0.283151	-0.369101	-0.328487	-0.308519	-0.332893	-0.314189	-0.34962	-0.39796	-0.260049	-0.369545	-0.356301	-0.317566	-0.293682	-0.236506	-0.179823	-0.204243	-0.206927	-0.20006
French Polynesia	-0.790527	-0.80445	-0.789383	-0.762096	-0.789635	-0.770336	-0.72045	-0.762968	-0.780542	-0.837975	-0.828206	-0.853634	-0.877208	-0.873508	-0.884675	-0.851354	-0.822109	-0.847975	-0.824539	-0.824146	-0.81074
Gabon	0.185335	0.17361	0.246185	0.124964	0.385863	0.324705	0.44455	0.410163	0.466397	0.418043	0.454433	0.455795	0.4768	0.441363	0.520821	0.432866	0.38813	0.412177	0.291418	0.275684	0.296353
Gambia									-0.0018629	-0.0111638	-0.0423158	-0.0602022			-0.00696759	0.0197504	0.0611732	0.0893473	0.098933	0.0562484	0.0922869
Georgia	0.0210795	0.0229729	0.00997955	-0.0275499	0.0844874	0.0221279	0.124806	0.115073	0.18848	0.0105454	0.0127822	-0.0481311	-0.0881959	0.00570752	0.0244061	-0.017044	-0.0945104	0.0401293	-0.0302235	0.0179775	0.0115309
Germany	-0.45079	-0.455159	-0.434114	-0.391671	-0.469387	-0.432821	-0.466181	-0.445134	-0.457463	-0.453556	-0.405088	-0.412159	-0.384748	-0.396629	-0.366309	-0.361959	-0.373577	-0.347869	-0.347233	-0.344213	-0.346999
Ghana	0.0452644	0.0467987	0.044489	0.0711434	0.0454439	0.107984	0.158167	0.136142	0.0808267	0.0904178	-0.0590399	-0.0392941	0.121391	0.123657	0.143234	0.114461	0.146288	0.119091	0.128999	0.193161	0.193308
Greece	-0.15552	-0.213707	-0.200102	-0.211425	-0.270297	-0.297532	-0.32026	-0.345893	-0.337087	-0.325269	-0.300797	-0.291352	-0.326464	-0.303492	-0.244052	-0.152908	-0.184466	-0.0880567	-0.0508095	-0.035411	-0.0373269
Greenland	-0.0214969	-0.0233243	-0.0264308	-0.0145018	-0.0206149	-0.00562122	-0.00190951	-0.00249435	-0.0121055	-0.00523128	-0.00522613	-0.00946218	-0.0054311	-0.0127921	-0.0113084	-0.0118972	-0.0125561	-0.00768977	-0.00794409	-0.0064949	-0.00657589
Grenada	-0.220648	-0.256393	-0.282789	-0.348373	-0.133221	-0.442905	-0.331408	-0.315628	-0.120665	-0.459083	-0.650294	-0.588218	-0.638565	-0.637686	-0.508478	-0.577075	-0.639574	-0.561402	-0.560968	-0.460826	-0.518431
Guatemala	0.0975775	0.228473	0.216453	0.0960955	0.207217	0.226687	0.251185	0.171137	0.161272	0.219474	0.152422	0.182729	0.127944	0.119699	0.121107	0.153186	0.149968	0.106964	0.0861762	0.0758763	0.0532509
Guinea	0.0252507	0.020581	0.0231221	0.0256392	0.0410652	0.0305524	0.063368	0.0310841	0.0152098	0.0184238	0.0399529	0.0433817	0.0304872	0.0660208	0.0421189	0.0548143	0.0349516	0.037171	0.0288342	0.0381015	0.0385064
Guinea-Bissau	0.005495	0.0132953	0.0328654	0.0238333	0.0410488	0.0734502	0.0743819	0.0447061	0.05497	0.0462294	0.0465843	0.0358341	0.0573685	0.054819	0.0547378	0.0741884	0.0996305	0.0709975	0.0765771	0.101713	0.135291
Guyana	0.0988297	0.100869	0.0957861	0.103726	0.097145	0.0697824	0.126422	0.228204	0.115177	0.110377	0.0683744	0.076227	0.0613125	0.062725	0.0811715	0.0457533	0.0424659	0.0474757	0.216703	0.220747	0.21524
Haiti	-0.00230367	0.0204108	0.022729	-0.00138352	0.011201	0.0238136	-0.0142017	-0.0344647	0.0117125	-0.102668	-0.0947756	-0.139106	0.0237415
Honduras	0.170015	0.292515	0.336183	0.185138	0.312774	0.232851	0.274498	0.197958	0.282094	0.272606	0.341615	0.340513	0.312364	0.31476	0.266475	0.348006	0.32737	0.289818	0.347461	0.314929	0.298483
Hungary	0.0422904	0.00643246	-0.00653979	-0.0719309	-0.0657869	-0.0401274	-0.0102109	-0.0409126	-0.0715708	-0.0893378	-0.0461632	0.0205835	0.0652161	0.0616698	0.12401	0.140964	0.106379	0.169713	0.161586	0.128796	0.117584
Iceland	0.176475	0.22351	0.227413	0.163144	0.199574	0.173883	0.113997	0.341412	0.297032	0.299126	0.223914	0.238785	0.231901	0.298039	0.426372	0.389334	0.406549	0.411622	0.33855	0.312507	0.319502
India	0.0007282	-0.00765407	-0.00571839	0.0304529	-0.0148334	-0.0208983	-0.0288914	-0.0338695	-0.036291	-0.00918758	-0.0262354	-0.0454187	-0.0644929	-0.0677299	-0.0730301	-0.0696753	-0.0838721	-0.0653887	-0.0625195	-0.078832	-0.086936
Indonesia	0.132715	0.141695	0.127164	0.193901	0.246704	0.188927	0.207235	0.145891	0.125413	0.143889	0.160196	0.0983582	0.0600137	0.00503638	-0.0386814	-0.0623129	-0.0629978	-0.0559955	-0.066529	-0.13348	-0.135596
Iran	0.062803	0.0664762	0.0469391	-0.0157922	-0.000982114	-0.0486628	0.00698513	-0.00419973	0.0848891	0.080978	0.0555041	0.0483883	0.107463	-0.0119957	-0.154705	-0.00828724	0.0135742	-0.199256	-0.109039	-0.113786	-0.0895598
Iraq	0.0998445	0.0674218	0.187422	0.0409127	0.0360657	-0.0105076	0.0317632	0.10199	-0.0423486	-0.0486675	-0.149822	-0.225437	-0.078596	-0.156342	-0.358694	-0.345167	-0.304661	-0.23554	-0.195924	-0.206526	-0.199101
Ireland	0.0559433	0.0429073	0.0491665	0.0351018	-0.0167812	-0.0074811	-0.0199508	0.0169811	-0.0159082	-0.00178133	0.0337682	-0.0119654	-0.0135553	0.0344115	0.0585453	0.102867	0.122833	0.0872322	0.0850782	0.0555071	0.0269842
Israel	-0.742151	-0.771271	-0.766057	-0.779163	-0.749538	-0.748976	-0.63561	-0.65324	-0.636221	-0.644351	-0.666301	-0.692085	-0.601323	-0.647758	-0.57656	-0.529834	-0.512976	-0.507967	-0.544753	-0.554359	-0.577084
Italy	-0.448796	-0.448623	-0.452162	-0.458352	-0.517454	-0.536343	-0.556721	-0.552001	-0.567894	-0.587483	-0.564931	-0.600892	-0.566067	-0.506686	-0.454314	-0.432127	-0.427639	-0.368167	-0.376647	-0.373089	-0.371913
Jamaica	-0.116516	-0.180358	-0.172821	-0.127096	-0.134034	-0.260356	-0.228179	-0.322946	-0.337635	-0.488934	-0.358461	-0.317174	-0.345314	-0.407405	-0.310684	-0.340771	-0.294593	-0.296343	-0.339104	-0.313846	-0.380299
Japan	-0.698156	-0.696547	-0.673537	-0.742513	-0.707037	-0.772183	-0.800371	-0.750334	-0.77324	-0.799608	-0.786519	-0.752642	-0.743432	-0.750967	-0.657051	-0.697101	-0.689341	-0.681689	-0.66302	-0.641452	-0.631493
Jordan	-0.589497	-0.481005	-0.491745	-0.60291	-0.477652	-0.522994	-0.591131	-0.564648	-0.55136	-0.630387	-0.606738	-0.591725	-0.6796	-0.537415	-0.523312	-0.613464	-0.489183	-0.453986	-0.371586	-0.422515	-0.410589
Kazakhstan	0.238311	0.220432	0.214338	0.206678	0.212136	0.273305	0.267278	0.273718	0.300789	0.276202	0.254529	0.263237	0.257839	0.294114	0.1814	0.23569	0.248966	0.223058	0.181909	0.214554	0.126979
Kenya	0.0481059	0.0521347	0.0467839	0.0400659	0.0496502	0.0375638	0.0437955	0.0197101	0.0427961	0.057636	0.0394416	0.0340907	-0.0155979	0.0184379	-0.00978293	-0.0214331	-0.0420502	-0.0126792	-0.00514586	-0.0364822	-0.03504
Kiribati	-0.488503	-0.491326	-0.429653	-0.352044	-0.428798	-0.53771		-0.301683	0.0926792	-0.315067		-0.123216	-0.19958	0.0710301	-0.272278	-0.29781	-0.485326	-0.208404	-0.0149384	0.295555	-0.166363
Kosovo	-0.306071	-0.190627	-0.199064	-0.138654	-0.0788044	-0.159525	-0.179983	-0.154811	-0.196138	-0.162358	-0.122526	-0.108334	-0.116576	-0.118489	-0.105264	-0.10255	-0.122136	-0.0670926	-0.0879721	-0.0808082	-0.0988114
Kuwait	-0.888006	-0.897143	-0.855689	-0.91107	-0.888007	-0.868346	-0.739819	-0.787016	-0.84775	-0.831948	-0.709792	-0.701669	-0.70995	-0.71071	-0.772117	-0.724149	-0.73244	-0.728486	-0.701094	-0.707084	-0.724496
Kyrgyz Republic	0.0639419	0.0310634	0.0961561	0.0554618	0.141768	0.117106	0.0836045	0.0511423	0.0482211	0.0909069	0.0630124	0.0422584	0.0510077	0.0346013	0.108878	0.0947116	0.0405209	0.0473377	0.0377621	-0.0286766	-0.0278011
Laos	0.102825	0.120113	0.134767	0.124163	0.162394	0.171039	0.195235	0.211451	0.186276	0.225815	0.262176	0.25464	0.296514	0.233343	0.115013	0.160126	0.0633116	0.137693	0.208014	0.215642	0.218443
Latvia	0.122702	0.115245	0.083837	0.056326	0.0164441	-0.00172032	0.151925	0.0796317	0.0751167	-0.0712754	-0.0614683	-0.0826155	-0.104421	0.0468298	0.206041	0.243073	0.223328	0.130168	0.20049	0.101944	0.0987311
Lebanon	-0.602856	-0.617638	-0.640613	-0.617219	-0.687605	-0.614874	-0.681408	-0.658331	-0.671346	-0.651367	-0.693121	-0.673763	-0.664007	-0.659416	-0.650896	-0.707924	-0.675799	-0.691076	-0.668411	-0.650597	-0.650237
Lesotho	-0.0878409	-0.0793461	-0.0544304	-0.046492	-0.0354336	-0.0774744	-0.114619	-0.0935068	0.0900889	0.0748828	0.0897017	0.0592889	0.0210104	0.13879	0.140819	0.123414	0.123443	0.107216	0.125398	0.13883	0.16421
Liberia	0.187416	0.152289	0.141194	0.151692	0.392916	0.340797	0.367771	0.368303	0.491187	0.0702592	0.0663369	0.0494352	0.0703881	0.0542586	0.040821	0.0548594	0.128692	0.182609	0.178296	0.205341	0.212817
Libya	-0.360588	-0.464405	-0.440759	-0.370241	-0.163583	-0.0680622	-0.028285	-0.191153	-0.0448183	-0.200125	-0.15302	0.0200163	-0.213291	-0.241651	-0.421951	-0.512616	-0.288434	-0.377975	-0.360667	-0.273177	-0.306664
Liechtenstein				-0.791794	-0.708502				-0.722423
Lithuania	0.0436588	-0.0143173	-0.0582398	-0.0176103	-0.0498418	0.0135463	-0.0141939	0.0079091	0.0452455	0.0235545	0.0427401	0.0290046	0.0184119	0.0284163	0.040606	0.0498598	0.0426819	0.0870364	0.0632774	0.0687644	0.049866
Luxembourg	-0.579566	-0.542586	-0.540445	-0.50412	-0.49835		-0.365151	-0.303208	-0.284149	-0.293018	-0.237637	-0.226745	-0.230824	-0.231208	-0.191384	-0.216235	-0.219068	-0.221052	-0.223669	-0.222163	-0.221188
Madagascar	0.0754414	0.059578	0.0746584	0.027779	0.169994	0.209322	0.214445	0.182732	0.0918882	0.14845	0.164342	0.221268	0.156593	0.210105	0.0969808	0.141444	0.117362	0.1326	0.133799	0.144244	0.150402
Malawi	0.0195532	-0.0234773	-0.0511506	0.0295999	-0.0794332	-0.0605083	-0.013236	-0.159288	0.0157613	-0.04686	-0.0588451	-0.0107347	0.0568159	-0.00112342	-0.0353326	-0.028271	0.0729477	0.0498818	0.0638951	0.0577228	0.0871764
Malaysia	-0.0641866	-0.0769927	-0.0622407	0.0104924	0.00333964	-0.0988957	-0.0395313	-0.038193	0.111434	0.0847598	0.0986326	0.0455623	0.0390617	0.0466818	0.115272	0.0610881	0.0270588	0.00159416	-0.101981	-0.113527	-0.11399
Maldives							-0.199662	-0.051076	-0.477865	-0.52252	-0.656315	-0.80486	-0.820021	-0.835625	-0.841878	-0.824024	-0.569472	-0.721001	-0.791088	-0.789506	-0.774198
Mali	0.0726369	0.06413	0.0879711	0.0753724	0.0856085	0.100886	0.399973	0.416048	0.399752	0.321073	0.242369	0.326807	0.360055	0.29369	0.088864	0.299434	0.297411	0.318025	0.116664	0.11349	0.108864
Malta	-0.673883	-0.817048	-0.822435	-0.788457	-0.837478	-0.819052	-0.763737	-0.712518	-0.70584	-0.679987	-0.659039	-0.693425	-0.677625	-0.666048	-0.66749	-0.689326	-0.645867	-0.703034	-0.653895	-0.689894	-0.693743
Marshall Islands	-0.273112	-0.240097	-0.220898		-0.173926	-0.100301	-0.125412	-0.130022	-0.0955547	-0.0917639	-0.242053	-0.0917146	-0.0544521	-0.0382142	-0.0476279	-0.0487449	-0.0484363	-0.0560361	-0.0378317	-0.0445826	-0.037881
Mauritania	0.133239	0.155242	0.13693	0.194352	0.140666	0.145935	0.157431	0.150368	0.0581615	0.082137	0.0970238	0.0662637	0.0635082	0.0349441	0.0828231	0.126646	0.0388014	0.10647	0.0844593	0.140976	0.156853
Mauritius	-0.63236	-0.634119	-0.649646	-0.604877	-0.637274	-0.67441	-0.448056	-0.507477	-0.600908	-0.651401	-0.672498	-0.650626	-0.650153	-0.658474	-0.655426	-0.680339	-0.67462	-0.687608	-0.659898	-0.64423	-0.641228
Mexico	0.0409582	0.0353449	-0.0140737	-0.0779241	-0.0197661	-0.0895276	-0.0761437	-0.0724527	-0.0389822	-0.0608074	-0.0667185	-0.0549156	-0.0640696	-0.0738692	-0.033489	-0.0207028	-0.0170335	-0.00557164	0.0461959	0.0700564	0.0874901
Micronesia, Fed. Sts.	-0.319937		-0.36796	-0.359159	-0.344852	-0.304193	-0.386545	-0.348316	-0.426033	-0.379075	-0.345375	-0.797821	-0.734259	-0.52756	-0.2838	-0.329201	-0.241231	-0.10528	-0.123573	-0.225739	-0.249398
Monaco																				-0.424538	-0.378855
Mongolia	0.1874	0.160798	0.256848	0.196588	0.26939	0.261322	0.35447	0.346489	0.421286	0.349004	0.289856	0.436534	0.415123	0.290569	0.403217	0.486141	0.333859	0.246925	0.220924	0.330258	0.293191
Montenegro	0.0557681	0.148824	0.151535	0.0695076	0.113845	0.101613	0.142697	0.195794	0.158076	0.211969	0.265056	0.140868	0.108466	-0.017853	0.0132538	-0.0275454	-0.0574447	-0.0642699	-0.0452643	-0.0471755	-0.0609945
Montserrat	-0.185189	-0.0777848		-0.219233	0.0230505	-0.1595	-0.12626	-0.22987	-0.291379	-0.363076	-0.101217	-0.156327	-0.183973	-0.314558	-0.135649	-0.0627364	-0.093909	-0.145738	-0.179818	-0.157541	-0.245696
Morocco	0.0690799	0.0566879	0.0545679	0.0522416	0.0669882	0.0319429	0.00101209	-0.0734598	-0.00356005	-0.0628476	-0.0619337	-0.0424725	-0.0943469	-0.0701682	-0.0704275	-0.0612516	-0.045156	-0.0254526	-0.0253182	-0.0382643	-0.0319131
Mozambique	0.0442404	0.067684	0.0561203	0.0464005	0.114252	0.0127156	0.11088	0.144201	0.142701	0.232352	0.0885016	0.09433	0.221204	0.14669	0.123355	0.233232	0.136254	0.158254	0.157279	0.186241	0.182185
Myanmar	0.0694647	0.0769655	0.0804699	0.0660384	0.129532	0.163462	0.17302	0.171411	0.122609	0.20104	0.21916	0.244351	0.272879	0.237358			0.108951	0.125838	0.204239	0.187316	0.189737
Namibia	0.16469	0.196461	0.187554	0.144621	0.192119	0.180742	0.317956	0.193414	0.224116	0.183565	0.23556	0.193777	0.191737	0.263191	0.209524	0.206882	0.216196	0.22355	0.270841	0.271085	0.23685
Nauru		-0.892728	-0.859191	-0.792431	-0.824341		-0.887991		-0.877328			-0.717051	-0.64614	-0.739802	-0.697845	-0.875987	-0.853712	-0.797183	-0.914288	-0.907044	-0.959709
Nepal	0.109774	0.0883491	0.106898	0.093611	0.0791237	0.081049	0.178205	0.165869	0.0739272	0.122324	0.105825	0.0900208	0.264954	0.129691	0.125033	0.0724848	0.0582567	0.0578808	0.0661088	0.0462198	0.0581493
Netherlands	-0.62256	-0.631802	-0.613898	-0.585662	-0.557344	-0.548894	-0.287636	-0.286423	-0.298396	-0.298411	-0.387985	-0.293152	-0.279761	-0.268416	-0.303291	-0.272424	-0.260648	-0.264181	-0.272783	-0.270054	-0.269399
New Caledonia			-0.0645028	-0.0192091	-0.0393706	-0.0576003	-0.0713937	-0.0691271	0.00495974	-0.0802895	-0.0867388	-0.0877058	-0.202532	-0.197639	-0.176259	-0.223821	-0.196564	-0.158297	-0.165897	-0.113171	-0.112423
New Zealand	0.139919	0.18031	0.182508	0.190602	0.205853	0.210326	0.179346	0.17401	0.17674	0.204988	0.17198	0.213834	0.171766	0.216399	0.232362	0.19195	0.217725	0.226281	0.176107	0.167795	0.185842
Nicaragua	0.222849	0.223853	0.162627	0.148344	0.194113	0.248722	0.286889	0.264913	0.291294	0.376172	0.327147	0.258342	0.23682	0.235429	0.214225	0.368102	0.322579	0.354206	0.38137	0.423143	0.396163
Niger	0.2444	0.245208	0.230366	0.182065	0.190213	0.228011	0.250163	0.260676	0.263099	0.254939	0.258835	0.223302	0.20269	0.276813	0.270844	0.234376	0.248488	0.206894	0.265921	0.222346	0.198736
Nigeria	0.0358054	0.0234012	0.0498157	0.0145992	0.0592092	0.101912	0.0743602	0.0442113	-0.0063884	0.045818	0.0333433	0.0910714	-0.00696337	0.0152418	-0.0257225	-0.0111326	-0.0768214	0.157903	0.0226034	0.0453625	0.0634939
Norway	-0.00224907	-0.0211504	-0.0298241	-0.134644	-0.0341474	-0.114057	-0.0976985	-0.130971	-0.0605676	-0.0565493	-0.066127	-0.0439723	-0.0060676	-0.00469697	0.0441819	0.010379	0.0191069	0.00894956	0.0849946	0.110271	0.133194
Oman	-0.379	-0.290778	-0.326629	-0.343276	-0.301735	-0.20848	-0.194147	-0.0971354	-0.20224	-0.116432	-0.169699	-0.185688	-0.372767	-0.408543	-0.194692	-0.18913	-0.176574	-0.184461	-0.176793	-0.244477	-0.210124
Pakistan	0.0145738	0.0236733	0.0230914	0.0150807	0.0179377	0.0395097	0.111477	0.159303	0.0998438	0.0428106	0.01593	-0.00675325	0.0260487	-0.0422092	0.00109225	0.0231548	0.107175	0.0446613	0.0266786	-0.0153455	-0.0215129
Palau	-0.593808			-0.470926		-0.374799	0.0307775	0.0837669	0.119983	0.0671109	-0.222011	-0.146994	-0.214503	-0.256397	-0.33717	-0.120846	-0.111786	0.0696226	0.10811	0.0666623	-0.00636132
Panama	0.144154	0.134313	0.157164	0.124118	0.123851	0.0843512	0.308642	0.26959	0.364961	0.283537	0.331209	0.308332	0.296432	0.263035	0.263973	0.237076	0.214397	0.18867	0.113719	0.0825124	0.0694412
Papua New Guinea	0.178331	0.197225	0.208683	0.0697387	0.248588	0.264254	0.290602	0.286756	0.422817	0.380644	0.413533	0.424503	0.460549	0.456985	0.449535	0.26229	0.155349	0.20013	0.249147	0.276852	0.317585
Paraguay	0.240502	0.346222	0.331282	0.258129	0.336676	0.284915	0.351949	0.433082	0.410231	0.414422	0.457007	0.475512	0.49884	0.427873	0.429824	0.4148	0.39734	0.392066	0.40573	0.34467	0.34309
Peru	0.00741406	0.00924408	0.0139504	0.0138166	0.0439546	0.0476916	0.0747675	0.069658	0.0470917	0.0849319	0.107357	0.121329	0.0897327	0.0886323	0.0798408	0.10215	0.0938356	0.0674066	0.0255815	0.0235383	0.0430302
Philippines	-0.190286	-0.264119	-0.294594	-0.256447	-0.25965	-0.269748	-0.153149	-0.182769	-0.122099	-0.074598	-0.0624976	-0.169795	-0.086955	-0.10333	-0.091035	-0.0955597	-0.126817	-0.151995	-0.135458	-0.159016	-0.186649
Poland	0.0179428	-0.016062	-0.0328412	-0.0699197	-0.0582897	-0.086676	-0.0946154	-0.0314529	-0.0188638	-0.0360022	-0.0713952	-0.0604374	-0.0699211	-0.090282	-0.0191336	-0.0232304	-0.0205761	0.00977111	0.0460177	0.01346	4.47913e-05
Portugal	-0.394832	-0.549606	-0.637217	-0.516912	-0.712622	-0.740298	-0.683329	-0.656344	-0.578903	-0.614326	-0.606445	-0.604305	-0.531158	-0.543672	-0.50662	-0.465312	-0.395369	-0.332455	-0.359956	-0.329482	-0.32196
Puerto Rico	-0.596446	-0.561958	-0.523705	-0.589018	-0.564051	-0.566507	-0.569205	-0.607342	-0.62847	-0.606817	-0.595413	-0.5688			-0.619652			-0.664442	-0.716538	-0.713717	-0.772364
Qatar	-0.799031	-0.793974	-0.794301	-0.72818	-0.677849	-0.762184	-0.674597	-0.689523	-0.743099	-0.754327	-0.778613	-0.807879	-0.793822	-0.793077	-0.72798	-0.799631	-0.814943	-0.809772	-0.780595	-0.808821	-0.821801
South Korea	-0.738331	-0.762615	-0.744461	-0.701951	-0.722465	-0.823389	-0.780918	-0.803231	-0.775378	-0.791526	-0.791993	-0.812775	-0.7958	-0.787534	-0.70977	-0.762561	-0.772547	-0.749466	-0.772515	-0.754196	-0.754471
Moldova	0.332718	0.281243	0.243397	0.249262	0.328129	0.241277	0.263316	0.294809	0.113466	0.141111	0.215978	0.207032	0.174103	0.133194	0.221435	0.254675	0.217907	0.233295	0.241444	0.221576	0.201535
Romania	0.0761439	0.0588901	0.0586143	0.0414403	0.0764322	0.13159	0.154242	0.140609	0.0653127	0.0819863	0.0605212	0.0631398	0.0833667	0.0872044	0.116824	0.0813138	0.107604	0.121648	0.168532	0.178805	0.185146
Russia	5.85251e-05	0.00562177	0.000470348	0.100521	0.0478048	0.229151	0.222914	0.269551	0.190184	0.220454	0.236544	0.228172	0.259884	0.230749		0.186132	0.197907	0.15209	0.182456	0.206475	0.286756
Rwanda	-0.180807	-0.222815	-0.285961	-0.144866	-0.137165	-0.0746407	-0.0421435	-0.202857	-0.0794136	-0.101782	-0.182674	-0.080539	-0.106263	-0.12075	-0.219507	-0.156633	-0.208164	-0.240804	-0.216541	-0.21936	-0.23132
St. Kitts and Nevis	-0.23611	-0.278777	-0.279761	-0.310803	-0.16471	-0.445411	-0.22269	-0.29138	-0.466136	-0.528915	-0.37461	-0.555643	-0.50553	-0.57877	-0.587302	-0.487471		-0.39025	-0.418336	-0.425363	-0.505249
St. Lucia	-0.247115	-0.401559	-0.462625	-0.372918	-0.124401	-0.415913	-0.0849029	-0.0262394	-0.443895	-0.169032	-0.431041	-0.35226	-0.474724	-0.298184	-0.143075	-0.333159	-0.34334	-0.321378	-0.446154	-0.278912	-0.340437
Samoa	-0.0800704	-0.0856831	-0.059533	-0.0788253	-0.0849724	-0.0196799	-0.0242372	-0.179244	-0.0408486	-0.0205032	-0.0202477	-0.0533279			-0.118601	-0.117707	-0.192674	-0.0823347	-0.0695927	-0.0539262	-0.131666
San Marino									-0.438986	-0.415261	-0.38703	-0.352019	-0.417263	-0.479725	-0.403886	-0.596293	-0.620123	-0.450959	-0.453169	-0.43386	-0.390357
Sao Tome and Principe	-0.0151125	-0.0297443	0.0298177	0.0948601	0.0992725	0.0228152	0.1646	0.0200521	0.0233296	-0.180136	0.0490967	-0.0566276	0.0901117	-0.0295826		-0.19679	0.0211289	0.0642697	-0.0165863	-0.00906705	-0.0247123
Saudi Arabia	-0.158142	-0.199691	-0.194458	-0.213747	-0.5061	-0.515242	-0.3643	-0.41677	-0.423153	-0.40116	-0.384521	-0.442176	-0.427198	-0.415062	-0.526161	-0.46545	-0.515968	-0.429936	-0.34424	-0.351019	-0.317602
Senegal	0.0456955	0.0346623	0.0314613	0.0329554	0.0172838	0.0304781	-0.0999031	-0.251163	-0.0989551	-0.133503	-0.222464	-0.188728	-0.277577	-0.266771	0.0195217	-0.19829	-0.0941282	-0.145636	0.0672135	0.0500801	0.0523908
Serbia	-0.0767973	-0.169815	-0.176279	-0.12967	-0.0762781	0.0128166	0.0787688	0.0624204	0.0818146	-0.0139742	0.0761502	-0.0273737	0.0300297	-0.0740058	0.0163802	0.0362817	0.0644782	0.0733587	0.0401843	0.140093	0.134486
Seychelles	-0.71534	-0.711935	-0.704133	-0.705834	-0.72267	-0.60279	-0.588445	-0.665378	-0.688246	-0.593748	-0.635371	-0.732959	-0.564828	-0.590993	-0.668571	-0.654278	-0.663184	-0.706795	-0.729808	-0.786358	-0.791906
Sierra Leone	0.0699713	0.0497873	0.0420955	0.0492352	0.0430734	0.0412832	0.0344633	0.0375936	0.0598151	0.0857542	0.0638283	0.0626304	0.0683535	0.0613566	0.0777363	0.143432	0.129083	0.173172	0.23731	0.233005	0.236545
Singapore	-0.986048	-0.995271	-0.988868	-0.991889	-0.994613	-0.994463	-0.995094	-0.9959	-0.978857	-0.991536	-0.990076	-0.991053	-0.988817	-0.988049	-0.982139	-0.994602	-0.994477	-0.997205	-0.991309	-0.993694	-0.992429
Sint Maarten											0.315742	0.149601	-0.165678	0.240756	0.188755	-0.0498618	-0.777077	-0.719455	-0.667956	-0.715147	-0.655445
Slovakia	0.0829937	-0.0667972	-0.0906401	-0.0640471	-0.0653426	-0.0259354	-0.0490757	0.0221071	-0.135625	0.0337941	0.0495863	0.0373419	-0.0171514	-0.0225599	0.0958387	0.0876213	0.0659931	0.0756205	0.0871225	0.1046	0.0920188
Slovenia	-0.160614	-0.162711	-0.112592	-0.196355	-0.227134	-0.292026	-0.168726	-0.140587	-0.287511	-0.429364	-0.403742	-0.482975	-0.414779	-0.321033	-0.404065	-0.264584	-0.176672	-0.161493	-0.139141	-0.0804866	-0.0834939
Solomon Islands	0.185008	0.18485	0.183191	0.19343	0.210698	0.196487	0.198636	0.2212	0.585137	0.483774	0.198962	0.504047	0.329595	0.590632	0.598937	0.360827	0.238866	0.413235	0.323663	0.322453	0.2871
Somalia	0.00176558	0.00165852	0.00149734	0.000779798	0.0135389	0.0256441	0.000736375	0.00406374	-0.000986254	0.0124247	0.0219725	0.0152262	0.0126255	0.0129665	0.0217957	0.029035	0.027753	0.0280088	0.0427134	0.0168287	0.0151184
South Africa	0.0371168	0.0274366	0.0311109	0.0312039	0.0337318	-0.0111749	-0.108413	-0.0998266	0.02637	0.0161058	0.0513604	0.0325927	0.0345094	0.144852	0.127604	0.132608	0.128366	0.128749	0.165978	0.181622	0.181747
South Sudan
Spain	-0.152319	-0.171893	-0.153948	-0.187187	-0.197408	-0.208417	-0.194482	-0.311655	-0.220047	-0.226708	-0.216482	-0.186499	-0.161686	-0.162604	-0.126183	-0.0805407	-0.0869781	-0.0705777	-0.0353318	-0.0113751	-0.0209996
Sri Lanka	-0.0570411	-0.0143971	-0.0269293	-0.114233	-0.0296619	-0.0552252	-0.00718516	0.0351719	0.124122	0.101639	0.115506	0.103173	0.102773	0.0595872	0.0550883	0.0269454	-0.099874	-0.0763507	-0.270237	-0.103463	-0.149174
St. Vincent and the Grenadines	-0.208293	-0.219042	-0.277975	-0.333809	-0.204973	-0.251286	-0.183859	-0.0257762	-0.0958596	-0.374876	-0.470807	-0.32208	-0.536173	-0.444364	-0.452674	-0.485956	-0.357258	-0.474997	-0.475411	-0.531486	-0.553959
Palestine	-0.868233	-0.877122	-0.880026	-0.865901	-0.90507	-0.801188	-0.856888	-0.87202	-0.896559	-0.884429	-0.886219	-0.867823	-0.773905	-0.801285	-0.740877	-0.768167	-0.768186	-0.767111	-0.707797	-0.724644	-0.684053
Sudan	0.0314147	0.0369289	0.0329542	0.0240158	0.149425	0.170216	0.0788203	0.168107	0.146184	0.1923	0.16918	0.166407	0.189366	0.212498	0.123678	0.183587	0.176067
Suriname	0.199114	0.330453	0.379796	0.338775	0.34197	0.199394	0.347681	0.304643	0.175861	0.206703	0.315576	0.40168	0.371662	0.386991	0.410155	0.400528	0.366499	0.395026	0.313373	0.314151	0.300806
Swaziland		-0.0142722	-0.00479862	-0.0589985	0.0136188	-0.101692	-0.113622	-0.177241	0.0365421	0.0323083	0.0678568	0.0312271	-0.041685	0.0519847	0.0829215	0.0558185	-0.00100269	0.0423803	0.0869154	0.120389	0.0816458
Sweden	0.0147819	0.0109674	0.0384048	-0.17087	0.0572077	-0.242941	0.122922	0.163814	-0.0273227	-0.0469349	-0.00123824	0.0332019	0.00966913	-0.00924069	0.14216	0.0417609	0.00893293	0.0264966	-0.0356286	-0.0333101	-0.044504
Switzerland	-0.314164	-0.339693	-0.289369	-0.279072	-0.290392	-0.21643	-0.344774	-0.371376	-0.351356	-0.331476	-0.313765	-0.316849	-0.280374	-0.297435	-0.276107	-0.256483	-0.296118	-0.282394	-0.278083	-0.257726	-0.255303
Syria	0.127252	0.164262	0.18264	0.130971	0.0133727	0.00597812	-0.0405082	0.00589693	-0.0897525	0.0307433	-0.0493251	0.000100798	0.0166804	-0.128177	-0.144609	-0.0901965	-0.0655267	0.0500419	0.0154297	0.0850385	0.10097
Macedonia	-0.0141708	-0.00844669	0.00651778	0.0127701	0.050944	0.00332686	0.0434311	-0.0129393	0.0194722	-0.0333602	0.0296293	0.0703848	0.0771575	0.0394684	-0.0178275	0.00380766	0.0380313	0.0405337	0.0229335	0.0225826	0.0220421
Tajikistan		0.0768184	0.0784621	0.00719082	0.14158	0.0810862	-0.13086	-0.0926587	-0.0259369	-0.118395	-0.158599	-0.0656153	-0.122704	-0.083496	-0.137024	-0.102036	-0.271077	-0.17032		-0.200998	-0.171195
Thailand	0.0581272	0.0509888	0.0889996	0.118517	0.0143138	0.00562646	0.0119592	-0.00942653	0.00986363	0.0157299	-0.135285	-0.0162868	-0.0182876	-0.029822	0.0333341	0.032758	0.0123382	-0.0040544	-0.00598904	0.0153204	0.0376527
Timor-Leste	0.0186294	-0.00205	-0.000336519	-0.0154226	-0.0028406	-0.447206		-0.0285509	-0.0014735	0.151669	0.118572	0.171977	0.131667	0.102968	0.0395081	0.118706	0.209852	0.280379	0.0861533	0.249346	0.272879
Togo	0.057646	0.0642619	0.0564825	0.0544433	0.0813856	0.0862388	0.150656		0.0680105	0.0617334	0.0927841	0.101712	0.131349	0.12718	0.122069	0.148624	0.146744	0.206943	0.168672	0.187992	0.18109
Tonga	-0.546186	-0.569869	-0.505511	-0.457972	-0.466097	-0.357097	-0.351548	-0.140082	-0.0897892	0.0279257	0.0958317	0.0807963	-0.24662	-0.199463	-0.225305	-0.192124	-0.258336	-0.138681	-0.0610014	-0.0713806	-0.185781
Trinidad and Tobago	-0.377494	-0.362749	-0.369011	-0.486575	-0.32419	-0.297028	-0.265021	-0.4034	-0.365627	-0.374391	-0.300767	-0.238113	-0.537563	-0.499258	-0.440776	-0.353596	-0.362982	-0.37656	-0.54339	-0.557431	-0.648184
Tunisia	-0.0138979	0.00827621	0.00831191	0.034947	0.0206505	-0.0249496	-0.0675865	-0.239914	-0.0856307	-0.166358	-0.187481	-0.16632	-0.351172	-0.254045	-0.107805	-0.161623	-0.129317	-0.107123	-0.0526849	-0.0649385	-0.0542662
Turkey	-0.0474289	-0.0821207	-0.085796	-0.128128	-0.0925867	-0.172944	-0.0773728	-0.133653	-0.144123	-0.205058	-0.194238	-0.206168	-0.231851	-0.249551	-0.126628	-0.209267	-0.266774	-0.237073	-0.210883	-0.182149	-0.188167
Turkmenistan	0.348299	0.346736	0.143371	0.16723			0.168217	0.143352	0.133311	0.193831	0.281371	0.356363	0.128802	0.151596	0.251934	0.289435	0.265727	0.298809	0.276949	0.195935	0.278876
Turks and Caicos Islands	-0.29763			-0.200769	-0.243372	-0.264234	-0.417366	-0.414787	-0.403353	-0.639847	-0.705627	-0.728463	-0.768668	-0.742332	-0.688383	-0.62721	-0.856367	-0.924822	-0.792931	-0.870353	-0.830753
Tuvalu			-0.355768	-0.534218		-0.729597			-0.411018	-0.474466	-0.495771	-0.168099	-0.817709	-0.393438	-0.54605		-0.460203				-0.461563
Tanzania	0.0539498	0.0409505	0.0335446	0.0221721	0.0202767	0.0363472	0.0827082	0.0761615	0.116541	0.0866313	0.0900473	0.0820924	0.113065	0.0948903	0.106057	0.121436	0.108338	0.102609	0.0940242	0.12747	0.142013
Uganda	0.0172892	0.0183852	0.0323633	0.0147017	0.022301	0.0188197	0.0474181	0.0266849	0.0347858	0.0467221	0.0295058	0.0154821	0.069446	0.0560515	0.0479433	0.0628213	0.058787	0.10863	0.121901	0.0971887	0.0927286
Ukraine	0.210993	0.268614	0.231838	0.193666	0.351308	0.249024	0.272846	0.300483	0.158394	0.265149	0.313615	0.317309	0.303032	0.296249	0.387218	0.352711	0.310359	0.316643	0.324405	0.375349	0.431116
United Arab Emirates	-0.717007	-0.688432	-0.68222	-0.710699	-0.645816	-0.688182	-0.608193	-0.605453	-0.587968	-0.657805	-0.625248	-0.659051	-0.623331	-0.64351	-0.682814	-0.691802	-0.68511	-0.700731	-0.66657	-0.713948	-0.715718
United Kingdom	-0.555482	-0.565519	-0.577228	-0.557736	-0.596984	-0.566229	-0.540071	-0.526019	-0.515803	-0.505048	-0.53434	-0.52655	-0.500569	-0.495563	-0.44236	-0.448092	-0.402943	-0.398197	-0.405943	-0.408688	-0.403531
United States	-0.0394709	-0.0490655	-0.0428027	-0.0386001	-0.10659	-0.0867724	-0.0875609	-0.103693	-0.0667001	-0.0927447	-0.0911241	-0.0899009	-0.0575325	-0.0212391	-0.00870984	-0.00213508	0.0279623	0.0242234	0.00462706	-0.00428848	-0.00956355
Uruguay	0.150595	0.214546	0.224158	0.151504	0.221448	0.16242	0.289802	0.281343	0.347957	0.288652	0.170142	0.152499	0.244828	0.200565	0.256096	0.264177	0.205308	0.186958	0.112461	0.167835	0.187844
Uzbekistan	0.0351053	-0.0311301	-0.049538	-0.0512867	0.0796626	-0.0649179	-0.0436936	0.0340036	0.095195	0.0762051	0.0162082	0.0133984	-0.0547874	-0.0645195	0.0459756	0.0432617	-0.0815666	-0.0366411	-0.0182531	-0.0659506	-0.0559205
Vanuatu	0.142425	0.157063	0.182951	0.147173	0.129676	0.120666	0.217219	0.170069	0.296745	0.132527	0.357539	0.559229	0.12844	0.300286	0.204115	0.125157	0.329295	0.422866	0.40179	0.376124	0.374007
Venezuela	0.0315248	0.0594135	0.0353549	-0.0010295	0.0177308	0.00979907	-0.047877	0.0268276	0.0236687	-0.0480003	-0.0342618	-0.0767732	-0.164224	-0.217365	-0.238505	-0.192726	-0.112151	-0.253359	-0.296068	-0.360501	-0.308359
Vietnam	0.108663	0.145281	0.15989	0.119119	0.174829	0.150696	0.0740714	0.0431399	0.066758	0.0616897	0.0554232	0.0278597	-0.0753051	-0.0699778	-0.112386	-0.0782705	-0.14332	-0.0995879	-0.161583	-0.266828	-0.304329
Yemen	0.0112916	0.0213265	0.00608393	-0.0196316	0.195924	0.150765	0.040199	0.0174716	-0.0572741	-0.0848143	-0.174148	-0.223131	-0.218939	-0.204576	-0.10971	-0.121068	-0.118543	-0.136446	-0.134739	-0.170391	-0.136846
Zambia	0.0829935	0.0709531	0.0960005	0.0239452	0.0640572	0.0810529	0.164073	0.0859569	0.0897727	0.123605	0.101815	0.0910399	0.112507	0.0967049	0.106973	0.127698	0.175363	0.234771	0.168001	0.270316	0.245076
Zanzibar	0.00485372	-0.000622506	0.0242562	-0.0472078	-0.00848419	-0.0632063	-0.0852247	-0.00778579	-0.121574	-0.0576726	-0.0949371	-0.152379	-0.111553	-0.0763668	-0.12344	-0.11251	-0.10674	-0.119861	-0.172962	-0.173952	-0.103666
Zimbabwe	0.111759	0.144679	0.116319	0.196527	0.128179	0.222794	0.257897	0.152523	0.0659081	0.0892213	0.0425248	0.0102946	0.0375566	0.0109737	-0.0742463	0.0148448	-0.0630249	-0.000457303	-0.0832957	-0.0792293	-0.0407829
Taiwan	-0.389301	-0.376944	-0.365196	-0.467943	-0.333856	-0.647143	-0.311717	-0.333276	-0.272826	-0.304225	-0.298616	-0.282582	-0.577904	-0.290906	-0.261033	-0.275274		-0.275022	-0.265381	-0.239141	-0.498914

## Sheet: land_exports
Country Name	1995	1996	1997	1998	1999	2000	2001	2002	2003	2004	2005	2006	2007	2008	2009	2010	2011	2012	2013	2014	2015
Afghanistan		45058.6	46306.2	51220	51185.7			69128.8	69131.8	43096.2	36004.9	37160.3	29224.6	21999	14051.1	5296.81	13213.5	3447.87	6271.2	6681.91	4459.09
Albania	1053.85	1007.71	967.409	740.445	1457.6	1934.4	4092.77	2700.83	2154.68	2191.35	2310.81	3553.36	3956.42	3900.95	4536.75	4102	3755.51	3319.78	3319.95	3400.92	3482.61
Algeria	32700.5	26326	29187.6	27185.3	26835.8	35935.9	43716	43709.7	31493.1	33356.9	37409.6	39246.8	57176.6	46316	28606.9	45858.1	66263.7	56908.3	33646.9	28522.9	30900.9
Andorra	48.7594	36.8655	29.1495	7.55505	5.70168	5.34865	35.3999	36.2661	21.3248	31.028	23.4656	28.2666	45.9928	42.9521	11.5677	23.0599	17.791	21.6859	18.2884	16.2227	16.7725
Angola	136647	286081	190167	186224	222202	150680	636194	593661	155089	282370	206703	218383	197700	189741	138523	188185	186492	309973	216235	244825	314442
Anguilla	1.65146	1.66448	1.70667	1.8168	1.4137	1.42091	1.6879	1.6013	1.61938		1.55949	1.11691	1.07506	0.988728	1.32644	1.28973	1.4798	0.236966	0.125387	0.0861016	0.0702723
Antigua and Barbuda	34.5642	66.1321	67.0836	20.2013	36.8968	53.9305	123.956	87.6155	83.5511	40.3131	39.1456	21.3764	18.8067	19.5574	43.2679	24.4056	33.8742	24.0787	23.4529	68.2576	16.0868
Argentina	260521	264497	274920	249041	250557	261428	318978	603351	559284	691293	674301	638026	632677	649530	579501	594825	596681	579156	618746	639774	639361
Armenia	801.278	1068.17	898.241	1137.46	912.609	947.52	1161.55	2703.41	2033.12	1625.21	2271.11	1857.87	1182.05	1393.8	648.591	1400.09	1383.82	1498.97	1972.14	2447.95	2810.24
Aruba	0.106874	0.415077	0.173782	0.587016	0.699286	0.0879503	0.174611	0.168239	0.106296	0.116451	0.214201	0.120832	0.13029	0.0519625	0.0612401	0.173945	0.154721	0.0839877	0.0820093	0.0324141	0.0309437
Australia	1.55947e+06	1.61731e+06	1.56693e+06	1.52631e+06	1.54416e+06	1.817e+06	1.94873e+06	1.88855e+06	1.55373e+06	1.72012e+06	1.85515e+06	1.89821e+06	1.97519e+06	2.33687e+06	1.90973e+06	2.52736e+06	2.58512e+06	2.41452e+06	2.62209e+06	2.96237e+06	3.1585e+06
Austria	10199.4	8861.88	10074.2	18744.4	13845.2	21105	31216.4	32206.6	31809.2	30677.6	32833.5	33953.3	37966.3	37830.3	33897.8	39558	41255.4	39565.8	39440.6	39040	39034.2
Azerbaijan	5743.56	4244.77	6744.92	5842.76	6878.53	10240.2	17750.7	9536.12	8158.82	12772.9	17344.9	17670.6	17921.4	16821.3	7988.66	13397.9	13506.5	12162.6	11071.4	9369.42	10102.2
Bahamas	1263.93	744.118	641.154	1002.1	778.349	712.42	1449.11	1998.37	1241.43	536.74	283.146	457.28	489.632	692.666	278.239	179.425	371.724	141.959	211.617	43.7172	42.7274
Bahrain	33.7186	23.1358	22.1324	30.2447	30.8044	29.9794	37.987	80.3514	109.142	71.2917	84.7612	69.5979	84.1871	75.0471	93.3833	77.1499	69.2138	73.6358	80.4073	72.7278	56.6395
Bangladesh	8549.31	9214.8	10075.5	7371.56	11344.7	11331.4	21484.9	21480.2	17143.3	19040.8	20125.2	19218.8	16267	16225.5	15252.4	16892.9	21366.6	24093.6	23319.2	22561.9	23085.8
Barbados	73.8619	50.1621	44.1828	33.1684	50.6565	34.259	69.2401	83.1024	76.1978	61.7755	31.801	36.575	25.0154	24.2128	35.5086	26.3201	25.3008	22.9005	18.9699	16.7053	9.70506
Belarus	49854.5	47532.1	59265	49789.7	62617.5	62617.8	93052.2	86173.8	89594.3	95166.8	101058	93451.9	100541	96437.7	53998.9	82441.3	92620.1	96226.5	82868.1	83389.9	84642.3
Belgium	8954.67	9075.97	9516.93	7529.55	9863.1	12371	19787.3	19665.7	16919.8	18628.8	19418.6	19673.6	19313.8	20243.7	18635.1	19438	20349.9	19447.8	19858.3	20119.7	20397.4
Belize	7093.42	7903.77	5353.06	6968.82	3694.15	4831.83	6214.7	7030.76	6312.81	8046.11	4436.16	5895.47	6194.16	6705.97	5885.69	8943.41	7335.81	9062.57	9225.13	9469.03	9532.88
Benin	9819.57	11169.3	11728.8	8740.09	11519	8646.99	12756.3	13868.5	12421.6	10856.8	10683.4	9351.16	14954.4	15678	13572.5	18909.3	14792.4	21494.6	24987.5	26851	26973.9
Bermuda	1.15827	0.169739	0.159638	1.12052	0.166288	0.0996099	0.134611	0.00865233	0.205107	0.105879		0.00972481	0.0180333	0.0504357	0.0434979			0.0132263	0.00308086	0.00473345	0.00551048
Bhutan	6552.95	6071.96	6079.16	5624.04	9944.74	4805.18	4783.95	4522.44	6011.05	4168.23	6805.73	16974.5	19006.4	18071.9	14528.8	9527.14	7850.87	8103.57	6626.93	3492.13	6153.43
Bolivia	152895	147183	129481	81327.2	119000	119872	132065	159990	191844	216309	236875	295837	278964	309316	225343	303969	283300	328504	346332	328644	264705
Bosnia and Herzegovina	4188.12	6315.67	6818.03	4612.56	7553.46	9564.46	11032	7718.89	15236	13099.2	17719.3	19533.4	16693.1	15398.3	17461.7	12871.3	10217	9956.16	9891.27	10123.1	10335
Botswana	95923.6	139762	145893	87054.7	170065	184196	182799	179055	154910	167733	211401	182611	126982	162697	88800.3	131278	101360	151644	171607	161648	63343.6
Brazil	146774	161864	175900	172306	218338	200862	480602	433681	453869	568942	551974	581135	558740	601053	549501	613973	528913	663702	1.1401e+06	1.25485e+06	1.3453e+06
British Virgin Islands	50.0768	52.7403				36.2615	47.3122	51.2975	52.719	49.7182	25.047	23.7532	20.9619	22.1822	33.4621	24.0994	17.5512	28.1558	28.5621	26.4207	29.8235
Brunei Darussalam	1064.92	856.548	724.86	632.052	783.921	579.905	803.372	920.02	401.629	310.047	247.982	241.786	420.238	378.827	441.828	496.578	991.41	1057.81	719.231	1367.5	1068.11
Bulgaria	27331.3	33549.3	31266.3	26436.4	23377.8	21302.4	39502.8	32877.9	34525.1	40424.3	37249.8	34990.7	37221.7	40558.8	32393.2	43320.9	46037.8	45860.5	48674.7	47736.1	49024
Burkina Faso	10352.4	7693.57	8227.5	12678.5	7863.64	7318.17	29937.5	21208.6	12415	16975.2	11536.6	11765	12682.1	15016.4	16280.5	23372.3	32725.5	34447.3	38269.2	44250.5	40917.9
Burundi	1473.18	626.234	1262.07	948.086	956.238	936.505	982.013	1833.19	926.896	1863.4	801.17	1328.9	785.49	1397.97	779.47	1577.65	1275.18	1276.61	1418.91	1462.12	1586.53
Cabo Verde	107.498	98.5433	137.873	139.713	140.526	129.106	280.633	202.669	145.291	97.571	65.1769	69.3508	93.9394	87.4957	59.9053	64.7916	69.3708	79.2333	139.295	124.808	141.932
Cambodia	26467.6	21834.7	33328.4	26367	43424.5	43763.8	49582.6	52298.2	51511.6	58559.2	54740.5	58740.9	63210.7	60808.9	35009.6	36428.3	29974.1	36822.6	51181.2	49071.2	50484.2
Cameroon	56854.9	70005	83695	48146.9	160420	157897	169397	159227	149240	155167	162759	166697	163535	161531	148417	128409	107215	120510	134775	130470	133591
Canada	746978	764940	797515	714843	848404	728940	1.00111e+06	870966	726095	827418	832802	783205	878720	870307	749386	880776	865811	872779	940972	987995	1.01509e+06
Cayman Islands	18.8944	78.987	44.4135	72.2241	32.551	30.8799	47.5857	37.6154	43.9643	10.6563	12.3214		17.7609	12.2981	38.6759	10.7727	8.34892	7.24277	6.7907	8.01217	7.50796
Central African Republic	17768.4	19543	25430.5	21895.4	24273.3	61929.1	59328.8	59020.3	69387.6	61941.1	63622.6	67487.3	138328	115548	157495	99419.9	78336.4	102400	141354	138179	138702
Chad										116296	98535.1	92309.4	115205	113414	125379	118230	152977	106861	70235.3	92040.1	112308
Chile	66038.6	60307.7	56737.3	39041.3	64763.7	44469.4	107345	108733	109487	111217	111051	105522	109058	111505	114561	82238	78747	74804.9	75424	83675.3	81868.5
China	487872	496526	646073	1.26183e+06	694917	1.23875e+06	750680	753508	959996	973332	1.13254e+06	1.29623e+06	1.44125e+06	1.25694e+06	1.02268e+06	1.0218e+06	976211	1.04363e+06	1.02214e+06	1.07079e+06	1.1018e+06
Hong Kong	101.331	22.2123	19.8549	98.8776	51.3259	39.7846	36.5415	54.3055	107.226	69.796	86.2749	104.482	122.832	62.1213	97.5929	78.5466	81.2351	95.9234	78.9019	67.3967	69.1372
Macao	7.83063	4.88322	4.98661	8.20287	5.36223	5.52176	6.85494	7.30373	6.22176	7.61218	0.773378	0.422302	0.0211153	0.380688	6.5728	6.64182	0.435855	0.48269	0.359496	0.631841	1.12174
Colombia	69510.4	64787.2	68343.3	60814.7	73791	70257.9	98941.3	94790.3	90461.5	127793	121832	132890	130086	156895	115832	100088	91405.2	166727	161493	133951	133013
Comoros	205.732	206.592	210.414	135.312	156.828	196.751		258.467	256.832	224.652	151.661	186.12	156.714	155.334	145.197	210.462	164.041	142.116
Congo Republic	35475	42810.5	52363.6	39393.2	82778.4	83200.2	87750.2	87920.2	80896.2	89938.4	96225.1	99438.6	102456	103849	102108	106999	65198.2	105001	72234.3	69182.5	73775.9
Cook Islands	57.922	61.6266	64.374	60.7673	75.0814	86.7709	97.6153		77.6678									95.3033		88.9705	92.7789
Costa Rica	12614.4	22939.9	24505.5	13944.9	25288.3	23873.4	23842.1	23124.6	22375.4	26297.3	27816.7	28265.9	29370.7	28140.6	29748.1	26820.5	24806.4	26203.6	24769.2	24361.8	24784.2
Croatia	4916.13	5541.22	2711.24	4857.11	7883.76	4939.56	7303.55	7309.65	20784	11951.4	11764.9	12150	15549.9	12802.4	16371.3	8561.16	7595.87	9001.23	6568.63	7173.54	11100
Cuba	9349.77	9679.22	9303.17	10740.9	9641.48	6474.99	17501.3	14289.3	11514.4	9456.25	10164.9	7400.54	8276.34	7012.02	9893.9	9575.68	8564.09	8747.31	9589.11	11307.8	10096.1
Curacao											48.9319	51.921	47.4482	46.4878	62.7601	37.0874	101.982	116.51	42.3536	29.6885	30.29
Cyprus	596.865	654.386	713.502	694.943	709.158	614.018	2514.5	2142.06	2455.33	2612.63	2585.84	2114.47	2055.62	1951.42	2049.74	2675.6	2819.33	2779.5	3289.61	3520.15	3478.68
Czech Republic	15572.7	10899	12142.4	11462.9	14180	18576.8	23863.6	22572.1	24112	26256.8	31251.2	31188.2	32747.5	31892.3	32285.6	35146.3	34852.8	36830.3	37214.1	37713.6	38679.4
Cote d'Ivoire	65272.5	73451.6	73931	67749.1	84676.3	68704.7	81099.1	84299.4	74948	79781.9	81927.3	87307.8	92081.3	96063.8	96668.6	96301.4	94857.7	92220.7	86637.5	86197.6	86298.3
North Korea	1895.97	2233.95	3029.72	1600.68	1892.78	857.671	953.428	2670.36		2355.51	1814.79	1931.06	3298.21	4727.28	1717.17	2658.41	1836.02	2047.39	2442.93	5880.49	6347.37
DR Congo	231734	302470	350848	208447	504461	400101	669427	638385	624203	664752	645765	618227	735690	708895	604400	788528	659602	693503	651128	532841	524964
Denmark	7146.59	7361.7	6134.17	5564.16	5911.2	6589.71	22070.7	21504.9	21191.2	20399.1	21487.7	20597.8	20495.3	21778.4	19480.6	23000.3	24032.9	23887	24275.9	24477.4	24276.4
Djibouti	551.442	510.356	583.683	601.92	746.225	1098.65	811.635	757.635	473.225	450.523	579.444	1438.67	2129.63	2162.93		2111.39	2242.38	1622.47	2121	451.91	450.6
Dominica	173.598	214.621	215.855	223.693		90.1995	496.315	236.308	261.398	280.299	281.363	243.226	180.171	91.0125	145.081	85.7446	116.972	91.9189	141.734	122.249	75.213
Dominican Republic	9996.66	9353.36	9335.09	10254.9	8556.39	9166.94	14024.8	13276.1	11689.4	11363.7	8820.45	8860.51	8470.48	7296.76	6108.31	5900.33	7751.53	6315.27	6987.69	7424.27	7892.27
Ecuador	32780.6	50878.4	43983.1	30506.2	69046.5	59487.4	61939	53319.3	53686.8	72829.7	71056.6	77702.2	81310.8	100192	45973	77665.3	91939	97360.6	99436.8	101277	104169
Egypt	5259.78	4925.01	5014.2	2921.65	4539.93	3796.91	8442.59	8286.06	8587.76	12774.8	13689.2	13176.7	13523.2	13769.4	10308.4	10358.4	9717.99	8486.18	8916.84	7647.08	8446.48
El Salvador	4397.77	4167.55	4918.65	4088.62	4860.82	4944.1	5854.22	5628.84	4933.15	5546.25	5369.65	5035.32	5175.09	5450.06	4775.29	6301.36	8052.25	6951.35	7916.87	7141.78	7452.56
Equatorial Guinea	6537.65	19325.6	20814.6	18637.5	20736.9	15956.3	20834.2	20975.2	20619.5	20638.1	20781.1	20317.3	21419.4	21071	20151.1	14760.5		13208.9	20499.2	16893.5	22390.1
Eritrea	4440.66	6213.76	6748.18	3678.02	3144.24	3021.56	3967.93	4057.67	2060.33	2221.17	2092.15	2096.47	2089.47	4446.28	7097.71	3594.88	3672.98	6011.01	4740.67	4691.93	3325.77
Estonia	14762	14292.5	13035.9	16596.6	14097	16801.5	26475.4	26610.4	26793.6	25748.9	26474.6	25440.2	27161.8	28817.8	24742.7	30867.1	33107.4	31675.8	33222.7	33056.9	33358.2
Ethiopia	27980	23108.4	30861.4	31409.2	27574.4	35468.3	83485.6	75797.4	72847	76721.8	68834	66579.8	62921.3	46818.7	44560.2	70768.7	91458.8	67486	67267.3	67222.9	61039.7
Fiji	4684.45	6079.99	5440.23	7740.08	5342.14	5278.54	4324.38	6825.6	8161.04	8830.29	9172.13	4344.73	5568.14	7248.98	9330.21	5844.74	3038.3	5193.65	5325.28	4999.39	4650.84
Finland	83235.9	91575.4	90733.5	46416.6	87365	34857.6	118825	118495	114780	112856	101181	95602.7	102311	89876.2	76279.8	95188.9	95104.8	96073.4	100793	99916.3	100928
Netherlands Antilles	127.577	186.828	200.274	133.116	107.97	192.44	79.2732	67.1268	56.5751	36.2311	36.0239	46.9173	27.7586	27.8164	25.5885	2.5298	10.2083	10.2948
France	76981.5	80462.5	92444.9	112762	78765.4	105023	169665	154714	158010	160359	158529	166837	167054	182569	158641	177588	191499	181059	194217	184778	192605
French Polynesia	36.241	33.7697	35.7124	42.7575	36.5718	43.3593	53.8127	46.7422	42.9583	27.0543	30.4726	27.6614	24.7713	24.3383	18.3544	23.1695	30.6202	30.0057	27.0493	24.4268	28.1823
Gabon	47995.9	47645.8	65892.2	34591.2	99280.8	83249.4	118391	109389	123481	111680	120559	124454	127799	120357	141867	120399	102599	115528	81106.6	77305.3	82351.8
Gambia									496.099	660.395	280.271	109.475			489.165	784.841	1274.3	1624.17	1666.62	1289.67	1671.96
Georgia	5586.03	7034.31	8650.76	5316.66	12230	12760.8	18007.2	18359.5	22861.3	20139	18369.2	14026.4	12694.4	13803.2	10621.7	19366.7	16249.5	17755.4	13549.6	15697	15885.5
Germany	34131.8	34837	37710.2	56220.7	43227.7	63618.9	99753	101554	100039	101994	113108	118928	124446	120752	113977	123142	122207	124259	128070	129775	132569
Ghana	20523.4	21111.7	21492.3	27293.4	27454.7	36990.4	63754	61574.6	66886.3	51698.8	42014.2	50700.7	55037.6	54221.2	57093.9	58782.5	72655.1	79051.5	72736.2	76997.7	74688.6
Greece	7478.56	5274.5	6473.53	7498.91	9680.63	7652.67	22636.2	18254.7	18345.4	14400	22190.2	22243.6	20982.9	20955.1	15090.8	27955.2	33291.2	37953.5	40247.4	44224.7	41214.6
Greenland	69.9096	144.927	97.8898	72.7233	95.7573	21.1073	163.726	123.607	176.007	157.55	169.615	81.524	129.325	73.002	101.655	64.3848	17.9536	17.484	19.1488	27.8621	28.0059
Grenada	74.8808	101.646	95.1153	81.0585	123.656	99.801	117.463	119.267	262.066	96.7427	25.7373	22.2615	25.4112	14.2094	30.3966	12.9614	14.2553	14.3075	14.3837	27.5048	23.5994
Guatemala	23511.9	38418.6	37704.3	24712	38909	39188	46334.5	38140.6	36868.1	43233.9	40970.7	40534.8	36314.3	33340.2	31907.2	37638.6	37309	32639.9	28975.3	29058.2	28776.5
Guinea	8984.92	7648.85	8523.63	9542.12	13062.2	9001.22	18580.6	11420.2	9841.65	8450.75	12590.4	16683.1	15336.9	21584.8	12317.5	17542.9	13388.4	14590.6	13990.6	16307.9	16355.8
Guinea-Bissau	1145.98	993.721	1430.38	989.264	1679.31	2719.83	3068.04	2034.61	1946.18	2265.63	2283.86	1813.16	2514.57	2502.06	2486.83	3257.49	3942.26	2881.03	3474.94	4121.99	5305.96
Guyana	12617.2	13502.4	12539.7	13683	12394.7	10916.9	15588.2	27964.9	14636.1	14389.6	9296.07	10310.3	8704.86	8830.7	11235	6769.6	6528.44	7580.74	30380.1	30796.6	30445.6
Haiti	1714.59	2604.92	2477.67	1915.82	3076.3	3360.7	3123.52	3363.74	4064.74	2722.28	3014.11	2861.23	2214.98
Honduras	33814.7	51580.1	52408.4	35707.5	51725.7	51996.9	53562.7	41894.4	52114.7	59617.8	59842.9	59347.1	56541.6	53205.1	43818.6	51614.2	50437.5	52720.9	57284.6	55414	55977
Hungary	17519.7	16891.9	16638.8	18523.1	18229.3	21921.3	36914.1	36893.4	34955.3	32448.1	35964	40827.2	46264.2	48316.2	46260.8	47021.7	46852.4	48483.4	47219.9	46967.8	48660.9
Iceland	10439.5	13214.5	13577	9383.69	12920.1	10628.6	20999.4	20378.5	20038.1	20024.8	16188.3	18234.1	19798.6	20155.6	23871.5	20634	21558.8	21735.1	18245.4	17101.9	17698.7
India	79029.4	85334.6	106051	224103	112732	124876	197582	211583	198234	268174	226825	248303	247730	286335	215397	263899	303454	339933	365276	306039	288090
Indonesia	389278	424995	398195	502630	616249	597721	713359	590126	411366	512324	558973	438843	428026	406987	264265	311399	349167	253992	291472	294605	290724
Iran	108529	118625	98323.6	58380.1	103865	87828.4	125653	129400	126684	128736	152494	158496	159628	137424	97432.6	162398	140232	119904	146224	114021	142731
Iraq	14128.2	20163.3	45446.9	32157.1	45584.8	32920.5	39980.4	47092.1	46116.1	39592.3	27984.4	22025	19961.2	23840.9	8372.27	13336.5	18006.3	19573.6	18745.5	14574.6	15920.2
Ireland	15563.7	15898.5	17740.2	18568.1	17386.1	22182.2	48584.6	52442.9	43233.5	43497.4	50067.9	45547.7	45853.9	49050.5	42191.1	51938.9	50110.2	48860.3	50387.2	52361.5	52799.2
Israel	2204.35	2062.33	2043.6	1588.95	2372.42	2064.94	3845.47	3657.95	3826.16	3931.57	3454.13	3195.13	4437.4	3766.39	4747.02	5787.38	6126.73	6125.07	5449.79	5198.15	4868.46
Italy	46144.2	40501	38858.4	42850.5	33920.8	32840.5	53905.6	51409.9	47503.1	46720	49057	49700.7	53920.6	54521.2	49791.1	57938.7	62246.8	65457.3	66665.2	68890.4	70547.1
Jamaica	3454.53	2382.85	2306.85	2818.74	2706.81	2685.44	3097.23	2974.02	2821.75	2186.78	1700.91	2300.35	1600.46	1470.35	1609.88	1524.62	1056.3	1589.22	1557.09	1398.52	1401.31
Japan	6616.42	6989.6	7474.8	7924.72	7539.26	7258.21	8854.19	13743.2	7825.2	8003.26	8501.31	10424.9	11184.1	12255.6	11401.4	13646.6	16108.8	12852.4	16360.8	19017.6	20558
Jordan	2385.04	3364.51	3285.76	2105	3138.65	2922.67	2588.83	2728.08	2683.18	2064.2	2341.58	2310.93	1756.44	2853.14	2570.83	2282.48	3007.44	3216.25	4342.33	3935.29	4011.3
Kazakhstan	566116	522658	513970	499484	504745	652550	690633	707324	767297	726943	681263	696814	686061	774447	444855	630439	686457	655555	536211	597654	387126
Kenya	42237.4	44126.1	42476.7	37468.6	40214.3	37423.8	51913.2	57822.1	57718.5	58634.6	53219	54316.4	51239.9	51760.4	49970.8	51574.9	48301.1	46830.8	45117.4	39544	40492.8
Kiribati	12.989	26.0833	36.0244	45.6458	17.9674	14.9598		19.3719	279.933	27.4437		43.3675	208.054	206.589	2.50218	25.3957	5.30369	75.1584	228.402	219.861	97.1643
Kosovo	555.633	559.339	543.472	516.116	526.976	481.884	954.393	944.768	908.345	1169.24	954.249	1279.42	841.851	1200.97	1169.94	1819.87	825.533	1636.7	1340.81	1584.58	719.762
Kuwait	135.049	110.119	167.966	81.6336	119.846	147.344	331.529	272.479	202.029	207.973	392.364	407.338	410.227	405.866	319.157	395.824	389.918	393.874	436.295	434.721	409.896
Kyrgyz Republic	15819.9	16818.4	25788.2	20902.6	25334.2	27044.2	30735.3	30206.4	31997.7	37130.7	30860.5	27574.8	32292.6	32441.3	38950.8	37228.8	35696.8	30829.4	28853.5	11469.5	9527.57
Laos	23938.9	27989.7	31356.3	28862.3	37805	40954.9	46268.1	49945.9	43295.2	52351.8	60960.8	59090.5	68849.6	54517.9	27048.5	37503.7	14193.6	32673.3	48867.8	51052.7	51751
Latvia	11972.1	12612.5	10572	9638.68	8439.41	11294.5	30922.7	30477.3	31201.5	30590.4	32988.8	31446	34920.9	36703.1	29259.3	43036.8	45810.1	46246.7	48258.9	49617.1	50989.3
Lebanon	1008.3	1069.24	928.637	904.699	822.801	841.78	1331.34	1585.35	1270.15	2152.27	1868.99	2032.23	2213.26	2195.52	2129.32	1969.95	2278.21	1931.46	2014.47	2616.4	2697.66
Lesotho	1540.35	2723.73	3352.38	4266.11	2822.9	3378.9	5411.62	6001.45	6424.75	6282.13	5314.29	5214.13	4973.44	7109.59	6704.42	6824.81	7940.71	6305.31	6281.61	6711.93	8223.07
Liberia	17615.4	14327.4	13296.5	14281	37125.4	32058.9	34639.6	34680.3	46280.3	6733.94	6406.06	5345.96	7118.49	5724.52	4089.34	5417.52	12405.1	17661.1	17415.9	20341.9	20745.6
Libya	10936.7	6272.81	6977.24	6157.84	5083.52	5513.01	12019.3	12124.4	23658.7	13465.1	13155.7	33607.5	17978.7	19237.3	8116.53	9312.94	9367.71	18733.7	11388.8	11586.3	9722.87
Liechtenstein				8.73814	21.9745				28.5113
Lithuania	9660.4	5815.19	3774.73	7211.5	1824.63	9744.79	22684.8	22506.9	23637.1	21569.4	26395.6	26831.4	28671.8	32536	20053.2	32589	35675.8	36921.8	37136	36884.4	36542.5
Luxembourg	806.353	860.964	888.768	1011.99	1015.03		1503.22	1655.08	1686.47	1679.29	1808.82	1853.74	1858.24	1862.43	1944.35	1902.88	1870.83	1865.28	1870.09	1874.51	1887.02
Madagascar	46379.6	36997.8	46026.2	18212.9	102564	128275	128891	109785	58239.7	91529.6	100846	135419	99468.7	131019	60547.9	87002.5	72532.3	83211.6	82378.6	88436	91870.7
Malawi	11705	4400.07	6411.59	11579.1	9304.83	7654.98	13807.5	9643.41	19664.4	13139.3	11222.3	12757.2	19298.9	15356.6	14198.1	14115.7	26345.6	22889	29541.9	25579.6	25322.1
Malaysia	137783	159375	165018	196659	194046	180641	209276	218734	242422	230771	235799	207126	229158	224697	215435	195084	193469	187518	116401	112051	116002
Maldives							62.2227	91.7055	36.0248	34.0628	16.8429	6.92916	6.80741	6.51286	7.23333	7.63571	20.7178	12.7856	9.24257	9.23012	10.0898
Mali	43287.1	39299.8	52107	45007.4	49590.2	57953.3	223625	232457	224759	180981	138989	188178	206285	164183	53964	169521	169632	185930	70504.6	72623.2	69890.5
Malta	60.7798	23.8849	20.7258	31.5937	22.2916	22.5464	46.1876	57.9599	57.7971	59.7678	62.6829	53.9471	59.8577	64.1916	65.057	59.444	68.8436	60.0834	72.4972	61.4212	61.7443
Marshall Islands	6.62723	5.94059	6.11357		3.62795	3.32125	7.2338	3.63918	4.20453	2.58737	2.8822	2.13125	2.26592	2.40485	2.42581	2.1759	0.82645	1.74828	1.39513	0.965456	1.2109
Mauritania	28406.7	33005.2	29500.4	39520.6	27828.7	28877	33270.2	33201.1	19554.7	22711.5	22679.2	36843.7	19180.8	12781.5	20798.4	29945.1	15479.4	29182.8	23026.7	32979.3	35310.5
Mauritius	336.229	339.937	319.14	363.454	327.916	298.768	517.97	452.894	350.055	309.57	286.761	288.527	278.221	278.867	271.696	257.52	256.039	242.15	262.746	275.188	275.674
Mexico	197075	207488	134314	107602	140605	138364	217349	151376	203528	172556	173810	211873	201850	181955	195474	230535	254857	277098	387203	452860	500285
Micronesia, Fed. Sts.	37.4305		34.8507	37.3536	35.6558	38.1182	45.8466	47.0002	41.7196	31.1056	35.8001	31.7518	44.8732	47.6615	43.1793	46.4487	79.6237	226.432	203.528	30.0943	29.9447
Monaco																				164.902	72.2648
Mongolia	158165	136059	216062	166670	225892	223776	310702	306871	361445	306852	258043	381376	359346	258468	259748	422270	284694	216546	194833	289385	254382
Montenegro	1230.38	2469.75	2527.36	1246.75	1827.53	1727.52	3871.69	4897.22	3187.47	5565.16	5812.01	5018.87	4813.65	3188.15	2619.95	1941.79	1515.91	1409.29	1656.27	1614.84	1649.58
Montserrat	25.7575	43.9137		13.408	15.0156	17.5867	16.1063	15.5019	12.8534	8.27812	2.65136	6.66198	14.4553	2.559	2.49134	9.37313	3.11319	5.53364	1.98348	5.86485	2.29023
Morocco	32651.4	30667.3	32079.3	28542.6	33964	27436.9	50963.3	52516.8	49935.7	46477.1	47750.5	51112.2	52032.6	52394.5	45495.3	49560.1	51372.4	49408.7	46319	51210.8	48068.9
Mozambique	40387.9	57880	49036.1	40995.9	118146	46078.5	160294	156267	151111	210710	107800	96590.3	194006	139027	114946	206777	132631	188694	203973	203476	201089
Myanmar	48701.1	53259.5	55554.2	47021.2	89066.3	110556	118070	116615	83350.6	135570	147987	166036	185548	160903			74960.9	87731	143680	134438	137961
Namibia	97828.7	117746	112426	89223.3	113780	111155	213174	129966	136357	113036	138885	116505	121430	157103	127055	125608	134264	136356	162696	163469	144975
Nauru		0.804137	1.10129	1.43546	1.00042		0.488422		0.553495			0.74353	1.16891	0.628708	1.02111	0.202204	0.72003	0.107756	0.114566	0.796298	0.0546874
Nepal	18875.1	15779.3	19058	17754.5	15316.5	15374.8	29997.8	27470.8	14558.6	21940.1	19503.8	18128.6	43415.7	22774.5	21458	16554.5	13873.2	15044.1	17464.5	16370	17813.1
Netherlands	9202.97	9367.46	9941.13	11261.5	12592.8	13003.6	24262.8	24129.2	23854.4	23913.9	20387.3	24051.7	24479.9	25028.3	23232.5	24706.7	25107.8	24994.1	24747.6	24872.5	24947.2
New Caledonia			1154.73	1645.39	1355.1	1743.42	1279.22	1408.25	3402.93	1220.87	1513.79	1491.21	421.862	459.919	327.159	435.916	207.653	222.903	673.248	1233.09	1228.44
New Zealand	81575.4	99120	98310.8	82591.7	101773	100983	126864	130934	128000	134343	133155	135285	141180	139512	131132	120769	112619	116781	102839	103307	110337
Nicaragua	31018.7	30977.6	24060.2	22644.7	27822.9	34121.3	40541.2	37040.7	40317.7	49729.6	42305.1	36121.6	32639.1	33114.3	30281.2	50493.4	46182.7	53883	61801	61693.1	61054.5
Niger	91979.1	92793.8	88001.3	69736.3	70647.3	85845.2	106996	98265.7	103371	102755	99353.4	84607.4	75303.8	104161	105038	107083	103924	96980.6	110115	94977.2	85220.3
Nigeria	85492.1	74326.4	104691	58885.1	84426	151643	204082	154569	130275	137799	132568	191722	128102	158587	116288	150504	202583	309362	161609	181749	188701
Norway	42000.5	45276.2	47489.7	37926.6	48505	46255	68448.8	56316.3	62482.5	65079.7	63533.9	67313.7	73790.5	81150.8	70484	72592.9	90778.7	101899	121648	121004	124854
Oman	1675.63	1585.35	1762.13	1745.05	2367.02	6668.46	7287.38	7955.06	7606.14	8512.49	8781.24	8716.05	8418.83	8033.35	8391.36	9691.85	8984.31	8138.1	8218.74	9199.81	9284.01
Pakistan	49909.2	56897.3	53954.7	54367.8	50476.8	59876.4	103838	145031	107570	75035.9	69419.7	61398	81845	63778.6	49196.9	66034.4	126015	85019	102127	65842.1	68075.3
Palau	21.082			14.4749		15.259	64.0038	72.3376	77.461	42.5595	103.757	111.591	107.657	96.3618	97.9835	123.256	108.553	292.139	263.123	297.322	294.028
Panama	21089.3	18999.7	21281.8	18836.3	17239.8	17164.7	35115.3	31341.4	37901.1	29600.8	36301.1	36322	35957.5	33576.9	33526.9	31362.4	28069.3	31622.8	23284.3	22473	22661.5
Papua New Guinea	99935.6	114342	118688	78129.1	130720	133152	148671	146798	212746	190451	204104	211486	231241	229339	225487	137615	78497.6	111859	128805	139938	159094
Paraguay	112155	153414	146528	112922	143301	121006	147582	182745	170736	175673	191616	199417	210583	186775	182161	182737	176436	178108	193527	173537	172432
Peru	48515.1	53867.8	59899	48682	73861.6	74989.9	116937	124027	101555	142911	164209	184627	162672	160098	128882	159009	149150	146525	139295	137107	143065
Philippines	37681.3	37488.6	44634	37740.3	47692.5	45290.4	60822.5	64043.9	42352.2	54263.4	52488.7	53639.2	48205.3	38277.7	31189.1	41034.5	39598.7	37634.1	37541.5	41728.9	41857.2
Poland	26476.9	20062.1	16934.8	9589.38	17846.1	18073	57972.9	68645	67215.1	68308	66871	70250.3	76322.6	70934.7	75073.2	83213.5	85364.6	95474.5	107355	110015	113983
Portugal	14941	16285	16037.7	9331.89	14551.2	10566.9	20889.6	21853.5	23589.1	23231.2	20674.2	24448.5	24259.2	24157.3	21687.7	23548.5	29223	30817.4	31652.1	31979.9	33213.9
Puerto Rico	2970.3	3303.99	3645.02	3011.48	3297.26	3163.97	3317.19	2931.38	2724.69	3018.51	3077.77	3237.51			2813.74			2255.99	1572.6	1560.83	1308.27
Qatar	131.56	101.095	118.28	142.213	183.706	243.038	366.089	281.042	277.215	192.389	201.044	211.246	215.833	218.208	309.327	228.184	217.699	229.156	267.293	230.856	216.266
South Korea	7619.79	7165.85	8672.04	17486	12181.9	8558.85	9289.77	7379.44	8721.45	8464.42	7591.91	7358.81	8580.51	9374.64	13013.5	11562.9	11443.8	12932.8	10939.1	12531.6	12229.7
Moldova	13368.6	12423.2	11966.6	10916.1	13019.9	10891.1	16010.8	19046.5	18913.5	17332.1	17820.7	15396.7	15595.3	13158.5	13800.3	16747.1	15779	16423.6	17533.2	18192.1	18555.8
Romania	27854.4	22126.8	22742.3	18183.8	26550.5	41706.5	67494.7	71740	71867.5	68562.4	59997.8	58684.7	58834.8	57523.3	60676.8	52458.1	57633.5	63834.3	75259.8	80933.7	85400
Russia	468075	417482	374592	1.30763e+06	851150	2.80303e+06	3.03604e+06	3.40606e+06	2.53072e+06	3.0345e+06	3.14517e+06	3.1781e+06	3.39583e+06	3.24316e+06		2.6003e+06	2.8257e+06	2.28888e+06	2.54322e+06	2.81016e+06	3.41985e+06
Rwanda	778.995	871.862	943.361	649.73	966.753	919.328	1630.43	1372.04	1656.21	1631.74	1543.34	1829.52	3515.7	3507.19	2173.95	3723.86	4075.34	4871.48	3681.95	3666.83	3063.29
St. Kitts and Nevis	47.7913	46.0993	40.0216	45.3465	38.54	27.6966	88.4133	60.2986	48.6844	37.5449	29.8044	18.5638	13.1656	4.25046	13.4931	5.04332		10.0214	45.0125	18.145	10.9176
St. Lucia	283.099	261.506	213.445	144.03	219.444	183.579	259.219	332.737	154.624	396.18	133.356	121.715	70.1601	120.337	129.822	129.442	107.443	51.9055	45.6579	67.2672	69.3501
Samoa	185.356	200.938	267.337	210.365	216.724	268.641	188.849	234.826	127.086	188.788	186.285	79.1734			71.7715	81.5098	129.833	109.762	146.155	152.795	140.034
San Marino									32.0605	33.6997	35.1321	38.1184	33.9657	30.2498	33.9838	22.2763	20.5688	31.4037	29.8135	30.5382	33.3626
Sao Tome and Principe	103.546	120.992	144.644	177.181	206.262	188.202	297.852	265.88	254.12	157.97	160.316	135.877	164.909	132.635		234.56	200.693	221.924	200.488	194.793	194.794
Saudi Arabia	25246.1	26446.2	27299.8	9596.19	29375.2	30536.5	43466.1	55110	52451.3	52541.2	58172.7	56671.8	58878.5	56243	34866.3	47529.6	38305.2	37625.8	54037.8	51893.4	56142.5
Senegal	16228.6	15413.4	15138.7	14775.8	15933.1	14690.8	20978.2	20447.4	14911.3	15381.6	14006.3	12650.7	12100.1	12696.2	14122.4	14723.2	18053.6	18582.7	24248.9	20411.7	19868.1
Serbia	3059.51	5895.94	6247.28	5502.4	3221.75	3804.46	18214	20635	17252.2	19353.6	21743.8	20842.4	20764	18232.6	16586.5	22300.6	23258.1	23067.2	24817.2	27243.9	28254.9
Seychelles	42.8574	72.1511	76.0187	75.5063	59.9103	58.9531	134.335	92.9062	80.1522	81.5686	56.8115	66.118	69.6611	66.9251	51.6416	68.5446	57.1091	48.6689	68.8192	46.8488	44.6717
Sierra Leone	5250.35	3906.63	3149.3	3647.8	3506.77	3438.81	3207.61	3455.03	5028.31	7027.54	5412.17	5452.85	6182.31	5387.69	6564.76	11258.2	10776	14078.4	19514.1	20494.9	20045.2
Singapore	4.38103	0.350291	3.21392	1.85234	0.507094	0.771106	0.78265	0.334892	7.91938	2.25065	3.04861	2.7599	3.6614	4.00426	6.36297	1.05303	1.14878	0.386272	2.60403	1.45	2.09686
Sint Maarten											10.7156	10.51	10.1769	7.227	6.41805	9.37522	5.2196	7.67141	9.17249	7.76284	9.5001
Slovakia	14459.1	5073.22	4499.7	5593.48	3902.01	7373.15	14831.8	15181.4	9655.24	18602.5	21763.7	23233.7	21306.4	22342	25174.3	27230.9	28678.4	30531.7	32077.9	32451	33932.3
Slovenia	2730.91	2492.32	3481.07	2520.32	3300.92	1737.5	6063.8	6411.36	6033.44	6282.16	6890.32	7295.43	7877.14	7801.14	5960.7	6918.34	8059.16	8315.45	9086.82	9879.87	10110
Solomon Islands	6136.06	6368.15	6287.93	6546.79	6678.23	6530.56	7099.81	7057.21	17160.6	14301.3	6252.57	15186.5	10470	18114.5	18531.9	12054.7	7602.7	12747.2	12468.4	12008.8	11539.5
Somalia	1229.1	1224.75	1195.49	697.019	8165.4	15298.6	2080.47	3442.88	1792.06	9615.23	14567.2	11098.2	8420.42	8311.04	13216.2	17126.2	16315.8	16437.7	25167.4	10042.5	9046.96
South Africa	93266.9	92752	95111.2	102234	86668.5	79953.9	164883	174993	150236	160815	167171	169291	218503	288161	235450	256422	307391	271474	304627	318202	342512
South Sudan
Spain	69753.9	73929.7	93201.8	85170.8	100126	101668	135350	137497	141888	133570	138969	140715	151269	146845	130008	155348	166688	178942	190499	199567	199323
Sri Lanka	13598.1	16738.9	18056.9	14196.8	19039.6	19048.9	19065	22838.9	24325.5	24607.9	23651.8	24421.9	23005.1	21674.6	17729.3	18743.2	17104.1	18531.2	13814.5	13960.8	13707.4
St. Vincent and the Grenadines	88.5757	87.5388	68.6724	51.0231	91.4822	127.735	110.146	213.718	225.771	155.431	87.4563	88.2247	71.7579	47.4256	58.9182	34.5651	31.7699	22.8878	13.2577	12.8751	10.66
Palestine	36.6465	25.26	26.4824	35.4897	25.8359	98.8477	72.9886	62.0173	50.8543	48.4253	42.8189	37.5295	56.4354	64.5685	73.7744	71.2034	79.1261	87.2678	122.225	115.686	139.979
Sudan	49890.9	58216.6	54077.9	41544.7	229456	269198	129987	274129	232399	301025	282370	275821	305975	337737	209116	315138	303386
Suriname	10338.5	16970.5	19038.4	17196.5	16600.2	10574.5	17231.9	15565.6	9263.84	11048.3	16415.9	20762.8	19846.7	20622.1	22550.4	21704.7	19125.3	21512.8	17246.9	17443.4	16999.4
Swaziland		4445.78	4638.57	4015.65	4482.96	4370.17	4894.32	5264.82	5464.87	5002.57	4154.13	3386.48	3048.51	3317.59	3633.5	2865.94	2687.4	3414.49	3766.04	4502.05	4298.81
Sweden	73392.6	71061.8	82939.3	45722.9	83906.3	50402.3	166417	179542	175157	179751	191804	181019	172978	172143	173104	162350	153615	153657	143948	149229	151446
Switzerland	9438.34	9202.84	8986.05	7595.08	10231.7	10140.8	15866.7	14931.4	14777.2	14911.1	15252.5	15885.8	16607.3	16878.9	15362.8	16762.3	17018.5	16894.3	18873.1	17436.2	17765.7
Syria	21038.5	27206.5	27584.7	24138.3	20375.8	22299.7	29688	42465.1	40671.6	48649.5	38557.7	38496.1	40423.2	36238.3	28925.6	31282.1	26623.3	30019.1	32295.9	30031.5	31274.4
Macedonia	2945.74	2518.94	3282.79	3385.34	3659.14	3389.9	6473.93	5626.44	6268.81	6194.72	5971.29	6568.22	7723.15	6151.82	4737.72	4859.4	5770.31	5611.17	4846.59	5337.45	5515.98
Tajikistan		14826.2	16369.8	10166.6	14096.7	17974.3	18665.2	15719.6	15822.4	12620.6	11205.4	14799	12071	9778.81	1444.69	5709.93	2795.45	4655.55		2164.33	3299.96
Thailand	108200	106374	119569	120330	116130	118036	140300	137639	135081	149639	143643	144309	139939	144295	142124	154350	147838	160892	168852	172641	179435
Timor-Leste	621.795	345.857	314.558	265.289	645.637	515.361		666.159	1302.22	3494.93	3137.11	4879.52	4756.48	3799.22	4438.15	4661.74	3426.66	5081.77	4933.08	4643.34	4887.74
Togo	7226.76	8157.63	7545.19	8997.54	8365.53	7974.5	12279		12049.2	10623.3	10083.5	9000.59	9658.64	9624.13	9425.96	11128.5	10884.9	14314.2	13085.6	13526.9	13230.2
Tonga	44.9417	47.3544	51.642	73.6837	48.4672	87.0984	33.9542	105.13	103.056	110.988	129.484	104.899	70.0176	2.96222	48.5531	27.3666	110.096	92.1969	104.769	83.3301	111.482
Trinidad and Tobago	1697.27	2411.21	2589.1	1400.6	1729.21	2104.13	2180.13	1831.19	1868.19	1582.25	2355.22	2924.14	849.772	961.162	803.845	1583.26	1721.68	1663.13	692.28	682.118	610.027
Tunisia	8768.76	9805.68	9985.65	11227.3	9754.71	9941.63	20928.7	19725.3	18678.7	12783	12371	11186.7	11369	13504.6	13155.2	15343.9	19552.1	15437.8	24789.8	21174.7	21097.2
Turkey	51077.8	59385.5	64132.7	64290.3	54621	43732.6	93741.8	79958.4	75767.6	71317.3	76116.8	77618.5	69851.7	74010.8	77245.2	77327.5	83386.5	98270.8	96247	105306	99355.8
Turkmenistan	66026.8	66458.7	30364.3	33576.3			53767.9	54926.8	50140.8	46772.6	56337.1	70115.3	49169	54482.4	62527.8	71459.5	70271.6	71664	73922.5	68181.3	74099.7
Turks and Caicos Islands	63.8207			73.771	80.7343	92.8081	90.0659	91.0373	77.5336	73.9123	60.0042	55.0093	48.7517	56.2592	66.8134	79.6061	7.98824	4.2062	26.3869	5.37273	5.8647
Tuvalu			0.393724	0.475733		0.207739			0.233714	0.157709	0.16521	0.181124	0.197119	0.179291	0.461999		0.280924				0.282388
Tanzania	66726.5	57050.6	48153.1	37531.4	40943	46074.5	88913.1	92211.7	120214	97573.2	99796.8	91411.4	128561	110172	110500	138046	125189	128666	121351	154042	157224
Uganda	12864.1	16536.7	15524.2	12709.8	13688.8	12083.2	20906.8	19286	19807.7	21813	19925.6	16996.4	28352.5	25964.1	27219.8	30114.6	33741.9	38738.1	41876.8	37934.7	38439.1
Ukraine	185961	200857	180099	159564	251268	217744	276874	289492	290330	334853	326902	319302	305236	340580	291911	323896	321019	323975	316802	322791	332544
United Arab Emirates	1962.64	2304.95	2461.72	2076.42	2837.44	2533.61	3329.24	3400.82	3574.25	2928.6	3306.83	2897.15	3375.24	3182.45	2627.71	2593.36	2670.61	2520.34	2881.08	2420.87	2411.22
United Kingdom	22654.5	22880.1	22730.4	26821.6	21233.9	24347	46741	47040.5	48342	51300.1	54039.6	56537.3	53087.5	47817.8	45354	52530.3	54812.2	51689	52119.3	51764.8	54639.5
United States	862000	850108	907694	947405	674529	738662	1.31693e+06	1.02996e+06	1.31725e+06	1.12516e+06	1.15364e+06	1.14262e+06	1.37065e+06	1.58044e+06	1.45264e+06	1.57117e+06	1.67407e+06	1.7519e+06	1.74203e+06	1.85348e+06	1.84942e+06
Uruguay	39735.3	68167.3	69989.6	40602	63282.1	52711	79749.7	79812.8	94021.9	106235	107903	109983	108097	107732	99395.2	109996	103976	104272	97027	107205	106913
Uzbekistan	35448.5	35787.5	30664.4	29763.1	24678.7	28073.5	42238.2	40926.8	49504.7	56498.9	46891.1	44641.4	45625.6	43060.4	38187.5	49510.4	50026.7	37092.9	38884	34850.1	39409.2
Vanuatu	2270.56	2463.29	2712.73	2126.32	1914.92	2014.73	2896.62	2291.86	3978.76	1797.81	4581.13	7284.36	2031.01	3881.34	2907.31	1794.96	4666.66	5519.37	5593.48	4770.02	4926.63
Venezuela	52938.9	70718	60218.9	30662.8	39286.5	34120.9	34670.8	63030.9	49257.2	62515.5	61195.3	56991.7	39274.8	32987.9	8315.11	32515.2	31539.3	25175.9	17771.4	24331.4	24406.5
Vietnam	43770.4	59959.3	66424.9	58436.4	76413.9	77929.7	97603.4	96865.7	95720.1	107580	108183	102400	109873	96183.1	80505.9	98807.5	92288.9	101578	106880	109817	112906
Yemen	10642.2	14794.5	13522.2	9757.85	35851.4	35148.1	23281.4	21278.2	15926.9	19327.6	21984.8	22179.9	21463.6	22387	14771.9	23683.8	25806.7	25712.6	25513.2	17816	15700.4
Zambia	87902.1	86953	106773	50120	62745.7	73485.6	145605	90809	107927	107023	93904.9	86683.2	103463	91565.4	100242	116510	150331	204299	159939	235482	222976
Zanzibar	252.998	270.722	310.879	117.306	274.981	120.321	508.453	499.163	367.981	475.521	449.74	393.053	314.236	496.469	254.098	517.164	298.22	585.694	582.16	608.402	380.887
Zimbabwe	61388	75847.1	73298.4	83386.8	86717.1	101004	123812	89782.8	61578.5	74359.8	50471.3	35941.7	36489.5	42791.6	23777.4	46015.8	40325.8	46763.3	30845	30940.4	29382.3
Taiwan	20981.5	21515.7	21973.1	18135.5	22705.5	11630.9	23357.8	22531.8	25046.1	24001	24187.1	24799	14231.3	24329.4	24685.2	24893.1		24968.3	25301.6	26199.6	17419.8
World	1.05707e+07	1.12471e+07	1.15049e+07	1.2112e+07	1.28524e+07	1.54746e+07	1.99758e+07	1.99427e+07	1.83885e+07	1.98757e+07	2.0064e+07	2.04974e+07	2.15323e+07	2.18074e+07	1.54745e+07	2.06605e+07	2.0765e+07	2.06168e+07	2.14218e+07	2.24711e+07	2.3256e+07

## Sheet: land_exports_growth
Country Name	1995	1996	1997	1998	1999	2000	2001	2002	2003	2004	2005	2006	2007	2008	2009	2010	2011	2012	2013	2014	2015
Afghanistan	N/A	1	1.02769	1.13674	1.13598	N/A	N/A	1.5342	1.53426	0.956448	0.799067	0.824711	0.648591	0.488232	0.31184	0.117554	0.293252	0.0765197	0.139179	0.148294	0.0989619
Albania	1	0.956216	0.917973	0.702607	1.38312	1.83555	3.88362	2.56281	2.04457	2.07937	2.19272	3.37178	3.75424	3.70161	4.30492	3.89238	3.5636	3.15014	3.15029	3.22712	3.30464
Algeria	1	0.805065	0.892574	0.831342	0.820654	1.09894	1.33686	1.33667	0.963076	1.02007	1.14401	1.20019	1.74849	1.41637	0.874816	1.40237	2.02638	1.74029	1.02894	0.872248	0.944969
Andorra	1	0.756069	0.597823	0.154946	0.116935	0.109695	0.726012	0.743776	0.437347	0.636349	0.481253	0.579716	0.94326	0.880898	0.237239	0.472933	0.364874	0.444753	0.375074	0.332708	0.343984
Angola	1	2.09357	1.39166	1.3628	1.6261	1.10269	4.65574	4.34448	1.13495	2.06641	1.51267	1.59815	1.44679	1.38855	1.01373	1.37716	1.36477	2.26842	1.58243	1.79166	2.30112
Anguilla	1	1.00789	1.03343	1.10012	0.85603	0.860399	1.02207	0.969631	0.980576	N/A	0.94431	0.676317	0.650976	0.598701	0.803192	0.780962	0.896056	0.143489	0.0759253	0.0521368	0.0425517
Antigua and Barbuda	1	1.91331	1.94084	0.584456	1.06748	1.5603	3.58624	2.53486	2.41727	1.16633	1.13255	0.618455	0.544107	0.565828	1.25181	0.706093	0.980035	0.696635	0.678532	1.9748	0.465418
Argentina	1	1.01526	1.05527	0.955935	0.961755	1.00348	1.22439	2.31594	2.14679	2.65351	2.58828	2.44904	2.42851	2.4932	2.2244	2.28322	2.29034	2.22307	2.37504	2.45575	2.45417
Armenia	1	1.33309	1.12101	1.41955	1.13894	1.18251	1.44962	3.37387	2.53734	2.02827	2.83436	2.31863	1.47521	1.73947	0.809446	1.74732	1.72701	1.87072	2.46125	3.05506	3.50719
Aruba	1	3.88381	1.62605	5.49262	6.54311	0.822937	1.63381	1.57419	0.994598	1.08961	2.00425	1.1306	1.21911	0.486205	0.573014	1.62758	1.4477	0.78586	0.767348	0.303293	0.289536
Australia	1	1.03709	1.00478	0.978737	0.990183	1.16514	1.24961	1.21102	0.996316	1.10301	1.1896	1.21721	1.26657	1.4985	1.2246	1.62065	1.65769	1.54829	1.6814	1.8996	2.02537
Austria	1	0.868862	0.987719	1.83779	1.35745	2.06923	3.06061	3.15769	3.11873	3.00778	3.21916	3.32894	3.7224	3.70907	3.3235	3.87846	4.04489	3.87923	3.86695	3.82767	3.82711
Azerbaijan	1	0.739048	1.17434	1.01727	1.19761	1.7829	3.09053	1.66031	1.42051	2.22386	3.01988	3.0766	3.12027	2.92873	1.39089	2.33269	2.35159	2.11761	1.92762	1.63129	1.75888
Bahamas	1	0.588732	0.507269	0.792845	0.615815	0.563653	1.14651	1.58108	0.982194	0.424659	0.22402	0.361791	0.387388	0.548025	0.220137	0.141958	0.294101	0.112315	0.167427	0.0345882	0.0338051
Bahrain	1	0.686143	0.656385	0.896974	0.913574	0.889107	1.12659	2.383	3.23686	2.11431	2.51378	2.06408	2.49676	2.22569	2.76949	2.28805	2.05269	2.18384	2.38466	2.15691	1.67977
Bangladesh	1	1.07784	1.17852	0.86224	1.32697	1.32541	2.51306	2.5125	2.00522	2.22717	2.35401	2.24799	1.90273	1.89787	1.78405	1.97594	2.49922	2.81819	2.72761	2.63903	2.70032
Barbados	1	0.679133	0.598181	0.449059	0.685827	0.463825	0.937426	1.12511	1.03162	0.836364	0.430547	0.49518	0.338678	0.327811	0.480743	0.356342	0.342542	0.310044	0.25683	0.226169	0.131395
Belarus	1	0.953416	1.18876	0.998699	1.25601	1.25601	1.86647	1.72851	1.79711	1.90889	2.02706	1.87449	2.01669	1.93438	1.08313	1.65364	1.85781	1.93015	1.6622	1.67267	1.69779
Belgium	1	1.01355	1.06279	0.840852	1.10145	1.38152	2.20972	2.19614	1.8895	2.08034	2.16855	2.19702	2.15685	2.26068	2.08105	2.17071	2.27255	2.1718	2.21764	2.24684	2.27785
Belize	1	1.11424	0.754651	0.982434	0.520785	0.681171	0.876122	0.991165	0.889952	1.13431	0.625391	0.831117	0.873226	0.945379	0.829738	1.2608	1.03417	1.2776	1.30052	1.3349	1.3439
Benin	1	1.13745	1.19443	0.890069	1.17307	0.880587	1.29907	1.41234	1.26499	1.10563	1.08797	0.952299	1.52291	1.59661	1.38218	1.92568	1.50642	2.18896	2.54467	2.73443	2.74696
Bermuda	1	0.146546	0.137825	0.967416	0.143566	0.0859991	0.116218	0.00747007	0.177081	0.0914119	N/A	0.00839601	0.0155692	0.0435442	0.0375544	N/A	N/A	0.011419	0.00265989	0.00408667	0.00475752
Bhutan	1	0.926599	0.927697	0.858245	1.5176	0.733285	0.730045	0.690138	0.917304	0.636085	1.03858	2.59036	2.90044	2.75783	2.21714	1.45387	1.19807	1.23663	1.01129	0.53291	0.939032
Bolivia	1	0.962638	0.846862	0.531914	0.778312	0.784011	0.863761	1.0464	1.25474	1.41475	1.54926	1.9349	1.82454	2.02306	1.47384	1.98809	1.8529	2.14856	2.26515	2.14947	1.73128
Bosnia and Herzegovina	1	1.508	1.62794	1.10134	1.80355	2.28371	2.63412	1.84305	3.63792	3.1277	4.23085	4.66401	3.98581	3.67667	4.16934	3.0733	2.43951	2.37724	2.36175	2.41709	2.46769
Botswana	1	1.45702	1.52093	0.907542	1.77293	1.92024	1.90567	1.86664	1.61493	1.74861	2.20385	1.90371	1.32378	1.69611	0.92574	1.36857	1.05667	1.58089	1.789	1.68517	0.660355
Brazil	1	1.10282	1.19844	1.17395	1.48758	1.36851	3.27444	2.95476	3.0923	3.87632	3.76072	3.9594	3.80682	4.0951	3.74387	4.18313	3.6036	4.52194	7.76777	8.54954	9.16582
British Virgin Islands	1	1.05319	N/A	N/A	N/A	0.724118	0.944794	1.02438	1.05276	0.992838	0.500171	0.474336	0.418594	0.442964	0.668215	0.481248	0.350485	0.562253	0.570365	0.527603	0.595556
Brunei Darussalam	1	0.804333	0.680673	0.593522	0.736133	0.544554	0.754399	0.863936	0.377145	0.291146	0.232865	0.227046	0.394621	0.355734	0.414895	0.466307	0.930974	0.993322	0.675387	1.28414	1.003
Bulgaria	1	1.2275	1.14397	0.967256	0.855348	0.779412	1.44533	1.20294	1.26321	1.47905	1.3629	1.28024	1.36187	1.48397	1.18521	1.58503	1.68443	1.67795	1.78091	1.74657	1.79369
Burkina Faso	1	0.743169	0.794745	1.22469	0.759597	0.706907	2.89185	2.04867	1.19924	1.63974	1.11439	1.13645	1.22504	1.45053	1.57263	2.25767	3.16116	3.32747	3.69666	4.27443	3.95252
Burundi	1	0.425089	0.856699	0.643563	0.649096	0.635702	0.666592	1.24437	0.629179	1.26488	0.543836	0.902061	0.533192	0.948946	0.529105	1.07091	0.865592	0.866567	0.963158	0.992491	1.07694
Cabo Verde	1	0.916702	1.28257	1.29968	1.30725	1.20101	2.6106	1.88534	1.35157	0.907658	0.60631	0.645138	0.873875	0.813932	0.557271	0.602726	0.645324	0.73707	1.2958	1.16103	1.32032
Cambodia	1	0.82496	1.25921	0.996196	1.64066	1.65348	1.87333	1.97593	1.94621	2.21248	2.0682	2.21935	2.38823	2.29748	1.32273	1.37633	1.13248	1.39123	1.93373	1.85401	1.90739
Cameroon	1	1.23129	1.47208	0.846837	2.82156	2.77719	2.97946	2.80058	2.62493	2.72917	2.8627	2.93197	2.87635	2.84111	2.61044	2.25855	1.88577	2.1196	2.3705	2.29478	2.34969
Canada	1	1.02405	1.06766	0.95698	1.13578	0.975852	1.34021	1.16599	0.972044	1.10769	1.11489	1.0485	1.17637	1.1651	1.00322	1.17912	1.15908	1.16841	1.25971	1.32266	1.35893
Cayman Islands	1	4.18045	2.35062	3.82252	1.72279	1.63434	2.51851	1.99082	2.32685	0.563991	0.652118	N/A	0.94001	0.650888	2.04695	0.570154	0.441873	0.383329	0.359403	0.424051	0.397365
Central African Republic	1	1.09987	1.43122	1.23227	1.3661	3.48535	3.33901	3.32165	3.90512	3.48603	3.58066	3.79817	7.78506	6.50301	8.86377	5.59533	4.40875	5.76303	7.95538	7.77667	7.80613
Chad	N/A	N/A	N/A	N/A	N/A	N/A	N/A	N/A	N/A	N/A	N/A	N/A	N/A	N/A	N/A	N/A	N/A	N/A	N/A	N/A	N/A
Chile	1	0.91322	0.859153	0.591189	0.980695	0.673386	1.62549	1.64651	1.65793	1.68412	1.68161	1.59788	1.65143	1.68848	1.73476	1.2453	1.19244	1.13275	1.14212	1.26707	1.23971
China	1	1.01774	1.32427	2.58639	1.42438	2.53909	1.53868	1.54448	1.96772	1.99505	2.32139	2.6569	2.95415	2.57638	2.09621	2.0944	2.00096	2.13915	2.0951	2.19482	2.25837
Hong Kong	1	0.219206	0.195942	0.975793	0.50652	0.392622	0.360617	0.535924	1.05818	0.688795	0.85142	1.0311	1.2122	0.613056	0.963115	0.775152	0.801684	0.946639	0.778659	0.665117	0.682294
Macao	1	0.623606	0.636808	1.04754	0.684777	0.705149	0.875402	0.932713	0.794542	0.972103	0.0987633	0.0539296	0.0026965	0.0486152	0.839371	0.848185	0.0556604	0.0616413	0.045909	0.0806884	0.14325
Colombia	1	0.932051	0.98321	0.874901	1.06158	1.01075	1.4234	1.36369	1.30141	1.83848	1.75272	1.91181	1.87146	2.25714	1.6664	1.4399	1.31499	2.39859	2.32329	1.92706	1.91357
Comoros	1	1.00418	1.02275	0.657706	0.762291	0.956345	N/A	1.25632	1.24838	1.09196	0.737176	0.904669	0.761737	0.755031	0.705756	1.02299	0.797353	0.690779	N/A	N/A	N/A
Congo Republic	1	1.20678	1.47607	1.11045	2.33343	2.34532	2.47358	2.47837	2.28037	2.53526	2.71247	2.80306	2.88812	2.92738	2.8783	3.01618	1.83786	2.95985	2.0362	1.95017	2.07966
Cook Islands	1	1.06396	1.11139	1.04912	1.29625	1.49807	1.68529	N/A	1.3409	N/A	N/A	N/A	N/A	N/A	N/A	N/A	N/A	1.64537	N/A	1.53604	1.60179
Costa Rica	1	1.81854	1.94265	1.10547	2.00472	1.89254	1.89007	1.83319	1.7738	2.0847	2.20515	2.24076	2.32834	2.23082	2.35826	2.12618	1.96651	2.07728	1.96356	1.93126	1.96475
Croatia	1	1.12715	0.551499	0.987994	1.60365	1.00477	1.48563	1.48687	4.22771	2.43106	2.39312	2.47146	3.16304	2.60415	3.33012	1.74144	1.54509	1.83096	1.33614	1.45918	2.25787
Cuba	1	1.03524	0.995016	1.14878	1.0312	0.692529	1.87184	1.52831	1.23152	1.01139	1.08718	0.791521	0.885192	0.749967	1.0582	1.02416	0.915968	0.935565	1.0256	1.20942	1.07982
Curacao	N/A	N/A	N/A	N/A	N/A	N/A	N/A	N/A	N/A	N/A	N/A	N/A	N/A	N/A	N/A	N/A	N/A	N/A	N/A	N/A	N/A
Cyprus	1	1.09637	1.19542	1.16432	1.18814	1.02874	4.21285	3.58885	4.1137	4.37725	4.33236	3.54262	3.44402	3.26944	3.43418	4.48276	4.72357	4.65683	5.51148	5.89773	5.82826
Czech Republic	1	0.699881	0.779725	0.73609	0.910571	1.19291	1.5324	1.44947	1.54835	1.68608	2.0068	2.00275	2.10288	2.04796	2.07322	2.25692	2.23807	2.36506	2.38971	2.42178	2.4838
Cote d'Ivoire	1	1.12531	1.13265	1.03794	1.29727	1.05258	1.24247	1.2915	1.14823	1.22229	1.25516	1.33759	1.41072	1.47173	1.481	1.47537	1.45326	1.41286	1.32732	1.32058	1.32212
North Korea	1	1.17826	1.59798	0.844253	0.998315	0.452365	0.502871	1.40844	N/A	1.24238	0.957185	1.01851	1.73959	2.49333	0.905693	1.40214	0.968382	1.07986	1.28848	3.10157	3.34782
DR Congo	1	1.30524	1.51401	0.899511	2.17689	1.72655	2.88877	2.75481	2.69362	2.8686	2.78666	2.66783	3.17471	3.05909	2.60816	3.40273	2.84637	2.99266	2.8098	2.29936	2.26537
Denmark	1	1.0301	0.858336	0.778576	0.827136	0.922078	3.08828	3.00912	2.96522	2.85439	3.00671	2.88219	2.86785	3.04739	2.72586	3.21836	3.36285	3.34243	3.39685	3.42505	3.39692
Djibouti	1	0.925493	1.05847	1.09154	1.35322	1.99232	1.47184	1.37392	0.85816	0.816991	1.05078	2.60893	3.86193	3.92232	N/A	3.82885	4.06639	2.94223	3.84628	0.819506	0.817129
Dominica	1	1.23631	1.24342	1.28857	N/A	0.519588	2.85899	1.36124	1.50577	1.61465	1.62078	1.40109	1.03786	0.524272	0.835729	0.493926	0.67381	0.529493	0.816448	0.704208	0.433259
Dominican Republic	1	0.935649	0.933821	1.02583	0.855925	0.917	1.40295	1.32805	1.16933	1.13675	0.88234	0.886347	0.847331	0.72992	0.611036	0.59023	0.775412	0.631739	0.699003	0.742675	0.789491
Ecuador	1	1.55209	1.34174	0.930618	2.10632	1.81471	1.8895	1.62655	1.63776	2.22173	2.16764	2.37037	2.48045	3.05644	1.40245	2.36925	2.80468	2.97006	3.0334	3.08955	3.17776
Egypt	1	0.936354	0.95331	0.55547	0.863142	0.721877	1.60512	1.57536	1.63272	2.42877	2.60262	2.50519	2.57106	2.61787	1.95986	1.96936	1.8476	1.61341	1.69529	1.45388	1.60586
El Salvador	1	0.94765	1.11844	0.929703	1.10529	1.12423	1.33118	1.27993	1.12174	1.26115	1.22099	1.14497	1.17675	1.23928	1.08584	1.43285	1.83098	1.58065	1.8002	1.62395	1.69462
Equatorial Guinea	1	2.95605	3.18381	2.85079	3.17192	2.44068	3.18681	3.20837	3.15396	3.15681	3.17869	3.10774	3.27632	3.22302	3.08231	2.25778	N/A	2.02043	3.13556	2.58403	3.42479
Eritrea	1	1.39929	1.51963	0.828258	0.708055	0.68043	0.893544	0.913753	0.463968	0.500188	0.471135	0.472106	0.47053	1.00127	1.59834	0.809537	0.827123	1.35363	1.06756	1.05658	0.748936
Estonia	1	0.968196	0.883073	1.12428	0.954949	1.13816	1.79349	1.80263	1.81504	1.74427	1.79343	1.72336	1.83998	1.95216	1.67611	2.09099	2.24275	2.14576	2.25055	2.23932	2.25973
Ethiopia	1	0.825889	1.10298	1.12256	0.985503	1.26763	2.98375	2.70898	2.60354	2.74202	2.46011	2.37955	2.24879	1.67329	1.59257	2.52926	3.26872	2.41193	2.40412	2.40253	2.18155
Fiji	1	1.29791	1.16134	1.65229	1.1404	1.12682	0.923135	1.45707	1.74215	1.88502	1.95799	0.927478	1.18864	1.54745	1.99174	1.24769	0.648592	1.1087	1.1368	1.06723	0.992825
Finland	1	1.10019	1.09008	0.557651	1.04961	0.41878	1.42756	1.42361	1.37898	1.35586	1.21559	1.14858	1.22917	1.07978	0.916428	1.1436	1.14259	1.15423	1.21093	1.2004	1.21255
Netherlands Antilles	1	1.46444	1.56984	1.04342	0.846316	1.50843	0.621378	0.526169	0.44346	0.283995	0.282371	0.367758	0.217584	0.218037	0.200574	0.0198296	0.0800168	0.0806949	N/A	N/A	N/A
France	1	1.04522	1.20087	1.46479	1.02317	1.36427	2.20397	2.00976	2.05257	2.08308	2.05932	2.16723	2.17006	2.37159	2.06076	2.30689	2.4876	2.35198	2.52291	2.40029	2.50197
French Polynesia	1	0.931808	0.985413	1.17981	1.00913	1.19642	1.48486	1.28976	1.18535	0.74651	0.840832	0.763261	0.683515	0.671566	0.506453	0.639316	0.844903	0.827948	0.746372	0.67401	0.777635
Gabon	1	0.992706	1.37287	0.720711	2.06853	1.73451	2.46668	2.27914	2.57274	2.32687	2.51187	2.593	2.66271	2.50764	2.95582	2.50852	2.13765	2.40703	1.68987	1.61066	1.71581
Gambia	N/A	N/A	N/A	N/A	N/A	N/A	N/A	N/A	N/A	N/A	N/A	N/A	N/A	N/A	N/A	N/A	N/A	N/A	N/A	N/A	N/A
Georgia	1	1.25927	1.54864	0.951779	2.18939	2.28442	3.22362	3.28668	4.09258	3.60525	3.28842	2.51098	2.27253	2.47103	1.90148	3.46699	2.90895	3.17854	2.42563	2.81005	2.8438
Germany	1	1.02066	1.10484	1.64716	1.26649	1.86392	2.92258	2.97534	2.93097	2.98823	3.31386	3.48439	3.64604	3.53783	3.33932	3.60785	3.58044	3.64055	3.75221	3.80218	3.88404
Ghana	1	1.02866	1.04721	1.32987	1.33772	1.80235	3.1064	3.00021	3.25902	2.51902	2.04713	2.47039	2.6817	2.64192	2.78189	2.86417	3.54011	3.85177	3.54406	3.7517	3.63919
Greece	1	0.705283	0.865613	1.00272	1.29445	1.02328	3.02682	2.44093	2.45306	1.92551	2.96718	2.97432	2.80575	2.80203	2.01788	3.73805	4.45156	5.07498	5.38171	5.91354	5.51104
Greenland	1	2.07306	1.40023	1.04025	1.36973	0.301923	2.34197	1.7681	2.51764	2.25362	2.42621	1.16613	1.84989	1.04423	1.45409	0.920973	0.256812	0.250094	0.273908	0.398544	0.400602
Grenada	1	1.35744	1.27022	1.0825	1.65138	1.3328	1.56867	1.59276	3.49977	1.29196	0.34371	0.297292	0.339356	0.189761	0.405933	0.173093	0.190374	0.19107	0.192088	0.367315	0.315159
Guatemala	1	1.63401	1.60363	1.05105	1.65487	1.66674	1.97069	1.62219	1.56806	1.83881	1.74256	1.72402	1.54451	1.41802	1.35707	1.60083	1.58682	1.38823	1.23237	1.23589	1.22391
Guinea	1	0.851299	0.94866	1.06201	1.45379	1.00181	2.06798	1.27104	1.09535	0.940548	1.40129	1.85679	1.70696	2.40233	1.3709	1.95248	1.49009	1.6239	1.55712	1.81502	1.82036
Guinea-Bissau	1	0.867136	1.24817	0.863247	1.46539	2.37337	2.67722	1.77543	1.69827	1.97703	1.99293	1.58219	2.19425	2.18333	2.17004	2.84254	3.44008	2.51403	3.03229	3.59691	4.63006
Guyana	1	1.07016	0.993854	1.08447	0.982365	0.865235	1.23547	2.21641	1.16001	1.14047	0.736776	0.817159	0.689918	0.699892	0.89045	0.536536	0.517422	0.600825	2.40783	2.44084	2.41301
Haiti	1	1.51927	1.44505	1.11736	1.79419	1.96006	1.82173	1.96183	2.37068	1.58771	1.75792	1.66876	1.29185	N/A	N/A	N/A	N/A	N/A	N/A	N/A	N/A
Honduras	1	1.52538	1.54987	1.05598	1.52968	1.5377	1.58401	1.23894	1.54119	1.76308	1.76973	1.75507	1.6721	1.57343	1.29585	1.52638	1.49159	1.55911	1.69408	1.63875	1.6554
Hungary	1	0.964165	0.949719	1.05727	1.0405	1.25124	2.10701	2.10582	1.9952	1.85209	2.05277	2.33036	2.6407	2.75782	2.6405	2.68393	2.67427	2.76737	2.69525	2.68086	2.7775
Iceland	1	1.26583	1.30054	0.898867	1.23762	1.01812	2.01154	1.95207	1.91946	1.91818	1.55068	1.74665	1.89651	1.93072	2.28666	1.97654	2.06513	2.08202	1.74773	1.6382	1.69536
India	1	1.07978	1.34192	2.83569	1.42646	1.58012	2.5001	2.67727	2.50836	3.39334	2.87014	3.1419	3.13465	3.62314	2.72553	3.33925	3.83976	4.30135	4.62203	3.87247	3.64535
Indonesia	1	1.09175	1.02291	1.29118	1.58306	1.53546	1.83252	1.51595	1.05674	1.31609	1.43592	1.12733	1.09954	1.04549	0.678859	0.79994	0.896961	0.65247	0.748749	0.756798	0.746827
Iran	1	1.09303	0.905964	0.53792	0.957025	0.80926	1.15778	1.19231	1.16728	1.18619	1.4051	1.4604	1.47083	1.26624	0.897754	1.49635	1.29211	1.10481	1.34732	1.05061	1.31514
Iraq	1	1.42716	3.21674	2.27609	3.2265	2.33012	2.82982	3.33319	3.26411	2.80235	1.98074	1.55893	1.41286	1.68746	0.592591	0.943962	1.27449	1.38542	1.32681	1.03159	1.12684
Ireland	1	1.02151	1.13985	1.19304	1.11709	1.42525	3.12166	3.36957	2.77784	2.7948	3.21697	2.92654	2.94621	3.1516	2.71087	3.33719	3.21969	3.13938	3.23749	3.36433	3.39246
Israel	1	0.935573	0.927078	0.720826	1.07625	0.936756	1.74449	1.65943	1.73573	1.78355	1.56696	1.44947	2.01302	1.70862	2.15348	2.62544	2.77939	2.77863	2.47229	2.35813	2.20857
Italy	1	0.877707	0.842109	0.928623	0.735104	0.711694	1.1682	1.11411	1.02945	1.01248	1.06313	1.07707	1.16852	1.18154	1.07903	1.2556	1.34896	1.41854	1.44472	1.49294	1.52884
Jamaica	1	0.689776	0.667774	0.815954	0.783553	0.777368	0.896572	0.860904	0.816827	0.633017	0.492372	0.665895	0.463294	0.425631	0.466021	0.441338	0.305772	0.460039	0.45074	0.404837	0.405644
Japan	1	1.0564	1.12973	1.19773	1.13948	1.097	1.33821	2.07714	1.18269	1.20961	1.28488	1.57561	1.69036	1.8523	1.7232	2.06253	2.43467	1.94251	2.47275	2.87431	3.10712
Jordan	1	1.41067	1.37765	0.882581	1.31597	1.22542	1.08544	1.14383	1.125	0.865476	0.981777	0.968924	0.736438	1.19626	1.0779	0.956999	1.26096	1.34851	1.82065	1.64999	1.68186
Kazakhstan	1	0.923236	0.907889	0.8823	0.891593	1.15268	1.21995	1.24943	1.35537	1.28409	1.2034	1.23087	1.21187	1.368	0.785802	1.11362	1.21257	1.15799	0.947175	1.05571	0.683828
Kenya	1	1.04472	1.00567	0.887096	0.952102	0.886037	1.22908	1.36898	1.36653	1.38822	1.26	1.28598	1.21314	1.22547	1.18309	1.22107	1.14356	1.10875	1.06819	0.936233	0.958697
Kiribati	1	2.00811	2.77346	3.5142	1.38328	1.15173	N/A	1.49141	21.5516	2.11285	N/A	3.3388	16.0178	15.905	0.192639	1.95517	0.408323	5.78633	17.5843	16.9268	7.48053
Kosovo	1	1.00667	0.978113	0.928879	0.948425	0.867271	1.71767	1.70035	1.6348	2.10434	1.71741	2.30263	1.51512	2.16144	2.1056	3.27532	1.48575	2.94565	2.41313	2.85185	1.29539
Kuwait	1	0.815397	1.24373	0.604472	0.887426	1.09104	2.45487	2.01763	1.49597	1.53998	2.90534	3.01622	3.03761	3.00531	2.36327	2.93096	2.88723	2.91652	3.23063	3.21898	3.03515
Kyrgyz Republic	1	1.06312	1.63011	1.32129	1.60141	1.70951	1.94282	1.90939	2.02262	2.34709	1.95074	1.74304	2.04126	2.05067	2.46214	2.35329	2.25645	1.94877	1.82387	0.725002	0.602252
Laos	1	1.16922	1.30985	1.20566	1.57923	1.71081	1.93276	2.08639	1.80857	2.1869	2.54652	2.46839	2.87606	2.27738	1.1299	1.56664	0.592912	1.36486	2.04136	2.13263	2.1618
Latvia	1	1.05349	0.883052	0.805095	0.704923	0.943404	2.5829	2.5457	2.60619	2.55514	2.75547	2.62661	2.91685	3.06572	2.44395	3.59476	3.82641	3.86287	4.03095	4.14439	4.25901
Lebanon	1	1.06044	0.920993	0.897253	0.816029	0.834852	1.32039	1.5723	1.2597	2.13456	1.85361	2.0155	2.19505	2.17745	2.1118	1.95374	2.25945	1.91557	1.99789	2.59486	2.67546
Lesotho	1	1.76825	2.17637	2.76957	1.83263	2.19359	3.51323	3.89615	4.17096	4.07837	3.45004	3.38502	3.22876	4.61556	4.35252	4.43068	5.15512	4.09342	4.07803	4.3574	5.33843
Liberia	1	0.813345	0.754824	0.810712	2.10756	1.81993	1.96644	1.96875	2.62726	0.382275	0.363662	0.303482	0.404106	0.324972	0.232146	0.307545	0.704221	1.00259	0.988677	1.15478	1.1777
Libya	1	0.573557	0.637966	0.563044	0.464813	0.504084	1.09899	1.1086	2.16324	1.23119	1.2029	3.07292	1.64389	1.75897	0.742138	0.851532	0.85654	1.71292	1.04134	1.0594	0.889014
Liechtenstein	N/A	N/A	N/A	N/A	N/A	N/A	N/A	N/A	N/A	N/A	N/A	N/A	N/A	N/A	N/A	N/A	N/A	N/A	N/A	N/A	N/A
Lithuania	1	0.601962	0.390742	0.746501	0.188877	1.00874	2.34823	2.32981	2.4468	2.23276	2.73235	2.77747	2.96797	3.36798	2.07582	3.37346	3.69299	3.82197	3.84415	3.8181	3.78271
Luxembourg	1	1.06773	1.10221	1.25502	1.25879	N/A	1.86423	2.05255	2.09148	2.08258	2.24321	2.29891	2.3045	2.30969	2.41129	2.35986	2.32012	2.31323	2.3192	2.32468	2.3402
Madagascar	1	0.797717	0.99238	0.392692	2.21139	2.76575	2.77903	2.3671	1.25572	1.97349	2.17437	2.91979	2.14466	2.82492	1.30548	1.87588	1.56388	1.79414	1.77618	1.90679	1.98084
Malawi	1	0.375913	0.547765	0.989239	0.794944	0.653992	1.17962	0.82387	1.67999	1.12254	0.958756	1.08989	1.64877	1.31196	1.21299	1.20595	2.2508	1.95548	2.52387	2.18535	2.16336
Malaysia	1	1.1567	1.19767	1.42731	1.40834	1.31105	1.51888	1.58752	1.75944	1.67488	1.71138	1.50327	1.66317	1.6308	1.56358	1.41587	1.40415	1.36097	0.844815	0.813242	0.841914
Maldives	N/A	N/A	N/A	N/A	N/A	N/A	N/A	N/A	N/A	N/A	N/A	N/A	N/A	N/A	N/A	N/A	N/A	N/A	N/A	N/A	N/A
Mali	1	0.907886	1.20375	1.03974	1.14561	1.33881	5.16609	5.37011	5.19228	4.18094	3.21086	4.3472	4.76551	3.79288	1.24665	3.91619	3.91877	4.29526	1.62877	1.67771	1.61458
Malta	1	0.392974	0.340999	0.519806	0.366761	0.370952	0.759917	0.953605	0.950925	0.983349	1.03131	0.887583	0.984828	1.05613	1.07037	0.978021	1.13267	0.988542	1.19278	1.01055	1.01587
Marshall Islands	1	0.89639	0.922491	N/A	0.54743	0.501152	1.09153	0.549125	0.634433	0.390415	0.434903	0.321589	0.341911	0.362874	0.366037	0.328326	0.124705	0.263802	0.210515	0.14568	0.182716
Mauritania	1	1.16188	1.0385	1.39124	0.979651	1.01655	1.17121	1.16877	0.688382	0.799513	0.798373	1.29701	0.675219	0.449945	0.732164	1.05416	0.544922	1.02732	0.810606	1.16097	1.24303
Mauritius	1	1.01103	0.949177	1.08097	0.975277	0.888584	1.54053	1.34698	1.04112	0.920712	0.852874	0.858127	0.827475	0.829396	0.80807	0.765909	0.761503	0.720195	0.78145	0.818456	0.8199
Mexico	1	1.05284	0.681541	0.545996	0.713462	0.702088	1.10288	0.768114	1.03275	0.875586	0.88195	1.07509	1.02423	0.923282	0.99188	1.16979	1.2932	1.40606	1.96476	2.29791	2.53856
Micronesia, Fed. Sts.	1	N/A	0.931077	0.997947	0.952587	1.01837	1.22485	1.25567	1.11459	0.831023	0.956442	0.848286	1.19884	1.27333	1.15359	1.24093	2.12724	6.04939	5.4375	0.804006	0.800009
Monaco	N/A	N/A	N/A	N/A	N/A	N/A	N/A	N/A	N/A	N/A	N/A	N/A	N/A	N/A	N/A	N/A	N/A	N/A	N/A	N/A	N/A
Mongolia	1	0.860232	1.36605	1.05377	1.4282	1.41483	1.96442	1.94019	2.28524	1.94007	1.63148	2.41125	2.27197	1.63417	1.64226	2.66981	1.79998	1.36912	1.23183	1.82964	1.60833
Montenegro	1	2.00731	2.05413	1.0133	1.48534	1.40405	3.14675	3.98026	2.59064	4.52313	4.72376	4.07913	3.91234	2.5912	2.12938	1.57821	1.23207	1.14541	1.34615	1.31247	1.34071
Montserrat	1	1.70489	N/A	0.520547	0.582961	0.68278	0.625307	0.601841	0.499018	0.321387	0.102935	0.258642	0.561207	0.0993496	0.0967229	0.363899	0.120865	0.214836	0.0770057	0.227695	0.088915
Morocco	1	0.939232	0.982477	0.874159	1.0402	0.840298	1.56083	1.60841	1.52936	1.42343	1.46243	1.56539	1.59358	1.60466	1.39336	1.51785	1.57336	1.51322	1.41859	1.56841	1.47218
Mozambique	1	1.4331	1.21413	1.01505	2.92528	1.1409	3.96885	3.86915	3.7415	5.21716	2.6691	2.39156	4.80356	3.44228	2.84604	5.11977	3.28392	4.67205	5.05035	5.03805	4.97893
Myanmar	1	1.0936	1.14072	0.965507	1.82884	2.27009	2.42439	2.3945	1.71147	2.78372	3.03868	3.40929	3.80994	3.30389	N/A	N/A	1.53921	1.80142	2.95024	2.76048	2.83281
Namibia	1	1.20359	1.14921	0.912035	1.16305	1.13622	2.17905	1.32851	1.39383	1.15545	1.41968	1.19091	1.24126	1.6059	1.29875	1.28396	1.37244	1.39382	1.66307	1.67097	1.48193
Nauru	N/A	1	1.36953	1.78509	1.24409	N/A	0.607387	N/A	0.688309	N/A	N/A	0.92463	1.45362	0.781842	1.26982	0.251454	0.895406	0.134002	0.142471	0.990251	0.0680075
Nepal	1	0.835988	1.00969	0.940633	0.811468	0.814557	1.58928	1.4554	0.771314	1.16239	1.03331	0.960451	2.30016	1.20659	1.13684	0.877058	0.735002	0.797034	0.925267	0.86728	0.943736
Netherlands	1	1.01787	1.08021	1.22368	1.36834	1.41297	2.6364	2.62189	2.59204	2.5985	2.21529	2.61347	2.66	2.71959	2.52445	2.68464	2.72823	2.71587	2.68909	2.70266	2.71077
New Caledonia	N/A	N/A	N/A	N/A	N/A	N/A	N/A	N/A	N/A	N/A	N/A	N/A	N/A	N/A	N/A	N/A	N/A	N/A	N/A	N/A	N/A
New Zealand	1	1.21507	1.20515	1.01246	1.2476	1.23791	1.55518	1.60507	1.56911	1.64686	1.63229	1.65841	1.73067	1.71022	1.60749	1.48046	1.38055	1.43157	1.26066	1.2664	1.35258
Nicaragua	1	0.998675	0.775669	0.730034	0.896974	1.10002	1.30699	1.19414	1.29979	1.60322	1.36386	1.16451	1.05224	1.06756	0.976224	1.62784	1.48887	1.73711	1.99238	1.9889	1.96831
Niger	1	1.00886	0.956753	0.758175	0.768079	0.933312	1.16326	1.06835	1.12386	1.11715	1.08017	0.919855	0.818705	1.13244	1.14198	1.16421	1.12986	1.05438	1.19717	1.0326	0.926517
Nigeria	1	0.869395	1.22457	0.688778	0.987529	1.77376	2.38714	1.80799	1.52382	1.61183	1.55065	2.24257	1.4984	1.85498	1.36021	1.76045	2.36962	3.61861	1.89033	2.12592	2.20723
Norway	1	1.07799	1.13069	0.903003	1.15487	1.10129	1.62971	1.34085	1.48766	1.5495	1.51269	1.60269	1.75689	1.93214	1.67817	1.72838	2.16137	2.42615	2.89635	2.88101	2.97268
Oman	1	0.94612	1.05162	1.04143	1.41262	3.97968	4.34904	4.7475	4.53927	5.08017	5.24056	5.20166	5.02428	4.79423	5.00788	5.784	5.36175	4.85674	4.90487	5.49036	5.54061
Pakistan	1	1.14002	1.08106	1.08933	1.01137	1.19971	2.08054	2.9059	2.15531	1.50345	1.39092	1.23019	1.63988	1.27789	0.985728	1.32309	2.52489	1.70347	2.04625	1.31924	1.36398
Palau	1	N/A	N/A	0.6866	N/A	0.723793	3.03594	3.43125	3.67427	2.01876	4.92157	5.29321	5.10657	4.57081	4.64773	5.8465	5.14907	13.8573	12.4809	14.1031	13.9468
Panama	1	0.900915	1.00913	0.893166	0.817468	0.813906	1.66508	1.48612	1.79717	1.40359	1.7213	1.7223	1.70501	1.59213	1.58976	1.48712	1.33097	1.49947	1.10408	1.06561	1.07455
Papua New Guinea	1	1.14416	1.18765	0.781795	1.30804	1.33238	1.48767	1.46892	2.12884	1.90574	2.04235	2.11623	2.3139	2.29487	2.25633	1.37704	0.785482	1.11931	1.28888	1.40028	1.59196
Paraguay	1	1.36788	1.30648	1.00684	1.27771	1.07892	1.31588	1.6294	1.52232	1.56635	1.7085	1.77806	1.87761	1.66533	1.6242	1.62933	1.57315	1.58806	1.72554	1.5473	1.53745
Peru	1	1.11033	1.23464	1.00344	1.52244	1.5457	2.41032	2.55646	2.09326	2.94571	3.3847	3.80555	3.35302	3.29997	2.65653	3.2775	3.0743	3.02019	2.87117	2.82607	2.94887
Philippines	1	0.994884	1.18451	1.00157	1.26568	1.20193	1.61413	1.69962	1.12396	1.44006	1.39296	1.42349	1.27929	1.01583	0.827706	1.08899	1.05088	0.998746	0.996289	1.10742	1.11082
Poland	1	0.757723	0.639606	0.362179	0.674024	0.682596	2.18957	2.59264	2.53864	2.57991	2.52564	2.65327	2.88261	2.67912	2.83543	3.14287	3.22412	3.60596	4.05467	4.15512	4.305
Portugal	1	1.08995	1.0734	0.624581	0.973908	0.707239	1.39814	1.46265	1.57881	1.55486	1.38372	1.63633	1.62366	1.61684	1.45155	1.57609	1.95589	2.0626	2.11847	2.14041	2.223
Puerto Rico	1	1.11234	1.22716	1.01387	1.11008	1.0652	1.11679	0.9869	0.917313	1.01623	1.03618	1.08996	N/A	N/A	0.947294	N/A	N/A	0.759518	0.529442	0.525481	0.440452
Qatar	1	0.768435	0.899059	1.08098	1.39637	1.84736	2.78269	2.13623	2.10714	1.46237	1.52816	1.60571	1.64057	1.65862	2.35123	1.73445	1.65475	1.74184	2.03173	1.75476	1.64386
South Korea	1	0.940426	1.13809	2.29482	1.59872	1.12324	1.21916	0.968457	1.14458	1.11085	0.996342	0.96575	1.12608	1.2303	1.70786	1.51748	1.50185	1.69726	1.43562	1.64462	1.60499
Moldova	1	0.929282	0.895128	0.816547	0.973912	0.814675	1.19764	1.42471	1.41477	1.29648	1.33303	1.1517	1.16656	0.984284	1.03229	1.25271	1.1803	1.22852	1.31152	1.36081	1.38801
Romania	1	0.794373	0.81647	0.652815	0.95319	1.4973	2.42312	2.57554	2.58011	2.46145	2.15398	2.10684	2.11222	2.06514	2.17836	1.88329	2.0691	2.29171	2.7019	2.9056	3.06594
Russia	1	0.891913	0.800282	2.79364	1.81841	5.98841	6.48622	7.27675	5.40666	6.48293	6.71938	6.78973	7.2549	6.92872	N/A	5.5553	6.03686	4.88998	5.43337	6.00366	7.3062
Rwanda	1	1.11921	1.211	0.834063	1.24103	1.18015	2.09299	1.76129	2.12609	2.09467	1.9812	2.34857	4.51312	4.5022	2.79071	4.78034	5.23153	6.25354	4.72653	4.70713	3.93237
St. Kitts and Nevis	1	0.964597	0.837425	0.948844	0.806423	0.579533	1.84999	1.26171	1.01869	0.785601	0.623637	0.388435	0.275482	0.0889379	0.282334	0.105528	N/A	0.209691	0.941857	0.379671	0.228443
St. Lucia	1	0.923727	0.753957	0.508763	0.775147	0.648462	0.915648	1.17534	0.546182	1.39944	0.471059	0.429939	0.247829	0.42507	0.458574	0.457231	0.379524	0.183347	0.161279	0.23761	0.244968
Samoa	1	1.08406	1.44228	1.13492	1.16923	1.44932	1.01884	1.26689	0.685631	1.01851	1.00501	0.427141	N/A	N/A	0.387208	0.439746	0.700452	0.592168	0.78851	0.824329	0.755487
San Marino	N/A	N/A	N/A	N/A	N/A	N/A	N/A	N/A	N/A	N/A	N/A	N/A	N/A	N/A	N/A	N/A	N/A	N/A	N/A	N/A	N/A
Sao Tome and Principe	1	1.16849	1.39691	1.71114	1.99198	1.81757	2.87651	2.56775	2.45417	1.5256	1.54826	1.31224	1.59261	1.28093	N/A	2.26527	1.9382	2.14324	1.93622	1.88122	1.88123
Saudi Arabia	1	1.04754	1.08135	0.380106	1.16356	1.20955	1.7217	2.18291	2.0776	2.08116	2.30423	2.24478	2.33218	2.22779	1.38106	1.88266	1.51728	1.49036	2.14045	2.0555	2.22381
Senegal	1	0.949767	0.932841	0.910479	0.981787	0.905241	1.29266	1.25996	0.918829	0.947809	0.863059	0.77953	0.745601	0.782331	0.870212	0.907236	1.11245	1.14505	1.4942	1.25776	1.22426
Serbia	1	1.92709	2.04192	1.79846	1.05303	1.24349	5.95326	6.74457	5.63887	6.32573	7.10695	6.81235	6.7867	5.95932	5.42131	7.28896	7.60191	7.53951	8.11151	8.90467	9.23512
Seychelles	1	1.68352	1.77376	1.7618	1.3979	1.37556	3.13446	2.1678	1.87021	1.90325	1.32559	1.54274	1.62541	1.56158	1.20496	1.59936	1.33254	1.1356	1.60577	1.09313	1.04233
Sierra Leone	1	0.744071	0.599826	0.694773	0.667911	0.654967	0.610932	0.658058	0.95771	1.33849	1.03082	1.03857	1.1775	1.02616	1.25035	2.14427	2.05243	2.68142	3.71671	3.90353	3.81787
Singapore	1	0.0799562	0.7336	0.422809	0.115748	0.17601	0.178645	0.0764413	1.80765	0.513727	0.695866	0.629965	0.835739	0.914	1.45239	0.240362	0.262216	0.0881691	0.594388	0.330973	0.478622
Sint Maarten	N/A	N/A	N/A	N/A	N/A	N/A	N/A	N/A	N/A	N/A	N/A	N/A	N/A	N/A	N/A	N/A	N/A	N/A	N/A	N/A	N/A
Slovakia	1	0.350868	0.311203	0.386849	0.269866	0.509932	1.02578	1.04995	0.667763	1.28656	1.50519	1.60686	1.47357	1.54519	1.74107	1.88331	1.98342	2.11159	2.21853	2.24433	2.34678
Slovenia	1	0.912634	1.2747	0.922888	1.20873	0.636235	2.22043	2.3477	2.20932	2.30039	2.52309	2.67143	2.88444	2.85661	2.18268	2.53335	2.95109	3.04494	3.3274	3.6178	3.70206
Solomon Islands	1	1.03782	1.02475	1.06694	1.08836	1.06429	1.15706	1.15012	2.79669	2.3307	1.01899	2.47497	1.7063	2.95214	3.02017	1.96457	1.23902	2.07743	2.03198	1.95709	1.88061
Somalia	1	0.996457	0.972649	0.567096	6.64339	12.4469	1.69267	2.80114	1.45802	7.82297	11.8519	9.02951	6.85087	6.76187	10.7527	13.9339	13.2746	13.3737	20.4762	8.17058	7.36062
South Africa	1	0.99448	1.01977	1.09614	0.929253	0.857259	1.76786	1.87626	1.61082	1.72425	1.7924	1.81512	2.34278	3.08964	2.52448	2.74933	3.29582	2.91072	3.26619	3.41174	3.67238
South Sudan	N/A	N/A	N/A	N/A	N/A	N/A	N/A	N/A	N/A	N/A	N/A	N/A	N/A	N/A	N/A	N/A	N/A	N/A	N/A	N/A	N/A
Spain	1	1.05987	1.33615	1.22102	1.43542	1.45753	1.9404	1.97117	2.03413	1.91487	1.99227	2.01731	2.16861	2.10518	1.86381	2.22709	2.38966	2.56534	2.73102	2.86101	2.85752
Sri Lanka	1	1.23097	1.3279	1.04403	1.40017	1.40085	1.40203	1.67956	1.78889	1.80966	1.73935	1.79598	1.69179	1.59394	1.30381	1.37837	1.25783	1.36278	1.01591	1.02667	1.00804
St. Vincent and the Grenadines	1	0.988294	0.775295	0.576039	1.03281	1.4421	1.24353	2.41283	2.54891	1.75478	0.987362	0.996037	0.81013	0.535424	0.665173	0.390232	0.358675	0.258399	0.149676	0.145357	0.120349
Palestine	1	0.689288	0.722643	0.968432	0.705002	2.69733	1.99169	1.69231	1.3877	1.32142	1.16843	1.02409	1.53999	1.76193	2.01313	1.94298	2.15917	2.38134	3.33523	3.15681	3.81971
Sudan	1	1.16688	1.08392	0.832711	4.59915	5.39573	2.60543	5.49456	4.65813	6.03367	5.65975	5.52848	6.13288	6.7695	4.19146	6.31653	6.08098	N/A	N/A	N/A	N/A
Suriname	1	1.64148	1.8415	1.66335	1.60567	1.02283	1.66677	1.5056	0.896053	1.06865	1.58784	2.0083	1.91969	1.99469	2.18121	2.0994	1.84991	2.08084	1.66822	1.68722	1.64428
Swaziland	N/A	1	1.04337	0.90325	1.00836	0.982993	1.10089	1.18423	1.22923	1.12524	0.934398	0.761729	0.685709	0.746234	0.817292	0.644642	0.604485	0.768031	0.847105	1.01266	0.966942
Sweden	1	0.968242	1.13008	0.62299	1.14325	0.686749	2.26749	2.44632	2.38658	2.44917	2.61339	2.46644	2.35689	2.34551	2.35861	2.21207	2.09306	2.09363	1.96135	2.0333	2.06351
Switzerland	1	0.975049	0.95208	0.804705	1.08405	1.07443	1.68109	1.58199	1.56566	1.57985	1.61602	1.68312	1.75956	1.78833	1.6277	1.77598	1.80312	1.78996	1.99962	1.84738	1.88229
Syria	1	1.29318	1.31115	1.14734	0.9685	1.05995	1.41113	2.01845	1.9332	2.3124	1.83272	1.82979	1.92139	1.72247	1.37489	1.4869	1.26546	1.42687	1.53509	1.42745	1.48653
Macedonia	1	0.855114	1.11442	1.14923	1.24218	1.15078	2.19773	1.91003	2.12809	2.10294	2.02709	2.22973	2.6218	2.08838	1.60833	1.64963	1.95887	1.90484	1.64529	1.81192	1.87253
Tajikistan	N/A	1	1.10411	0.685716	0.950799	1.21233	1.25893	1.06026	1.06719	0.851239	0.755783	0.998167	0.814166	0.659563	0.0974416	0.385125	0.188548	0.314009	N/A	0.14598	0.222576
Thailand	1	0.983125	1.10507	1.1121	1.07329	1.0909	1.29667	1.27208	1.24843	1.38298	1.32757	1.33373	1.29334	1.3336	1.31353	1.42652	1.36634	1.48699	1.56055	1.59557	1.65837
Timor-Leste	1	0.556223	0.505887	0.426651	1.03834	0.828827	N/A	1.07135	2.09429	5.6207	5.04524	7.84746	7.64959	6.11007	7.13763	7.49722	5.51092	8.17274	7.93361	7.46764	7.86069
Togo	1	1.12881	1.04406	1.24503	1.15758	1.10347	1.6991	N/A	1.6673	1.47	1.3953	1.24545	1.33651	1.33174	1.30431	1.5399	1.50619	1.98073	1.81072	1.87178	1.83072
Tonga	1	1.05368	1.14909	1.63954	1.07844	1.93803	0.755516	2.33924	2.29311	2.46959	2.88116	2.3341	1.55796	0.0659125	1.08036	0.608936	2.44976	2.05148	2.33123	1.85418	2.48059
Trinidad and Tobago	1	1.42064	1.52544	0.825204	1.01882	1.23971	1.28449	1.0789	1.1007	0.932231	1.38765	1.72284	0.500669	0.566298	0.47361	0.932826	1.01438	0.979881	0.407878	0.401891	0.359416
Tunisia	1	1.11825	1.13878	1.28038	1.11244	1.13376	2.38674	2.2495	2.13014	1.45779	1.4108	1.27575	1.29654	1.54008	1.50024	1.74983	2.22974	1.76055	2.82705	2.41479	2.40595
Turkey	1	1.16265	1.25559	1.25867	1.06937	0.856197	1.83527	1.56542	1.48338	1.39625	1.49021	1.51961	1.36756	1.44898	1.51231	1.51392	1.63254	1.92394	1.88432	2.06168	1.94519
Turkmenistan	1	1.00654	0.459878	0.508524	N/A	N/A	0.814334	0.831886	0.759401	0.708388	0.853246	1.06192	0.744682	0.825156	0.947006	1.08228	1.06429	1.08538	1.11958	1.03263	1.12227
Turks and Caicos Islands	1	N/A	N/A	1.15591	1.26502	1.4542	1.41123	1.42645	1.21487	1.15812	0.940198	0.861934	0.763886	0.881519	1.04689	1.24734	0.125167	0.0659064	0.413453	0.0841847	0.0918933
Tuvalu	N/A	N/A	N/A	N/A	N/A	N/A	N/A	N/A	N/A	N/A	N/A	N/A	N/A	N/A	N/A	N/A	N/A	N/A	N/A	N/A	N/A
Tanzania	1	0.854992	0.721649	0.562466	0.613595	0.690498	1.3325	1.38194	1.8016	1.46229	1.49561	1.36994	1.92669	1.6511	1.65601	2.06884	1.87615	1.92826	1.81863	2.30856	2.35625
Uganda	1	1.28549	1.20678	0.988006	1.0641	0.939297	1.6252	1.49921	1.53976	1.69564	1.54893	1.32123	2.204	2.01834	2.11595	2.34097	2.62295	3.01133	3.25532	2.94888	2.98809
Ukraine	1	1.0801	0.968477	0.858052	1.35119	1.17091	1.48888	1.55674	1.56124	1.80066	1.75791	1.71704	1.6414	1.83146	1.56974	1.74174	1.72627	1.74217	1.7036	1.7358	1.78825
United Arab Emirates	1	1.17441	1.25429	1.05797	1.44572	1.29092	1.6963	1.73277	1.82114	1.49217	1.68488	1.47615	1.71974	1.62151	1.33886	1.32136	1.36072	1.28415	1.46796	1.23347	1.22856
United Kingdom	1	1.00996	1.00335	1.18394	0.937294	1.07471	2.06321	2.07643	2.13388	2.26446	2.38538	2.49563	2.34335	2.11074	2.00199	2.31876	2.41948	2.28162	2.30062	2.28497	2.41186
United States	1	0.986204	1.05301	1.09908	0.782517	0.856916	1.52776	1.19485	1.52813	1.30529	1.33833	1.32554	1.59008	1.83345	1.6852	1.8227	1.94208	2.03237	2.02091	2.15021	2.1455
Uruguay	1	1.71553	1.7614	1.02181	1.59259	1.32655	2.00702	2.00861	2.36621	2.67358	2.71554	2.76789	2.72042	2.71123	2.50143	2.76823	2.61671	2.62417	2.44184	2.69799	2.69063
Uzbekistan	1	1.00956	0.86504	0.839616	0.696184	0.791952	1.19154	1.15454	1.39653	1.59383	1.32279	1.25933	1.2871	1.21473	1.07727	1.39668	1.41125	1.04639	1.09692	0.983118	1.11173
Vanuatu	1	1.08488	1.19474	0.936474	0.843369	0.887324	1.27573	1.00938	1.75232	0.79179	2.01762	3.20817	0.894497	1.70942	1.28044	0.790534	2.05528	2.43084	2.46348	2.10081	2.16978
Venezuela	1	1.33584	1.13752	0.579211	0.742111	0.644534	0.65492	1.19063	0.930454	1.1809	1.15596	1.07656	0.741888	0.623132	0.15707	0.614203	0.595768	0.475566	0.335697	0.459613	0.461031
Vietnam	1	1.36986	1.51758	1.33507	1.74579	1.78042	2.2299	2.21304	2.18687	2.45782	2.4716	2.33948	2.51021	2.19745	1.83928	2.25741	2.10848	2.3207	2.44183	2.50894	2.57951
Yemen	1	1.39017	1.27061	0.9169	3.36878	3.3027	2.18765	1.99941	1.49658	1.81612	2.06581	2.08414	2.01683	2.1036	1.38805	2.22546	2.42494	2.41609	2.39736	1.67408	1.4753
Zambia	1	0.989202	1.21468	0.570179	0.713813	0.835994	1.65644	1.03307	1.22781	1.21753	1.06829	0.986134	1.17702	1.04168	1.14038	1.32546	1.71021	2.32416	1.81952	2.67892	2.53664
Zanzibar	1	1.07006	1.22878	0.463664	1.08689	0.475583	2.00972	1.973	1.45448	1.87955	1.77764	1.55359	1.24205	1.96235	1.00435	2.04415	1.17874	2.31502	2.30105	2.40477	1.5055
Zimbabwe	1	1.23554	1.19402	1.35836	1.41261	1.64534	2.01688	1.46255	1.0031	1.21131	0.822169	0.585484	0.594408	0.697068	0.38733	0.749589	0.656901	0.761767	0.502461	0.504014	0.478633
Taiwan	1	1.02546	1.04726	0.864356	1.08216	0.55434	1.11325	1.07389	1.19372	1.14391	1.15278	1.18194	0.678279	1.15956	1.17652	1.18643	N/A	1.19001	1.2059	1.2487	0.830243
World	1	1.06399	1.08837	1.1458	1.21585	1.46391	1.88973	1.8866	1.73957	1.88026	1.89807	1.93907	2.03698	2.06301	1.46391	1.9545	1.96439	1.95037	2.02653	2.12579	2.20004

## Sheet: land_exports_of_global
Country Name	1995	1996	1997	1998	1999	2000	2001	2002	2003	2004	2005	2006	2007	2008	2009	2010	2011	2012	2013	2014	2015
Afghanistan	N/A	0.00400623	0.00402491	0.00422888	0.00398259	N/A	N/A	0.00346637	0.00375951	0.00216829	0.0017945	0.00181293	0.00135724	0.00100879	0.000908015	0.000256374	0.000636335	0.000167236	0.000292748	0.000297356	0.000191739
Albania	9.96956e-05	8.95971e-05	8.40868e-05	6.11333e-05	0.000113411	0.000125005	0.000204886	0.000135429	0.000117175	0.000110252	0.000115172	0.000173357	0.000183743	0.000178882	0.000293175	0.000198543	0.000180858	0.000161023	0.00015498	0.000151346	0.000149751
Algeria	0.0030935	0.00234068	0.00253697	0.0022445	0.002088	0.00232225	0.00218845	0.00219176	0.00171265	0.00167827	0.00186451	0.00191472	0.00265538	0.00212386	0.00184865	0.0022196	0.00319112	0.00276029	0.00157068	0.00126932	0.00132873
Andorra	4.61269e-06	3.27776e-06	2.53366e-06	6.23767e-07	4.43629e-07	3.4564e-07	1.77214e-06	1.81851e-06	1.15968e-06	1.5611e-06	1.16954e-06	1.37904e-06	2.13599e-06	1.96961e-06	7.47529e-07	1.11614e-06	8.5678e-07	1.05186e-06	8.53725e-07	7.21934e-07	7.21209e-07
Angola	0.012927	0.0254359	0.0165292	0.0153752	0.0172888	0.00973722	0.0318482	0.0297683	0.008434	0.0142068	0.0103022	0.0106542	0.00918153	0.00870076	0.0089517	0.00910846	0.00898107	0.015035	0.0100941	0.0108951	0.0135209
Anguilla	1.56229e-07	1.47992e-07	1.48343e-07	1.5e-07	1.09995e-07	9.18221e-08	8.44972e-08	8.02951e-08	8.80647e-08	N/A	7.77256e-08	5.44902e-08	4.99276e-08	4.5339e-08	8.57174e-08	6.24248e-08	7.12639e-08	1.14938e-08	5.85325e-09	3.83166e-09	3.02168e-09
Antigua and Barbuda	3.26981e-06	5.8799e-06	5.83088e-06	1.66788e-06	2.87082e-06	3.4851e-06	6.20529e-06	4.39336e-06	4.54366e-06	2.02826e-06	1.95104e-06	1.04289e-06	8.73415e-07	8.96823e-07	2.79607e-06	1.18127e-06	1.63131e-06	1.16792e-06	1.09481e-06	3.03757e-06	6.91727e-07
Argentina	0.0246455	0.0235168	0.0238959	0.0205615	0.019495	0.016894	0.0159682	0.0302542	0.0304149	0.0347808	0.0336075	0.0311272	0.0293826	0.0297848	0.0374487	0.0287905	0.0287349	0.0280915	0.0288839	0.028471	0.0274923
Armenia	7.58017e-05	9.49727e-05	7.80747e-05	9.39117e-05	7.10071e-05	6.12306e-05	5.81478e-05	0.000135559	0.000110565	8.17686e-05	0.000113193	9.06392e-05	5.48967e-05	6.39138e-05	4.19135e-05	6.77667e-05	6.66418e-05	7.27062e-05	9.20622e-05	0.000108938	0.000120839
Aruba	1.01104e-08	3.69051e-08	1.51051e-08	4.84658e-08	5.44091e-08	5.68352e-09	8.74115e-09	8.43613e-09	5.78059e-09	5.85894e-09	1.06759e-08	5.89499e-09	6.05092e-09	2.38279e-09	3.95748e-09	8.41921e-09	7.45104e-09	4.07376e-09	3.8283e-09	1.44248e-09	1.33057e-09
Australia	0.147528	0.143797	0.136197	0.126017	0.120146	0.117418	0.0975547	0.0946988	0.0844945	0.0865437	0.0924618	0.0926072	0.0917312	0.107159	0.123411	0.122329	0.124494	0.117114	0.122403	0.13183	0.135814
Austria	0.000964874	0.000787922	0.000875641	0.00154759	0.00107725	0.00136384	0.00156271	0.00161496	0.00172984	0.00154347	0.00163644	0.00165647	0.00176322	0.00173474	0.00219055	0.00191467	0.00198678	0.00191911	0.00184114	0.00173734	0.00167846
Azerbaijan	0.000543347	0.000377409	0.000586266	0.000482395	0.000535196	0.000661743	0.000888609	0.000478176	0.000443691	0.000642638	0.000864478	0.000862093	0.000832304	0.000771357	0.000516246	0.000648482	0.000650444	0.000589938	0.000516827	0.000416954	0.000434391
Bahamas	0.000119569	6.61606e-05	5.57288e-05	8.27365e-05	6.05608e-05	4.6038e-05	7.25434e-05	0.000100206	6.75111e-05	2.70048e-05	1.41121e-05	2.23092e-05	2.27394e-05	3.17628e-05	1.79804e-05	8.68448e-06	1.79015e-05	6.88561e-06	9.87855e-06	1.94548e-06	1.83726e-06
Bahrain	3.18981e-06	2.05703e-06	1.92374e-06	2.49709e-06	2.39679e-06	1.93733e-06	1.90165e-06	4.02911e-06	5.93535e-06	3.58688e-06	4.22455e-06	3.39545e-06	3.9098e-06	3.44135e-06	6.03465e-06	3.73418e-06	3.33319e-06	3.57165e-06	3.75352e-06	3.2365e-06	2.43548e-06
Bangladesh	0.000808773	0.000819301	0.000875759	0.000608618	0.000882691	0.000732255	0.00107555	0.00107709	0.000932283	0.000957991	0.00100305	0.00093762	0.00075547	0.000744035	0.000985647	0.000817644	0.00102897	0.00116864	0.00108857	0.00100404	0.000992682
Barbados	6.98741e-06	4.45998e-06	3.84035e-06	2.73848e-06	3.94142e-06	2.21388e-06	3.4662e-06	4.16706e-06	4.14378e-06	3.10809e-06	1.58498e-06	1.78437e-06	1.16176e-06	1.1103e-06	2.29465e-06	1.27394e-06	1.21843e-06	1.11077e-06	8.85541e-07	7.43412e-07	4.17313e-07
Belarus	0.00471629	0.00422615	0.00515129	0.00411078	0.00487207	0.00404648	0.00465825	0.00432107	0.0048723	0.0047881	0.00503678	0.00455921	0.00466931	0.00442224	0.00348953	0.00399029	0.00446039	0.00466739	0.00386839	0.00371099	0.00363958
Belgium	0.000847121	0.000806958	0.000827208	0.000621662	0.000767415	0.00079944	0.000990563	0.000986111	0.000920132	0.000937264	0.000967835	0.000959809	0.000896969	0.000928292	0.00120425	0.000940831	0.000980008	0.000943297	0.00092701	0.000895359	0.00087708
Belize	0.000671045	0.000702736	0.000465286	0.000575367	0.000287429	0.000312242	0.000311112	0.000352548	0.000343302	0.000404821	0.000221101	0.000287621	0.000287668	0.000307508	0.000380347	0.000432875	0.000353277	0.000439573	0.000430641	0.000421387	0.00040991
Benin	0.000928941	0.000993075	0.00101946	0.000721608	0.000896259	0.000558785	0.000638586	0.000695419	0.000675512	0.000546233	0.000532464	0.000456213	0.000694507	0.000718929	0.000877084	0.000915242	0.00071237	0.00104258	0.00116645	0.00119491	0.00115987
Bermuda	1.09573e-07	1.50917e-08	1.38756e-08	9.25138e-08	1.29383e-08	6.43698e-09	6.7387e-09	4.33859e-10	1.11541e-08	5.32707e-09	N/A	4.74442e-10	8.37498e-10	2.31278e-09	2.81094e-09	N/A	N/A	6.41529e-10	1.43819e-10	2.10646e-10	2.36948e-10
Bhutan	0.000619916	0.000539866	0.000528398	0.000464337	0.000773768	0.00031052	0.000239487	0.000226771	0.000326892	0.000209715	0.000339201	0.000828131	0.000882692	0.000828704	0.000938886	0.000461129	0.000378082	0.000393057	0.000309354	0.000155405	0.000264595
Bolivia	0.0144641	0.0130862	0.0112545	0.00671461	0.00925903	0.00774634	0.00661125	0.00802247	0.0104328	0.0108831	0.011806	0.0144329	0.0129556	0.014184	0.0145622	0.0147126	0.0136431	0.0159338	0.0161672	0.0146252	0.0113822
Bosnia and Herzegovina	0.0003962	0.000561535	0.00059262	0.000380827	0.00058771	0.000618074	0.000552269	0.000387053	0.000828564	0.000659054	0.000883141	0.000952971	0.000775256	0.000706104	0.00112841	0.000622993	0.000492027	0.000482916	0.000461738	0.000450493	0.000444401
Botswana	0.00907447	0.0124265	0.012681	0.00718749	0.0132322	0.0119031	0.00915102	0.00897848	0.00842428	0.00843908	0.0105363	0.00890898	0.00589727	0.00746063	0.00573848	0.00635406	0.00488128	0.00735538	0.00801085	0.00719358	0.00272375
Brazil	0.0138849	0.0143916	0.0152891	0.0142261	0.0169882	0.0129801	0.0240592	0.0217463	0.0246822	0.028625	0.0275107	0.0283517	0.0259489	0.0275618	0.03551	0.0297173	0.0254713	0.0321923	0.0532216	0.0558427	0.0578474
British Virgin Islands	4.73732e-06	4.68922e-06	N/A	N/A	N/A	2.34329e-06	2.36848e-06	2.57224e-06	2.86696e-06	2.50145e-06	1.24835e-06	1.15884e-06	9.73506e-07	1.01718e-06	2.1624e-06	1.16645e-06	8.45227e-07	1.36567e-06	1.33331e-06	1.17576e-06	1.2824e-06
Brunei Darussalam	0.000100742	7.61569e-05	6.30046e-05	5.2184e-05	6.09943e-05	3.74746e-05	4.02173e-05	4.61332e-05	2.18413e-05	1.55993e-05	1.23595e-05	1.17959e-05	1.95166e-05	1.73715e-05	2.8552e-05	2.40352e-05	4.77442e-05	5.1308e-05	3.35746e-05	6.08559e-05	4.59283e-05
Bulgaria	0.00258557	0.00298292	0.00271765	0.00218267	0.00181895	0.0013766	0.00197753	0.00164862	0.00187754	0.00203386	0.00185655	0.00170708	0.00172864	0.00185986	0.00209333	0.0020968	0.00221708	0.00222443	0.0022722	0.00212433	0.00210801
Burkina Faso	0.000979345	0.000684046	0.000715131	0.00104677	0.000611844	0.000472914	0.00149869	0.00106348	0.000675152	0.000854065	0.000574989	0.000573974	0.000588978	0.000688592	0.00105208	0.00113126	0.00157599	0.00167084	0.00178646	0.00196922	0.00175945
Burundi	0.000139365	5.56794e-05	0.000109699	7.82768e-05	7.44018e-05	6.05188e-05	4.91601e-05	9.19227e-05	5.04063e-05	9.37526e-05	3.99308e-05	6.48328e-05	3.64796e-05	6.41053e-05	5.03711e-05	7.63607e-05	6.14098e-05	6.19211e-05	6.62366e-05	6.50668e-05	6.82203e-05
Cabo Verde	1.01694e-05	8.76162e-06	1.19838e-05	1.15351e-05	1.09339e-05	8.34306e-06	1.40487e-05	1.01626e-05	7.90118e-06	4.90906e-06	3.24845e-06	3.3834e-06	4.36271e-06	4.0122e-06	3.87122e-06	3.13602e-06	3.34075e-06	3.84315e-06	6.50249e-06	5.55417e-06	6.10301e-06
Cambodia	0.00250386	0.00194136	0.00289689	0.00217693	0.00337872	0.0028281	0.00248213	0.00262242	0.0028013	0.00294627	0.0027283	0.00286578	0.00293562	0.00278845	0.0022624	0.00176319	0.00144349	0.00178605	0.00238921	0.00218375	0.0021708
Cameroon	0.00537853	0.00622425	0.00727473	0.00397515	0.0124817	0.0102036	0.00848012	0.0079842	0.00811597	0.00780684	0.00811199	0.0081326	0.00759486	0.00740716	0.00959103	0.00621523	0.00516326	0.00584523	0.00629145	0.00580612	0.00574438
Canada	0.0706648	0.0680119	0.0693196	0.0590195	0.0660116	0.0471055	0.0501161	0.0436734	0.0394864	0.0416296	0.0415073	0.03821	0.0408093	0.0399087	0.0484271	0.042631	0.0416956	0.0423334	0.0439258	0.0439674	0.0436484
Cayman Islands	1.78743e-06	7.02284e-06	3.86041e-06	5.96304e-06	2.53269e-06	1.99552e-06	2.38217e-06	1.88617e-06	2.39086e-06	5.36144e-07	6.14103e-07	N/A	8.24848e-07	5.63941e-07	2.49933e-06	5.21417e-07	4.02067e-07	3.51305e-07	3.16999e-07	3.56554e-07	3.22839e-07
Central African Republic	0.00168091	0.00173759	0.00221041	0.00180775	0.00188863	0.00400198	0.00297003	0.00295949	0.00377342	0.00311642	0.00317098	0.00329248	0.0064242	0.00529856	0.0101777	0.00481208	0.00377251	0.00496682	0.0065986	0.00614918	0.00596414
Chad	N/A	N/A	N/A	N/A	N/A	N/A	N/A	N/A	N/A	0.00585114	0.00491104	0.00450347	0.00535033	0.0052007	0.00810231	0.00572254	0.00736705	0.00518321	0.00327868	0.00409593	0.0048292
Chile	0.00624731	0.00536205	0.00493158	0.00322336	0.00503905	0.0028737	0.00537377	0.00545227	0.0059541	0.00559563	0.00553485	0.00514806	0.00506484	0.00511316	0.00740322	0.00398045	0.00379229	0.00362835	0.00352089	0.00372368	0.00352031
China	0.0461532	0.0441468	0.0561564	0.10418	0.0540692	0.0800506	0.0375795	0.0377836	0.0522063	0.0489709	0.0564464	0.0632388	0.0669342	0.0576383	0.0660881	0.0494567	0.0470123	0.0506206	0.0477149	0.0476519	0.0473768
Hong Kong	9.58597e-06	1.97493e-06	1.72578e-06	8.16362e-06	3.9935e-06	2.57096e-06	1.82929e-06	2.72307e-06	5.83112e-06	3.51162e-06	4.29999e-06	5.09733e-06	5.70456e-06	2.84863e-06	6.30668e-06	3.80178e-06	3.91211e-06	4.65269e-06	3.68325e-06	2.99926e-06	2.97287e-06
Macao	7.40785e-07	4.34174e-07	4.33434e-07	6.77253e-07	4.17218e-07	3.56827e-07	3.43162e-07	3.66235e-07	3.38351e-07	3.82989e-07	3.85456e-08	2.06028e-08	9.80632e-10	1.74568e-08	4.2475e-07	3.21475e-07	2.09899e-08	2.34125e-08	1.67818e-08	2.81179e-08	4.82342e-08
Colombia	0.00657575	0.00576032	0.00594037	0.00502104	0.00574144	0.0045402	0.00495306	0.00475313	0.00491946	0.00642962	0.0060722	0.00648329	0.00604144	0.00719456	0.00748535	0.00484442	0.00440188	0.00808695	0.00753869	0.00596102	0.00571951
Comoros	1.94625e-05	1.83684e-05	1.82891e-05	1.11717e-05	1.22023e-05	1.27144e-05	N/A	1.29605e-05	1.3967e-05	1.13028e-05	7.55887e-06	9.08017e-06	7.27808e-06	7.123e-06	9.38297e-06	1.01867e-05	7.89989e-06	6.89321e-06	N/A	N/A	N/A
Congo Republic	0.00335597	0.00380635	0.00455142	0.00325242	0.00644072	0.00537656	0.00439282	0.00440864	0.00439929	0.00452504	0.00479591	0.00485129	0.00475824	0.00476209	0.00659843	0.00517893	0.00313981	0.00509298	0.00337199	0.00307873	0.00317233
Cook Islands	5.47948e-06	5.47931e-06	5.59536e-06	5.01713e-06	5.84184e-06	5.6073e-06	4.88668e-06	N/A	4.22372e-06	N/A	N/A	N/A	N/A	N/A	N/A	N/A	N/A	4.62261e-06	N/A	3.95933e-06	3.98945e-06
Costa Rica	0.00119334	0.00203962	0.00213	0.00115133	0.0019676	0.00154274	0.00119355	0.00115955	0.00121682	0.00132308	0.0013864	0.001379	0.00136403	0.00129041	0.00192239	0.00129816	0.00119462	0.00127099	0.00115626	0.00108414	0.00106571
Croatia	0.000465071	0.000492678	0.00023566	0.000401017	0.000613409	0.000319204	0.00036562	0.000366532	0.00113027	0.000601307	0.000586368	0.000592759	0.000722167	0.000587064	0.00105795	0.000414374	0.000365801	0.000436597	0.000306632	0.000319234	0.000477294
Cuba	0.000884498	0.000860593	0.000808627	0.000886796	0.000750172	0.000418426	0.000876123	0.000716518	0.000626174	0.000475769	0.000506625	0.000361048	0.000384368	0.000321542	0.000639367	0.000463478	0.000412429	0.000424281	0.000447632	0.000503213	0.000434129
Curacao	N/A	N/A	N/A	N/A	N/A	N/A	N/A	N/A	N/A	N/A	2.43879e-06	2.53306e-06	2.20358e-06	2.13174e-06	4.0557e-06	1.79509e-06	4.91123e-06	5.6512e-06	1.97712e-06	1.32119e-06	1.30246e-06
Cyprus	5.6464e-05	5.81824e-05	6.20173e-05	5.73765e-05	5.51772e-05	3.9679e-05	0.000125877	0.000107411	0.000133525	0.000131448	0.00012888	0.000103158	9.54665e-05	8.94839e-05	0.000132459	0.000129503	0.000135773	0.000134817	0.000153563	0.000156652	0.000149582
Czech Republic	0.00147319	0.000969047	0.00105541	0.000946411	0.0011033	0.00120047	0.00119463	0.00113185	0.00131125	0.00132105	0.00155758	0.00152157	0.00152085	0.00146245	0.00208637	0.00170114	0.00167844	0.00178642	0.00173721	0.00167832	0.0016632
Cote d'Ivoire	0.00617485	0.00653068	0.00642605	0.00559356	0.00658838	0.00443983	0.00405987	0.00422708	0.00407581	0.00401404	0.0040833	0.00425946	0.00427642	0.00440509	0.00624695	0.00466114	0.00456815	0.00447309	0.00404435	0.00383593	0.00371079
North Korea	0.000179361	0.000198623	0.000263342	0.000132157	0.000147271	5.54244e-05	4.77292e-05	0.000133901	N/A	0.000118512	9.04503e-05	9.42103e-05	0.000153175	0.000216773	0.000110967	0.000128671	8.8419e-05	9.93069e-05	0.000114039	0.000261691	0.000272934
DR Congo	0.0219223	0.026893	0.0304955	0.01721	0.0392505	0.0258553	0.0335119	0.0320109	0.0339453	0.0334455	0.0321853	0.0301613	0.0341667	0.032507	0.0390578	0.038166	0.031765	0.0336378	0.0303955	0.0237123	0.0225732
Denmark	0.000676074	0.000654539	0.00053318	0.000459393	0.000459931	0.00042584	0.00110487	0.00107833	0.00115242	0.00102633	0.00107096	0.0010049	0.000951839	0.00099867	0.00125888	0.00111325	0.00115737	0.00115862	0.00113323	0.00108928	0.00104387
Djibouti	5.2167e-05	4.53765e-05	5.07335e-05	4.96963e-05	5.80613e-05	7.09969e-05	4.06309e-05	3.79906e-05	2.57349e-05	2.2667e-05	2.88798e-05	7.01882e-05	9.8904e-05	9.91832e-05	N/A	0.000102195	0.000107988	7.86965e-05	9.90111e-05	2.01107e-05	1.93756e-05
Dominica	1.64225e-05	1.90822e-05	1.8762e-05	1.84687e-05	N/A	5.82887e-06	2.48458e-05	1.18494e-05	1.42153e-05	1.41026e-05	1.40233e-05	1.18662e-05	8.36745e-06	4.17346e-06	9.37546e-06	4.15018e-06	5.63313e-06	4.45845e-06	6.61632e-06	5.44028e-06	3.23413e-06
Dominican Republic	0.000945694	0.000831621	0.000811402	0.000846671	0.000665745	0.000592385	0.000702088	0.00066571	0.000635693	0.00057174	0.000439616	0.000432275	0.000393384	0.000334599	0.000394733	0.000285586	0.000373297	0.000306317	0.000326195	0.000330392	0.000339364
Ecuador	0.00310108	0.00452367	0.003823	0.00251868	0.00537229	0.00384419	0.0031007	0.00267362	0.00291958	0.00366426	0.0035415	0.00379084	0.00377622	0.0045944	0.00297088	0.00375913	0.00442759	0.00472239	0.00464184	0.00450701	0.00447922
Egypt	0.00049758	0.00043789	0.000435832	0.00024122	0.000353237	0.000245364	0.000422641	0.000415493	0.000467018	0.000642732	0.000682276	0.000642849	0.000628041	0.000631409	0.000666154	0.000501363	0.000467998	0.000411615	0.00041625	0.000340308	0.000363195
El Salvador	0.000416034	0.000370543	0.000427527	0.000337569	0.000378205	0.000319497	0.000293066	0.00028225	0.000268274	0.000279047	0.000267626	0.000245657	0.00024034	0.000249917	0.00030859	0.000304996	0.000387779	0.00033717	0.00036957	0.000317821	0.000320457
Equatorial Guinea	0.000618468	0.00171827	0.0018092	0.00153877	0.00161347	0.00103113	0.00104297	0.00105177	0.00112132	0.00103836	0.00103574	0.000991214	0.000994756	0.000966228	0.00130221	0.000714434	N/A	0.000640685	0.00095693	0.000751787	0.000962763
Eritrea	0.000420091	0.000552474	0.000586549	0.000303668	0.000244643	0.000195259	0.000198637	0.000203466	0.000112044	0.000111753	0.000104274	0.00010228	9.70385e-05	0.000203888	0.00045867	0.000173998	0.000176883	0.000291559	0.000221301	0.000208798	0.000143007
Estonia	0.0013965	0.00127077	0.00113308	0.00137027	0.00109684	0.00108575	0.00132537	0.00133434	0.00145709	0.0012955	0.00131951	0.00124115	0.00126144	0.00132146	0.00159893	0.00149402	0.00159438	0.00153641	0.00155088	0.00147108	0.00143439
Ethiopia	0.00264694	0.0020546	0.00268246	0.00259323	0.00214547	0.00229203	0.00417933	0.00380076	0.00396155	0.00386008	0.00343073	0.00324821	0.00292218	0.00214692	0.00287958	0.00342532	0.00440447	0.00327335	0.00314013	0.00299153	0.00262468
Fiji	0.000443154	0.00054058	0.000472863	0.000639044	0.000415654	0.000341109	0.000216481	0.00034226	0.000443812	0.000444275	0.000457144	0.000211965	0.000258594	0.000332408	0.00060294	0.000282895	0.000146318	0.000251914	0.000248591	0.000222481	0.000199984
Finland	0.0078742	0.0081421	0.00788652	0.00383229	0.00679759	0.00225256	0.00594843	0.00594179	0.00624197	0.00567809	0.0050429	0.00466414	0.00475152	0.00412136	0.00492938	0.0046073	0.00458005	0.00465996	0.00470516	0.00444643	0.00433986
Netherlands Antilles	1.20689e-05	1.66111e-05	1.74078e-05	1.09904e-05	8.4008e-06	1.24358e-05	3.96846e-06	3.36598e-06	3.07666e-06	1.82289e-06	1.79545e-06	2.28894e-06	1.28916e-06	1.27555e-06	1.65359e-06	1.22446e-07	4.91609e-07	4.9934e-07	N/A	N/A	N/A
France	0.00728253	0.00715404	0.00803527	0.00930995	0.00612848	0.0067868	0.00849351	0.00775793	0.00859286	0.00806807	0.00790119	0.00813941	0.0077583	0.00837186	0.0102517	0.00859554	0.00922219	0.0087821	0.00906632	0.00822292	0.00828195
French Polynesia	3.42844e-06	3.00251e-06	3.1041e-06	3.53019e-06	2.84553e-06	2.80196e-06	2.69389e-06	2.34382e-06	2.33615e-06	1.36117e-06	1.51877e-06	1.34951e-06	1.15042e-06	1.11605e-06	1.1861e-06	1.12144e-06	1.4746e-06	1.4554e-06	1.2627e-06	1.08703e-06	1.21183e-06
Gabon	0.00454046	0.00423626	0.00572733	0.00285595	0.00772471	0.00537974	0.0059267	0.00548518	0.00671513	0.00561892	0.00600875	0.00607168	0.00593523	0.00551906	0.00916778	0.00582749	0.00494093	0.00560358	0.00378617	0.00344021	0.00354109
Gambia	N/A	N/A	N/A	N/A	N/A	N/A	N/A	N/A	2.69788e-05	3.32262e-05	1.39689e-05	5.34093e-06	N/A	N/A	3.1611e-05	3.79876e-05	6.13678e-05	7.87789e-05	7.78001e-05	5.73926e-05	7.18937e-05
Georgia	0.000528444	0.00062543	0.00075192	0.000438959	0.000951574	0.000824629	0.000901452	0.00092061	0.00124324	0.00101325	0.000915531	0.000684302	0.000589551	0.000632959	0.000686399	0.00093738	0.000782541	0.000861213	0.000632515	0.000698542	0.00068307
Germany	0.0032289	0.00309741	0.00327776	0.00464174	0.0033634	0.00411118	0.00499369	0.00509227	0.00544032	0.00513158	0.00563737	0.00580213	0.00577949	0.00553721	0.00736546	0.0059603	0.00588523	0.00602706	0.00597847	0.0057752	0.00570043
Ghana	0.00194154	0.00187707	0.0018681	0.00225342	0.00213616	0.00239039	0.00319156	0.00308757	0.0036374	0.00260111	0.00209401	0.00247352	0.00255604	0.00248636	0.00368954	0.00284517	0.00349892	0.00383433	0.00339542	0.00342652	0.00321158
Greece	0.000707479	0.000468963	0.000562677	0.000619132	0.000753218	0.00049453	0.00113318	0.000915355	0.000997654	0.000724504	0.00110597	0.00108519	0.000974485	0.000960916	0.000975203	0.00135308	0.00160323	0.0018409	0.0018788	0.00196807	0.00177221
Greenland	6.61352e-06	1.28856e-05	8.50854e-06	6.00425e-06	7.45056e-06	1.36399e-06	8.19623e-06	6.1981e-06	9.57158e-06	7.92674e-06	8.45371e-06	3.97729e-06	6.0061e-06	3.34757e-06	6.56919e-06	3.11633e-06	8.64607e-07	8.48045e-07	8.93892e-07	1.23991e-06	1.20424e-06
Grenada	7.0838e-06	9.03753e-06	8.26738e-06	6.69243e-06	9.6213e-06	6.44933e-06	5.88029e-06	5.98048e-06	1.42516e-05	4.86738e-06	1.28276e-06	1.08607e-06	1.18014e-06	6.51586e-07	1.9643e-06	6.27351e-07	6.86507e-07	6.93973e-07	6.7145e-07	1.22401e-06	1.01476e-06
Guatemala	0.00222425	0.00341586	0.00327724	0.0020403	0.00302738	0.00253241	0.00231953	0.00191251	0.00200495	0.00217521	0.002042	0.00197756	0.0016865	0.00152884	0.00206192	0.00182177	0.00179672	0.00158317	0.0013526	0.00129313	0.00123738
Guinea	0.000849982	0.00068007	0.000740871	0.000787825	0.00101632	0.000581677	0.000930157	0.00057265	0.000535207	0.00042518	0.000627515	0.000813916	0.000712274	0.000989788	0.000795983	0.000849103	0.000644755	0.000707704	0.000653098	0.000725726	0.000703292
Guinea-Bissau	0.000108411	8.83531e-05	0.000124328	8.16765e-05	0.000130662	0.000175761	0.000153588	0.000102023	0.000105837	0.00011399	0.000113829	8.84583e-05	0.000116781	0.000114734	0.000160705	0.000157668	0.000189851	0.000139742	0.000162215	0.000183435	0.000228154
Guyana	0.0011936	0.00120052	0.00108994	0.00112971	0.000964393	0.000705469	0.000780353	0.00140226	0.000795936	0.000723978	0.000463321	0.000503005	0.000404269	0.00040494	0.000726033	0.00032766	0.000314396	0.000367698	0.00141819	0.0013705	0.00130915
Haiti	0.000162202	0.000231607	0.000215358	0.000158176	0.000239357	0.000217175	0.000156365	0.00016867	0.000221048	0.000136965	0.000150225	0.00013959	0.000102868	N/A	N/A	N/A	N/A	N/A	N/A	N/A	N/A
Honduras	0.0031989	0.00458606	0.00455532	0.00294812	0.00402461	0.00336014	0.00268138	0.00210074	0.00283409	0.00299953	0.0029826	0.00289535	0.00262589	0.00243977	0.00283166	0.00249821	0.00242897	0.00255719	0.00267412	0.00246601	0.00240699
Hungary	0.00165738	0.00150188	0.00144624	0.00152932	0.00141836	0.00141659	0.00184794	0.00184997	0.00190093	0.00163255	0.00179246	0.00199182	0.00214859	0.00221558	0.00298948	0.00227593	0.00225631	0.00235165	0.00220429	0.00209014	0.0020924
Iceland	0.000987584	0.00117492	0.0011801	0.000774745	0.00100527	0.000686842	0.00105124	0.00102185	0.00108971	0.0010075	0.000806832	0.000889581	0.000919481	0.000924255	0.00154263	0.000998721	0.00103823	0.00105424	0.000851717	0.000761062	0.000761036
India	0.00747626	0.00758722	0.00921789	0.0185026	0.0087713	0.00806974	0.00989105	0.0106096	0.0107803	0.0134925	0.0113051	0.0121139	0.011505	0.0131301	0.0139194	0.0127731	0.0146137	0.0164882	0.0170516	0.0136192	0.0123877
Indonesia	0.0368261	0.0377869	0.0346109	0.0414986	0.0479483	0.0386259	0.0357111	0.0295911	0.0223708	0.0257764	0.0278595	0.0214097	0.0198783	0.0186628	0.0170774	0.0150722	0.0168152	0.0123197	0.0136063	0.0131104	0.012501
Iran	0.010267	0.0105472	0.00854625	0.00482004	0.00808141	0.00567564	0.00629028	0.00648859	0.00688933	0.00647705	0.0076004	0.00773252	0.0074134	0.00630171	0.00629632	0.00786034	0.00675328	0.00581585	0.00682594	0.00507414	0.00613738
Iraq	0.00133655	0.00179275	0.00395022	0.00265499	0.0035468	0.00212739	0.00200144	0.00236137	0.00250788	0.00199199	0.00139476	0.00107453	0.000927035	0.00109325	0.000541035	0.000645509	0.000867144	0.000949399	0.000875065	0.000648594	0.000684563
Ireland	0.00147234	0.00141356	0.00154198	0.00153303	0.00135275	0.00143346	0.00243217	0.00262968	0.00235112	0.00218847	0.00249541	0.00222213	0.00212954	0.00224925	0.00272649	0.00251393	0.0024132	0.00236993	0.00235214	0.00233017	0.00227034
Israel	0.000208533	0.000183364	0.000177629	0.000131188	0.000184591	0.00013344	0.000192506	0.000183423	0.000208074	0.000197808	0.000172156	0.00015588	0.000206081	0.000172711	0.000306763	0.000280119	0.000295051	0.000297092	0.000254404	0.000231326	0.000209342
Italy	0.00436528	0.00360101	0.00337756	0.00353787	0.00263926	0.00212222	0.00269854	0.00257788	0.0025833	0.00235061	0.00244503	0.00242473	0.00250417	0.00250012	0.00321762	0.00280432	0.00299767	0.00317496	0.00311202	0.00306573	0.00303349
Jamaica	0.000326802	0.000211863	0.00020051	0.000232723	0.000210608	0.000173538	0.000155049	0.000149128	0.000153452	0.000110023	8.47745e-05	0.000112227	7.43283e-05	6.74245e-05	0.000104034	7.37939e-05	5.08691e-05	7.70837e-05	7.26872e-05	6.22365e-05	6.02557e-05
Japan	0.00062592	0.000621455	0.000649706	0.000654288	0.000586605	0.00046904	0.000443246	0.000689136	0.000425548	0.000402665	0.00042371	0.000508598	0.000519411	0.000561993	0.000736785	0.000660515	0.000775768	0.000623397	0.000763742	0.000846315	0.000883985
Jordan	0.000225628	0.000299143	0.000285597	0.000173795	0.000244208	0.000188869	0.000129598	0.000136796	0.000145916	0.000103855	0.000116706	0.000112743	8.15721e-05	0.000130833	0.000166133	0.000110476	0.000144832	0.000156002	0.000202706	0.000175127	0.000172484
Kazakhstan	0.0535551	0.0464703	0.0446741	0.0412389	0.0392726	0.042169	0.0345735	0.0354678	0.041727	0.0365744	0.0339545	0.0339953	0.0318619	0.035513	0.0287476	0.0305143	0.0330584	0.0317972	0.025031	0.0265966	0.0166463
Kenya	0.0039957	0.00392331	0.00369205	0.00309352	0.00312894	0.0024184	0.00259881	0.00289941	0.00313884	0.00295006	0.00265246	0.00264992	0.00237967	0.00237352	0.00322923	0.00249631	0.00232608	0.00227149	0.00210614	0.00175977	0.00174118
Kiribati	1.22877e-06	2.3191e-06	3.13122e-06	3.76865e-06	1.39799e-06	9.66732e-07	N/A	9.71378e-07	1.52233e-05	1.38076e-06	N/A	2.11576e-06	9.66242e-06	9.47333e-06	1.61697e-07	1.22919e-06	2.55415e-07	3.6455e-06	1.06621e-05	9.78418e-06	4.17802e-06
Kosovo	5.25634e-05	4.97316e-05	4.72383e-05	4.2612e-05	4.10023e-05	3.11403e-05	4.77775e-05	4.73741e-05	4.93975e-05	5.88277e-05	4.75603e-05	6.24185e-05	3.90971e-05	5.50713e-05	7.56041e-05	8.80849e-05	3.9756e-05	7.93867e-05	6.25909e-05	7.05165e-05	3.09494e-05
Kuwait	1.27758e-05	9.79082e-06	1.45995e-05	6.73991e-06	9.32485e-06	9.52166e-06	1.65965e-05	1.36631e-05	1.09867e-05	1.04637e-05	1.95557e-05	1.98727e-05	1.90517e-05	1.86113e-05	2.06247e-05	1.91585e-05	1.87777e-05	1.91045e-05	2.03668e-05	1.93458e-05	1.76253e-05
Kyrgyz Republic	0.00149658	0.00149535	0.0022415	0.00172578	0.00197117	0.00174765	0.00153863	0.00151466	0.00174009	0.00186814	0.0015381	0.00134528	0.00149972	0.00148763	0.00251709	0.00180193	0.00171908	0.00149536	0.00134692	0.000510409	0.000409682
Laos	0.00226464	0.00248861	0.00272548	0.00238295	0.00294148	0.00264659	0.0023162	0.00250447	0.00235447	0.00263396	0.00303832	0.00288283	0.0031975	0.00249997	0.00174794	0.00181524	0.000683536	0.00158479	0.00228121	0.00227193	0.00222527
Latvia	0.00113257	0.0011214	0.000918913	0.000795797	0.000656643	0.000729875	0.00154801	0.00152824	0.0016968	0.00153909	0.00164418	0.00153415	0.00162179	0.00168305	0.0018908	0.00208305	0.00220612	0.00224316	0.00225279	0.00220804	0.00219252
Lebanon	9.53861e-05	9.50679e-05	8.07167e-05	7.46946e-05	6.40194e-05	5.43975e-05	6.66478e-05	7.9495e-05	6.90733e-05	0.000108286	9.31516e-05	9.91457e-05	0.000102788	0.000100678	0.000137602	9.5349e-05	0.000109714	9.36841e-05	9.4038e-05	0.000116434	0.000115998
Lesotho	0.000145719	0.000242171	0.000291388	0.000352222	0.000219641	0.000218351	0.000270909	0.000300934	0.00034939	0.000316071	0.000264867	0.00025438	0.000230975	0.000326017	0.000433255	0.000330332	0.000382408	0.000305834	0.000293234	0.000298692	0.000353589
Liberia	0.00166644	0.00127387	0.00115573	0.00117908	0.00288861	0.00207171	0.00173408	0.00173899	0.00251681	0.000338802	0.000319282	0.000260812	0.000330595	0.000262503	0.000264263	0.000262217	0.000597405	0.000856635	0.000812999	0.000905247	0.000892052
Libya	0.00103462	0.000557725	0.000606458	0.000508409	0.000395532	0.000356261	0.000601693	0.00060796	0.0012866	0.000677467	0.000655686	0.0016396	0.000834963	0.000882144	0.000524509	0.000450761	0.000451129	0.000908662	0.000531644	0.000515609	0.000418079
Liechtenstein	N/A	N/A	N/A	7.21447e-07	1.70976e-06	N/A	N/A	N/A	1.5505e-06	N/A	N/A	N/A	N/A	N/A	N/A	N/A	N/A	N/A	N/A	N/A	N/A
Lithuania	0.000913884	0.000517037	0.000328098	0.000595403	0.000141969	0.000629727	0.00113562	0.00112858	0.00128543	0.00108521	0.00131557	0.00130902	0.00133157	0.00149197	0.00129589	0.00157736	0.00171807	0.00179086	0.00173356	0.00164142	0.00157131
Luxembourg	7.62818e-05	7.65496e-05	7.72514e-05	8.35531e-05	7.89762e-05	N/A	7.52522e-05	8.29919e-05	9.17133e-05	8.44896e-05	9.01525e-05	9.04377e-05	8.63002e-05	8.54032e-05	0.000125649	9.21025e-05	9.00955e-05	9.0474e-05	8.72984e-05	8.34187e-05	8.11412e-05
Madagascar	0.00438756	0.00328953	0.00400058	0.00150371	0.00798014	0.00828936	0.00645233	0.00550502	0.00316718	0.0046051	0.00502624	0.00660665	0.00461951	0.00600799	0.00391275	0.00421106	0.00349301	0.00403611	0.00384554	0.00393555	0.0039504
Malawi	0.00110731	0.000391217	0.000557293	0.000956001	0.000723978	0.00049468	0.00069121	0.000483556	0.00106938	0.000661075	0.000559323	0.000622381	0.000896277	0.000704189	0.000917515	0.000683223	0.00126875	0.00111021	0.00137906	0.00113833	0.00108884
Malaysia	0.0130344	0.0141702	0.0143433	0.0162367	0.0150981	0.0116734	0.0104765	0.0109681	0.0131834	0.0116107	0.0117524	0.010105	0.0106425	0.0103037	0.0139219	0.00944237	0.00931706	0.00909543	0.00543377	0.00498646	0.00498802
Maldives	N/A	N/A	N/A	N/A	N/A	N/A	3.1149e-06	4.59845e-06	1.9591e-06	1.71379e-06	8.39458e-07	3.38051e-07	3.16148e-07	2.98653e-07	4.67435e-07	3.69581e-07	9.97727e-07	6.20155e-07	4.31456e-07	4.10755e-07	4.33857e-07
Mali	0.004095	0.0034942	0.00452912	0.00371594	0.00385845	0.00374505	0.0111948	0.0116562	0.0122228	0.00910562	0.00692728	0.00918058	0.00958025	0.00752874	0.00348728	0.00820507	0.00816913	0.00901836	0.00329125	0.00323185	0.00300526
Malta	5.74983e-06	2.12364e-06	1.80148e-06	2.60847e-06	1.73444e-06	1.45699e-06	2.31218e-06	2.90632e-06	3.14311e-06	3.00707e-06	3.12415e-06	2.6319e-06	2.7799e-06	2.94357e-06	4.20414e-06	2.87718e-06	3.31536e-06	2.9143e-06	3.38426e-06	2.73334e-06	2.65498e-06
Marshall Islands	6.26943e-07	5.28186e-07	5.31389e-07	N/A	2.82279e-07	2.14626e-07	3.62128e-07	1.82482e-07	2.2865e-07	1.30177e-07	1.43651e-07	1.03977e-07	1.05234e-07	1.10277e-07	1.56762e-07	1.05317e-07	3.98001e-08	8.47988e-08	6.51267e-08	4.29643e-08	5.20684e-08
Mauritania	0.0026873	0.00293454	0.00256417	0.00326293	0.00216526	0.00186609	0.00166552	0.00166482	0.00106342	0.00114268	0.00113034	0.00179748	0.000890789	0.000586106	0.00134404	0.00144939	0.000745458	0.00141549	0.00107492	0.00146763	0.00151834
Mauritius	3.18076e-05	3.02243e-05	2.77396e-05	3.00078e-05	2.55141e-05	1.93069e-05	2.59299e-05	2.27098e-05	1.90367e-05	1.55753e-05	1.42923e-05	1.40763e-05	1.29211e-05	1.27877e-05	1.75576e-05	1.24644e-05	1.23303e-05	1.17453e-05	1.22653e-05	1.22463e-05	1.18539e-05
Mexico	0.0186435	0.0184481	0.0116745	0.00888393	0.01094	0.00894133	0.0108806	0.00759053	0.0110682	0.00868174	0.00866279	0.0103366	0.0093743	0.00834373	0.012632	0.0111583	0.0122734	0.0134404	0.0180752	0.020153	0.021512
Micronesia, Fed. Sts.	3.54096e-06	N/A	3.02921e-06	3.08403e-06	2.77426e-06	2.46327e-06	2.29511e-06	2.35676e-06	2.26879e-06	1.565e-06	1.78429e-06	1.54906e-06	2.08399e-06	2.18556e-06	2.79035e-06	2.24819e-06	3.83451e-06	1.09829e-05	9.50097e-06	1.33925e-06	1.28761e-06
Monaco	N/A	N/A	N/A	N/A	N/A	N/A	N/A	N/A	N/A	N/A	N/A	N/A	N/A	N/A	N/A	N/A	N/A	N/A	N/A	7.33838e-06	3.10735e-06
Mongolia	0.0149626	0.0120972	0.01878	0.0137608	0.0175759	0.0144608	0.0155539	0.0153876	0.019656	0.0154385	0.012861	0.0186061	0.0166887	0.0118523	0.0167855	0.0204386	0.0137103	0.0105034	0.00909504	0.0128781	0.0109383
Montenegro	0.000116395	0.000219589	0.000219677	0.000102935	0.000142194	0.000111635	0.000193819	0.000245565	0.00017334	0.000279998	0.000289674	0.000244854	0.000223555	0.000146196	0.000169307	9.39858e-05	7.30032e-05	6.83564e-05	7.73171e-05	7.18629e-05	7.09311e-05
Montserrat	2.43669e-06	3.90443e-06	N/A	1.107e-06	1.16832e-06	1.13649e-06	8.06292e-07	7.77323e-07	6.98994e-07	4.16494e-07	1.32145e-07	3.25016e-07	6.71329e-07	1.17345e-07	1.60996e-07	4.53675e-07	1.49925e-07	2.68405e-07	9.25913e-08	2.60995e-07	9.84789e-08
Morocco	0.00308886	0.00272667	0.00278832	0.00235656	0.00264263	0.00177303	0.00255125	0.00263338	0.00271559	0.00233838	0.00237991	0.0024936	0.00241649	0.0024026	0.00294001	0.00239879	0.00247399	0.00239653	0.00216223	0.00227896	0.00206694
Mozambique	0.00382074	0.00514619	0.0042622	0.00338474	0.00919255	0.00297768	0.00802438	0.0078358	0.00821772	0.0106014	0.00537279	0.00471233	0.00900998	0.00637519	0.00742807	0.0100083	0.00638722	0.00915247	0.00952175	0.00905503	0.00864673
Myanmar	0.00460717	0.00473538	0.00482875	0.00388221	0.00692996	0.00714432	0.00591066	0.00584749	0.00453276	0.00682089	0.00737576	0.00810034	0.00861719	0.00737836	N/A	N/A	0.00360996	0.00425532	0.00670716	0.00598272	0.00593226
Namibia	0.0092547	0.0104689	0.009772	0.00736653	0.00885282	0.00718304	0.0106716	0.00651697	0.00741533	0.00568717	0.00692211	0.0056839	0.00563945	0.0072041	0.00821059	0.00607962	0.00646586	0.00661382	0.00759486	0.00727462	0.00623388
Nauru	N/A	7.1497e-08	9.57237e-08	1.18516e-07	7.78393e-08	N/A	2.44507e-08	N/A	3.01001e-08	N/A	N/A	3.62744e-08	5.42864e-08	2.883e-08	6.59863e-08	9.78699e-09	3.46751e-08	5.22661e-09	5.3481e-09	3.54365e-08	2.35154e-09
Nepal	0.0017856	0.00140296	0.00165651	0.00146586	0.00119173	0.000993551	0.0015017	0.00137749	0.000791723	0.00110387	0.000972081	0.000884434	0.0020163	0.00104434	0.00138666	0.000801266	0.000668105	0.0007297	0.000815264	0.000728489	0.000765955
Netherlands	0.00087061	0.000832875	0.000864079	0.000929779	0.000979801	0.000840315	0.00121461	0.00120992	0.00129725	0.00120317	0.00101611	0.0011734	0.00113689	0.0011477	0.00150134	0.00119584	0.00120914	0.00121232	0.00115525	0.00110687	0.00107272
New Caledonia	N/A	N/A	0.000100369	0.000135848	0.000105436	0.000112663	6.40386e-05	7.06146e-05	0.000185058	6.14252e-05	7.5448e-05	7.27515e-05	1.9592e-05	2.109e-05	2.11418e-05	2.1099e-05	1.00001e-05	1.08117e-05	3.14281e-05	5.48746e-05	5.28222e-05
New Zealand	0.00771712	0.0088129	0.00854514	0.00681901	0.00791865	0.00652574	0.00635089	0.0065655	0.0069609	0.00675917	0.0066365	0.00660013	0.00655664	0.00639743	0.00847404	0.00584544	0.00542351	0.00566434	0.00480066	0.00459733	0.00474444
Nicaragua	0.0029344	0.00275426	0.00209131	0.00186961	0.00216481	0.00220498	0.00202951	0.00185736	0.00219255	0.00250203	0.00210851	0.00176225	0.00151582	0.00151849	0.00195684	0.00244396	0.00222406	0.00261355	0.00288495	0.00274544	0.00262532
Niger	0.00870132	0.00825043	0.00764904	0.00575763	0.00549683	0.00554748	0.00535627	0.0049274	0.00562153	0.00516986	0.00495183	0.00412772	0.00349724	0.00477641	0.0067878	0.00518301	0.00500475	0.00470396	0.00514029	0.00422664	0.00366444
Nigeria	0.00808764	0.00660847	0.00909967	0.00486173	0.00656891	0.00979945	0.0102165	0.00775066	0.00708459	0.00693304	0.00660726	0.00935349	0.00594927	0.00727213	0.00751478	0.00728465	0.00975599	0.0150054	0.0075441	0.00808813	0.00811407
Norway	0.00397329	0.00402557	0.00412778	0.00313133	0.00377401	0.00298909	0.00342659	0.0028239	0.00339791	0.00327433	0.00316656	0.00328401	0.00342696	0.00372124	0.00455484	0.00351362	0.00437171	0.00494255	0.00567869	0.00538487	0.00536868
Oman	0.000158516	0.000140955	0.000153164	0.000144077	0.00018417	0.000430929	0.00036481	0.000398895	0.000413636	0.000428286	0.000437662	0.000425228	0.000390985	0.000368377	0.000542269	0.000469101	0.000432665	0.000394732	0.000383662	0.000409406	0.000399208
Pakistan	0.00472146	0.00505882	0.00468972	0.00448877	0.00392743	0.00386933	0.00519818	0.00727239	0.00584985	0.00377526	0.00345992	0.00299541	0.00380103	0.00292462	0.00317922	0.00319617	0.00606864	0.00412378	0.00476742	0.00293008	0.00292721
Palau	1.99438e-06	N/A	N/A	1.19509e-06	N/A	9.86066e-07	3.20406e-06	3.62727e-06	4.21247e-06	2.14128e-06	5.17128e-06	5.44418e-06	4.99978e-06	4.41876e-06	6.33192e-06	5.96579e-06	5.22767e-06	1.417e-05	1.22829e-05	1.32313e-05	1.26431e-05
Panama	0.00199507	0.00168929	0.00184981	0.00155518	0.00134138	0.00110922	0.00175789	0.00157157	0.00206113	0.0014893	0.00180927	0.00177203	0.00166993	0.0015397	0.00216659	0.00151799	0.00135176	0.00153384	0.00108694	0.00100008	0.000974434
Papua New Guinea	0.009454	0.0101663	0.0103163	0.00645057	0.0101709	0.00860456	0.00744257	0.00736096	0.0115695	0.00958209	0.0101726	0.0103177	0.0107393	0.0105165	0.0145715	0.0066608	0.00378028	0.00542562	0.00601278	0.00622745	0.00684097
Paraguay	0.0106099	0.0136403	0.0127361	0.00932318	0.0111498	0.00781964	0.00738804	0.00916351	0.00928491	0.00883858	0.00955025	0.00972891	0.00977984	0.00856473	0.0117717	0.00884478	0.00849681	0.00863899	0.00903411	0.00772269	0.0074145
Peru	0.00458958	0.00478946	0.00520639	0.00401933	0.00574693	0.00484599	0.00585393	0.00621915	0.00552274	0.00719026	0.00818427	0.00900733	0.00755479	0.00734145	0.00832866	0.00769627	0.00718275	0.00710707	0.00650249	0.00610149	0.00615172
Philippines	0.00356469	0.00333316	0.00387957	0.00311595	0.0037108	0.00292675	0.00304481	0.00321139	0.00230319	0.00273013	0.00261607	0.00261688	0.00223874	0.00175526	0.00201551	0.00198614	0.00190699	0.00182541	0.00175249	0.001857	0.00179984
Poland	0.00250474	0.00178375	0.00147196	0.000791727	0.00138854	0.00116791	0.00290216	0.00344211	0.00365528	0.00343675	0.00333289	0.00342728	0.00354456	0.00325277	0.00485141	0.00402767	0.00411098	0.00463091	0.00501147	0.00489583	0.00490121
Portugal	0.00141344	0.00144792	0.00139399	0.000770469	0.00113218	0.000682854	0.00104575	0.00109581	0.00128282	0.00116882	0.00103041	0.00119276	0.00112664	0.00110776	0.00140151	0.00113978	0.00140732	0.00149477	0.00147756	0.00142316	0.00142818
Puerto Rico	0.000280993	0.000293763	0.000316823	0.000248637	0.000256549	0.000204462	0.00016606	0.00014699	0.000148174	0.000151869	0.000153398	0.000157947	N/A	N/A	0.000181831	N/A	N/A	0.000109425	7.3411e-05	6.94597e-05	5.62551e-05
Qatar	1.24457e-05	8.98851e-06	1.02808e-05	1.17416e-05	1.42935e-05	1.57056e-05	1.83266e-05	1.40925e-05	1.50755e-05	9.6796e-06	1.00202e-05	1.0306e-05	1.00237e-05	1.00061e-05	1.99894e-05	1.10445e-05	1.04839e-05	1.1115e-05	1.24776e-05	1.02735e-05	9.29933e-06
South Korea	0.00072084	0.000637126	0.00075377	0.0014437	0.000947835	0.000553089	0.000465051	0.000370032	0.000474289	0.000425867	0.000378385	0.000359012	0.000398494	0.000429882	0.000840965	0.000559663	0.00055111	0.000627293	0.000510653	0.000557678	0.000525872
Moldova	0.00126468	0.00110457	0.00104013	0.000901265	0.00101303	0.000703803	0.000801511	0.000955058	0.00102855	0.000872023	0.000888194	0.000751154	0.000724275	0.000603396	0.000891809	0.000810585	0.000759885	0.000796615	0.000818474	0.000809578	0.000797893
Romania	0.00263506	0.00196732	0.00197675	0.00150131	0.00206581	0.00269515	0.00337882	0.00359731	0.00390829	0.00344955	0.00299032	0.00286303	0.00273239	0.00263778	0.00392108	0.00253906	0.00277551	0.00309623	0.00351323	0.00360168	0.00367217
Russia	0.0442804	0.0371189	0.0325594	0.107962	0.0662252	0.181137	0.151986	0.170792	0.137625	0.152674	0.156757	0.155049	0.157709	0.148718	N/A	0.125859	0.13608	0.11102	0.118721	0.125057	0.147052
Rwanda	7.36937e-05	7.75185e-05	8.19966e-05	5.36437e-05	7.52199e-05	5.94088e-05	8.16202e-05	6.87989e-05	9.00677e-05	8.20971e-05	7.6921e-05	8.92564e-05	0.000163275	0.000160825	0.000140486	0.000180241	0.00019626	0.000236287	0.000171878	0.00016318	0.00013172
St. Kitts and Nevis	4.5211e-06	4.09876e-06	3.47866e-06	3.74394e-06	2.99867e-06	1.78981e-06	4.42602e-06	3.02359e-06	2.64755e-06	1.88898e-06	1.48547e-06	9.05667e-07	6.11436e-07	1.94909e-07	8.71956e-07	2.44105e-07	N/A	4.8608e-07	2.10125e-06	8.0748e-07	4.69452e-07
St. Lucia	2.67815e-05	2.32509e-05	1.85525e-05	1.18916e-05	1.70742e-05	1.18632e-05	1.29767e-05	1.66846e-05	8.40872e-06	1.99329e-05	6.64656e-06	5.9381e-06	3.25836e-06	5.51816e-06	8.3894e-06	6.26519e-06	5.17422e-06	2.51764e-06	2.13137e-06	2.9935e-06	2.98203e-06
Samoa	1.75349e-05	1.78656e-05	2.32368e-05	1.73683e-05	1.68626e-05	1.73601e-05	9.45388e-06	1.17751e-05	6.91118e-06	9.49842e-06	9.28454e-06	3.86261e-06	N/A	N/A	4.63804e-06	3.94521e-06	6.2525e-06	5.32392e-06	6.82273e-06	6.79961e-06	6.02142e-06
San Marino	N/A	N/A	N/A	N/A	N/A	N/A	N/A	N/A	1.74351e-06	1.69552e-06	1.751e-06	1.85967e-06	1.57743e-06	1.38713e-06	2.19611e-06	1.07821e-06	9.90548e-07	1.52321e-06	1.39174e-06	1.359e-06	1.43458e-06
Sao Tome and Principe	9.79556e-06	1.07576e-05	1.25724e-05	1.46286e-05	1.60486e-05	1.2162e-05	1.49106e-05	1.33322e-05	1.38195e-05	7.9479e-06	7.99024e-06	6.629e-06	7.65866e-06	6.08211e-06	N/A	1.13531e-05	9.66497e-06	1.07643e-05	9.35902e-06	8.66859e-06	8.37607e-06
Saudi Arabia	0.0023883	0.00235137	0.00237288	0.00079229	0.00228559	0.00197333	0.00217594	0.00276341	0.0028524	0.00264348	0.00289936	0.00276483	0.00273442	0.00257908	0.00225314	0.00230051	0.0018447	0.00182501	0.00252256	0.00230934	0.0024141
Senegal	0.00153525	0.00137043	0.00131585	0.00121994	0.0012397	0.000949349	0.00105018	0.00102531	0.000810906	0.000773891	0.00069808	0.000617187	0.00056195	0.000582194	0.00091262	0.000712627	0.000869422	0.000901337	0.00113197	0.000908353	0.000854319
Serbia	0.000289432	0.000524217	0.000543011	0.000454294	0.000250674	0.000245851	0.000911804	0.00103472	0.000938204	0.000973732	0.00108372	0.00101683	0.000964315	0.000836072	0.00107186	0.00107939	0.00112006	0.00111885	0.0011585	0.0012124	0.00121495
Seychelles	4.05435e-06	6.41506e-06	6.60751e-06	6.23402e-06	4.66142e-06	3.80967e-06	6.72489e-06	4.65865e-06	4.35882e-06	4.10393e-06	2.83152e-06	3.22568e-06	3.23519e-06	3.06891e-06	3.3372e-06	3.31767e-06	2.75026e-06	2.36064e-06	3.21257e-06	2.08484e-06	1.92086e-06
Sierra Leone	0.000496688	0.000347344	0.000273736	0.000301173	0.00027285	0.000222222	0.000160575	0.000173248	0.000273449	0.000353574	0.000269745	0.000266027	0.000287118	0.000247057	0.00042423	0.000544914	0.000518947	0.000682862	0.000910942	0.000912057	0.000861934
Singapore	4.1445e-07	3.11448e-08	2.79353e-07	1.52934e-07	3.94553e-08	4.98303e-08	3.91799e-08	1.67927e-08	4.3067e-07	1.13236e-07	1.51944e-07	1.34646e-07	1.70042e-07	1.83619e-07	4.1119e-07	5.09685e-08	5.53227e-08	1.87358e-08	1.2156e-07	6.45275e-08	9.01639e-08
Sint Maarten	N/A	N/A	N/A	N/A	N/A	N/A	N/A	N/A	N/A	N/A	5.34071e-07	5.1275e-07	4.72633e-07	3.314e-07	4.14749e-07	4.53776e-07	2.51365e-07	3.72095e-07	4.28184e-07	3.45459e-07	4.085e-07
Slovakia	0.00136784	0.000451068	0.000391112	0.000461814	0.000303603	0.000476467	0.000742486	0.000761248	0.000525069	0.00093594	0.00108471	0.00113349	0.000989509	0.00102451	0.00162682	0.00131802	0.00138109	0.00148092	0.00149744	0.00144412	0.00145907
Slovenia	0.000258347	0.000221596	0.000302573	0.000208085	0.000256834	0.000112281	0.000303557	0.000321489	0.000328109	0.000316072	0.000343417	0.00035592	0.000365828	0.000357728	0.000385194	0.000334859	0.000388112	0.000403334	0.000424185	0.00043967	0.000434725
Solomon Islands	0.000580477	0.000566201	0.000546544	0.000540523	0.000519611	0.000422017	0.000355421	0.000353874	0.000933227	0.000719536	0.000311631	0.000740901	0.000486244	0.000830656	0.00119757	0.000583468	0.00036613	0.000618294	0.000582039	0.000534411	0.000496195
Somalia	0.000116274	0.000108894	0.000103911	5.75479e-05	0.000635323	0.000988623	0.000104149	0.000172639	9.74555e-05	0.000483768	0.000726037	0.000541445	0.000391059	0.00038111	0.000854061	0.000828936	0.000785734	0.000797297	0.00117485	0.000446906	0.000389016
South Africa	0.00882314	0.00824672	0.00826702	0.00844073	0.00674339	0.00516677	0.00825414	0.00877476	0.0081701	0.00809105	0.0083319	0.00825914	0.0101477	0.0132139	0.0152153	0.0124112	0.0148033	0.0131676	0.0142204	0.0141605	0.0147279
South Sudan	N/A	N/A	N/A	N/A	N/A	N/A	N/A	N/A	N/A	N/A	N/A	N/A	N/A	N/A	N/A	N/A	N/A	N/A	N/A	N/A	N/A
Spain	0.00659879	0.0065732	0.00810106	0.00703195	0.0077905	0.00657	0.00677571	0.00689459	0.00771615	0.00672024	0.00692628	0.00686503	0.00702521	0.0067337	0.00840141	0.00751911	0.00802735	0.00867945	0.00889275	0.00888103	0.00857079
Sri Lanka	0.00128639	0.00148828	0.0015695	0.00117213	0.00148141	0.00123097	0.000954405	0.00114522	0.00132287	0.00123809	0.00117882	0.00119146	0.0010684	0.000993908	0.00114571	0.000907202	0.000823696	0.000898841	0.000644878	0.000621278	0.000589414
St. Vincent and the Grenadines	8.37935e-06	7.7832e-06	5.96897e-06	4.21262e-06	7.11793e-06	8.2545e-06	5.51398e-06	1.07166e-05	1.22779e-05	7.82015e-06	4.35887e-06	4.3042e-06	3.33257e-06	2.17474e-06	3.80743e-06	1.67301e-06	1.52997e-06	1.11016e-06	6.18886e-07	5.72964e-07	4.58375e-07
Palestine	3.4668e-06	2.2459e-06	2.30184e-06	2.93013e-06	2.01021e-06	6.38773e-06	3.65385e-06	3.10977e-06	2.76555e-06	2.43641e-06	2.13412e-06	1.83094e-06	2.62096e-06	2.96085e-06	4.76748e-06	3.44636e-06	3.81055e-06	4.23286e-06	5.70561e-06	5.14823e-06	6.01904e-06
Sudan	0.00471973	0.00517612	0.00470042	0.00343006	0.0178532	0.0173961	0.00650724	0.0137458	0.0126383	0.0151454	0.0140735	0.0134564	0.01421	0.0154872	0.0135135	0.0152532	0.0146104	N/A	N/A	N/A	N/A
Suriname	0.000978032	0.00150887	0.00165481	0.0014198	0.00129161	0.000683345	0.00086264	0.000780516	0.000503784	0.000555868	0.000818175	0.00101295	0.000921717	0.000945645	0.00145726	0.00105054	0.000921033	0.00104346	0.000805108	0.000776258	0.000730966
Swaziland	N/A	0.00039528	0.000403183	0.000331544	0.000348804	0.000282409	0.000245013	0.000263997	0.00029719	0.000251693	0.000207044	0.000165215	0.000141578	0.000152131	0.000234805	0.000138716	0.00012942	0.000165617	0.000175804	0.000200348	0.000184847
Sweden	0.00694302	0.00631821	0.00720905	0.00377501	0.00652847	0.00325709	0.00833092	0.00900289	0.00952537	0.00904376	0.0095596	0.00883131	0.00803341	0.00789376	0.0111864	0.00785798	0.0073978	0.00745299	0.0067197	0.00664095	0.00651212
Switzerland	0.000892876	0.000818238	0.000781064	0.000627072	0.000796092	0.000655319	0.000794296	0.000748713	0.000803612	0.000750219	0.000760195	0.000775018	0.000771275	0.000773996	0.000992777	0.000811324	0.000819573	0.000819443	0.000881019	0.000775938	0.000763916
Syria	0.00199026	0.00241897	0.00239765	0.00199293	0.00158537	0.00144105	0.0014862	0.00212935	0.00221179	0.00244769	0.00192174	0.0018781	0.00187733	0.00166174	0.00186924	0.00151411	0.00128212	0.00145605	0.00150762	0.00133645	0.00134479
Macedonia	0.00027867	0.000223963	0.000285339	0.000279504	0.000284705	0.000219062	0.000324088	0.00028213	0.000340909	0.000311673	0.000297613	0.000320442	0.000358677	0.000282097	0.000306162	0.000235203	0.000277886	0.000272165	0.000226245	0.000237525	0.000237185
Tajikistan	N/A	0.00131822	0.00142285	0.000839381	0.00109682	0.00116153	0.000934391	0.000788236	0.000860453	0.000634978	0.000558483	0.000721996	0.000560598	0.000448416	9.33591e-05	0.00027637	0.000134623	0.000225814	N/A	9.63163e-05	0.000141897
Thailand	0.0102358	0.00945788	0.0103929	0.00993478	0.00903569	0.0076277	0.00702351	0.0069017	0.00734594	0.00752873	0.00715927	0.00704038	0.00649904	0.00661679	0.00918438	0.00747078	0.00711959	0.00780395	0.00788222	0.0076828	0.00771564
Timor-Leste	5.88225e-05	3.07506e-05	2.73413e-05	2.19031e-05	5.02349e-05	3.33036e-05	N/A	3.34036e-05	7.08172e-05	0.000175839	0.000156355	0.000238056	0.0002209	0.000174216	0.000286803	0.000225636	0.000165021	0.000246487	0.000230283	0.000206636	0.000210171
Togo	0.000683659	0.000725307	0.000655824	0.000742864	0.000650894	0.000515328	0.000614693	N/A	0.000655255	0.000534487	0.000502566	0.00043911	0.000448565	0.000441323	0.000609127	0.000538636	0.000524194	0.0006943	0.000610853	0.000601967	0.000568893
Tonga	4.25153e-06	4.21035e-06	4.4887e-06	6.08354e-06	3.77107e-06	5.62847e-06	1.69977e-06	5.27158e-06	5.60438e-06	5.58408e-06	6.45358e-06	5.11766e-06	3.25174e-06	1.35835e-07	3.13761e-06	1.32459e-06	5.30202e-06	4.47194e-06	4.89077e-06	3.70832e-06	4.79369e-06
Trinidad and Tobago	0.000160564	0.000214384	0.000225043	0.000115637	0.000134544	0.000135973	0.000109138	9.18223e-05	0.000101596	7.96072e-05	0.000117386	0.000142659	3.94649e-05	4.40749e-05	5.19464e-05	7.66324e-05	8.29123e-05	8.06686e-05	3.23165e-05	3.03554e-05	2.62309e-05
Tunisia	0.000829533	0.000871837	0.000867948	0.00092696	0.000758982	0.000642447	0.0010477	0.000989099	0.00101578	0.000643146	0.000616575	0.000545764	0.000527999	0.000619265	0.000850122	0.000742669	0.000941587	0.000748798	0.00115722	0.000942307	0.000907171
Turkey	0.00483201	0.00528005	0.00557439	0.005308	0.00424988	0.00282609	0.00469277	0.0040094	0.00412038	0.00358817	0.0037937	0.00378675	0.00324404	0.00339383	0.00499177	0.00374277	0.00401572	0.00476655	0.00449294	0.00468628	0.00427226
Turkmenistan	0.0062462	0.00590894	0.00263925	0.00277215	N/A	N/A	0.00269165	0.00275423	0.00272675	0.00235325	0.00280787	0.0034207	0.0022835	0.00249834	0.00404069	0.00345876	0.00338413	0.00347601	0.0034508	0.00303418	0.00318626
Turks and Caicos Islands	6.03751e-06	N/A	N/A	6.09075e-06	6.28167e-06	5.99744e-06	4.50875e-06	4.56494e-06	4.21642e-06	3.71872e-06	2.99064e-06	2.68372e-06	2.26412e-06	2.57981e-06	4.31764e-06	3.85306e-06	3.84697e-07	2.04018e-07	1.23178e-06	2.39095e-07	2.5218e-07
Tuvalu	N/A	N/A	3.42223e-08	3.92779e-08	N/A	1.34245e-08	N/A	N/A	1.27098e-08	7.93474e-09	8.23415e-09	8.83644e-09	9.15456e-09	8.22157e-09	2.98554e-08	N/A	1.35287e-08	N/A	N/A	N/A	1.21426e-08
Tanzania	0.00631239	0.00507245	0.00418545	0.0030987	0.00318564	0.00297742	0.00445104	0.00462383	0.00653747	0.00490917	0.00497392	0.00445966	0.00597062	0.00505204	0.00714076	0.00668165	0.00602882	0.00624085	0.00566482	0.00685513	0.00676057
Uganda	0.00121696	0.00147031	0.00134935	0.00104936	0.00106508	0.000780842	0.00104661	0.00096707	0.00107718	0.00109747	0.000993102	0.000829199	0.00131674	0.00119061	0.00175901	0.00145759	0.00162494	0.00187896	0.00195486	0.00168815	0.00165287
Ukraine	0.0175921	0.0178585	0.0156541	0.0131741	0.0195503	0.0140711	0.0138605	0.0145162	0.0157887	0.0168473	0.016293	0.0155777	0.0141757	0.0156176	0.018864	0.0156771	0.0154596	0.0157142	0.0147888	0.0143647	0.0142993
United Arab Emirates	0.000185668	0.000204937	0.000213972	0.000171435	0.000220772	0.000163727	0.000166664	0.000170529	0.000194374	0.000147346	0.000164814	0.000141342	0.000156752	0.000145934	0.000169809	0.000125523	0.000128611	0.000122247	0.000134493	0.000107733	0.000103681
United Kingdom	0.00214314	0.0020343	0.00197572	0.00221447	0.00165214	0.00157335	0.00233988	0.00235878	0.00262892	0.00258105	0.00269337	0.00275827	0.00246548	0.00219273	0.00293088	0.00254255	0.00263964	0.00250713	0.002433	0.00230362	0.00234948
United States	0.0815461	0.0755843	0.0788964	0.0782205	0.0524829	0.0477337	0.0659264	0.051646	0.0716346	0.0566098	0.0574981	0.0557446	0.0636555	0.0724724	0.0938731	0.0760472	0.0806199	0.0849745	0.08132	0.0824827	0.0795242
Uruguay	0.003759	0.00606085	0.00608346	0.00335222	0.00492377	0.00340629	0.00399231	0.00400211	0.00511308	0.00534498	0.00537793	0.00536571	0.0050202	0.00494013	0.00642315	0.00532401	0.00500726	0.00505763	0.00452935	0.00477082	0.00459721
Uzbekistan	0.00335346	0.00318192	0.00266533	0.00245733	0.00192017	0.00181417	0.00211447	0.00205222	0.00269216	0.00284261	0.00233708	0.00217791	0.00211893	0.00197457	0.00246776	0.00239638	0.00240918	0.00179916	0.00181516	0.00155088	0.00169458
Vanuatu	0.000214798	0.000219014	0.00023579	0.000175556	0.000148994	0.000130196	0.000145006	0.000114922	0.000216372	9.04526e-05	0.000228326	0.00035538	9.43238e-05	0.000177982	0.000187877	8.68788e-05	0.000224736	0.000267713	0.000261111	0.000212273	0.000211843
Venezuela	0.00500808	0.00628764	0.0052342	0.00253161	0.00305676	0.00220496	0.00173564	0.0031606	0.0026787	0.00314532	0.00305001	0.00278044	0.00182399	0.00151269	0.000537342	0.00157379	0.00151887	0.00122114	0.000829594	0.00108279	0.00104947
Vietnam	0.00414072	0.00533107	0.00577363	0.00482468	0.00594552	0.00503597	0.00488608	0.0048572	0.00520543	0.00541262	0.00539189	0.00499577	0.00510269	0.00441056	0.00520248	0.00478244	0.00444444	0.00492695	0.0049893	0.00488705	0.00485492
Yemen	0.00100676	0.0013154	0.00117534	0.000805637	0.00278948	0.00227134	0.00116548	0.00106697	0.000866134	0.000972422	0.00109574	0.00108209	0.000996807	0.00102657	0.000954597	0.00114634	0.0012428	0.00124717	0.00119099	0.000792839	0.000675111
Zambia	0.00831563	0.00773111	0.00928062	0.00413805	0.00488204	0.00474878	0.00728906	0.00455349	0.00586926	0.00538461	0.00468027	0.00422899	0.004805	0.00419882	0.00647786	0.0056393	0.00723961	0.00990935	0.00746617	0.0104793	0.00958788
Zanzibar	2.39338e-05	2.40703e-05	2.70214e-05	9.68511e-06	2.13954e-05	7.77541e-06	2.54535e-05	2.50299e-05	2.00115e-05	2.39247e-05	2.24153e-05	1.91758e-05	1.45937e-05	2.2766e-05	1.64204e-05	2.50316e-05	1.43616e-05	2.84086e-05	2.7176e-05	2.70749e-05	1.6378e-05
Zimbabwe	0.00580736	0.00674368	0.00637106	0.00688466	0.00674717	0.0065271	0.00619811	0.00450203	0.00334875	0.00374124	0.00251552	0.00175348	0.00169464	0.00196225	0.00153655	0.00222724	0.00194201	0.00226822	0.00143989	0.0013769	0.00126343
Taiwan	0.00198487	0.00191299	0.00190989	0.00149732	0.00176664	0.000751612	0.0011693	0.00112983	0.00136206	0.00120755	0.0012055	0.00120986	0.000660928	0.00111565	0.00159522	0.00120487	N/A	0.00121106	0.00118111	0.00116592	0.000749043

## Sheet: land_imports
Country Name	1995	1996	1997	1998	1999	2000	2001	2002	2003	2004	2005	2006	2007	2008	2009	2010	2011	2012	2013	2014	2015
Afghanistan		3054.08	3081.61	3143.93	1432.13			37696.2	29657.2	23509.5	20574.7	21865.2	27104.8	34485.9	22137.1	18249	24230.8	23164.2	17318.8	23001.1	18679.8
Albania	1074.47	1354.48	1023.69	1404.32	1739.31	1833.14	3621.29	8509.05	8115.46	9984.37	10269	11569	12260.5	10127.1	7201.5	8498.82	10096.7	6225.7	6843.63	6117.25	6266.25
Algeria	59082.8	58341.6	56972.5	51258.7	53210.2	44259.9	65637.9	117755	81205.1	92192.5	87965.8	68427.3	73515.7	90422.7	75630	59650.8	83282.5	77180	78285.3	87795.6	82098.8
Andorra	432.117	399.575	451.316	462.654	451.525	399.915	375.086	423.743	454.039	589.244	581.197	714.692	1055.68	694.181	535.83	791.226	709.098	602.554	467.24	487.532	469.793
Angola	1959.59	2020.29	2489.09	1733.2	7442.98	8111.15	36923.3	42287.7	40238.8	31340.8	46269.4	32389.2	46156.8	65033.6	75745.9	54439.3	52632.8	69631.1	130321	166898	68522.1
Anguilla	151.19	242.319	194.616	254.746	67.9169	213.412	111.713	162.001	101.493		102.32	238.834	189.492	251.99	146.07	215.471	89.4108	86.3192	115.573	128.634	113.453
Antigua and Barbuda	681.896	762.282	589.403	806.475	206.57	474.753	391.454	827.665	910.15	1534.64	547.093	513.938	604.732	640.062	1388.89	1578.56	821.236	2314.16	505.427	545.599	606.081
Argentina	66505	75119.5	80997.5	61371.8	48708	43985.2	57123.3	26646.9	37636.7	46126.5	40967.5	43025.5	60246.8	58516.3	47921.3	37765.8	53024.2	39786.5	57240	53934.7	54682.5
Armenia	2117.46	3122.81	3882.73	3884.36	3068.01	3597.58	4986.88	10689.2	5345.48	5651.8	5981.31	10187.1	13610.9	11520.6	4050.31	12063.9	14060.1	8372.41	8076.12	7998.35	9167.49
Aruba	3143.79	4014.03	3706.04	2002.86	4151.59	2979.19	2623.35	1775.62	1532.74	1952.18	1677.1	1561.22	1692.71	5604.45	7693.92	10295.3	4144.04	2493.45	1969.04	1488.36	1423.86
Australia	46206.5	52223.2	50876	45493.4	61806.7	51437.8	73717.3	84813.4	72518.4	85293.3	100502	95845.6	110144	106588	91116.3	100289	108599	96353.7	91438.5	88512.3	92348.2
Austria	61780.3	53846.4	51069.4	71694.1	67805.7	85392.8	78054.4	82831.6	83001.4	86082.5	79041.8	76543.8	74888.6	71057.4	68754.9	79460.9	77871.3	74881.4	83933.9	78713.6	78003.4
Azerbaijan	7946.37	10219.8	12114.5	14858.9	23063	18445.3	26003.7	27853	32798.5	47893.8	26533	30148.5	32376.7	22543.7	15907.2	47070.1	59156.8	38072.2	52448.9	50842	62647.1
Bahamas	2979.71	2953.51	3454.93	4239.21	3033.68	3020.04	3757.25	2839.39	2510.42	2816.85	2415.07	2794.73	2392.06	2353.65	2843.64	2347.83	2039.49	3054.15	3287.93	3015.08	2660.78
Bahrain	17043.3	11919.1	11890.4	7764.7	10169.3	13134.9	16440.5	18858.7	12021.3	20657.8	16697.2	11670.5	11657.2	32982.5	35759.7	32636.4	25316.8	22903.9	13108.1	13581.4	12031.1
Bangladesh	28437.8	29987.1	30267.2	31039	28957.8	24404	33043.1	42575.1	59527.2	42291.3	46726.4	68196.7	80400.9	48142.2	62998.5	61428.5	71204.5	59203.6	69122.7	70501.3	83301.2
Barbados	2077.39	3298.73	3625.11	2618.52	1714.43	2295.34	2403.58	2671.76	3595.94	3588.91	2806.78	2636.86	2531.49	2975.92	5463.76	3465.71	3243.72	4097.26	1850.4	1686.15	1966.61
Belarus	34402.6	31133.8	36675.5	47859.2	54260.2	61121.8	28747.7	47114.8	49000.3	64108.7	40844.4	49400.2	44965.7	41491.9	12104.3	37643.9	34322.9	31136.4	32560.7	37581.8	36280
Belgium	248789	203912	165796	211723	159195	139286	204346	173686	159679	166512	155587	148798	229360	230933	185331	231886	234594	219884	221557	212522	216850
Belize	494.27	459.743	477.147	605.712	804.866	660.875	737.196	1424.08	1723.71	713.905	610.526	948.196	901.519	2046.51	1970.94	858.93	899.744	552.702	741.338	741.706	936.732
Benin	12014.9	10761.4	8164.85	7629.59	9568.02	6042.23	5085.66	6454.19	12181.2	5661.12	4838.35	4988.96	6599.61	12602.7	6432.74	5839.42	3737.78	3526.72	6598.08	13737.6	12641.3
Bermuda	457.486	231.248	268.341	324.363	250.809	1356.1	3940.76	7143.82	947.546	463.986		212.145	175.744	168.535	166.274	119.76	123.668	117.296	142.779	142.179	135.752
Bhutan	367.384	588.934	616.628	374.176	546.503	43.9693	213.627	416.896	511.113	355.547	535.414	810.29	792.61	608.983	846.559	712.663	918.169	813.854	377.718	619.024	589.369
Bolivia	6883.69	6822.3	7762.35	9109.87	10865.3	10347	11352.5	12975.8	12410.2	12415.3	12193.7	14418.5	10940.9	12892	17085.7	18420.9	13978	13590.9	18097.1	23264.8	24365.3
Bosnia and Herzegovina	2006.6	3370.57	4100.71	4914.36	5287.04	6197.69	9739.91	10973.9	9201.85	11364.8	12898.6	7976.43	7532.14	9056.84	7534.05	9008.03	8054.2	7558.58	7021.94	8023.13	8142.06
Botswana	7229.43	7605.75	9341.02	11584.9	8334.21	9841.09	30000.4	28987.9	9473.2	11468.3	6529.12	6581.06	34164.9	6946.78	6395.83	7118.6	65039.1	8908.43	7348.47	6222.34	34743.2
Brazil	137467	160701	167165	126085	105843	122527	165092	293664	207808	189367	206703	283277	213959	222964	197658	205724	251622	212755	237555	252898	203107
British Virgin Islands	233.201	239.239				1208.97	2293.25	951.968	632.292	576.22	320.834	170.43	221.306	161.058	166.546	144.989	115.354	83.1043	67.2841	83.8445	87.2342
Brunei Darussalam	7345.33	8651.19	7935.24	6130.11	9735.06	4724.47	9922.21	14790.3	7770.37	3773.66	1738.04	3486.82	3036.61	2064.69	3059.15	1271.33	3895.3	6112.93	6840.05	5121.91	5405.52
Bulgaria	6358.4	5387.36	4663.81	6238.98	5561.84	5633.24	13374.9	12597.1	11840.3	17235	12189	13178.1	15458.3	18269.3	11369.6	11435.6	13474.9	12408.8	15853.9	13739.4	14588.5
Burkina Faso	12161.4	12821.8	12628.6	10709.6	6089.17	3269.68	5481.43	14660.6	5978.87	6607.34	6979.49	19368.6	6365.54	4513.54	5460.17	6292.79	11676.8	17310.5	6589.47	10788.9	8090.54
Burundi	1677.7	820.198	808.164	539.514	788.013	1387.78	2988.12	3251.24	4284.92	2316.7	2663.42	2525.29	3922.87	2529.71	6680.66	2001.21	8181.2	5076.57	3576.02	3008.74	2768.22
Cabo Verde	771.499	943.353	1009.93	798.422	1693.32	633.218	773.465	978.406	1206.86	1140.75	1324.46	1251.24	1010.71	1436.3	819.898	841.86	792.33	960.664	1428.32	903.07	843.082
Cambodia	742.638	561.061	645.383	1753.71	1886.96	2391.07	2691.27	3317.74	2552.41	3592.65	2538.97	3254.91	3368.19	3041.19	2663.33	2523.68	2645.71	2860.03	3173.05	3636.16	4368.38
Cameroon	1775.98	1940.69	2072.06	1711.64	4836.86	3494.23	7562.69	7959.51	9883.8	28252.8	5073.61	8946.26	8243.4	9952.53	6102.84	4915.85	8606.56	7749.27	7099.19	10510.7	12214.7
Canada	164871	162297	175801	171448	186999	189334	290548	241990	244503	200750	210461	227414	252519	264324	247765	259495	262688	309913	313709	303165	296020
Cayman Islands	109.684	118.904	131.158	166.054	257.268	521.899	2917.76	4724.43	3312.48	3361.35	1336.15		1507.25	450.555	459.967	176.488	143.487	188.521	265.968	256.696	241.503
Central African Republic	2449.56	2174.86	1792.15	2181.72	579.461	418.635	710.387	681.123	581.815	384.726	463.257	2419	1021.38	1125.43	825.557	1022.66	1680.5	933.932	655.949	2336.3	2698.11
Chad										6325.15	3130.46	4658.56	2794.42	3225.36	3672.19	3757.89	5952.12	4477.07	2240.34	2731.52	2145.64
Chile	57704.1	57546.4	61093.4	59534	62328.4	44415.3	87227.8	94977.6	90932.7	95774.1	110957	107356	116344	139069	98467.5	100887	110111	115748	111925	102906	102023
China	241021	296152	372017	480566	705707	1.27144e+06	1.99824e+06	2.27209e+06	2.04743e+06	2.47173e+06	2.64546e+06	2.83865e+06	3.43108e+06	4.03764e+06	2.25381e+06	5.07401e+06	5.02872e+06	5.18309e+06	5.70038e+06	6.28034e+06	6.36187e+06
Hong Kong	365964	423175	497771	498516	477200	347141	367001	343649	340158	307676	286109	305225	289605	249201	242498	221328	209520	204967	258082	316102	305059
Macao	8415.81	6885.69	8078.46	7736.5	11272.5	9548.54	9170.21	8736.13	8666.03	9622.59	9616.01	9412.6	11079.3	8084.96	10698.3	11844.7	9058.47	12155.8	8297.27	11941.1	10339.5
Colombia	60448.1	67148.8	68929	50381.1	46149.1	42497.7	52728.9	56738.1	47677.9	46442.6	50012.5	50973.6	54652.4	53268.5	59197.9	56033.5	54104.1	63976.9	69492.2	70235.2	65951.3
Comoros	355.878	336.151	315.383	157.794	504.259	332.764		362.579	586.313	589.708	572.904	846.317	555.984	759.401	531.532	4137.87	719.419	706.216
Congo Republic	3721.51	3579.72	4298.74	3596.49	6289.59	1370.94	3435.3	5960.77	5487.22	4993.29	5082.64	5523.32	6477.07	10828.4	9027.87	13173.3	6836.44	9241.71	9226.98	13671.1	10001.3
Cook Islands	102.274	94.691	101.928	86.4225	107.612	459.439	187.748		144.226									75.7858		69.1976	62.6255
Costa Rica	10874.4	10867.8	12481.1	14341.5	16473.8	12724.3	13511.3	14990.3	15687.7	16313	16206	18892	23691.4	20973.1	14524.7	16486.9	15058.8	20870.5	22207.8	20721.4	21340.4
Croatia	7700.05	8224.14	10201.9	8238.11	7542.9	6948.22	11596.7	16372.7	16351.4	15934.9	18317.3	17341.1	15707.7	16292.3	11209.8	13385.7	14191.6	9825.61	9510.89	9491.39	10016.9
Cuba	18668.7	20471.3	16348.9	17415.5	19511.4	8886.69	15408.7	21500.3	13677.4	15770.4	20723.3	34414.3	18644.8	28002.5	21610.9	25796.4	20048.5	21751.1	30178	31438.5	28037.2
Curacao											224.401	230.09	177.668	189.587	219.324	137.933	1897.19	1781.25	2740.93	3597.69	3166.96
Cyprus	4165.62	4115.38	3734.98	5037.88	5153.98	4686.16	19440.1	16030.8	11211.3	8894.46	7347.81	5676.74	5776.15	5927.34	4339.39	5092.73	5346.36	4776.97	4204.06	4203.38	4460.75
Czech Republic	18213.7	15873.7	14660.1	17033.9	17042.3	19066.3	26667.8	29591.4	33325.6	38336.2	37599.7	40808.2	64430.8	44018.1	44644.8	44017.3	45368.4	46017	45074.5	45146.7	47952.9
Cote d'Ivoire	26872.6	27687.8	31553.6	27805.2	38439.2	34822.8	187875	134664	137582	120555	17722.2	57179.9	90248.7	62726.2	15300.5	85230.3	110542	111955	16551.6	19779.6	22458.2
North Korea	55.0526	126.996	152.054	310.582	180.983	260.011	2713.42	1543.51		2411.2	1105.45	1293.39	805.122	651.067	362.711	588.954	450.381	465.065	401.234	682.325	689.681
DR Congo	17583.2	14986	24378.7	10807.6	7944.84	13248.1	20421.1	23582.9	32334.9	30161.5	55236.7	30184.1	60305.6	68964.8	62954.5	93813.2	55843.1	60816.6	56959.7	48032.6	45226.4
Denmark	65837.8	55788.7	38332.2	38796.6	36209.8	33185.1	64249.1	77071.5	82262.5	85913	86049.5	109068	92648.7	90620.6	72122.1	69373.8	63908.4	64365.8	60060.9	55955.5	53202.9
Djibouti	325.192	292.954	325.968	377.091	801.181	297.447	30547	31079.3	14932.8	9610.85	6765.75	6011.83	5262.7	2164.6		1199.7	3262.81	3388.6	3872.59	3168.18	3747.83
Dominica	205.278	266.106	279.211	237.449		259.025	201.439	160.608	224.623	185.653	359.647	138.695	201.677	232.362	222.306	252.672	211.762	125.283	43.1244	166.522	230.689
Dominican Republic	17711.7	18881.8	20087	16478	23386.2	20101.4	17402.3	23633.7	22687.8	17633.1	22821.8	21865.6	30456.5	24860.7	26980.1	25798.4	26672	27207.8	31855.3	30166.2	35704.5
Ecuador	18569.4	18256.7	21534.5	22378.5	14697.5	10857.7	16462.4	22038.5	19244.2	23505.2	22900	24684.7	21020.4	21351.7	21566.1	24706.9	24852.8	24361.5	24635.9	24759.8	24527.6
Egypt	81010.3	77312.3	86090.1	97300.8	130858	167524	196068	202241	76584.8	123262	149931	152619	183114	289699	138840	311145	267510	264524	173481	231024	261927
El Salvador	15769	14651.9	15825.8	13692	19143.9	17952.9	16517.5	16814.6	19334.9	16484.5	13998.2	14983.4	16551.6	16214.6	12684.7	13280.4	16210.2	13586	12922.5	12136.4	13825.8
Equatorial Guinea	19.6182	56.8084	87.4322	101.999	146.296	1165.17	2105.53	740.562	1576.21	2736.59	1282.03	1188.04	2701.84	3082.45	4249.04	3075.06		4521.32	2557.41	3185.94	2698.76
Eritrea	1224.95	1340.35	1333.79	1359.12	1348.93	1669.25	2284.08	2884.27	4689.59	4757.78	2996.62	1136.44	1429.48	974.977	1045.92	712.196	2506.75	1067.48	799.847	1004.07	951.845
Estonia	8674.85	8621.26	9066.82	14762	11172.6	13193.1	35204.6	36019.5	48156.7	59438.1	51176.7	49105.7	39255.4	16730.3	8145.87	11023.4	11165.3	11119.2	12897.9	11715.9	11486.4
Ethiopia	3603.95	4182.89	4164.6	3707.44	5120.71	7511.14	6568.16	4640.23	10057.4	7083.5	10003.2	9473.63	8927.91	19691.6	17246.9	20021.4	28518.9	12457.5	14360.4	14225.7	19645.3
Fiji	8261.38	9263.91	8614.36	11816.9	5881.84	4096.3	5131.7	5222.35	5451.37	5692.14	4127.91	4572.62	6101.97	5390.81	3466.99	4337.68	5116.5	3734.24	3497.15	3137.26	3887.84
Finland	100775	88088.2	83211.8	304251	142354	288881	537348	540327	494280	493168	509697	410631	327103	501413	44748.2	209884	218346	191679	286856	274584	283614
Netherlands Antilles	9237.01	9744.92	7514.69	6799.5	4621.51	4226.79	2101.46	2368.42	2555.48	1893.68	1815.47	1976.34	2456.51	1487.89	2002.2	1917.74	537.647	214.183
France	491457	462776	450104	426385	510358	493096	618190	637214	599299	703374	861475	501263	793942	811197	610672	604558	508895	387409	452186	438835	441588
French Polynesia	3575.58	3868.03	3319.16	3421.25	3576.87	4358.5	3690.59	3858.5	4140.31	3920.62	4179.95	6002.22	9282.14	7519.48	5382.22	3880.36	3657.84	6324.12	3057.39	2649.32	2653.71
Gabon	3797.87	5537.99	5530.89	4072.9	3687.76	2819.15	4988.33	4767.22	3646.77	3650.45	2747.24	4068.72	2371.89	4866.23	2316.18	3663.77	3156.66	4123.52	3153.62	3464.31	3094.13
Gambia									515.57	780.359	731.464	751.832			562.333	576.767	661.629	667.505	613.396	687.801	681.752
Georgia	4052.56	5328.03	7878.81	7420.86	5857.74	10952.1	8106.15	9069.18	7777.34	19132.3	17195.1	18432.3	20996.9	13318.1	8716.73	21031.7	25923.4	14240.8	16227.1	14138.3	14873.9
Germany	387436	396645	373067	365302	450886	459671	754317	689427	722873	723310	633559	697579	640447	655667	530008	564450	592520	533014	550180	550780	573157
Ghana	9497.85	9694.75	10592.4	9895.74	16002.5	10401	21976.7	25102.6	43099.6	27369.8	60154.7	63056.5	22996.3	21786.6	19924	27761.4	31782.3	43387.2	35847.5	24698.3	22950.4
Greece	32439.6	41453	40167.5	44054.8	61869.7	66103.7	103357	103886	100511	87587.9	94704.1	91299	102205	93159.9	63430.5	58803.1	75471.7	56137.3	50422.6	51503.2	48623.8
Greenland	734.965	878.528	940.66	534.679	765.098	202.611	226.169	206.092	585.664	335.329	349.363	411.314	320.293	530.597	510.486	494.304	471.387	293.815	304.706	261.044	264.116
Grenada	204.621	294.439	310.817	361.307	212.467	677.289	468.911	443.112	873.625	711.866	800.51	573.896	751.763	649.388	441.88	495.594	663.873	471.882	471.376	353.841	431.613
Guatemala	11437.4	9963.99	10577.4	12650.3	12321.1	10670.8	13166.9	15405.7	15490.3	14137.4	19559.2	15951	18961.2	17427.1	15961.8	17026.4	17113.7	18188.7	17514.2	18828.8	21414.9
Guinea	2736.55	2560.05	2800.57	3185.18	2890.72	1480.39	2883.01	3695.59	6025.25	3869.76	2702.79	5800.46	7630.77	5068.47	1930.58	3903.59	4702.5	5288.19	6730.85	6712.69	6660.73
Guinea-Bissau	963.642	558.174	360.267	216.886	343.43	329.688	623.133	568.69	167.289	741.017	747.207	635.799	629.372	696.702	684.843	804.007	685.039	553.521	931.141	760.636	820.109
Guyana	1252.48	1801.68	1432.25	1586.68	1075.77	2628.8	688.12	742.164	756.614	920.01	865.612	806.043	972.409	928.522	745.499	890.568	1010.89	1294.65	1393.38	1295.6	1597.01
Haiti	1780.93	2010.5	1820.75	1955.95	2740.37	2648.3	3562.75	4466.7	3698.67	6190.89	6228.09	7820.15	1541.09
Honduras	12392.9	12803.6	9709.67	12270.1	11149.6	18470.9	15397	15395.3	13873.6	18656	12822	12657.6	13768.8	12311	10067	8733.67	9192.38	13379	11034.8	12693.1	14381.3
Hungary	12950.6	16172.1	17379.8	27637.5	26458.8	27040.2	38510.2	43638.3	46964.6	47183	43510.4	37543.5	35593.3	37740.7	27927.9	26429	30459.4	24188.2	24287.1	27799.9	30281.5
Iceland	1966.33	2309.66	2421.02	1602.22	2963.26	2171.47	13027.1	2891.45	4154.63	4056.89	4326.12	5129.42	6417.94	4106.89	2118.95	1437.41	1479.69	1402.04	1549.01	1663.55	1820.8
India	76738.5	109675	124327	126540	160707	193185	295311	327396	322062	299374	316274	407803	479208	534015	476752	517072	617526	583453	599633	600469	613690
Indonesia	134148	148892	150302	127190	131760	205627	257923	272021	162052	212969	221262	232428	296903	395348	349894	458440	501389	379966	447247	637648	639223
Iran	66766.4	73708.2	67194.7	68769	104555	122448	120642	132505	70914.1	74986.3	112502	122929	86182.5	146462	225648	169001	130343	309957	243103	207334	219212
Iraq	2172.63	11354.9	18041.3	25929.9	39108	34630.4	34696	30272.1	54815.1	48729.6	56220.8	65991.8	31910.7	51469.6	78542.3	85163.6	81771.5	64371.1	53595.1	49959.6	50447.5
Ireland	10856.7	12209.4	13406.8	15370.4	18987.6	22958.4	53449.2	48026.9	46266	43827.7	42671.5	48023.9	48716	41847.5	33200.7	32037.6	28987.6	33209.4	34129.2	39778.8	45908.5
Israel	107942	138667	126830	103499	136778	104778	109143	116309	107156	132841	115231	129780	113680	117563	111481	152439	173802	150540	129771	114865	116678
Italy	376748	355135	354398	379104	442871	475126	680368	641979	660608	723763	664798	814668	715675	535691	401580	398353	408794	328380	344303	346836	350891
Jamaica	5701.04	5664.16	5377.11	5080.48	5079.36	8453.19	8208.36	11697.4	11959.8	19385.2	9776.98	9648.02	9022.68	11016.2	7885.07	8532.4	6349.57	7401.09	8718.49	7554.76	9873.45
Japan	1.00875e+06	1.00437e+06	903617	1.28647e+06	1.06356e+06	1.51439e+06	1.85248e+06	1.43735e+06	1.53476e+06	1.82098e+06	1.68194e+06	1.40121e+06	1.34084e+06	1.41753e+06	866341	1.07395e+06	1.05642e+06	987061	931635	861720	834009
Jordan	46456.9	46926.1	47962.7	39170.9	34251.9	42666.4	62163.9	53437.4	43577.5	48166.3	52410.6	42934	57446.1	46012.5	29955.9	52095.7	32762.6	28479.5	38249.6	41828.7	38763
Kazakhstan	21224.2	17068.3	21093.1	23441.7	17343.3	32038.6	66263.1	59344.5	55593	67102.6	71839.1	67322	68327	67454.1	32591.1	64242.4	82467	104907	94349.9	76605.3	79698.5
Kenya	16169.8	15815.9	16921.2	15587	13128.9	16714.6	27203.6	46232.7	33126.7	25879.2	30578.4	34565.4	60738.4	40920.8	55889.3	64762.3	74604.6	54484.1	48186.6	61822.7	61898.1
Kiribati	384.44	440.959	372.127	276.206	299.224	452.027		179.303	162.943	204.736		99.2814	568.046	154.475	131.014	186.76	335.829	199.349	244.614	65.0022	200.409
Kosovo	5809.13	3335.07	3469.27	2396.81	1523.86	2694.03	3665.19	3196.54	3911.88	3620.8	2665.65	2821.85	2437.99	2894.53	2632.06	3365.58	2505.92	2581.23	2570.18	2735.77	2026.45
Kuwait	76836.3	52899.9	53204.2	42845.5	53714.7	54085.2	62058.7	72944.4	162493	58480.5	73454.1	70703.2	139897	86927.9	97535.8	105293	131216	92582.5	84147.8	110083	101235
Kyrgyz Republic	4776.79	11230.9	8707.58	10929.9	1407.91	6716.48	15406.1	20389.1	22592.4	19634.7	18859.9	19511.9	22338.2	25547.4	18558.6	19027.3	27491.1	21633.1	21607.2	16795.4	14620
Laos	305.066	372.233	368.965	321.055	448.402	1409.3	1172.22	1113.92	441.062	405.641	580.696	482.06	560.687	737.104	577.961	631.622	697.022	922.738	890.554	1221.24	1259.99
Latvia	3561.12	4559.9	4716.41	5647.99	7246.66	11428.8	16372.5	22026.2	23015.5	40708.8	42281	43850.9	53984.6	30375.5	11689.4	15789.3	17668.5	25855.9	19579.4	29650.3	30152.2
Lebanon	21646.3	23789.3	25302	22339.3	31124.2	21592.8	38309.1	37654.6	34849.2	50355.8	58951.9	56021.6	58924	55694	49326.5	74595.4	69956.6	60564.6	52619.8	72635.1	78581.5
Lesotho	4659.74	5643.63	5344.91	6013.78	4066.04	6298.07	10361.9	10029.6	3292.43	3646.72	2317.38	3172.84	4224.46	2425.12	2031.53	2631.5	3570.29	2664.14	2110.74	2091.16	2611.49
Liberia	6.61914	15.8304	26.0584	24.3655	123.445	27.9161	49.255	43.4049	62.1118	122.023	160.569	665.393	468.799	591.377	243.263	247.702	447.991	408.397	541.859	827.797	585.853
Libya	58542.1	71404.9	67112.3	48651.3	18263.2	10425.8	14233.2	31224.8	28477.4	34518.9	27923.8	31003.8	44411.3	52507.8	65898.7	102567	40791.8	91944	59917.9	42569.6	44696.3
Liechtenstein				701.056	824.922				2602.58
Lithuania	6526.3	6840.99	8004.75	8509.68	5292.22	8736.68	24124.7	21734.9	19349.3	19371.7	22053.1	23785.3	26605.1	29038.8	16543	26686.2	30039.2	26005.2	28754.9	27949.4	29880.7
Luxembourg	14576.9	12320.8	13045.5	13200.6	12700.4		29747.1	24407.7	19372.3	23086.3	17600.6	20455.8	30474.5	27633.6	19666.9	27408	27849.5	19353.6	22587.1	22643.9	26234.9
Madagascar	1713.16	1720.15	1808.92	1763.94	1836.61	3719.56	2462.4	1563.62	3628.56	3317.01	3199.36	3730.2	5920.52	5503.02	2977.16	3008.83	3353.9	4274.49	3034.43	2960.86	2791.06
Malawi	9607.97	6832.91	12003.6	8439.94	18602.5	14440.7	15321	30387.4	17791.7	18672.8	18104.6	13965.5	12901.8	15485.6	18360.5	17419.4	17551.8	16967.3	21406.5	18553.5	15124.2
Malaysia	178687	217088	211914	188323	191397	272682	249080	260649	145274	158488	151408	171235	191940	182757	133264	152234	173133	186306	178232	180684	186504
Maldives							557.461	564.812	329.895	444.258	476.56	692.085	1075.23	1338.43	1356.99	1205.74	973.972	1435.69	1780.98	1605.44	1225.81
Mali	4456.22	4961.79	4952.52	4520.1	3640.42	3560.48	5515.81	5388.6	6039.53	5340.34	6256.82	7882.66	7432.84	3887.95	5377.33	4969.51	5889.14	8785.15	6247.68	9651.28	9510.11
Malta	2971.46	2440.34	2189.87	2545.81	3012.51	2311.61	5993.77	5695.37	4395.93	2976.9	2516.74	2445.16	2826.98	3228.16	3627.97	2836.36	2521.98	3939.41	3953.82	3242.36	3620.28
Marshall Islands	78.0507	65.5504	59.6142		42.578	23.863	34.3566	31.2556	23.7784	21.1166	61.7657	20.5973	12.8004	9.67733	11.58	11.5439	10.0581	12.5743	8.54972	9.43556	8.36757
Mauritania	3017.53	3318.66	3316.37	2487.11	1291.56	1338.43	3257.92	4373.51	8174.72	6633.7	3966.22	22423	6612.96	5873.94	4386.64	4710.81	7642.77	7489.89	5980.61	4686.68	3962.58
Mauritius	29843.6	52763.4	43551	46740.7	59812.5	90956.8	111504	85982.3	30145.8	71179	114081	32272.8	24955.4	58465.6	27141.2	44036.9	42916.8	57122.9	72950.3	70100.5	52705.9
Mexico	113757	134729	163636	279302	182195	342155	396673	314312	290567	309221	324930	337474	348956	351508	269400	276512	293058	289614	282702	292374	298050
Micronesia, Fed. Sts.	395.757		478.343	466.382	436.193	370.971	540.849	465.137	622.926	492.576	437.429	3600.05	2598.12	962.81	347.467	428.367	341.954	355.597	351.43	246.747	277.231
Monaco																				1684.31	1194.98
Mongolia	2077.47	2151.22	2093.69	2841.29	1799.01	5276.71	11017.7	13235.3	7634.21	11352.4	12484.4	10609	8491.64	11785.8	3342.77	8591.43	9077.39	7401.42	7598.2	8311.43	6073.05
Montenegro	447.288	383.487	399.689	283.222	251.863	314.354	1621.21	1726.61	868.056	1988.36	1526.06	2547.35	2862.5	3511.38	2401.59	2390.8	2452.57	2454.85	2391.78	2380.61	2660.71
Montserrat	57.9245	59.9825		45.6667	12.5089	40.5094	32.9825	51.1631	60.6956	70.3749	13.5653	25.6524	40.5404	47.3338	17.6893	16.3948	13.211	22.7345	23.107	24.824	33.6247
Morocco	16249.2	17141.9	18932	16133.7	17850.6	19698.3	50673	76156.4	50962.3	65795.6	66926.9	64196.4	83673.5	75228.9	67470.7	68960.9	65495.8	57091.7	53830	63093.4	57721.4
Mozambique	5959.53	5223.94	5372.19	4918.85	26370.9	35776.6	65512.3	38063.3	34754.3	23707.8	35774.2	21429.5	17881.5	21824.2	17233.5	20195.9	29520.6	54950.9	67962.1	47577.5	48427.5
Myanmar	2315.28	1897.85	1856.28	2884.55	2515.23	1512.05	2443.89	2128.72	1556.54	1445.46	1692.91	2606.97	2890.62	2263.01			3355.77	3493.56	6173.85	7937.28	9450
Namibia	5661.77	7233.94	6871.12	7670.93	5639.72	8663.4	23803.1	17671.5	8683.84	8461.7	5369.42	6365.12	11157.1	6832.24	7304.5	7285.1	9827.72	8036.59	7325.92	7754.66	8730.29
Nauru		263.67	199.367	116.53	130.054		199.797		182.773			58.5254	44.5938	64.9643	56.4543	153.595	155.221	80.6964	228.377	342.024	510.332
Nepal	3239.59	3206.6	3765.71	4309.18	3987.85	3788.73	4299.66	3696.26	3974.68	4339.93	4293.98	5110.63	4804.88	4139.31	3581.73	6004.12	5445.6	6586.41	7710.16	9462.02	9136.44
Netherlands	194925	222509	213497	222638	233812	239322	409242	332182	345668	358167	357137	338053	330735	352201	322232	308734	306474	289117	310860	313980	324835
New Caledonia			2531.65	2046.71	2181.91	3008.52	2827.4	2915.44	3290.47	2973.72	3457.87	3456.4	5296.38	5199.04	4404.54	5980.73	4834.37	3780.84	4550.35	3804.79	3780.02
New Zealand	39815.9	42936.8	41807.5	28736.7	38728.6	37191.9	60769.3	64511	62102	58116	66286	56355.8	70532.1	57736.8	49819.4	53866.2	43756	43324.4	46272.6	48659.9	48879
Nicaragua	3559.84	3432.75	3990.36	4292.47	3859.04	3461.49	4573.67	4092.25	4038.33	3143.04	2360.15	4028.27	4085.64	4129.73	3819.5	4360.95	6364.43	7231.74	9254.03	6147.55	7775.49
Niger	5832.11	6140.04	6424.87	5557.04	4174.42	5328.09	14984	5897.14	8833.07	10175.5	6294	4728.35	2945.65	4225.91	6214.52	17561.2	11257.8	17735.2	10583.5	11552.5	10914.1
Nigeria	51126.5	51864.1	56504.3	44992.9	29047.9	53263.5	124970	108947	137062	91455.8	98588.3	98095.3	135492	142293	143765	162526	301732	134430	137404	133199	121575
Norway	42701.6	52127.5	57363	86736.3	59931.9	88253.9	108300	108681	85086.1	86367.4	88564.2	83777.3	76019.5	82944.5	55602.8	68885.7	83345.3	98117.9	85772.6	76447.3	71709.3
Oman	18283.7	12506.6	14870.1	15935.1	14529.9	16452.1	16591.9	12043.3	17721.6	13811.1	17569.3	18616.6	40668.5	46044.2	18696.7	20849.7	18457.2	17493.6	17105.2	24961.9	21815.3
Pakistan	40607.8	41745.9	39239.2	44663.3	39006.4	34695.4	32630.4	40731.2	42267.4	46679.8	58621.3	66033.6	63763.6	94455.7	48460.2	50309.4	52306.6	54352.7	82840.9	76728.4	83513.6
Palau	780.912			450.942		307.236	48.0887	30.6538	19.3284	10.8041	288.925	222.549	286.856	317.549	437.137	214.347	187.532	218.53	170.376	224.469	302.265
Panama	8647.9	7648.67	7879.74	8250.81	6928.3	9825.46	7695.19	7723.72	6191.4	5811.47	7106.5	8375.75	8914.19	9561.57	9424.36	9798.49	9305.35	13258.5	12732.5	14617.6	15915.5
Papua New Guinea	13078.5	17095.6	16029.1	41818.6	10233.4	6450.25	8373.16	8375.21	7795.56	6915.58	5498.25	6624.43	7621.78	7557.72	7494.15	10351.8	10545.9	14005.3	8608.74	6927.56	6518.26
Paraguay	16545	15080.6	14643.8	11948.5	11220.2	10135.8	9826.6	10724.4	9069.62	10542	9316.55	9279.54	9304.89	12879	11722.4	13073.4	13173.2	14436	18974.2	23582	23367.4
Peru	41815.6	45436.1	47081.4	36088.5	33637.8	31220.5	46491.7	57196.1	56261	60054.9	58779.5	63721.4	72538	70855.8	49731.2	57060.7	56293.2	77389.1	112016	111995	97749.1
Philippines	120896	166840	203017	161946	181349	184639	131989	154664	91937.1	84246	77013.2	131647	82775	78471.8	65002.1	78275.7	90656.2	100567	92349.1	109514	124737
Poland	20516.3	25475.2	28083.9	33680	38270.1	49475.7	98772.4	81686.4	74862	83307.2	97899.5	96515.2	108000	112005	83047.5	93374.4	94419	91160.3	86976.7	103681	113961
Portugal	95091.3	198962	326636	130606	527224	477633	769471	622024	354721	463880	355972	471234	265505	286346	202243	176863	156720	122941	144406	126269	127290
Puerto Rico	91252.5	92976	89465	86271.4	95804.6	77416.1	111847	103705	101469	126615	112606	92525.2			104257			80299	62832.3	60144.9	89771.7
Qatar	10727.6	7836.56	9000.03	5801.37	4984.92	30459.5	51092.5	11413.8	36163.6	10806.9	17293.8	50774.3	31653.4	30288.5	34412.2	49088.3	72869.5	87255	74152.4	74732.8	78416.7
South Korea	416848	479806	460021	578294	481535	917393	636594	673463	583319	657936	619748	735221	690268	680185	460661	640200	695822	630763	668687	638746	626036
Moldova	1435.92	2078.94	2769.16	1874.96	1322.03	2078.79	4786.29	5451.83	11988.3	9754.58	7244.85	6120.9	7365.79	7148.12	4877.45	5446.86	6005.74	5907.04	6270.25	7253.11	8131.53
Romania	9112.87	7735.49	8375.53	8048.04	7847.78	9198.89	25594	32097.1	51615.2	44127.5	42293.1	40400.6	35256	33138.7	28653.5	30131.3	28341.5	30122.1	28468.7	30471	32342.9
Russia	467461	359117	369703	269773	353854	384405	605561	495592	492200	618325	564736	655028	551067	676212		568445	685842	620450	552343	551421	350093
Rwanda	6327.74	8132.97	11174.9	4873.94	4992.69	2950.74	2773.6	7989.6	3907.28	4591.05	7398.95	4134.93	6945.78	7479.6	9851.37	9212.59	12139.1	15303.3	11969.9	12091.9	11767.3
St. Kitts and Nevis	138.058	160.098	148.013	180.19	90.0038	242.656	221.006	203.677	369.994	411.659	187.768	336.162	250.307	292.248	355.383	200.409		150.29	280.189	194.853	241.768
St. Lucia	804.048	1697.36	1714.5	719.187	366.661	1079.46	364.931	370.075	1049.88	959.475	884.824	602.031	777.587	475.573	265.625	570.098	544.149	383.155	615.449	346.579	450.798
Samoa	435.509	472.289	455.615	459.018	487.516	328.06	260.007	884.651	246.14	248.733	245.403	233.655			440.465	448.616	804.559	359.3	357.302	313.988	568.798
San Marino									1522.59	1866.24	1302.28	9538.24	3259.4	3356.46	1401.47	1325.92	1165.32	1496.55	654.417	543.076	534.919
Sao Tome and Principe	121.888	158.39	108.729	67.2081	88.3162	159.201	98.0408	237.917	222.169	446.559	101.494	210.618	61.327	170.246		596.45	173.423	141.162	222.924	206.864	228.343
Saudi Arabia	54908.5	67302.1	67381.3	45677.9	273207	298786	202786	444899	404898	341519	392679	630340	627510	465727	377747	444261	411894	238417	253494	241931	229775
Senegal	6953.21	8338.49	8698.82	8051.62	12322.8	8461.42	45590	96570.2	38462	48660.1	75896.2	62298.5	94563.9	91028.9	10075.3	68334.8	40726.8	56247.6	10255.2	10011.3	9045.92
Serbia	10675	25496.7	26876.3	19643.7	10797.4	2639.9	10268.8	14007.5	9120.23	20957.7	13668.8	24110.3	17433.5	27275.6	14864.8	18229.9	16163.1	15123.8	20162.9	12416.5	13695.8
Seychelles	1773.86	2561.82	2547.49	2566.21	2323.96	1097.14	2353.93	2383.68	2374.3	1278.68	1277.6	2794.61	991.634	1105.37	1462.34	1604.12	1500.42	1794.72	2843.96	3287.2	3333.52
Sierra Leone	224.532	325.364	129.797	117.044	405.093	463.188	714.312	734.34	700.447	810.43	787.695	907.01	1198.69	932.764	919.992	844.554	1460.95	1381.27	1901.93	2872.78	2338.95
Singapore	105890	112952	111956	111762	104710	116753	141105	133071	126586	129114	142232	159338	147298	146955	120423	146201	150585	231131	154282	145031	153804
Sint Maarten											1.09325	5.02609	20.0916	0.234317	1.31965	11.6717	1135.36	1534.72	1509.99	1409.08	1374.42
Slovakia	9305.8	9010.7	9921.78	9405.28	7639.41	8913.44	18535.2	13662.9	19598.7	16073.6	17752.9	19985.9	22839.3	24461.2	17116.3	19157.9	21942.9	22336.1	22194.6	20850.8	22628.2
Slovenia	7364.72	7123.28	6678.2	8398.22	10868.5	11282.3	12497.5	11663.4	20096.6	39644.2	38785.1	69362.7	50478.2	29908.1	33093.4	20533	16472.8	15960	15921	13653.8	14158.4
Solomon Islands	693.455	883.421	858.885	820.946	522.355	736.346	1131.58	575.047	186.472	250.789	457.863	385.303	699.025	480.406	530.861	1080.99	1173.8	545.564	2051.5	1802.29	2257.36
Somalia	201.36	259.296	323.891	243.61	308.905	420.681	1652.93	1086.09	2365.25	2388.43	1801.12	2243.85	1091.75	787.917	570.541	293.381	212.487	171.525	322.33	245.173	245.313
South Africa	47084.2	58278.7	56088	62847.6	44781.8	94421.6	336636	333108	115278	138999	99880.5	125601	170111	96749.9	71734.9	83919.5	131521	100888	87003.2	81162.7	99945.4
South Sudan																	72.3771
Spain	177132	200078	209721	230636	263754	278564	316922	514151	363431	357283	352853	315794	301934	296224	232482	221429	241569	240641	220746	209210	217407
Sri Lanka	18672.3	18029.5	20583.3	25363.6	21896.4	24578.3	19735.7	19482.8	13524.3	15436.7	13622.6	15168.1	14047.7	16318.6	13161.9	16360.8	27338.6	26336.8	47931.2	23878	28938.8
St. Vincent and the Grenadines	222.9	230.869	252.01	273.214	224.93	356.8	237.805	238.786	358.21	896.275	676.612	351.411	794.748	399.559	473.653	430.26	255.518	380.162	350.617	438.103	470.99
Palestine	7387.8	6191.51	6678.67	6871.14	10414.1	34985.8	84953.9	41127.8	63370	18966.3	14177.4	7525.16	3484.71	5590.72	3343.1	4233.79	4969.9	5871.54	5801.95	6311.76	6217.54
Sudan	2693.92	2714.91	4475.35	5370.31	4290.21	11445	10713.8	17913.7	10787.8	9087.98	22611.4	20610	16155.3	13675.8	19093.6	30631.8	30319.8
Suriname	889.462	1089.2	868.572	961.734	473.426	1045.12	615.329	817.282	734.504	888.604	771.101	676.44	1115.33	856.018	1140.89	897.073	813.9	760.761	734.644	838.759	1022.43
Swaziland		4780.46	4751.39	5437.22	4174.74	7061.69	8117.15	11131.1	4597.73	4259.89	2756.63	2750.06	3955.8	2289.2	2017.15	1799.5	2707.61	2560.57	2063.03	2115.61	2628.09
Sweden	66367.4	65862.4	64672.4	140078	57222.7	202457	97307.5	88428.9	195539	216969	192757	158222	166303	178714	93538.5	136231	147937	137260	167376	171546	182142
Switzerland	36143.7	39430.3	31587.6	27304.1	34802	25655.3	73779.7	77485.1	67908.4	61848.6	58288.7	63063	55703.2	62758.7	48894.4	50010.4	63263.1	57851.5	69564.1	53422.5	54367.5
Syria	9629.62	11687.9	10612.7	11873.8	19006.4	21659.1	35120.8	41465.5	58753.1	42733.5	46997.1	38480.6	37812.1	60825.4	52144.5	45088.7	35214.1	24164.9	30298	20576.9	20043
Macedonia	3349.22	2753.23	3098.7	3025.49	2266.64	3295.11	5102.84	6046.84	5641.08	7344.83	5043.49	4410.87	5231.36	4920.61	5292.83	4743.06	4603.54	4382.49	4162.83	4646.74	4834.56
Tajikistan		7537.8	8783.38	9471.42	1641.71	9975.97	35933.5	26732.2	18650.5	26524	30465.3	22233.2	26460.4	18773	14886.8	16324.6	36435	23647.3		24619.9	22020.7
Thailand	73011	75375.7	66237.5	51575.2	106812	114315	131994	144333	128304	138495	262329	156203	153171	166499	119557	131404	139180	163940	173472	161063	151357
Timor-Leste	327.667	378.323	319.867	511.61	691.569	13818.5		1141.41	1327.13	962.533	1135.84	1775.65	2286.84	1942.88	3632.32	2416.63	391.494	528.357	3197.15	582.546	479.549
Togo	3675.66	4157.87	4040.4	5516.47	3370.16	2748.94	3048.58		7496.94	6578.27	4271.91	2817.14	1824.56	2010.26	2109.15	2186.5	2143.14	1900.77	2786.36	2187.72	2287.57
Tonga	604.191	695.185	538.491	544.36	439.617	395.742	242.195	189.645	152.016	97.8356	85.0375	70.4673	218.026	84.0158	164.715	112.844	318.146	169.807	136.76	117.616	239.262
Trinidad and Tobago	8314.55	12877.9	16147.7	11747.8	6646.43	7241.97	6514.31	10329.8	8734.03	7651.94	8587.49	8879.41	10169.1	9052.63	6551.86	6960.62	7883.3	8108.23	9554.37	10123.9	15161.5
Tunisia	9959.5	9103.52	9278.87	8294.55	8039.42	12129.8	28590.4	55550	28203.4	31309.6	33721.9	29113.1	63555	46752.6	24223.3	34291.1	35338.4	27005.3	31151.2	28586.8	27175.4
Turkey	91769.1	133673	142676	187929	138771	214350	167255	213353	220570	293541	285298	304129	330424	364442	201054	308243	408672	382813	338328	309276	309530
Turkmenistan	10968.2	11320	9027.29	8635.07			23830.8	28230.6	26021	14985.2	11179.8	11393	25714.7	26321.5	20092.2	18922.1	21509.1	17932.1	21673.2	29102.9	21524.7
Turks and Caicos Islands	224.561			170.066	218.614	276.011	595.543	597.943	435.577	4027.83	5100.73	5423.31	9728.65	14608.3	9452.35	5924.87	1809.88	3729.27	2004.07	1880.72	1329.09
Tuvalu			11.1271	23.285		53.1413			13.6693	17.4583	19.0504	4.04232	90.1696	12.6504	24.5419		16.9283				17.0419
Tanzania	17757.5	19798.4	17719.8	17427.9	22451.6	13276	14149.6	22626.4	14697.8	18781.8	17975.9	16932	24835.9	23347.2	14568.2	26375.5	25993.7	33493.8	34118.5	35380.3	26526.9
Uganda	9172.83	12540.9	8628.63	9564.79	8930.61	8086.47	10679.4	13451.3	12246.5	11679.8	13471.6	13611.2	13139.1	13662.8	16540.1	16122.5	20354.4	14634.9	14766.2	16192.6	17535.7
Ukraine	47783.8	31047.2	33326.8	36537.6	28322	51593.4	77299.5	71333.7	150386	110975	83868.7	78726.6	78315.4	97942.3	41133.6	65800.7	82690	81172.8	74439.5	56190.3	40174.8
United Arab Emirates	101957	105777	116916	95784.9	105197	127391	110352	116649	116804	141450	148790	137733	174768	173235	159466	178855	180289	181149	191925	195793	200072
United Kingdom	411902	431967	454397	440300	487178	442387	540018	505825	490548	486093	588939	588532	488147	442284	338197	379399	320637	302943	314577	316909	320897
United States	1.21947e+06	1.29878e+06	1.29974e+06	1.30144e+06	1.69176e+06	1.55529e+06	2.22589e+06	2.07699e+06	1.99137e+06	2.06431e+06	2.07936e+06	2.05318e+06	1.94913e+06	1.79199e+06	1.5364e+06	1.59192e+06	1.4102e+06	1.51689e+06	1.69607e+06	1.89738e+06	1.94796e+06
Uruguay	11293.2	22762.1	22501.5	11860.6	18323.9	19800.2	19065.3	20268.5	19018.6	32158	54086.7	59010.4	39781.3	47706.3	34775.8	37265.7	45193.5	48920.3	61758.7	54282.1	49916.9
Uzbekistan	27713.9	43246.4	42398.7	41868.2	8993.23	43523.2	53418.1	33112.9	27995.9	37960	42899.2	41379	60359.8	60321.2	28503.4	39021.4	73548.1	46147.6	43344.2	51539.1	53828.5
Vanuatu	481.606	487.206	422.851	308.971	313.718	498.219	229.035	210.129	292.862	181.267	187.388	239.185	425.247	194.147	361.787	256.194	494.085	250.988	441.829	159.324	269.65
Venezuela	31577	30395.5	35978.6	31363.2	27266	27464.1	69412	44170.1	32887.1	99371.5	87098	117708	179351	230367	221155	202254	120707	264194	310189	424213	339288
Vietnam	7532.68	10843.1	12069.1	17246.3	15978.9	24191.9	66511.3	78055.8	67635.2	80149.6	83262	89701.6	151582	132036	137409	139965	172933	156619	209912	329188	396903
Yemen	9417.15	12395.2	12836	11939.7	12740.5	16498.8	18384.4	19144.4	23082.2	30867.8	50288	61829.1	59479.5	57643.7	29234.6	42274.3	44556	47927.5	47311.8	43561.4	34754.8
Zambia	23950.6	31616.4	31777	31493.4	14094.6	12087.5	19532	24453.5	37219.1	13148.2	16249.6	17169.8	17463.2	17658.7	18408.9	18666.8	17312.9	22365.9	28771.5	24606.7	30086.7
Zanzibar	240.463	272.354	247.82	238.402	297.473	285.615	792.16	522.36	758.952	656.641	758.844	913.296	657.19	744.849	626.447	908.805	620.483	1028.02	1277.61	1323.15	708.613
Zimbabwe	15875.9	16573	24523.4	5533.53	31626.4	11007.9	17027.1	25400.8	33324.9	35706	32344.7	31578	21006.1	38052.6	57180.3	39573.4	69737	46965.7	69547.9	67586.9	47339.7
Taiwan	595448	641254	644961	677269	393176	834050	333800	337738	371431	444021	434273	424556	862133	379002	315166	376374		374747	375187	316466	1.21302e+06
World	1.05707e+07	1.12471e+07	1.15049e+07	1.2112e+07	1.28524e+07	1.54746e+07	1.99758e+07	1.99427e+07	1.83885e+07	1.98757e+07	2.0064e+07	2.04974e+07	2.15323e+07	2.18074e+07	1.54745e+07	2.06605e+07	2.0765e+07	2.06168e+07	2.14218e+07	2.24711e+07	2.3256e+07

## Sheet: land_imports_growth
Country Name	1995	1996	1997	1998	1999	2000	2001	2002	2003	2004	2005	2006	2007	2008	2009	2010	2011	2012	2013	2014	2015
Afghanistan	N/A	1	1.00901	1.02942	0.468923	N/A	N/A	12.3429	9.71068	7.69772	6.73679	7.15933	8.87492	11.2917	7.24835	5.97529	7.93392	7.58467	5.67071	7.53126	6.11633
Albania	1	1.26061	0.952741	1.30698	1.61876	1.70609	3.3703	7.9193	7.55299	9.29236	9.55727	10.7671	11.4107	9.42516	6.70237	7.90977	9.39691	5.7942	6.36931	5.69327	5.83194
Algeria	1	0.987455	0.964281	0.867574	0.900604	0.749116	1.11095	1.99304	1.37443	1.56039	1.48886	1.15816	1.24428	1.53044	1.28007	1.00961	1.40959	1.3063	1.32501	1.48597	1.38955
Andorra	1	0.924692	1.04443	1.07067	1.04491	0.925479	0.868019	0.98062	1.05073	1.36362	1.345	1.65393	2.44304	1.60646	1.24001	1.83105	1.64099	1.39442	1.08128	1.12824	1.08719
Angola	1	1.03098	1.27021	0.88447	3.79823	4.1392	18.8424	21.5798	20.5343	15.9935	23.6118	16.5285	23.5543	33.1873	38.6539	27.7809	26.8591	35.5335	66.5044	85.17	34.9676
Anguilla	1	1.60275	1.28723	1.68494	0.449216	1.41154	0.738894	1.07151	0.671297	N/A	0.676764	1.57969	1.25334	1.66671	0.966133	1.42517	0.59138	0.570932	0.764424	0.850812	0.750398
Antigua and Barbuda	1	1.11789	0.86436	1.1827	0.302935	0.696225	0.574067	1.21377	1.33473	2.25055	0.802312	0.75369	0.88684	0.938651	2.0368	2.31496	1.20434	3.39371	0.741209	0.800121	0.888818
Argentina	1	1.12953	1.21792	0.922815	0.732396	0.661382	0.858933	0.400676	0.565924	0.69358	0.616007	0.646952	0.905899	0.879879	0.720567	0.567865	0.797297	0.598248	0.860688	0.810988	0.822232
Armenia	1	1.47479	1.83367	1.83444	1.44891	1.69901	2.35512	5.0481	2.52448	2.66914	2.82475	4.811	6.42795	5.44075	1.91281	5.69734	6.64006	3.95398	3.81406	3.77733	4.32947
Aruba	1	1.27681	1.17884	0.637085	1.32057	0.94764	0.834452	0.5648	0.487544	0.620963	0.533465	0.496603	0.53843	1.7827	2.44733	3.2748	1.31817	0.793135	0.626326	0.473428	0.452912
Australia	1	1.13021	1.10106	0.984566	1.33762	1.11322	1.59539	1.83553	1.56944	1.84592	2.17505	2.07429	2.38373	2.30678	1.97194	2.17045	2.3503	2.08528	1.97891	1.91558	1.9986
Austria	1	0.871579	0.826629	1.16047	1.09753	1.3822	1.26342	1.34074	1.34349	1.39336	1.2794	1.23897	1.21218	1.15016	1.11289	1.28618	1.26046	1.21206	1.35859	1.27409	1.26259
Azerbaijan	1	1.28609	1.52454	1.8699	2.90233	2.32122	3.2724	3.50513	4.12748	6.02713	3.33901	3.794	4.0744	2.83698	2.00183	5.92348	7.44451	4.79114	6.60036	6.39814	7.88375
Bahamas	1	0.991206	1.15949	1.42269	1.01811	1.01353	1.26094	0.952907	0.842505	0.945345	0.810506	0.937919	0.802782	0.789893	0.954333	0.787938	0.684458	1.02498	1.10344	1.01187	0.892965
Bahrain	1	0.69934	0.697657	0.455586	0.596676	0.770676	0.964628	1.10651	0.705337	1.21208	0.979694	0.684753	0.683972	1.93522	2.09817	1.91491	1.48544	1.34386	0.769106	0.796876	0.705911
Bangladesh	1	1.05448	1.06433	1.09147	1.01828	0.858151	1.16194	1.49713	2.09324	1.48715	1.64311	2.3981	2.82725	1.69289	2.2153	2.1601	2.50387	2.08186	2.43066	2.47914	2.92924
Barbados	1	1.58792	1.74503	1.26048	0.825281	1.10491	1.15702	1.28611	1.73099	1.7276	1.35111	1.26931	1.21859	1.43253	2.6301	1.6683	1.56144	1.97231	0.890733	0.811667	0.946672
Belarus	1	0.904984	1.06607	1.39115	1.57721	1.77666	0.835627	1.36951	1.42432	1.86349	1.18725	1.43594	1.30705	1.20607	0.351844	1.09422	0.997685	0.905061	0.946461	1.09241	1.05457
Belgium	1	0.819619	0.666412	0.851013	0.63988	0.559854	0.821362	0.698126	0.641822	0.669288	0.625378	0.598089	0.921903	0.928225	0.74493	0.932057	0.94294	0.883817	0.89054	0.854223	0.87162
Belize	1	0.930145	0.965357	1.22547	1.62839	1.33707	1.49148	2.88118	3.48739	1.44436	1.23521	1.91838	1.82394	4.14048	3.98759	1.73778	1.82035	1.11822	1.49986	1.50061	1.89518
Benin	1	0.895673	0.67956	0.635011	0.796346	0.502895	0.423279	0.537183	1.01384	0.471175	0.402696	0.415231	0.549286	1.04892	0.535397	0.486015	0.311096	0.293529	0.549158	1.14338	1.05214
Bermuda	1	0.505476	0.586555	0.709013	0.548234	2.96424	8.61394	15.6154	2.0712	1.01421	N/A	0.463718	0.384152	0.368394	0.363452	0.261778	0.270322	0.256392	0.312095	0.310784	0.296735
Bhutan	1	1.60305	1.67843	1.01849	1.48755	0.119682	0.581482	1.13477	1.39122	0.967779	1.45737	2.20557	2.15744	1.65762	2.30429	1.93983	2.49921	2.21527	1.02813	1.68495	1.60423
Bolivia	1	0.991082	1.12764	1.3234	1.57842	1.50311	1.6492	1.885	1.80284	1.80359	1.77139	2.09458	1.5894	1.87283	2.48206	2.67602	2.0306	1.97436	2.62898	3.37969	3.53957
Bosnia and Herzegovina	1	1.67974	2.04362	2.4491	2.63483	3.08866	4.85394	5.46893	4.5858	5.66373	6.42808	3.9751	3.75369	4.51353	3.75464	4.48921	4.01386	3.76687	3.49943	3.99837	4.05765
Botswana	1	1.05205	1.29208	1.60246	1.15282	1.36125	4.14976	4.0097	1.31037	1.58633	0.90313	0.910315	4.7258	0.960902	0.884693	0.98467	8.99643	1.23224	1.01647	0.860695	4.8058
Brazil	1	1.16902	1.21604	0.917208	0.769958	0.891322	1.20096	2.13625	1.5117	1.37755	1.50366	2.0607	1.55645	1.62195	1.43786	1.49654	1.83043	1.54769	1.72809	1.83971	1.4775
British Virgin Islands	1	1.02589	N/A	N/A	N/A	5.18424	9.83381	4.08218	2.71136	2.47092	1.37578	0.730829	0.948994	0.690642	0.714173	0.621735	0.494655	0.356363	0.288524	0.359537	0.374073
Brunei Darussalam	1	1.17778	1.08031	0.834559	1.32534	0.643194	1.35082	2.01357	1.05786	0.513749	0.236618	0.474698	0.413408	0.281089	0.416476	0.17308	0.53031	0.832221	0.931211	0.697302	0.735913
Bulgaria	1	0.847282	0.733488	0.981219	0.874724	0.885953	2.10351	1.98118	1.86215	2.71058	1.91699	2.07255	2.43116	2.87326	1.78812	1.7985	2.11923	1.95157	2.49338	2.16083	2.29436
Burkina Faso	1	1.0543	1.03842	0.880618	0.500696	0.268857	0.450723	1.2055	0.491627	0.543304	0.573905	1.59263	0.523421	0.371136	0.448975	0.51744	0.960153	1.4234	0.541834	0.88714	0.665263
Burundi	1	0.488883	0.48171	0.32158	0.469699	0.82719	1.78109	1.93792	2.55405	1.38088	1.58754	1.50521	2.33824	1.50784	3.98204	1.19283	4.87645	3.02591	2.1315	1.79337	1.65001
Cabo Verde	1	1.22275	1.30905	1.0349	2.19484	0.820763	1.00255	1.26819	1.56431	1.47862	1.71673	1.62183	1.31006	1.8617	1.06273	1.0912	1.027	1.24519	1.85136	1.17054	1.09278
Cambodia	1	0.755497	0.86904	2.36146	2.54088	3.2197	3.62393	4.46751	3.43695	4.83769	3.41886	4.3829	4.53544	4.09512	3.58631	3.39826	3.56258	3.85118	4.27267	4.89627	5.88225
Cameroon	1	1.09274	1.16672	0.963773	2.72349	1.9675	4.25833	4.48176	5.56527	15.9083	2.8568	5.03737	4.64161	5.60397	3.43633	2.76797	4.8461	4.36338	3.99734	5.91827	6.87774
Canada	1	0.984388	1.06629	1.03989	1.13421	1.14838	1.76227	1.46775	1.48299	1.21762	1.27652	1.37934	1.53162	1.60321	1.50278	1.57393	1.59329	1.87973	1.90275	1.8388	1.79546
Cayman Islands	1	1.08406	1.19578	1.51393	2.34555	4.75822	26.6016	43.0732	30.2003	30.6458	12.1818	N/A	13.7418	4.10777	4.19358	1.60906	1.30819	1.71877	2.42486	2.34033	2.20181
Central African Republic	1	0.887857	0.73162	0.890659	0.236557	0.170902	0.290006	0.278059	0.237518	0.157059	0.189118	0.987522	0.416964	0.459441	0.337022	0.417488	0.68604	0.381265	0.267782	0.953762	1.10147
Chad	N/A	N/A	N/A	N/A	N/A	N/A	N/A	N/A	N/A	N/A	N/A	N/A	N/A	N/A	N/A	N/A	N/A	N/A	N/A	N/A	N/A
Chile	1	0.997267	1.05874	1.03171	1.08014	0.769709	1.51164	1.64594	1.57585	1.65975	1.92287	1.86045	2.01621	2.41004	1.70642	1.74834	1.90821	2.00589	1.93964	1.78334	1.76804
China	1	1.22874	1.54351	1.99388	2.92799	5.27523	8.29072	9.42693	8.49482	10.2552	10.9761	11.7776	14.2356	16.7523	9.35112	21.0522	20.8643	21.5047	23.651	26.0573	26.3955
Hong Kong	1	1.15633	1.36017	1.3622	1.30395	0.948565	1.00284	0.939025	0.929485	0.840728	0.781795	0.83403	0.791349	0.680945	0.662627	0.60478	0.572515	0.560074	0.705211	0.863752	0.833577
Macao	1	0.818185	0.959915	0.919282	1.33944	1.1346	1.08964	1.03806	1.02973	1.14339	1.14261	1.11844	1.31648	0.960687	1.27122	1.40744	1.07636	1.4444	0.985915	1.41889	1.22858
Colombia	1	1.11085	1.1403	0.83346	0.76345	0.703044	0.872301	0.938625	0.788742	0.768307	0.827363	0.843263	0.904121	0.881227	0.979319	0.92697	0.895051	1.05838	1.14962	1.16191	1.09104
Comoros	1	0.94457	0.886212	0.443395	1.41694	0.93505	N/A	1.01883	1.64751	1.65705	1.60983	2.37811	1.56229	2.13388	1.49358	11.6272	2.02153	1.98443	N/A	N/A	N/A
Congo Republic	1	0.961901	1.15511	0.966405	1.69007	0.368383	0.923092	1.60171	1.47446	1.34174	1.36575	1.48416	1.74044	2.90968	2.42586	3.53979	1.83701	2.48333	2.47937	3.67355	2.68743
Cook Islands	1	0.925856	0.996621	0.845009	1.0522	4.49223	1.83574	N/A	1.41019	N/A	N/A	N/A	N/A	N/A	N/A	N/A	N/A	0.741008	N/A	0.67659	0.61233
Costa Rica	1	0.999393	1.14775	1.31883	1.51491	1.17011	1.24248	1.37849	1.44262	1.50012	1.49029	1.73729	2.17864	1.92866	1.33567	1.51611	1.38479	1.91923	2.0422	1.90552	1.96244
Croatia	1	1.06806	1.32491	1.06988	0.97959	0.90236	1.50605	2.12631	2.12354	2.06946	2.37885	2.25208	2.03995	2.11587	1.45581	1.73839	1.84305	1.27604	1.23517	1.23264	1.30089
Cuba	1	1.09656	0.875742	0.932874	1.04514	0.476022	0.82538	1.15168	0.732642	0.844753	1.11006	1.84343	0.99872	1.49997	1.1576	1.3818	1.07391	1.16511	1.61651	1.68403	1.50183
Curacao	N/A	N/A	N/A	N/A	N/A	N/A	N/A	N/A	N/A	N/A	N/A	N/A	N/A	N/A	N/A	N/A	N/A	N/A	N/A	N/A	N/A
Cyprus	1	0.987938	0.89662	1.20939	1.23727	1.12496	4.6668	3.84836	2.6914	2.13521	1.76392	1.36276	1.38662	1.42292	1.04171	1.22256	1.28345	1.14676	1.00923	1.00907	1.07085
Czech Republic	1	0.871526	0.804896	0.935223	0.935688	1.04681	1.46416	1.62468	1.8297	2.1048	2.06436	2.24052	3.53749	2.41676	2.45117	2.41672	2.49089	2.52651	2.47476	2.47872	2.63279
Cote d'Ivoire	1	1.03034	1.17419	1.03471	1.43043	1.29585	6.99133	5.01121	5.11979	4.48618	0.659488	2.12782	3.35839	2.33421	0.569373	3.17165	4.11355	4.16614	0.615931	0.736053	0.835729
North Korea	1	2.30681	2.76197	5.64154	3.28745	4.72296	49.2878	28.0369	N/A	43.798	20.08	23.4936	14.6246	11.8263	6.58845	10.698	8.18092	8.44765	7.28818	12.3941	12.5277
DR Congo	1	0.852289	1.38647	0.614655	0.451842	0.75345	1.16139	1.34122	1.83896	1.71536	3.14144	1.71664	3.42972	3.92219	3.58037	5.33538	3.17593	3.45878	3.23943	2.73173	2.57213
Denmark	1	0.847366	0.582221	0.589275	0.549985	0.504043	0.975868	1.17063	1.24947	1.30492	1.30699	1.65661	1.40723	1.37642	1.09545	1.05371	0.970695	0.977641	0.912256	0.849899	0.808091
Djibouti	1	0.900865	1.00239	1.15959	2.46372	0.914682	93.9352	95.5722	45.9199	29.5544	20.8054	18.487	16.1834	6.65636	N/A	3.6892	10.0335	10.4203	11.9086	9.74249	11.525
Dominica	1	1.29632	1.36016	1.15672	N/A	1.26183	0.981301	0.782395	1.09424	0.904398	1.752	0.675647	0.98246	1.13194	1.08295	1.23088	1.03159	0.610309	0.210078	0.811202	1.12379
Dominican Republic	1	1.06606	1.13411	0.930345	1.32038	1.13493	0.982532	1.33436	1.28095	0.995565	1.28852	1.23453	1.71957	1.40363	1.5233	1.45658	1.5059	1.53615	1.79855	1.70318	2.01588
Ecuador	1	0.983159	1.15968	1.20513	0.791491	0.584709	0.886534	1.18681	1.03634	1.2658	1.23321	1.32932	1.13199	1.14983	1.16137	1.33051	1.33837	1.31191	1.32669	1.33336	1.32086
Egypt	1	0.954351	1.06271	1.20109	1.61533	2.06794	2.42028	2.49649	0.945371	1.52156	1.85076	1.88395	2.26038	3.57608	1.71385	3.84081	3.30217	3.26532	2.14147	2.85178	3.23326
El Salvador	1	0.929156	1.0036	0.868285	1.21402	1.13849	1.04746	1.06631	1.22613	1.04537	0.887699	0.950179	1.04963	1.02826	0.804404	0.842184	1.02798	0.861563	0.819488	0.769634	0.876767
Equatorial Guinea	1	2.8957	4.45669	5.1992	7.45718	59.3926	107.326	37.7487	80.3441	139.493	65.3488	60.5582	137.721	157.122	216.587	156.745	N/A	230.466	130.359	162.397	137.564
Eritrea	1	1.09421	1.08885	1.10953	1.10122	1.36271	1.86463	2.3546	3.8284	3.88407	2.44632	0.927746	1.16697	0.795932	0.85385	0.581409	2.04642	0.87145	0.652963	0.819684	0.777049
Estonia	1	0.993822	1.04518	1.7017	1.28792	1.52085	4.05824	4.15217	5.5513	6.85177	5.89943	5.66069	4.52519	1.9286	0.939021	1.27073	1.28709	1.28177	1.48681	1.35056	1.3241
Ethiopia	1	1.16064	1.15557	1.02872	1.42086	2.08414	1.82249	1.28754	2.79067	1.96548	2.77562	2.62868	2.47726	5.46388	4.78556	5.55542	7.91325	3.45663	3.98463	3.94724	5.45104
Fiji	1	1.12135	1.04273	1.43038	0.711968	0.495838	0.621167	0.63214	0.659862	0.689006	0.499663	0.553494	0.738614	0.652532	0.419663	0.525055	0.619328	0.452012	0.423313	0.37975	0.470604
Finland	1	0.874112	0.825723	3.01913	1.4126	2.86661	5.33218	5.36174	4.90482	4.89378	5.05779	4.07475	3.24589	4.9756	0.444043	2.08271	2.16668	1.90206	2.84652	2.72474	2.81434
Netherlands Antilles	1	1.05499	0.813541	0.736115	0.500326	0.457592	0.227505	0.256405	0.276656	0.20501	0.196544	0.213959	0.265943	0.161079	0.216758	0.207615	0.0582058	0.0231874	N/A	N/A	N/A
France	1	0.941641	0.915857	0.867594	1.03846	1.00334	1.25787	1.29658	1.21943	1.4312	1.7529	1.01995	1.61549	1.6506	1.24257	1.23013	1.03548	0.788288	0.920093	0.892926	0.89853
French Polynesia	1	1.08179	0.928284	0.956836	1.00036	1.21896	1.03217	1.07912	1.15794	1.0965	1.16903	1.67867	2.59598	2.10301	1.50527	1.08524	1.02301	1.7687	0.855075	0.740949	0.742176
Gabon	1	1.45818	1.45631	1.07242	0.971008	0.742297	1.31345	1.25523	0.960214	0.961182	0.723363	1.07132	0.624532	1.28131	0.609863	0.96469	0.831166	1.08575	0.830364	0.912172	0.8147
Gambia	N/A	N/A	N/A	N/A	N/A	N/A	N/A	N/A	N/A	N/A	N/A	N/A	N/A	N/A	N/A	N/A	N/A	N/A	N/A	N/A	N/A
Georgia	1	1.31473	1.94415	1.83115	1.44544	2.70251	2.00025	2.23789	1.91911	4.72103	4.24301	4.54831	5.18115	3.28635	2.15092	5.18972	6.3968	3.51403	4.00414	3.48872	3.67024
Germany	1	1.02377	0.962911	0.942871	1.16377	1.18644	1.94695	1.77946	1.86579	1.86691	1.63526	1.8005	1.65304	1.69232	1.36799	1.45688	1.52934	1.37575	1.42005	1.4216	1.47936
Ghana	1	1.02073	1.11525	1.04189	1.68486	1.09509	2.31386	2.64298	4.53783	2.88168	6.33351	6.63902	2.42121	2.29384	2.09774	2.92291	3.34626	4.56811	3.77428	2.60041	2.41637
Greece	1	1.27785	1.23823	1.35806	1.90723	2.03775	3.18615	3.20246	3.09841	2.70003	2.9194	2.81444	3.15064	2.8718	1.95534	1.8127	2.32653	1.73052	1.55435	1.58767	1.4989
Greenland	1	1.19533	1.27987	0.72749	1.041	0.275675	0.307728	0.28041	0.79686	0.456251	0.475346	0.559638	0.435793	0.721935	0.694572	0.672555	0.641374	0.399768	0.414586	0.355179	0.359358
Grenada	1	1.43895	1.51899	1.76574	1.03834	3.30997	2.29161	2.16553	4.26948	3.47895	3.91216	2.80468	3.67393	3.17361	2.1595	2.42201	3.2444	2.30613	2.30365	1.72925	2.10933
Guatemala	1	0.871177	0.924808	1.10605	1.07726	0.932975	1.15122	1.34696	1.35435	1.23607	1.71011	1.39464	1.65783	1.52369	1.39558	1.48866	1.4963	1.59028	1.53131	1.64625	1.87236
Guinea	1	0.935505	1.0234	1.16394	1.05634	0.540971	1.05352	1.35046	2.20177	1.41411	0.987664	2.11963	2.78847	1.85214	0.705482	1.42647	1.71841	1.93243	2.45962	2.45298	2.43399
Guinea-Bissau	1	0.579234	0.37386	0.225069	0.356388	0.342127	0.646644	0.590147	0.173601	0.768975	0.775399	0.659788	0.653118	0.722989	0.710682	0.834342	0.710886	0.574405	0.966273	0.789335	0.851052
Guyana	1	1.43849	1.14353	1.26683	0.858915	2.09888	0.549406	0.592556	0.604093	0.73455	0.691118	0.643557	0.776387	0.741347	0.595218	0.711043	0.807107	1.03367	1.1125	1.03443	1.27508
Haiti	1	1.1289	1.02236	1.09827	1.53873	1.48703	2.0005	2.50807	2.07682	3.47621	3.49709	4.39104	0.865326	N/A	N/A	N/A	N/A	N/A	N/A	N/A	N/A
Honduras	1	1.03314	0.783485	0.990086	0.899677	1.49044	1.2424	1.24226	1.11948	1.50538	1.03462	1.02136	1.11102	0.993388	0.81232	0.70473	0.741744	1.07957	0.89041	1.02422	1.16044
Hungary	1	1.24876	1.34201	2.13408	2.04307	2.08796	2.97363	3.36961	3.62645	3.64332	3.35974	2.89899	2.7484	2.91422	2.1565	2.04076	2.35197	1.86774	1.87537	2.14662	2.33824
Iceland	1	1.17461	1.23124	0.814827	1.507	1.10433	6.62506	1.47048	2.11289	2.06318	2.2001	2.60863	3.26392	2.08861	1.07762	0.731012	0.752512	0.713023	0.787768	0.84602	0.925989
India	1	1.42921	1.62014	1.64897	2.09421	2.51745	3.84827	4.26638	4.19687	3.90122	4.12146	5.31419	6.24468	6.95889	6.21268	6.73809	8.04715	7.60313	7.81398	7.82486	7.99715
Indonesia	1	1.10991	1.12043	0.948133	0.9822	1.53284	1.92268	2.02777	1.20801	1.58758	1.6494	1.73263	2.21326	2.94712	2.60828	3.41743	3.73759	2.83245	3.33399	4.75333	4.76508
Iran	1	1.10397	1.00641	1.02999	1.56598	1.83398	1.80693	1.9846	1.06212	1.12311	1.68501	1.84118	1.29081	2.19365	3.37966	2.53122	1.95222	4.64241	3.64109	3.10537	3.28327
Iraq	1	5.22633	8.30388	11.9348	18.0003	15.9394	15.9696	13.9334	25.2298	22.4288	25.8768	30.3741	14.6876	23.69	36.1508	39.1984	37.6371	29.6282	24.6683	22.995	23.2196
Ireland	1	1.12459	1.23489	1.41575	1.74892	2.11467	4.92314	4.4237	4.2615	4.03691	3.93042	4.42342	4.48717	3.85452	3.05808	2.95094	2.67001	3.05888	3.1436	3.66398	4.22858
Israel	1	1.28464	1.17499	0.958843	1.26715	0.970688	1.01113	1.07752	0.992722	1.23067	1.06753	1.20232	1.05316	1.08913	1.03279	1.41223	1.61015	1.39464	1.20223	1.06413	1.08093
Italy	1	0.942633	0.940678	1.00625	1.17551	1.26112	1.8059	1.704	1.75345	1.92108	1.76457	2.16237	1.89961	1.42188	1.06591	1.05735	1.08506	0.871617	0.913882	0.920606	0.931367
Jamaica	1	0.993532	0.943182	0.89115	0.890953	1.48275	1.4398	2.05181	2.09783	3.4003	1.71495	1.69233	1.58264	1.93232	1.38309	1.49664	1.11376	1.2982	1.52928	1.32516	1.73187
Japan	1	0.995661	0.895783	1.27532	1.05434	1.50126	1.83642	1.42489	1.52146	1.8052	1.66736	1.38906	1.32922	1.40524	0.85883	1.06464	1.04726	0.978504	0.923559	0.854249	0.826778
Jordan	1	1.0101	1.03241	0.843168	0.737285	0.918409	1.3381	1.15026	0.938021	1.0368	1.12816	0.924169	1.23655	0.990434	0.644812	1.12138	0.705226	0.61303	0.823337	0.900378	0.834388
Kazakhstan	1	0.804188	0.993824	1.10448	0.817146	1.50953	3.12206	2.79608	2.61932	3.16161	3.38478	3.17195	3.2193	3.17817	1.53556	3.02685	3.88552	4.94282	4.44539	3.60934	3.75508
Kenya	1	0.978116	1.04647	0.96396	0.811941	1.03369	1.68237	2.8592	2.04867	1.60046	1.89108	2.13765	3.75628	2.53069	3.4564	4.00514	4.61382	3.3695	2.98004	3.82334	3.828
Kiribati	1	1.14702	0.967971	0.718464	0.778336	1.17581	N/A	0.466402	0.423845	0.532556	N/A	0.258249	1.47759	0.401818	0.340791	0.485796	0.873555	0.518543	0.636287	0.169083	0.5213
Kosovo	1	0.574109	0.59721	0.412594	0.262322	0.463758	0.630936	0.550261	0.673401	0.623295	0.458872	0.485762	0.419682	0.498272	0.45309	0.579361	0.431376	0.444341	0.442437	0.470943	0.348838
Kuwait	1	0.688476	0.692436	0.557621	0.69908	0.703903	0.807674	0.949349	2.1148	0.761106	0.955982	0.92018	1.82072	1.13134	1.2694	1.37036	1.70774	1.20493	1.09516	1.4327	1.31754
Kyrgyz Republic	1	2.35115	1.82289	2.28813	0.29474	1.40607	3.22519	4.26836	4.72962	4.11044	3.94823	4.08473	4.67641	5.34824	3.88517	3.98328	5.75515	4.5288	4.52338	3.51605	3.06064
Laos	1	1.22017	1.20946	1.05241	1.46985	4.61965	3.8425	3.6514	1.44579	1.32968	1.90351	1.58018	1.83792	2.41621	1.89454	2.07044	2.28482	3.02471	2.91921	4.00318	4.13021
Latvia	1	1.28047	1.32442	1.58602	2.03494	3.20934	4.59759	6.1852	6.46299	11.4315	11.873	12.3138	15.1595	8.52976	3.2825	4.43379	4.96151	7.26062	5.49811	8.32614	8.46706
Lebanon	1	1.099	1.16889	1.03202	1.43786	0.997529	1.76978	1.73954	1.60994	2.32631	2.72342	2.58805	2.72213	2.57291	2.27875	3.44611	3.23181	2.79792	2.4309	3.35555	3.63026
Lesotho	1	1.21115	1.14704	1.29058	0.872589	1.35159	2.22372	2.1524	0.70657	0.782601	0.497319	0.680905	0.906587	0.520441	0.435976	0.564732	0.766199	0.571737	0.452975	0.448771	0.560438
Liberia	1	2.39161	3.93683	3.68106	18.6498	4.21748	7.4413	6.55749	9.38367	18.4348	24.2583	100.526	70.8247	89.3436	36.7514	37.422	67.6812	61.6994	81.8624	125.061	88.5089
Libya	1	1.21972	1.14639	0.831048	0.311967	0.17809	0.243128	0.533374	0.486443	0.589642	0.476987	0.529598	0.758622	0.896924	1.12566	1.75203	0.696794	1.57056	1.0235	0.727162	0.763491
Liechtenstein	N/A	N/A	N/A	N/A	N/A	N/A	N/A	N/A	N/A	N/A	N/A	N/A	N/A	N/A	N/A	N/A	N/A	N/A	N/A	N/A	N/A
Lithuania	1	1.04822	1.22654	1.30391	0.810907	1.33869	3.69653	3.33035	2.96482	2.96825	3.37911	3.64454	4.0766	4.4495	2.53482	4.08902	4.60279	3.98468	4.40601	4.28258	4.5785
Luxembourg	1	0.845231	0.894947	0.905584	0.871268	N/A	2.04071	1.67441	1.32898	1.58376	1.20743	1.40331	2.09061	1.89572	1.34919	1.88024	1.91053	1.32769	1.54952	1.55341	1.79976
Madagascar	1	1.00408	1.0559	1.02964	1.07206	2.17117	1.43734	0.912709	2.11805	1.93619	1.86752	2.17738	3.45591	3.2122	1.73782	1.7563	1.95773	2.49509	1.77125	1.7283	1.62919
Malawi	1	0.711172	1.24934	0.878431	1.93616	1.50299	1.59461	3.16273	1.85176	1.94348	1.88433	1.45353	1.34282	1.61175	1.91097	1.81302	1.8268	1.76596	2.22799	1.93105	1.57413
Malaysia	1	1.21491	1.18596	1.05393	1.07113	1.52603	1.39395	1.4587	0.813011	0.886962	0.847339	0.958298	1.07417	1.02278	0.745797	0.851962	0.968922	1.04264	0.997455	1.01118	1.04375
Maldives	N/A	N/A	N/A	N/A	N/A	N/A	N/A	N/A	N/A	N/A	N/A	N/A	N/A	N/A	N/A	N/A	N/A	N/A	N/A	N/A	N/A
Mali	1	1.11345	1.11137	1.01433	0.816929	0.798991	1.23778	1.20923	1.3553	1.1984	1.40406	1.76891	1.66797	0.872476	1.2067	1.11518	1.32155	1.97143	1.40201	2.1658	2.13412
Malta	1	0.821258	0.736969	0.856755	1.01381	0.777937	2.01711	1.91669	1.47938	1.00183	0.846972	0.82288	0.951378	1.08639	1.22094	0.954535	0.848733	1.32575	1.3306	1.09117	1.21835
Marshall Islands	1	0.839844	0.763789	N/A	0.545517	0.305737	0.440183	0.400453	0.304654	0.27055	0.791354	0.263897	0.164001	0.123988	0.148365	0.147902	0.128866	0.161105	0.109541	0.12089	0.107207
Mauritania	1	1.09979	1.09903	0.82422	0.428019	0.443552	1.07966	1.44937	2.70908	2.19839	1.31439	7.43091	2.19151	1.9466	1.45372	1.56115	2.53279	2.48213	1.98195	1.55315	1.31319
Mauritius	1	1.768	1.4593	1.56619	2.00419	3.04778	3.73626	2.88109	1.01012	2.38506	3.82261	1.0814	0.836204	1.95906	0.909446	1.47559	1.43805	1.91407	2.44442	2.34893	1.76607
Mexico	1	1.18436	1.43847	2.45526	1.60162	3.00778	3.48703	2.76302	2.55428	2.71826	2.85636	2.96663	3.06756	3.09	2.36821	2.43073	2.57618	2.5459	2.48515	2.57017	2.62007
Micronesia, Fed. Sts.	1	N/A	1.20868	1.17846	1.10218	0.937371	1.36662	1.17531	1.57401	1.24464	1.1053	9.09662	6.56496	2.43283	0.877981	1.0824	0.864051	0.898525	0.887995	0.623481	0.700509
Monaco	N/A	N/A	N/A	N/A	N/A	N/A	N/A	N/A	N/A	N/A	N/A	N/A	N/A	N/A	N/A	N/A	N/A	N/A	N/A	N/A	N/A
Mongolia	1	1.0355	1.00781	1.36767	0.86596	2.53997	5.30343	6.37086	3.67477	5.46452	6.00944	5.10668	4.08749	5.67317	1.60906	4.13553	4.36944	3.56271	3.65743	4.00075	2.92329
Montenegro	1	0.857359	0.893584	0.633197	0.563088	0.702799	3.62453	3.86017	1.94071	4.44537	3.41181	5.69509	6.39968	7.85037	5.36923	5.3451	5.48319	5.48829	5.34728	5.32232	5.94853
Montserrat	1	1.03553	N/A	0.788383	0.215953	0.699348	0.569406	0.883273	1.04784	1.21494	0.23419	0.442859	0.699884	0.817164	0.305386	0.283037	0.228073	0.392485	0.398915	0.428559	0.580492
Morocco	1	1.05494	1.16511	0.992897	1.09856	1.21227	3.1185	4.68679	3.13631	4.04917	4.11879	3.95075	5.1494	4.62971	4.15226	4.24397	4.03072	3.51352	3.31279	3.88288	3.55227
Mozambique	1	0.876569	0.901445	0.825375	4.425	6.00327	10.9929	6.38697	5.83173	3.97814	6.00287	3.59584	3.00049	3.66207	2.89176	3.38884	4.95352	9.22068	11.404	7.98344	8.12607
Myanmar	1	0.819707	0.801753	1.24587	1.08636	0.653076	1.05555	0.919422	0.672289	0.624314	0.73119	1.12598	1.2485	0.977423	N/A	N/A	1.4494	1.50892	2.66657	3.42822	4.08158
Namibia	1	1.27768	1.2136	1.35486	0.996106	1.53016	4.20418	3.12119	1.53377	1.49453	0.948363	1.12423	1.9706	1.20673	1.29014	1.28672	1.7358	1.41945	1.29393	1.36965	1.54197
Nauru	N/A	1	0.756123	0.441953	0.493247	N/A	0.757755	N/A	0.693189	N/A	N/A	0.221964	0.169127	0.246385	0.21411	0.582529	0.588694	0.306051	0.866146	1.29717	1.9355
Nepal	1	0.989817	1.1624	1.33016	1.23097	1.16951	1.32723	1.14097	1.22691	1.33966	1.32547	1.57756	1.48318	1.27773	1.10561	1.85336	1.68095	2.0331	2.37998	2.92075	2.82025
Netherlands	1	1.14151	1.09528	1.14218	1.1995	1.22777	2.09949	1.70416	1.77334	1.83746	1.83218	1.73428	1.69673	1.80686	1.65311	1.58386	1.57227	1.48322	1.59477	1.61078	1.66646
New Caledonia	N/A	N/A	N/A	N/A	N/A	N/A	N/A	N/A	N/A	N/A	N/A	N/A	N/A	N/A	N/A	N/A	N/A	N/A	N/A	N/A	N/A
New Zealand	1	1.07838	1.05002	0.72174	0.972693	0.934098	1.52626	1.62023	1.55973	1.45962	1.66481	1.41541	1.77146	1.45009	1.25124	1.35288	1.09896	1.08812	1.16216	1.22212	1.22763
Nicaragua	1	0.9643	1.12094	1.2058	1.08405	0.972373	1.2848	1.14956	1.13441	0.882915	0.662992	1.13159	1.1477	1.16009	1.07294	1.22504	1.78784	2.03148	2.59956	1.72692	2.18423
Niger	1	1.0528	1.10164	0.952836	0.715765	0.913579	2.56922	1.01115	1.51456	1.74473	1.0792	0.810745	0.505075	0.724594	1.06557	3.01112	1.93031	3.04096	1.8147	1.98085	1.87138
Nigeria	1	1.01443	1.10519	0.880032	0.568157	1.0418	2.44434	2.13092	2.68083	1.78882	1.92832	1.91868	2.65014	2.78316	2.81195	3.1789	5.90168	2.62937	2.68752	2.60528	2.37793
Norway	1	1.22074	1.34335	2.03122	1.40351	2.06676	2.53621	2.54513	1.99257	2.02258	2.07403	1.96192	1.78025	1.94242	1.30213	1.61319	1.95181	2.29776	2.00865	1.79027	1.67931
Oman	1	0.684032	0.813302	0.871549	0.794695	0.899827	0.90747	0.658693	0.96926	0.755381	0.960927	1.01821	2.22431	2.51832	1.02259	1.14035	1.00949	0.956786	0.935544	1.36526	1.19316
Pakistan	1	1.02803	0.966298	1.09987	0.960565	0.854402	0.803549	1.00304	1.04087	1.14953	1.4436	1.62613	1.57023	2.32605	1.19337	1.23891	1.28809	1.33848	2.04003	1.8895	2.05659
Palau	1	N/A	N/A	0.577456	N/A	0.393433	0.0615802	0.0392538	0.024751	0.0138352	0.369984	0.284987	0.367335	0.406639	0.559777	0.274483	0.240145	0.27984	0.218176	0.287444	0.387067
Panama	1	0.884454	0.911174	0.954083	0.801154	1.13617	0.889834	0.893132	0.715943	0.67201	0.82176	0.96853	1.03079	1.10565	1.08979	1.13305	1.07602	1.53315	1.47232	1.69031	1.84039
Papua New Guinea	1	1.30715	1.22561	3.19751	0.782458	0.493195	0.640223	0.64038	0.59606	0.528775	0.420404	0.506513	0.582772	0.577874	0.573013	0.791511	0.806352	1.07086	0.658237	0.529691	0.498396
Paraguay	1	0.911489	0.885089	0.722186	0.678165	0.612624	0.593932	0.648198	0.548179	0.63717	0.563104	0.560868	0.562399	0.778425	0.708517	0.790173	0.796207	0.872533	1.14683	1.42533	1.41235
Peru	1	1.08658	1.12593	0.86304	0.804432	0.746623	1.11183	1.36782	1.34545	1.43618	1.40568	1.52386	1.73471	1.69448	1.1893	1.36458	1.34622	1.85072	2.67881	2.67829	2.33762
Philippines	1	1.38003	1.67927	1.33954	1.50004	1.52725	1.09176	1.27931	0.760463	0.696845	0.637019	1.08892	0.684678	0.649083	0.537669	0.647462	0.749868	0.831844	0.76387	0.905848	1.03177
Poland	1	1.24171	1.36886	1.64162	1.86535	2.41153	4.81434	3.98154	3.6489	4.06054	4.77179	4.70432	5.26412	5.4593	4.04788	4.55123	4.60214	4.44331	4.23939	5.0536	5.55465
Portugal	1	2.09233	3.43497	1.37348	5.5444	5.02289	8.09191	6.54134	3.73032	4.87826	3.74347	4.95559	2.7921	3.01128	2.12683	1.85993	1.6481	1.29288	1.5186	1.32787	1.33861
Puerto Rico	1	1.01889	0.980411	0.945414	1.04988	0.848373	1.22568	1.13646	1.11196	1.38752	1.23401	1.01395	N/A	N/A	1.14251	N/A	N/A	0.879965	0.688554	0.659104	0.983773
Qatar	1	0.730502	0.838957	0.540787	0.46468	2.83935	4.7627	1.06396	3.37107	1.00739	1.61208	4.73304	2.95064	2.82341	3.2078	4.57587	6.79269	8.13367	6.91228	6.96638	7.30978
South Korea	1	1.15103	1.10357	1.3873	1.15518	2.20078	1.52716	1.61561	1.39936	1.57836	1.48675	1.76376	1.65592	1.63173	1.10511	1.53581	1.66925	1.51317	1.60415	1.53232	1.50183
Moldova	1	1.44781	1.92849	1.30576	0.920688	1.44771	3.33326	3.79675	8.34884	6.79326	5.04544	4.26271	5.12967	4.97808	3.39675	3.79329	4.1825	4.11377	4.36671	5.0512	5.66295
Romania	1	0.848854	0.919088	0.883151	0.861175	1.00944	2.80855	3.52218	5.66399	4.84233	4.64103	4.43336	3.86881	3.63647	3.14428	3.30645	3.11005	3.30545	3.12401	3.34374	3.54915
Russia	1	0.76823	0.790874	0.577103	0.756971	0.822326	1.29543	1.06018	1.05292	1.32273	1.20809	1.40125	1.17885	1.44656	N/A	1.21603	1.46716	1.32728	1.18158	1.17961	0.748924
Rwanda	1	1.28529	1.76601	0.77025	0.789017	0.466318	0.438324	1.26263	0.617485	0.725544	1.16929	0.653461	1.09767	1.18203	1.55686	1.45591	1.9184	2.41845	1.89165	1.91094	1.85965
St. Kitts and Nevis	1	1.15964	1.0721	1.30517	0.651926	1.75764	1.60082	1.47529	2.67999	2.98177	1.36006	2.43493	1.81305	2.11684	2.57415	1.45163	N/A	1.0886	2.0295	1.41138	1.7512
St. Lucia	1	2.11102	2.13233	0.894457	0.456019	1.34254	0.453867	0.460265	1.30575	1.1933	1.10046	0.74875	0.96709	0.591473	0.330359	0.709034	0.676761	0.476532	0.765438	0.431043	0.56066
Samoa	1	1.08445	1.04617	1.05398	1.11942	0.753281	0.597019	2.03131	0.565178	0.571132	0.563485	0.53651	N/A	N/A	1.01138	1.0301	1.8474	0.825013	0.820424	0.720969	1.30605
San Marino	N/A	N/A	N/A	N/A	N/A	N/A	N/A	N/A	N/A	N/A	N/A	N/A	N/A	N/A	N/A	N/A	N/A	N/A	N/A	N/A	N/A
Sao Tome and Principe	1	1.29947	0.892041	0.55139	0.724566	1.30612	0.804349	1.95192	1.82272	3.66367	0.832682	1.72796	0.50314	1.39674	N/A	4.89341	1.4228	1.15812	1.82892	1.69716	1.87337
Saudi Arabia	1	1.22571	1.22716	0.83189	4.97568	5.44152	3.69317	8.10255	7.37404	6.21979	7.15151	11.4798	11.4283	8.48188	6.87957	8.09093	7.50146	4.34207	4.61666	4.40608	4.18469
Senegal	1	1.19923	1.25105	1.15797	1.77225	1.21691	6.55668	13.8886	5.53155	6.99822	10.9153	8.95968	13.6	13.0916	1.44901	9.82781	5.85727	8.08945	1.47488	1.43981	1.30097
Serbia	1	2.38845	2.51769	1.84016	1.01146	0.247298	0.961948	1.31218	0.854356	1.96326	1.28046	2.25858	1.63312	2.5551	1.39249	1.70772	1.51411	1.41675	1.8888	1.16314	1.28298
Seychelles	1	1.44421	1.43613	1.44669	1.31012	0.618503	1.32701	1.34378	1.3385	0.720846	0.720241	1.57544	0.559028	0.623147	0.824386	0.90431	0.845854	1.01176	1.60326	1.85314	1.87925
Sierra Leone	1	1.44907	0.578076	0.521279	1.80416	2.0629	3.18133	3.27053	3.11958	3.60941	3.50816	4.03955	5.3386	4.15425	4.09737	3.76139	6.50663	6.15176	8.47061	12.7945	10.417
Singapore	1	1.06669	1.05729	1.05545	0.988854	1.10259	1.33256	1.25669	1.19545	1.21933	1.34321	1.50475	1.39105	1.38781	1.13724	1.38069	1.42209	2.18275	1.457	1.36964	1.45249
Sint Maarten	N/A	N/A	N/A	N/A	N/A	N/A	N/A	N/A	N/A	N/A	N/A	N/A	N/A	N/A	N/A	N/A	N/A	N/A	N/A	N/A	N/A
Slovakia	1	0.968289	1.06619	1.01069	0.820931	0.957838	1.99179	1.46821	2.10607	1.72726	1.90772	2.14768	2.45431	2.6286	1.83932	2.0587	2.35798	2.40024	2.38503	2.24062	2.43162
Slovenia	1	0.967217	0.906783	1.14033	1.47575	1.53194	1.69695	1.58369	2.72877	5.38298	5.26634	9.41824	6.85406	4.061	4.49351	2.78803	2.23672	2.16709	2.16179	1.85395	1.92246
Solomon Islands	1	1.27394	1.23856	1.18385	0.753265	1.06185	1.6318	0.829249	0.268903	0.361652	0.660264	0.555628	1.00803	0.692772	0.76553	1.55885	1.69269	0.786733	2.95837	2.599	3.25523
Somalia	1	1.28772	1.60852	1.20983	1.5341	2.0892	8.20882	5.39377	11.7464	11.8615	8.94477	11.1435	5.42186	3.91297	2.83344	1.457	1.05526	0.851832	1.60076	1.21759	1.21828
South Africa	1	1.23776	1.19123	1.33479	0.9511	2.00538	7.14966	7.07473	2.44835	2.95214	2.12132	2.66758	3.61291	2.05483	1.52355	1.78233	2.79333	2.14272	1.84782	1.72378	2.1227
South Sudan	N/A	N/A	N/A	N/A	N/A	N/A	N/A	N/A	N/A	N/A	N/A	N/A	N/A	N/A	N/A	N/A	N/A	N/A	N/A	N/A	N/A
Spain	1	1.12954	1.18398	1.30206	1.48902	1.57263	1.78918	2.90264	2.05175	2.01705	1.99203	1.78282	1.70457	1.67233	1.31248	1.25008	1.36378	1.35854	1.24622	1.18109	1.22737
Sri Lanka	1	0.965576	1.10235	1.35836	1.17267	1.3163	1.05695	1.04341	0.724297	0.826721	0.729565	0.812334	0.75233	0.873948	0.70489	0.876207	1.46413	1.41048	2.56697	1.2788	1.54983
St. Vincent and the Grenadines	1	1.03575	1.1306	1.22572	1.00911	1.60072	1.06687	1.07127	1.60704	4.02097	3.0355	1.57654	3.56549	1.79255	2.12496	1.93028	1.14634	1.70553	1.57298	1.96547	2.11301
Palestine	1	0.838073	0.904014	0.930066	1.40964	4.73562	11.4992	5.56699	8.57766	2.56724	1.91903	1.01859	0.471685	0.756751	0.452517	0.573078	0.672718	0.794761	0.785343	0.854349	0.841595
Sudan	1	1.00779	1.66128	1.9935	1.59255	4.24847	3.97703	6.64969	4.00448	3.37352	8.3935	7.65056	5.99695	5.07655	7.08766	11.3707	11.2549	N/A	N/A	N/A	N/A
Suriname	1	1.22456	0.976514	1.08125	0.532262	1.175	0.6918	0.91885	0.825785	0.999036	0.86693	0.760505	1.25394	0.9624	1.28267	1.00856	0.915048	0.855305	0.825943	0.942996	1.14949
Swaziland	N/A	1	0.99392	1.13739	0.873293	1.4772	1.69799	2.32847	0.961776	0.891106	0.576646	0.575272	0.827494	0.478866	0.421958	0.376428	0.566391	0.535633	0.431555	0.442555	0.549757
Sweden	1	0.99239	0.974459	2.11064	0.86221	3.05055	1.46619	1.33241	2.94631	3.2692	2.90438	2.38403	2.5058	2.6928	1.4094	2.05267	2.22906	2.06818	2.52196	2.58479	2.74444
Switzerland	1	1.09093	0.873947	0.755432	0.962879	0.709814	2.04129	2.14381	1.87885	1.71119	1.6127	1.74479	1.54116	1.73637	1.35278	1.38366	1.75032	1.6006	1.92466	1.47806	1.5042
Syria	1	1.21374	1.10209	1.23305	1.97374	2.24922	3.64716	4.30603	6.10129	4.43771	4.88048	3.99606	3.92664	6.31649	5.41501	4.68229	3.65685	2.50943	3.14633	2.13683	2.08139
Macedonia	1	0.822052	0.925199	0.903342	0.676767	0.983844	1.52359	1.80545	1.6843	2.193	1.50587	1.31698	1.56196	1.46918	1.58032	1.41617	1.37451	1.30851	1.24293	1.38741	1.44349
Tajikistan	N/A	1	1.16524	1.25652	0.217796	1.32346	4.7671	3.54641	2.47426	3.51879	4.04167	2.94956	3.51036	2.49052	1.97495	2.1657	4.83364	3.13716	N/A	3.26619	2.92137
Thailand	1	1.03239	0.907226	0.706403	1.46296	1.56573	1.80786	1.97686	1.75732	1.8969	3.593	2.13945	2.09791	2.28047	1.63751	1.79978	1.90628	2.24542	2.37597	2.20601	2.07307
Timor-Leste	1	1.15459	0.976196	1.56137	2.11058	42.1723	N/A	3.48344	4.05023	2.93753	3.46643	5.41908	6.97915	5.92943	11.0854	7.37525	1.19479	1.61248	9.75731	1.77786	1.46352
Togo	1	1.13119	1.09923	1.50081	0.916888	0.747878	0.829397	N/A	2.03962	1.78969	1.16222	0.766432	0.49639	0.546912	0.573815	0.594859	0.583064	0.517124	0.758057	0.595192	0.622357
Tonga	1	1.1506	0.89126	0.900972	0.727613	0.654994	0.400859	0.313883	0.251603	0.161928	0.140746	0.116631	0.360857	0.139055	0.27262	0.186768	0.526565	0.281048	0.226351	0.194667	0.396003
Trinidad and Tobago	1	1.54884	1.9421	1.41292	0.799373	0.871	0.783483	1.24238	1.05045	0.920306	1.03283	1.06794	1.22305	1.08877	0.788	0.837161	0.948133	0.975185	1.14911	1.21761	1.82349
Tunisia	1	0.914054	0.93166	0.832828	0.807211	1.21791	2.87067	5.57759	2.83181	3.1437	3.3859	2.92315	6.38134	4.69427	2.43218	3.44306	3.54822	2.71151	3.12779	2.87031	2.72859
Turkey	1	1.45662	1.55473	2.04784	1.51217	2.33576	1.82256	2.32489	2.40353	3.19869	3.10886	3.31407	3.6006	3.9713	2.19087	3.35889	4.45326	4.17148	3.68673	3.37015	3.37292
Turkmenistan	1	1.03208	0.823044	0.787284	N/A	N/A	2.17272	2.57387	2.37241	1.36625	1.01929	1.03873	2.34448	2.3998	1.83186	1.72519	1.96104	1.63492	1.97601	2.65339	1.96247
Turks and Caicos Islands	1	N/A	N/A	0.757325	0.973516	1.22911	2.65203	2.66272	1.93968	17.9364	22.7142	24.1507	43.3229	65.0524	42.0925	26.3842	8.05964	16.6069	8.92437	8.37507	5.9186
Tuvalu	N/A	N/A	N/A	N/A	N/A	N/A	N/A	N/A	N/A	N/A	N/A	N/A	N/A	N/A	N/A	N/A	N/A	N/A	N/A	N/A	N/A
Tanzania	1	1.11493	0.997881	0.981439	1.26435	0.747631	0.796823	1.27419	0.827695	1.05768	1.0123	0.953513	1.39862	1.31478	0.8204	1.48532	1.46382	1.88618	1.92136	1.99242	1.49384
Uganda	1	1.36718	0.940672	1.04273	0.973593	0.881567	1.16424	1.46643	1.33508	1.27331	1.46865	1.48386	1.43239	1.48948	1.80317	1.75764	2.21898	1.59546	1.60977	1.76527	1.9117
Ukraine	1	0.649743	0.697449	0.764643	0.592712	1.07973	1.61769	1.49284	3.14723	2.32244	1.75517	1.64756	1.63895	2.0497	0.860827	1.37705	1.7305	1.69875	1.55784	1.17593	0.840762
United Arab Emirates	1	1.03747	1.14672	0.939467	1.03178	1.24946	1.08234	1.14411	1.14562	1.38736	1.45935	1.35089	1.71414	1.69911	1.56405	1.75423	1.76829	1.77672	1.88242	1.92035	1.96232
United Kingdom	1	1.04871	1.10317	1.06894	1.18275	1.07401	1.31104	1.22802	1.19094	1.18012	1.4298	1.42882	1.18511	1.07376	0.821062	0.92109	0.778432	0.735474	0.763719	0.769381	0.779061
United States	1	1.06503	1.06582	1.06721	1.38729	1.27538	1.82528	1.70319	1.63297	1.69279	1.70513	1.68366	1.59834	1.46947	1.25989	1.30541	1.1564	1.24389	1.39082	1.5559	1.59738
Uruguay	1	2.01556	1.99248	1.05025	1.62256	1.75329	1.68821	1.79475	1.68407	2.84755	4.78932	5.2253	3.52258	4.22433	3.07936	3.29984	4.00183	4.33183	5.46866	4.80662	4.42008
Uzbekistan	1	1.56046	1.52987	1.51073	0.324503	1.57045	1.92748	1.19481	1.01017	1.36971	1.54793	1.49308	2.17796	2.17657	1.02849	1.40801	2.65383	1.66514	1.56399	1.85968	1.94229
Vanuatu	1	1.01163	0.878003	0.641544	0.6514	1.0345	0.475565	0.43631	0.608096	0.376381	0.389089	0.49664	0.882978	0.403125	0.751209	0.531958	1.02591	0.521148	0.917407	0.330819	0.559897
Venezuela	1	0.962583	1.13939	0.99323	0.863475	0.869752	2.19818	1.39881	1.04149	3.14696	2.75828	3.72766	5.67979	7.2954	7.00367	6.40509	3.82263	8.36667	9.82326	13.4343	10.7448
Vietnam	1	1.43947	1.60223	2.28954	2.12128	3.21159	8.8297	10.3623	8.97891	10.6403	11.0534	11.9083	20.1233	17.5284	18.2417	18.5811	22.9577	20.7919	27.8668	43.7013	52.6908
Yemen	1	1.31624	1.36305	1.26787	1.35291	1.75199	1.95222	2.03293	2.45108	3.27783	5.34005	6.56558	6.31609	6.12114	3.1044	4.48908	4.73137	5.08939	5.024	4.62576	3.69058
Zambia	1	1.32007	1.32677	1.31493	0.588485	0.504684	0.815509	1.021	1.55399	0.548973	0.678462	0.716885	0.729135	0.737297	0.768618	0.779387	0.722858	0.933834	1.20128	1.02739	1.2562
Zanzibar	1	1.13263	1.0306	0.991431	1.23709	1.18777	3.29432	2.17231	3.15622	2.73074	3.15577	3.79808	2.73302	3.09757	2.60517	3.7794	2.58037	4.27516	5.31313	5.50253	2.94687
Zimbabwe	1	1.04391	1.5447	0.34855	1.99211	0.693372	1.07252	1.59997	2.09909	2.24908	2.03735	1.98905	1.32314	2.39689	3.60171	2.49268	4.39264	2.95831	4.38073	4.25721	2.98187
Taiwan	1	1.07693	1.08315	1.13741	0.660302	1.40071	0.560587	0.5672	0.623784	0.745692	0.729322	0.713003	1.44787	0.636498	0.529292	0.632085	N/A	0.629353	0.630091	0.531476	2.03715
World	1	1.06399	1.08837	1.1458	1.21585	1.46391	1.88973	1.8866	1.73957	1.88026	1.89807	1.93907	2.03698	2.06301	1.46391	1.9545	1.96439	1.95037	2.02653	2.12579	2.20004

[truncated: 17 more sheets: land_imports_of_global, land_production, land_production_growth, land_consumption, land_consumption_growth, Cropland_pc, Forest_pc, Grazing_land_pc, Other_land_pc, Infrastructure_land_pc, Marginal_land_pc, Cropland_importshare, Forest_importshare, Grazing_land_importshare, Other_land_importshare, Infrastructure_land_importshare, Marginal_land_importshare]
